# Supplementary material for: Identification of Immune-Related lncRNA Pairs and Construction and Validation of a New Prognostic Signature of Colon Cancer
Source: Can J Gastroenterol Hepatol. 2022 Mar 30;2022:5827544. doi: 10.1155/2022/5827544 (PMC8986404; doi:10.1155/2022/5827544)
Supplement: Supplementary Materials — Supplementary data 1: 2843 immune genes were downloaded from the ImmPort database. Supplementary data 2: a total of 1,342 immune-related gene mRNA expression matrices. Supplementary data 3: 694 immune-related lncRNA expression matrices. [file 5827544.f1.zip]

Archive with 3 entries (3 files):
- 5827544.f1/Supplementary data 1.txt
- 5827544.f1/Supplementary data 2.txt
- 5827544.f1/Supplementary data 3.txt
