# Supplementary material for: Identification of Immune-Related lncRNA Pairs and Construction and Validation of a New Prognostic Signature of Colon Cancer
Source: Can J Gastroenterol Hepatol. 2022 Mar 30;2022:5827544. doi: 10.1155/2022/5827544 (PMC8986404; doi:10.1155/2022/5827544)
Supplement: Supplementary Materials — Supplementary data 1: 2843 immune genes were downloaded from the ImmPort database. Supplementary data 2: a total of 1,342 immune-related gene mRNA expression matrices. Supplementary data 3: 694 immune-related lncRNA expression matrices. [file 5827544.f1.zip › 5827544.f1/Supplementary data 2.txt]

ID	TCGA-AA-3663-11A-01R-1723-07	TCGA-AA-3531-11A-01R-A32Z-07	TCGA-AA-3511-11A-01R-1839-07	TCGA-AA-3662-11A-01R-1723-07	TCGA-F4-6704-11A-01R-1839-07	TCGA-AA-3514-11A-01R-A32Z-07	TCGA-A6-2683-11A-01R-A32Z-07	TCGA-AA-3489-11A-01R-1839-07	TCGA-A6-2684-11A-01R-A32Z-07	TCGA-AA-3520-11A-01R-A32Z-07	TCGA-A6-2675-11A-01R-1723-07	TCGA-AA-3496-11A-01R-1839-07	TCGA-AA-3527-11A-01R-A32Z-07	TCGA-A6-2685-11A-01R-A32Z-07	TCGA-AA-3518-11A-01R-1672-07	TCGA-AZ-6601-11A-01R-1774-07	TCGA-AA-3516-11A-01R-A32Z-07	TCGA-AZ-6603-11A-02R-1839-07	TCGA-AA-3655-11A-01R-1723-07	TCGA-AZ-6600-11A-01R-1774-07	TCGA-A6-2678-11A-01R-A32Z-07	TCGA-AA-3713-11A-01R-1723-07	TCGA-AZ-6599-11A-01R-1774-07	TCGA-AA-3712-11A-01R-1723-07	TCGA-AA-3660-11A-01R-1723-07	TCGA-A6-2686-11A-01R-A32Z-07	TCGA-AA-3525-11A-01R-A32Z-07	TCGA-AZ-6598-11A-01R-1774-07	TCGA-A6-5659-11A-01R-1653-07	TCGA-AA-3517-11A-01R-A32Z-07	TCGA-A6-2671-11A-01R-A32Z-07	TCGA-AA-3534-11A-01R-A32Z-07	TCGA-AA-3697-11A-01R-1723-07	TCGA-AZ-6605-11A-01R-1839-07	TCGA-A6-5665-11A-01R-1653-07	TCGA-AA-3522-11A-01R-A32Z-07	TCGA-A6-2682-11A-01R-A32Z-07	TCGA-A6-5662-11A-01R-1653-07	TCGA-A6-2679-11A-01R-A32Z-07	TCGA-A6-2680-11A-01R-A32Z-07	TCGA-A6-5667-11A-01R-1723-07	TCGA-CM-5864-01A-01R-1653-07	TCGA-AD-6890-01A-11R-1928-07	TCGA-AA-3516-01A-02R-0826-07	TCGA-A6-2679-01A-02R-1410-07	TCGA-CM-4747-01A-01R-1410-07	TCGA-AA-3833-01A-01R-0905-07	TCGA-CM-6675-01A-11R-1839-07	TCGA-DM-A280-01A-12R-A16W-07
AZGP1	124	48	103	61	177	85	95	104	44	121	243	163	131	107	154	138	112	129	72	91	194	614	808	229	204	938	238	478	300	451	380	295	273	67	272	730	844	433	312	1173	266	6023	1337	135	2845	2934	667	7838	1748
B2M	762	2204	1145	518	1768	2478	1586	713	1874	2346	627	457	2278	2548	1263	1102	1792	988	1078	1379	1735	222203	173953	173837	253290	245900	349016	166460	116264	310493	297475	168928	218183	61855	149825	256043	209478	158124	358511	295922	133956	101836	81528	156102	11977	9738	47322	94538	144983
CALR	519	719	767	697	488	556	993	482	649	1011	516	369	915	677	758	660	643	670	642	409	876	37046	38501	27532	25316	42816	33292	31562	14692	50761	34671	32156	98423	17638	24937	40118	41721	24669	43731	32858	32064	21414	49949	33843	8576	16117	23807	50227	58826
CANX	140	149	296	362	257	96	251	293	171	218	188	172	204	261	160	188	107	307	376	147	253	26300	33031	22119	18665	35351	23574	24876	15655	37324	28300	29211	42307	22026	20279	38444	32249	23179	24302	41046	24267	26354	22725	23471	1483	6618	16935	46782	30924
CD1A	1	0	1	0	1	0	1	0	1	1	0	0	3	1	0	3	0	1	0	0	2	12	3	12	42	5	22	10	3	102	11	33	26	5	7	19	23	17	9	4	17	8	18	7	0	5	16	57	2
CD1B	0	0	0	0	0	0	0	0	0	0	0	0	0	0	0	0	0	0	0	0	0	7	3	5	7	5	21	3	1	15	1	9	34	1	1	4	5	3	14	1	3	5	4	2	4	1	6	3	0
CD1C	90	117	158	194	121	98	114	167	115	155	121	70	125	221	126	141	118	138	175	116	167	127	34	102	160	107	294	178	88	707	62	197	200	121	69	147	181	214	150	92	203	12	22	13	3	7	19	30	3
CD1D	0	0	0	0	0	1	0	0	0	1	0	0	0	0	0	0	0	0	0	0	0	289	359	522	371	292	408	340	129	652	259	229	346	71	200	530	562	171	293	796	572	82	51	35	50	26	63	73	115
CD1E	174	38	50	32	90	35	37	648	22	26	103	366	48	92	49	70	261	156	164	36	27	28	11	41	67	63	63	49	23	82	24	36	87	11	13	37	42	30	90	58	36	12	12	8	3	7	13	23	2
CD4	3	1	6	4	4	1	4	2	4	3	6	1	5	1	1	11	8	1	2	0	3	2296	2187	3788	2029	3616	4793	1397	1102	5731	2681	4651	4376	916	1753	5388	4524	2463	5099	2122	2855	602	659	440	160	297	722	743	225
CD8A	31	19	13	17	55	6	15	18	18	49	93	54	50	5	81	51	23	26	27	78	101	799	302	335	665	347	1636	436	117	926	933	530	499	99	351	503	294	523	4948	624	363	109	173	287	123	18	292	208	11
CD8B	3026	9021	2405	2031	4437	5125	4805	2240	4686	7720	3074	1732	6388	4865	3928	3005	7903	1702	2701	1369	4817	318	63	86	188	97	346	107	20	205	239	92	145	24	69	121	80	216	1010	1235	85	57	64	71	22	10	88	32	23
CD74	0	0	2	0	1	2	3	2	1	1	0	0	3	0	0	0	1	0	0	0	1	50051	47397	67717	53978	63291	171136	62146	22764	146485	63499	89838	83583	23051	36674	97213	92535	41294	199388	152896	53402	8330	24579	84376	10401	13866	23833	63427	12787
CREB1	1	0	0	2	0	0	0	0	0	1	0	0	0	0	0	0	1	0	0	0	0	1360	2056	1686	1286	1804	1441	1809	862	2494	1633	1745	1749	1815	1233	2342	1865	1664	1427	1623	1573	1229	1064	745	50	205	637	2366	1264
CTSB	0	0	0	0	0	0	0	0	0	0	0	0	0	0	0	0	0	0	0	0	0	35806	46076	34143	27793	29604	35838	26249	12383	43609	37224	34734	66288	26614	23565	57196	42994	22019	33085	46150	25512	33374	32071	21030	5101	19263	26598	41645	40607
CTSE	0	0	0	0	0	0	0	0	0	0	0	1	0	0	0	0	0	0	0	0	0	571	564	2269	3300	1596	1243	1335	497	978	1595	1419	693	142	1126	1199	775	1218	888	617	3274	76	93	4879	139	183	7338	7104	13420
CTSL	0	0	0	0	0	0	0	0	0	0	0	0	0	0	0	0	0	0	0	0	0	4302	4295	2811	1913	4544	2719	2694	1779	4716	3956	3166	5685	7993	2247	3709	3551	3797	2635	2096	2435	1084	1678	2735	299	606	1680	1663	1101
CTSS	0	0	0	1	0	0	1	0	0	0	0	1	0	0	0	0	0	0	0	0	0	16319	26170	23566	27546	36743	30077	17996	14359	32009	25070	21423	29375	2957	21934	34600	22404	14228	29600	10057	26579	11827	5086	4159	1808	3355	4087	14963	5429
FCER1G	1057	1144	1322	1267	1657	1270	1752	1488	1314	1699	922	666	1531	1614	1117	1403	764	1360	1578	1452	1559	1457	1294	1245	978	1197	1659	417	505	1544	985	1353	1868	407	584	1755	1327	725	1494	742	742	299	287	557	84	157	699	480	451
FCGRT	4	4	8	5	4	0	5	2	6	2	1	1	3	7	3	9	2	9	6	7	3	26227	21581	23936	22675	28814	15607	21570	10502	38572	38558	26798	11967	6031	20321	36960	34486	12617	24192	38715	21616	5476	19149	1706	3622	6528	3848	4283	5980
PDIA3	492	273	262	386	685	190	179	319	82	351	886	415	381	176	310	605	175	1023	245	446	614	13018	21957	15413	13322	27829	20796	17185	10765	26130	19329	17329	40753	9802	13556	22572	20267	16480	24292	22388	17179	6230	28739	18897	884	2365	11395	21846	41660
HFE	1	1	0	2	0	1	0	0	0	0	1	1	0	0	0	0	1	0	0	0	1	654	880	569	760	710	659	537	301	777	622	627	643	550	477	701	581	511	503	524	553	506	510	323	21	130	405	1070	611
HLA-A	10	7	6	1	4	7	6	7	2	16	4	13	8	13	10	10	5	1	8	8	8	53646	43323	79421	98984	94935	142048	107689	42639	163397	108573	48486	43609	25647	58353	120952	83065	60173	136439	99654	46309	37271	74933	78854	25337	29412	33327	94226	108688
HLA-B	0	0	0	0	0	0	0	0	0	0	0	0	0	0	0	0	0	0	0	0	0	62934	104407	92539	152831	119878	289872	121219	63864	217956	207244	111170	90716	29864	76307	161750	138468	70191	220865	106555	87046	69010	80968	115710	26457	40949	30674	100200	97218
HLA-C	0	0	0	0	0	0	0	0	0	0	0	0	0	0	0	0	0	0	0	0	0	67345	77357	82850	76017	125885	127954	80731	37637	143557	166879	94153	97507	31504	73927	72003	89030	63344	208890	110999	65826	43764	52752	76779	28494	25944	22591	90434	56895
HLA-DMA	0	0	0	0	0	0	0	0	0	0	0	0	0	0	0	0	0	0	0	0	0	2709	2141	2900	1763	2639	7684	2502	1087	4647	2450	3181	3285	1077	1491	3658	3055	1613	8200	5746	1846	773	844	4594	275	367	883	4744	936
HLA-DMB	0	0	0	0	0	0	0	0	0	0	0	0	0	0	0	0	0	0	0	0	0	3808	959	2327	1875	1569	5435	1270	725	3827	1471	2764	2746	571	1055	2985	2325	1102	5458	7596	1584	365	353	1634	115	173	441	1253	143
HLA-DOA	0	0	0	0	1	0	0	0	0	0	0	0	1	0	0	0	0	0	0	0	0	807	604	1097	884	1325	2428	750	461	2864	557	1646	1151	403	708	1801	1293	716	2031	843	862	120	164	333	29	74	229	277	65
HLA-DOB	11	8	13	20	9	13	15	12	11	15	13	2	14	28	20	2	5	5	15	14	20	160	77	122	122	104	509	145	71	689	77	282	264	16	151	185	285	100	170	39	135	31	35	70	12	3	30	38	51
HLA-DPA1	1	0	0	0	1	0	1	0	0	0	0	0	0	0	0	2	1	0	1	0	1	9524	4850	16716	11301	15576	21458	5872	4001	20261	7141	12731	15701	4600	6422	20562	17059	7287	23662	6896	6363	1423	1648	13195	863	960	3256	4296	880
HLA-DPB1	43	29	59	44	39	25	28	42	26	48	58	53	56	43	66	34	44	69	53	15	84	8017	3943	9188	7400	10456	15051	5259	2884	16229	8971	13702	10399	3660	4167	14907	12869	4833	17284	8643	6543	1447	2078	7622	1596	1344	2426	2092	989
HLA-DQA1	2	0	3	4	1	0	1	0	2	5	2	0	0	4	2	4	2	2	2	4	4	5393	1294	4299	4066	5549	6708	1088	2189	4894	4350	9156	7745	1330	3209	5469	5801	3065	10895	3459	4789	1010	930	1895	289	561	874	897	205
HLA-DQA2	25	129	70	63	84	162	231	166	142	312	47	44	229	93	125	29	140	63	105	40	99	273	278	1266	311	441	3552	1258	192	4853	370	1208	593	68	1	1531	1225	7	942	15	125	70	122	58	6	3	396	308	289
HLA-DQB1	0	0	0	0	0	0	0	0	0	0	0	1	0	0	0	0	0	0	0	0	0	7048	2729	7226	6067	3122	6722	1944	1565	5905	2735	2827	4673	825	4873	3221	7415	5072	11802	7600	5708	1806	361	8440	670	2221	999	559	358
HLA-DRA	0	0	0	0	0	0	1	0	0	0	0	0	0	0	0	0	1	1	0	0	0	37661	11960	26887	23510	22085	71457	13491	9329	52430	17603	29248	39063	8184	12952	33604	30087	14988	79019	88245	17282	4313	4788	32444	2291	2348	8688	21221	3285
HLA-DRB1	0	0	0	0	3	0	0	0	0	0	2	0	2	0	2	0	1	0	0	0	0	20737	8751	15980	15735	14561	27837	5936	5502	13938	12172	18563	21524	5971	12619	15313	13757	13436	41127	60965	11274	3432	4512	25364	2335	3538	3623	13401	1608
HLA-DRB5	4030	5698	5139	4256	5800	4386	5304	1499	4525	6544	3523	1363	6420	7316	4479	5114	4246	3279	3479	5101	5541	8008	4433	9800	6154	2164	8731	3209	896	8907	1656	2715	3402	989	7432	4504	4084	8633	11589	8575	1522	1259	501	12073	1009	1318	1439	2966	570
HLA-E	0	0	0	0	0	0	0	0	0	0	0	0	0	0	0	0	0	0	0	0	0	28725	41407	37195	40305	50193	77783	45301	18736	82433	61777	43821	45745	22643	27643	59381	44889	32192	89248	36340	33554	21490	26615	30374	8971	11986	13038	48788	26616
HLA-F	0	0	1	0	4	2	1	0	0	0	3	0	1	4	1	3	1	3	0	1	0	3789	6551	5239	7321	6299	16924	8906	2750	7576	13373	6499	5473	1217	2815	4023	5791	3122	20708	6882	5702	2818	4892	7249	3540	1403	1870	9520	4246
HLA-G	1	1	3	7	1	1	1	3	3	1	0	1	5	2	1	2	1	3	3	1	0	119	218	905	187	309	700	485	225	456	149	29	263	23	103	572	256	144	1220	410	107	112	59	620	390	19	477	270	351
MR1	915	986	893	914	651	757	1014	434	1403	1522	712	543	1141	1007	1138	733	1100	849	949	358	1306	735	1060	841	511	971	973	1058	351	1195	694	906	771	1285	507	1092	895	756	1168	817	560	419	496	299	102	187	247	1213	299
HSPA1A	2490	5489	3269	2231	3581	4591	5118	2256	3240	5637	2226	1596	5735	3823	3424	2848	4612	2361	2234	2961	3834	4505	1804	1728	970	3445	1590	2622	1556	5958	2944	2540	1548	4712	3020	3896	3666	3517	2350	1391	2096	1687	2062	311	118	367	3824	822	3726
HSPA1B	678	888	853	551	980	886	931	556	636	1147	769	475	1186	1017	653	787	660	657	568	1096	1015	3937	3626	2690	1902	6727	2769	3994	2106	7793	4923	4417	2530	3130	5005	6734	7150	3512	3876	1759	4744	3499	3820	2316	288	2380	11692	10198	6511
HSPA1L	1	1	2	0	2	0	2	1	0	1	1	0	0	1	1	2	1	2	0	4	2	69	105	97	81	114	66	84	36	135	106	108	87	165	63	134	126	128	96	79	95	70	28	11	22	13	30	74	61
HSPA2	312	242	340	348	454	296	419	424	223	309	391	341	514	301	277	295	209	424	388	253	482	1899	2358	2293	1477	1671	765	3915	971	2817	4683	2022	3169	13452	1428	2214	2243	6568	1401	3483	2315	551	481	181	187	169	477	376	550
HSPA4	161	188	188	203	215	113	136	55	184	150	203	45	171	185	137	323	129	168	100	183	256	5350	5741	4192	2914	8133	5307	4753	3585	8395	5764	5352	7285	4239	5340	7094	6169	4991	5076	5454	4316	4492	6643	3977	331	1775	3170	5507	6585
HSPA5	0	0	0	0	1	0	1	0	1	2	0	0	0	1	0	1	1	2	0	0	1	26191	26181	23405	10451	27930	22379	22146	14954	33668	27765	25459	65760	15710	17438	27944	33916	17762	27396	18024	20994	24429	36364	26487	2709	4861	25939	48969	47478
HSPA6	275	285	329	396	422	186	249	196	219	259	146	87	277	245	128	327	197	250	242	274	398	318	57	84	104	74	84	115	25	115	74	78	149	49	41	77	113	92	100	62	67	74	85	57	33	243	5602	352	80
HSPA8	24	10	7	17	25	6	14	69	7	9	42	13	22	8	12	11	17	43	19	13	14	103600	33000	46326	31888	63475	30477	37294	21762	75793	46391	43258	65750	30249	31381	65357	73079	35884	46344	56144	41819	58327	52575	67890	6030	23359	52233	40566	53537
HSP90AA1	0	0	0	0	0	0	0	0	0	0	0	0	0	0	0	0	0	0	0	0	0	54007	29023	25903	21573	44332	22717	31404	17771	53998	27140	28195	51413	26781	22479	44517	41528	34367	28701	29185	29834	56782	68450	9750	1910	6113	34477	41802	42482
HSP90AB1	3	6	5	1	3	2	4	1	5	1	2	2	2	1	2	4	2	0	3	0	2	26061	31422	23549	20063	39489	24107	35212	15257	54029	31784	32486	48159	31671	20195	45086	41480	31943	28195	30029	30847	60522	75781	45211	4830	24964	32706	51888	50710
ICAM1	0	0	1	0	0	0	0	0	0	0	0	0	0	0	0	0	1	0	0	0	0	570	2214	759	511	883	1326	850	430	2364	973	1063	2526	568	622	1149	1589	1800	1706	1812	1889	949	980	1650	296	407	1448	1470	380
IFNA1	2	2	2	2	1	1	2	0	3	3	3	1	0	2	0	6	3	0	1	2	2	0	0	0	0	0	0	0	0	0	0	0	0	0	0	0	0	0	0	1	0	0	0	0	0	0	0	0	0
IFNA2	0	0	1	1	0	0	1	0	0	0	1	0	1	1	1	1	2	0	0	0	1	0	0	0	0	0	0	0	0	0	0	0	0	2	0	0	0	0	0	0	0	0	0	0	0	0	0	0	0
IFNA4	0	0	0	0	0	0	0	0	0	0	0	0	0	0	0	0	0	0	0	0	0	0	0	0	0	0	0	0	0	0	0	0	0	0	0	0	0	0	0	0	0	0	0	0	0	0	0	0	0
IFNA5	2	10	4	4	6	4	7	5	3	12	5	2	11	4	4	4	2	6	1	8	9	1	0	0	0	0	0	0	0	0	1	0	0	0	0	0	0	0	1	0	0	0	0	0	0	0	0	0	0
IFNA6	1	11	9	4	10	5	9	5	7	6	1	1	6	8	5	3	5	1	4	4	9	0	0	0	0	0	0	0	0	0	0	0	0	0	0	0	0	0	0	0	0	0	0	0	0	0	0	0	0
IFNA7	77	77	257	81	179	56	150	51	44	133	39	27	91	110	87	91	37	69	76	18	54	0	0	0	0	0	0	0	0	0	0	0	0	0	0	0	0	0	0	0	0	0	0	0	0	0	0	0	0
IFNA8	0	1	0	0	0	0	1	0	0	1	2	0	0	0	1	1	0	0	0	1	0	0	0	0	0	0	0	0	0	0	0	0	0	0	0	0	0	0	0	0	0	0	0	0	0	0	0	0	0
IFNA10	5	1	8	3	6	2	4	1	2	6	2	1	3	3	1	12	0	8	1	4	7	0	0	0	0	0	0	0	0	0	0	0	0	0	0	0	0	0	0	0	0	0	0	0	0	0	0	0	0
IFNA13	3	0	3	0	0	1	2	0	0	0	2	3	3	0	0	3	0	3	1	4	3	0	0	0	0	0	0	0	0	0	0	0	1	0	0	0	0	0	0	0	0	0	0	0	0	0	0	0	0
IFNA14	812	1241	1209	1119	1272	1155	1459	732	1051	1489	836	564	1493	1313	1030	1157	888	925	1041	1003	1510	0	0	0	0	0	0	0	0	0	0	0	0	1	0	0	0	0	0	0	0	0	0	0	0	0	0	0	0
IFNA16	1	2	0	2	0	0	2	1	2	2	0	0	0	0	1	3	1	4	1	0	0	0	0	0	0	0	0	0	0	0	0	0	0	0	0	0	0	0	0	0	0	0	0	0	0	0	0	0	0
IFNA17	1	0	1	0	0	0	0	0	0	0	0	2	0	0	0	0	0	0	0	2	0	0	0	0	0	0	0	0	0	0	0	0	0	0	0	0	0	0	0	0	0	0	0	0	0	0	0	0	0
IFNA21	0	0	0	0	0	0	0	0	0	0	0	0	0	0	0	0	0	0	0	0	0	0	0	1	0	0	1	2	0	0	0	1	1	0	0	0	0	0	0	1	0	0	0	0	0	0	0	0	1
IFNG	0	0	0	0	0	0	0	0	0	0	0	0	0	0	0	0	0	0	0	0	0	2	4	2	7	10	48	5	2	13	6	2	2	0	0	3	2	2	77	1	0	6	5	15	0	0	10	5	0
KIR2DL1	1	1	1	2	6	2	1	0	4	1	1	0	0	1	1	5	2	4	0	3	3	0	2	0	0	1	2	0	1	0	0	1	2	0	5	4	0	0	1	0	1	0	0	0	0	0	0	0	0
KIR2DL3	216	70	67	138	248	28	48	371	31	65	267	346	129	63	74	200	155	372	146	25	149	7	0	1	0	6	2	1	1	3	0	2	0	1	1	6	0	5	3	1	1	0	1	0	0	1	1	0	0
KIR2DL4	2	1	3	2	3	2	3	4	5	1	2	3	2	2	4	7	0	7	0	5	4	87	86	75	92	105	128	79	27	118	99	50	45	5	22	140	68	14	113	163	40	4	24	1	2	1	24	31	2
KIR3DL1	0	0	0	0	0	0	0	0	0	0	0	0	0	0	0	0	0	0	0	0	0	2	0	2	3	0	6	1	1	6	1	2	2	0	2	1	1	3	6	0	0	0	2	1	0	0	1	2	0
KIR3DL2	0	0	0	0	0	0	0	0	0	0	0	0	0	0	0	0	0	0	0	0	0	11	2	3	2	15	24	5	1	21	2	5	5	0	2	14	4	3	8	1	0	1	0	1	0	0	0	1	0
KLRC1	0	0	0	0	0	0	0	0	0	0	0	0	0	0	0	0	0	0	0	0	0	91	79	14	33	37	42	17	14	50	47	46	42	2	14	112	21	8	36	25	32	11	7	0	3	0	7	24	7
KLRC2	6	82	23	12	11	15	49	22	19	33	8	15	54	17	87	7	113	4	19	32	43	61	10	15	31	5	1	19	7	60	0	3	6	2	4	40	12	18	29	12	3	50	9	2	0	1	5	23	3
KLRC3	808	1474	1206	1287	1531	848	1302	1438	969	1354	996	743	1350	1268	1047	939	1130	973	1441	1116	1191	6	4	1	6	4	7	0	0	4	1	2	3	0	1	9	6	1	7	3	0	6	1	0	0	0	0	2	0
KLRD1	0	2	0	1	1	1	0	3	0	1	0	0	0	0	0	0	0	0	1	1	0	221	143	133	199	215	367	228	58	422	190	173	102	32	128	260	114	134	774	84	54	27	76	95	2	8	89	73	106
LTA	1	0	0	0	1	1	0	0	0	0	4	0	0	1	0	0	0	0	0	0	0	18	12	12	24	18	105	35	12	266	9	55	110	4	18	32	68	48	46	19	45	15	13	12	3	2	14	17	5
CIITA	1154	1101	1182	1054	1658	791	984	754	925	1242	1263	739	1300	1263	867	1541	1009	1476	1040	1247	1523	243	840	1098	610	729	3302	1594	469	3347	626	1705	1138	310	710	1132	1462	603	4028	3772	960	99	302	738	122	67	217	1177	97
MICA	41	26	57	48	43	36	48	59	52	50	26	40	50	36	40	30	29	53	48	25	52	819	852	1088	835	631	688	901	325	1030	732	838	708	939	577	1135	950	580	616	973	650	506	666	511	100	271	636	1084	449
MICB	61	124	336	464	131	83	124	114	127	110	53	27	78	284	105	88	44	69	211	95	208	108	457	131	249	215	339	218	107	331	188	308	382	82	77	165	187	64	424	125	127	296	93	562	80	54	337	1321	145
NFYA	1002	1023	1100	994	1483	674	929	1022	688	1021	2075	833	1341	886	884	1511	857	1442	1072	1028	1264	846	1501	1443	914	1471	1128	1310	614	1970	1082	1388	1268	663	1142	2070	1821	1053	1071	964	1341	1009	1422	581	118	481	803	2938	1274
NFYB	753	833	1013	872	1410	957	1186	1472	785	1276	677	680	1201	1113	791	825	676	864	1136	951	1066	916	1094	848	774	1050	708	1211	588	1426	1169	965	1238	1271	543	1388	910	1327	749	1014	837	1346	1051	374	46	239	307	1072	1159
NFYC	0	0	0	0	0	0	0	0	0	0	0	0	0	0	0	0	0	0	0	0	0	2059	2841	2599	1855	3159	2466	2850	1259	3522	3128	2702	3047	2037	2029	4129	3234	2295	2727	2581	2943	1536	1455	1021	347	1017	998	3193	1933
LGMN	0	0	0	0	0	0	0	0	1	0	0	0	0	0	0	0	0	0	0	0	0	7682	10797	11942	6512	9545	9552	4850	2716	9833	10559	8984	8995	3608	7535	13283	10507	5884	8341	25420	8751	4231	3691	4224	1013	1821	3614	4455	3935
PSMB8	37	460	51	27	37	156	68	13	72	60	29	17	114	73	94	25	33	30	35	49	75	8557	6147	5269	9079	7470	10896	7959	2736	9716	8247	5843	9616	1995	3595	8469	6793	4067	11472	7209	4850	6549	7241	8161	2343	3143	3160	6486	6853
PSMC1	0	0	0	0	0	0	0	0	1	0	0	0	0	1	0	0	0	0	1	0	0	889	604	637	597	1032	781	663	381	1104	834	720	1236	720	612	1081	934	688	787	1193	744	673	806	296	71	84	268	579	527
PSMC2	0	0	1	0	0	0	0	0	0	1	1	1	2	0	0	0	0	2	1	1	2	3828	2707	2430	2252	3626	2986	2857	1509	3850	2770	2706	5597	2845	2373	4007	3166	2573	3056	3862	2359	3053	3825	2174	477	1206	1590	5129	4796
PSMC3	28	17	14	15	9	30766	139	2333	66	14	1	109	16558	25	10	1	42	142536	0	13	0	5423	4303	3366	3773	5461	4511	5468	1845	6276	5470	4225	8907	4724	3401	5875	4981	4457	4929	5607	4410	2704	6338	2983	1543	2139	2442	6662	5337
PSMC4	0	0	0	0	0	0	0	0	0	0	0	0	0	0	0	0	0	0	0	0	0	4543	3528	3380	2811	5242	4052	3937	1810	5512	4600	3845	8069	2527	3088	5388	4700	2741	4680	4464	3658	2233	4018	2546	1112	2428	2521	5446	4069
PSMC5	0	0	0	0	1	0	0	0	0	0	0	0	0	1	0	0	1	0	0	0	0	3789	4505	3891	2983	6171	4488	5787	2404	6910	5505	4345	8092	4750	3565	6381	5148	4455	4970	6143	4483	2641	7354	2789	1224	2155	1979	8798	5518
PSMC6	57	52	94	51	40	93	52	52	38	82	36	25	75	108	58	70	86	57	56	49	62	4533	2392	2468	2433	3277	2492	2396	1558	3487	2530	2244	4370	1804	2119	3582	2866	2411	2399	2990	2199	3705	2883	1557	59	370	1115	3595	3184
PSMD1	4824	5527	6797	4945	9234	6762	7624	5089	3922	7231	5207	3760	6995	7937	4269	5982	3631	5395	5121	4135	6506	4624	5007	3693	2669	8032	5281	4958	3672	6723	5443	4872	8914	4958	5813	6721	5900	4556	5791	6382	4356	3132	5164	3046	435	1161	2381	13534	7679
PSMD2	0	0	0	0	0	0	0	0	0	0	0	0	0	0	0	0	0	0	0	0	0	8223	8456	7869	6094	12571	9074	8777	3946	12085	10320	8751	15263	7662	7264	11765	10497	7504	9612	10973	8886	4524	7689	7176	1531	3988	5401	14875	6403
PSMD3	1	4	2	1	5	3	3	1	2	1	2	2	2	2	1	2	2	7	2	3	5	7241	7019	6275	5287	9555	7719	6767	3020	10497	8547	7483	11784	3843	6016	10938	8938	4903	8154	6546	6967	3995	9461	4787	1627	3312	3777	10584	5872
PSMD4	0	0	0	0	0	0	0	0	0	1	0	0	0	0	0	0	1	0	0	1	1	4650	4348	3665	3951	5361	4596	5200	2117	6633	5830	4518	7242	4919	3135	6267	5237	4661	4750	6638	4579	5190	6240	2840	1974	5002	2346	6752	6330
PSMD5	0	0	0	0	0	0	0	0	0	0	0	0	0	0	0	1	0	0	0	0	0	1684	1610	1215	886	2120	1372	1451	936	2492	1574	1429	1721	1694	1147	2455	1779	1539	1407	2144	1262	2252	1185	958	45	197	875	2057	1973
PSMD7	72	216	67	76	105	103	191	51	180	274	44	40	174	162	143	93	309	42	90	56	161	3920	2526	2507	2302	3157	2647	2617	1578	3360	3190	2410	4580	2847	2405	3615	3021	2541	2771	2878	3000	3101	4394	1527	593	819	1193	4695	3109
PSMD8	25	27	28	22	34	21	20	6	17	22	16	19	21	27	28	26	15	13	11	23	23	9707	5434	5539	5776	7270	5672	5884	2330	8422	7372	5608	9430	4700	4285	8768	7362	4749	6188	9318	5552	4601	5403	4787	1431	4953	4661	9054	6532
PSMD10	26	0	12	2	6	0	1	2	0	4	2	2	1	1	4	8	5	11	2	2	3	2681	1723	1643	1903	2167	1810	1567	837	2368	1923	1674	2385	1352	1136	2561	2178	1862	1591	2175	1436	2986	1267	1003	267	465	792	4416	1391
PSMD11	2	1	0	0	1	0	0	2	0	0	2	1	1	0	1	1	1	1	0	1	0	4603	4122	3439	2838	6496	4450	4344	3009	6117	4089	3854	6966	3552	5081	5838	5110	3343	4677	3974	3582	2594	5593	3232	333	678	1913	9002	4711
PSMD13	0	0	0	0	0	0	0	0	0	0	0	0	0	0	0	0	0	0	0	0	0	7367	4399	4544	4407	6549	4874	5058	2465	6939	5890	4277	8915	3536	3829	5862	5789	4034	5111	6641	4517	4182	7220	4076	914	2088	2900	3869	7296
PSME1	1	5	2	0	2	3	1	7	3	4	0	0	3	2	2	1	6	2	1	2	1	12328	8304	7576	9917	11510	15054	10497	4525	15529	11268	8790	14657	5514	6980	12942	10266	7158	15908	18258	7809	10290	12790	12939	1905	2328	4752	11100	8017
PSME2	3	1	1	4	6	0	7	2	0	0	5	1	0	0	2	6	1	7	1	1	1	7725	5481	4176	5391	7441	11652	9095	3164	8255	5715	4854	13947	2606	5149	6484	6112	4051	12536	16995	5090	8008	13362	7741	724	1078	2909	10312	8303
RELB	2	4	5	1	4	1	8	6	6	8	11	4	7	5	7	9	6	4	6	9	11	956	1478	1479	1001	2681	1850	1212	877	2996	2170	1834	1580	539	1921	2726	2342	937	2042	2844	1436	627	978	966	394	1450	1189	610	1150
RFX5	0	2	1	0	2	4	3	1	2	3	0	1	1	0	0	2	3	0	2	4	3	1070	2149	1342	1280	1638	2104	2132	722	2474	1590	1723	1877	2001	819	2081	1919	1615	2012	1640	1693	1349	2040	1094	124	253	680	2441	1173
RFXAP	0	0	0	0	0	0	0	0	0	0	0	0	0	0	0	0	0	0	0	0	0	219	170	210	126	191	167	194	121	228	205	188	187	270	113	273	175	291	155	206	232	676	149	63	35	42	75	363	141
SLC10A2	0	0	0	0	0	0	0	0	0	0	0	0	0	0	0	0	0	0	0	0	0	56	15	9	0	31	13	3	48	16	4	18	45	7	210	41	261	39	9	39695	13	0	0	0	0	5	2	0	0
TAP1	0	0	0	0	1	0	0	0	0	0	0	0	0	0	0	0	0	0	0	0	0	4665	7761	5507	6401	6710	17506	9306	2679	10870	9957	5605	7790	1891	3375	7718	6826	3297	18780	6220	5506	4502	10401	22571	2053	1863	3985	12875	5739
TAP2	773	1483	827	874	1213	721	1056	486	793	2074	616	389	1196	886	1177	1229	1150	885	1453	804	1748	661	1790	1189	1067	1388	2687	2637	778	2046	2113	1453	2270	672	1207	1744	1669	971	4364	2579	1264	1115	1722	3285	348	203	671	3195	854
TAPBP	417	389	793	342	989	398	510	317	266	521	505	205	622	634	306	743	372	621	378	669	444	4338	22237	10908	9179	20047	20691	22349	5931	24798	20996	15623	19423	6281	8896	17316	18720	8204	24992	16342	11608	6045	8652	3364	2882	5390	3148	5877	13074
THBS1	1041	2090	1645	1079	2220	1840	1914	1590	1207	2340	1241	959	2184	1806	1318	1335	1502	1213	1491	1442	1707	8006	37092	16107	8005	15363	4535	18037	14339	25751	20571	6743	11972	5194	13523	14965	26661	31446	8123	10232	33784	1346	13317	2409	689	2112	6684	3959	9780
SEM1	0	0	0	0	0	0	0	0	0	0	0	0	0	0	0	0	0	0	0	0	0	2954	2096	1833	2272	3482	2659	2970	1312	3689	2861	2143	3822	1877	2139	3494	2916	2476	2622	3408	2452	5496	8304	1248	572	1838	714	4855	9704
KLRC4	117	106	78	92	237	32	99	122	40	101	219	134	119	109	90	156	77	172	82	139	153	6	8	10	3	2	2	9	1	8	1	0	2	1	3	12	8	1	7	1	2	2	0	0	0	0	1	2	0
AP3B1	0	0	0	0	1	0	0	0	0	0	2	0	0	0	0	0	0	0	0	1	0	2343	4117	3051	2359	4990	3534	3070	1913	4691	3832	3552	5058	2089	3008	6142	4086	2810	3633	3760	3078	2749	2437	1415	146	402	1158	3018	3021
RFXANK	5	13	29	19	20	10	10	3	12	12	16	8	13	23	10	27	11	15	4	13	15	1948	1525	1274	1342	2014	1592	1974	652	2569	2011	1660	1388	1201	1274	2442	1945	1279	1637	1491	1527	1503	2289	699	485	1627	691	2263	1993
PSMD6	3	1	4	2	6	6	2	5	0	8	1	3	3	4	9	2	6	2	3	3	3	2934	2123	2323	1782	2855	2092	2276	1307	2944	2342	2069	3934	2194	1731	2866	2595	2036	2064	2632	2051	2621	2529	1811	232	562	1232	1277	2360
PSME3	0	1	0	0	0	0	0	0	0	1	1	0	0	0	0	1	0	1	0	1	0	5602	5214	4484	3323	7372	4719	5301	2827	7490	5644	4987	8326	3217	4165	7002	6096	4246	4808	5219	4790	4465	6864	3865	758	1249	3041	8565	5307
PSMD14	56	5	131	48	14	21	86	32	48	132	8	58	235	43	40	75	112	27	54	110	59	4096	1825	1664	1893	2527	1949	1851	1049	2395	1971	1710	4390	1485	1543	2852	2312	1730	2135	2086	1759	3294	3057	2371	343	857	1670	4230	4542
CLEC4M	0	0	0	1	0	0	0	0	1	0	0	0	2	2	0	0	0	0	1	0	1	2	59	1	0	3	19	7	4	47	0	11	9	9	6	15	6	6	4	8	27	0	0	0	0	0	0	1	1
IFI30	0	0	0	0	0	0	0	0	0	0	0	0	0	1	0	0	0	0	0	0	0	20	48	51	27	41	85	40	17	47	31	57	74	2	18	71	54	11	69	42	36	30	20	38	13	2	21	40	25
PROCR	408	637	693	624	722	271	820	322	364	778	464	329	617	629	1084	443	436	303	362	433	1040	1526	1349	815	946	1114	774	1421	362	1337	865	695	1524	1042	468	1188	1117	910	946	993	792	856	1665	1310	291	432	1654	1316	3418
ADRM1	0	0	0	0	0	0	0	0	0	0	0	0	0	0	0	0	0	0	0	0	0	4541	3486	3387	2943	4523	3887	4539	1712	5751	5566	3556	7319	2932	3244	5098	5406	2791	4596	4683	4082	3904	8009	2699	2927	4478	2724	6439	5347
TRPC4AP	0	0	0	0	0	0	0	0	0	0	0	0	0	0	0	0	0	0	0	0	0	4206	5209	5263	3622	6956	4983	5049	2360	7073	6034	5613	6084	3088	4210	7113	6098	3868	5428	5330	4845	5451	5089	2886	1609	4160	2546	5703	3519
CD209	0	0	0	0	1	0	0	0	0	0	0	0	0	0	0	0	0	1	0	1	0	893	1798	1871	651	1590	1925	334	504	2219	1242	1655	1697	245	895	2825	2121	853	2435	1351	1200	82	46	134	11	20	207	74	63
UBXN1	1	0	0	0	0	0	0	0	0	0	0	0	1	0	1	0	1	1	0	0	0	3356	3887	3252	3532	4568	4157	4557	1623	6874	5597	4242	4409	3637	2782	6148	4739	3686	3885	6526	3861	3042	5334	1852	1186	3743	1869	3510	4273
ERAP1	33	1	1	0	2	52	121	4	49	85	3	61	106	2	23	2	21	1	0	245	8	1930	5201	5774	3951	12469	5606	10050	2957	7455	6971	8463	7411	3273	4693	10542	7095	5429	9823	9211	4169	3601	3772	2518	238	336	1038	3116	3966
TAPBPL	3	0	2	0	0	2	0	1	0	0	4	0	0	1	0	3	2	1	0	4	3	2360	4366	3559	2937	5015	4991	3697	1964	5712	6165	4431	3485	1247	2753	6481	6529	2019	4367	3013	3518	2089	3178	774	880	1113	914	1602	1118
ERAP2	33	14	60	46	45	21	28	41	29	37	31	22	27	23	23	32	33	50	42	24	49	1863	3203	2185	3978	357	4343	525	1855	4247	2886	3142	4189	1548	3086	3769	3181	1934	5011	3916	2073	4547	247	170	144	44	2361	546	96
ULBP3	0	0	0	2	0	0	0	0	0	0	0	0	0	0	0	0	0	0	0	0	0	34	40	12	9	23	23	13	9	27	12	22	18	9	16	23	23	6	29	8	14	25	78	48	11	31	117	79	39
ULBP2	1	5	2	4	7	1	4	3	1	2	4	7	4	1	3	9	3	7	5	7	4	7	12	0	3	6	3	6	3	6	1	5	13	4	8	5	1	5	4	4	3	91	21	71	9	19	379	294	69
ULBP1	1	3	1	1	1	1	2	5	5	4	4	1	3	7	1	5	3	3	3	2	9	1	2	0	6	4	3	3	4	0	1	4	4	1	2	7	4	1	2	0	1	51	29	2	5	4	24	18	18
KIR3DL3	0	0	0	0	0	0	0	1	0	0	0	0	0	0	0	0	0	1	0	0	0	0	1	2	2	0	0	0	0	0	0	1	0	0	0	1	0	0	1	10	0	0	0	0	0	0	0	0	0
RAET1E	0	0	0	0	0	0	0	0	0	0	0	0	0	0	0	0	0	0	0	0	0	3	25	6	31	19	33	15	4	28	17	11	25	4	6	17	9	4	27	5	10	8	27	20	0	1	62	2	34
RAET1L	0	0	0	0	0	0	0	0	0	0	0	0	0	0	0	0	0	0	0	0	0	16	2	1	0	0	1	1	0	4	5	1	0	0	5	9	8	0	3	0	0	19	38	10	1	11	218	27	113
UBR1	0	0	0	0	1	0	0	0	0	1	1	0	0	0	2	0	0	0	0	1	1	974	2268	1637	912	2146	1589	1711	987	2501	1701	1796	1738	2172	1411	2456	1943	1430	1522	2162	1489	573	866	502	17	123	449	1089	770
RAET1G	4	7	10	10	25	4	2	7	6	3	12	12	9	6	5	9	16	5	8	15	15	7	16	6	11	8	5	9	1	17	8	9	13	11	2	17	13	9	5	6	10	16	16	8	0	39	22	8	31
PDIA2	0	1	4	0	2	1	1	2	3	1	2	0	2	4	1	1	1	0	2	4	3	12	50	31	31	20	36	43	11	22	18	47	39	5	15	43	27	21	45	196	19	5	58	16	45	44	30	88	61
HAMP	322	627	464	369	601	586	528	571	365	585	363	354	672	568	377	469	408	339	439	420	459	4	16	2	1	2	9	6	3	8	4	1	10	4	0	3	14	2	3	4	2	1	3	6	0	22	8	6	24
PI3	1	0	0	2	3	0	2	1	1	1	0	0	0	0	3	1	1	0	4	2	3	506	5308	1831	1296	668	2189	4961	241	4663	4479	1435	27504	199	228	524	2581	1283	1421	208	1215	265	212	26118	959	277	11827	168	15612
CAMP	443	786	696	606	758	484	801	350	591	823	502	274	835	861	561	642	666	510	584	655	860	4	9	4	2	14	15	10	6	32	7	8	3	1	7	11	41	14	12	2	10	1	3	1	0	2	0	0	0
DEFB4A	5031	7126	3437	1417	142	2686	132	25	3105	143	71	18	6665	3203	174	4630	148	2802	23	6577	7143	0	0	0	0	0	1	0	0	0	0	0	56	0	0	0	0	0	0	0	0	0	6	18	0	0	0	0	0
PPBP	0	0	0	0	0	0	0	10	0	0	0	0	0	0	1	0	0	1	0	2	1	3	3	2	3	42	0	8	1	3	1	0	7	5	0	3	4	17	5	6	3	3	23	15	2	4	49	52	96
REG3G	7366	41728	12499	5972	22030	51835	18694	13595	12723	31985	13790	8284	49511	36818	14397	21329	26505	15208	5793	23898	16114	2	2	0	0	5	0	1	8	0	0	2	4	0	0	0	0	0	0	52	0	22	0	3	20	0	1	0	1
CXCL14	1	0	2	0	2	3	1	0	0	0	0	0	3	2	0	0	0	0	0	1	1	9238	7888	15882	13442	14918	12576	10593	6317	14135	10374	12070	7800	645	5959	16918	15990	7842	17406	10357	11062	6514	3771	171	2351	2339	1400	892	18
CXCL16	2	2	7	2	4	0	2	2	2	3	0	0	2	2	6	2	1	2	7	2	4	1594	1939	2286	2286	2996	2535	2189	1044	4300	3161	2617	2666	735	1854	3361	2917	1301	3586	5431	2275	2041	1754	2771	970	929	4939	5094	6733
SLPI	104	23	2	45	286	10	4	173	3	8	322	144	49	31	16	63	39	373	126	5	18	1539	1736	1468	4804	1170	1258	2132	510	2751	2926	1081	3854	312	740	1009	1838	1307	820	231	2383	1649	464	2070	517	657	3296	2554	1966
CXCL8	0	0	0	0	0	0	0	0	0	0	0	0	1	0	0	0	0	0	0	0	0	361	28	57	231	5238	53	49	93	107	72	42	1670	31	77	14	613	260	138	413	1633	1820	572	2809	50	67	7365	1064	5601
CXCL10	2	0	0	1	3	0	0	0	0	0	3	0	0	0	0	0	0	0	0	7	4	567	106	107	167	192	323	286	76	277	92	82	468	53	109	138	207	41	986	90	82	263	512	1504	81	55	223	405	46
CXCL9	813	962	1435	1092	1495	781	1216	1047	717	1330	1273	809	1164	1197	901	1242	740	1129	951	968	1414	292	307	131	197	262	3719	559	154	860	225	298	514	61	270	194	358	158	3861	97	148	362	785	735	41	52	330	591	12
CXCL5	0	0	0	0	0	0	0	0	0	0	0	0	0	0	0	0	0	0	0	0	0	3	152	1	18	14	5	34	14	29	43	3	145	3	14	0	44	5	53	5	15	99	451	896	9	3	353	21	1305
CXCL11	0	0	1	0	0	0	0	0	1	0	0	0	1	1	1	0	0	1	0	0	0	53	14	11	26	36	79	96	17	54	41	16	49	23	28	21	27	11	338	14	12	47	719	549	90	48	42	334	582
CXCL6	0	0	1	0	1	0	0	0	0	1	0	0	1	0	0	3	0	0	0	1	1	48	25	10	9	14	15	20	87	31	21	28	41	5	8	14	28	12	25	71	10	120	94	38	8	0	20	68	85
CXCL1	33	32	46	23	50	15	58	12	36	54	34	22	55	36	36	34	21	43	22	58	77	178	473	258	632	316	857	285	337	832	335	212	4389	43	139	193	423	115	495	293	1301	3029	2165	1831	1024	619	2641	725	2805
CXCL12	0	0	0	0	1	0	0	0	0	0	0	0	0	0	0	0	0	0	0	1	0	4278	11565	5409	3470	5690	3784	6827	1416	8001	5230	5480	5935	11877	3690	7650	3683	8056	4704	5458	3283	624	412	169	33	65	359	26	658
CXCL13	840	1963	1702	843	1421	1585	1883	1245	833	1955	1246	605	1902	1968	1055	1201	1603	1154	1018	967	1351	124	12	272	260	116	4319	1871	465	8591	76	560	1534	56	901	774	1163	910	482	213	717	68	145	348	1	5	414	66	12
CXCL2	329	416	391	385	401	358	474	426	428	542	364	362	527	349	444	359	363	426	514	255	431	109	282	116	240	121	200	196	161	299	153	93	1649	86	51	99	167	305	170	848	965	895	1008	330	108	112	492	162	348
PF4	27	41	44	38	57	51	60	74	41	69	23	38	72	39	50	35	57	32	40	39	54	34	17	18	39	47	29	62	21	74	41	25	118	7	5	18	40	13	16	7	45	21	10	15	20	73	76	0	1
XCL1	0	0	0	0	0	0	0	0	0	0	0	0	0	0	0	0	0	0	0	1	0	46	16	30	19	37	68	15	14	24	75	31	23	16	27	88	45	19	159	42	12	3	3	12	8	0	4	2	1
CXCL3	0	0	0	0	0	0	0	0	0	0	0	0	0	0	0	0	0	0	0	0	0	94	256	110	496	219	497	275	146	576	203	184	1924	21	42	196	151	68	230	122	1143	1452	1268	904	553	310	1507	632	790
DEFB103B	0	1	0	2	1	1	1	1	0	0	1	1	2	2	0	1	0	1	3	2	1	0	0	0	0	0	0	0	0	0	0	0	0	0	0	0	0	0	0	0	0	0	0	0	0	0	0	0	0
CCL13	0	4	3	0	1	3	6	1	6	7	1	2	4	4	5	1	5	1	3	2	6	1763	872	698	165	463	639	401	646	342	1553	1112	650	71	543	1382	628	243	993	206	85	2	22	167	8	5	159	58	6
CCL1	3173	4832	3519	2693	4594	4193	4795	2846	5159	5607	2397	2229	5376	4925	3957	2980	4028	3035	3723	3632	4372	0	1	1	0	0	0	0	0	1	0	1	1	0	1	1	0	0	0	0	1	0	0	1	0	0	3	0	0
DEFB1	0	1	0	0	0	3	0	4	0	1	0	0	1	0	2	0	2	2	1	0	0	2275	200	457	359	751	337	277	497	1315	563	322	186	59	864	1356	547	594	731	584	413	176	57	38	23	5	87	124	247
CCL8	1178	5539	1774	1370	2475	4788	2856	2011	2211	4428	1290	951	4002	3634	2214	1494	5223	977	1428	1507	2242	1206	477	521	153	289	713	186	199	582	562	436	702	12	358	1182	919	248	542	112	282	8	11	135	4	8	75	13	24
ELANE	875	288	254	471	728	217	215	1612	180	231	1316	1043	627	323	419	1049	555	886	542	278	634	29	33	59	44	34	21	192	9	34	56	42	39	29	26	56	31	26	26	44	31	2	1	3	0	2	4	0	0
DEFB103A	0	1	0	1	0	0	0	0	0	0	1	0	0	0	0	0	0	0	0	0	0	0	0	0	0	0	0	0	0	0	0	0	0	0	0	0	0	0	0	0	0	0	0	0	0	0	0	0	0
DEFA3	0	0	0	0	2	0	1	1	0	0	1	1	0	0	0	2	0	2	0	0	0	0	0	0	0	3	0	0	0	1	1	0	0	0	0	0	1	1	5	0	0	0	4	0	0	0	0	0	2
DEFA1	0	0	0	0	0	0	0	0	0	0	0	1	0	0	0	0	0	0	0	1	0	0	0	0	0	0	0	0	0	0	0	0	0	0	0	0	0	0	0	0	0	0	0	0	0	0	0	0	0
TMSB10	1925	3286	2520	1311	3152	2955	2706	736	2430	3676	2407	710	3696	4174	2302	2490	2999	1769	1448	3461	3583	86504	43882	38955	49748	67481	53647	58967	18715	64218	50469	41364	60903	18332	29158	57754	55400	32222	54807	57308	44573	44895	83984	39814	18228	35183	35294	36172	115103
DEFA6	269	218	647	380	626	578	717	483	243	349	420	403	465	395	208	536	311	653	430	173	390	623	25	21	22	438	29	831	233	4	5	58	44	10	81	9	43	2	7	42309	5	2536	335	88	129	5	72	0	1774
DEFA5	0	0	0	0	0	0	0	0	0	0	0	0	0	0	0	0	0	0	0	0	0	1803	35	12	1	1946	68	3283	1024	43	7	451	86	57	180	13	153	1	26	129831	1	1326	297	261	52	0	275	0	6436
DEFA4	1	0	0	0	0	0	0	0	0	0	0	0	0	0	2	1	0	1	1	0	0	0	0	0	0	2	2	0	1	0	0	2	0	0	0	1	1	0	2	0	0	0	0	0	0	0	0	0	0
LCN2	347	216	196	238	171	100	241	146	200	229	309	274	220	198	290	256	173	368	228	246	381	728	11499	1230	3937	2938	27751	10918	5227	8338	5854	5570	31634	359	922	2401	2837	937	11066	253	6119	76974	13085	9978	7025	3164	6051	10709	45608
LCN1	523	678	662	688	1911	860	899	946	712	1031	619	375	1035	1103	507	972	426	763	934	1353	781	0	0	1	1	0	0	0	0	2	0	0	0	0	1	2	0	0	0	0	3	0	1	0	0	3	1	1	2
COLEC10	0	0	0	0	0	0	0	0	0	0	0	0	0	0	0	0	0	0	0	0	0	6	4	5	3	3	7	5	0	5	2	2	7	1	4	8	3	2	1	1	2	15	4	2	0	4	2	6	1
BPI	1122	808	1160	1201	1423	669	813	1222	1006	1170	1030	788	958	1356	788	1037	904	1330	1706	974	1138	4	2	1	7	9	4	16	4	6	6	6	25	15	9	11	2	20	12	7	11	18	5	3	1	5	6	2	2
S100A9	2	0	0	0	0	0	0	0	0	0	0	0	0	1	0	0	1	0	0	0	0	2907	3418	358	224	793	281	192	325	374	283	225	3231	203	511	319	859	3412	484	609	173	852	892	745	551	996	1023	221	1401
S100A8	0	1	0	0	0	0	0	0	0	0	0	0	0	0	0	0	0	0	0	0	0	888	596	65	30	357	78	82	159	156	91	43	916	92	191	72	311	1620	153	261	31	63	71	246	10	5	179	25	906
DCD	1	0	0	0	2	0	1	0	1	1	0	0	0	1	0	0	0	0	0	0	1	0	0	0	0	0	0	0	0	0	0	0	0	0	0	0	0	0	0	0	0	0	0	0	0	0	0	0	0
LCN6	0	0	0	0	0	0	0	0	0	0	0	0	0	0	0	0	0	0	0	0	0	101	21	15	14	9	19	48	1	17	6	18	109	4	11	3	23	25	29	25	16	0	3	0	0	0	3	1	0
S100A12	465	253	297	240	438	128	153	527	105	219	727	427	397	360	271	534	341	604	369	176	365	60	29	5	1	19	3	7	25	15	9	1	76	3	21	0	31	142	9	21	0	3	3	11	2	0	18	0	24
HTN3	1	0	0	0	0	0	0	0	0	0	0	0	0	0	0	0	0	0	0	0	0	0	0	0	0	0	0	0	0	0	0	0	0	0	1	0	0	0	0	0	0	0	0	0	0	0	0	0	0
LCN8	0	0	0	0	0	0	0	0	0	0	0	0	0	0	0	0	0	0	0	0	0	39	16	38	0	0	0	0	0	0	1	58	0	1	0	33	33	0	1	0	1	0	20	0	0	0	1	1	8
DEFA1B	14	12	16	18	28	13	21	46	37	31	6	12	28	22	33	20	15	18	14	16	28	0	0	0	0	0	0	0	0	0	0	0	0	0	0	0	0	0	0	0	0	0	0	0	0	0	0	0	0
CCR10	0	0	0	0	0	0	0	0	0	0	0	0	0	0	0	0	0	0	0	0	0	51	153	108	65	106	328	40	41	175	243	271	199	74	43	114	274	26	333	45	64	6	15	9	40	6	27	2	7
CELA1	33	35	62	148	37	29	95	28	83	95	22	29	66	37	103	60	27	54	93	33	99	3	1	4	1	0	4	1	1	6	2	3	2	0	0	3	3	5	2	1	3	1	0	0	0	0	0	1	0
DEFB106A	0	0	0	0	0	0	0	0	0	0	0	0	0	0	0	0	0	0	0	0	0	0	0	0	0	0	0	0	0	0	0	0	0	0	0	0	0	0	0	0	0	0	0	0	0	0	0	0	0
PENK	0	0	0	0	0	0	0	0	0	0	1	0	0	0	1	0	0	0	0	0	0	77	5	5	6	51	3	47	79	4	474	1	338	1214	8	6	9	871	8	478	9	0	1	0	0	4	28	2	4
BPIFC	3318	4355	4924	3665	6095	4810	4850	2693	3948	5664	2651	1989	5844	6056	4347	4331	3039	3832	3692	4341	4308	0	0	0	0	1	0	0	0	4	2	0	0	0	0	0	1	1	0	3	2	0	0	1	0	0	0	0	0
MMP12	0	0	0	0	0	0	0	0	0	0	0	0	2	0	0	0	0	0	0	0	0	1291	440	604	1053	172	482	260	566	865	749	1633	10153	25	455	563	919	417	654	155	999	1786	659	507	56	225	2694	1674	164
BPIFB6	1	6	3	1	2	5	3	2	1	5	5	2	3	2	4	7	1	7	3	5	9	0	0	0	0	0	0	0	0	0	0	0	0	0	0	0	0	0	0	0	0	0	0	0	0	0	0	0	0
LEAP2	14	44	43	21	21	55	50	21	42	49	15	7	54	94	15	39	43	58	33	33	41	61	140	288	235	684	75	138	130	320	75	237	49	28	228	130	329	180	56	1476	148	40	62	16	2	22	26	105	47
SFTPD	0	0	0	0	0	0	0	1	0	1	0	0	0	1	0	0	0	0	1	0	0	9	17	11	5	9	7	32	4	9	13	15	17	69	8	18	11	19	14	17	16	1	6	0	0	0	2	3	1
LCN9	3	3	3	0	1	0	7	2	1	0	5	3	0	4	2	2	3	1	0	3	4	0	0	0	0	0	0	0	0	0	0	0	0	0	0	1	0	0	0	0	0	0	0	0	0	0	0	0	0
BPIFB2	1586	1735	2504	1731	4070	2885	3478	1995	1773	2673	1136	1002	2451	3285	1437	2252	1067	2122	2160	1834	2387	0	0	0	0	1	2	0	0	0	0	0	0	1	0	0	0	0	0	0	0	2	0	0	7	0	2	1	0
PTGDS	48	33	43	50	29	19	65	13	81	137	29	14	90	29	101	45	43	13	51	47	104	1334	1301	359	539	1528	3184	3655	656	7316	738	2327	1750	888	1517	2576	2856	1605	2120	807	1102	172	766	153	237	103	834	37	384
TMSB4X	0	0	0	0	0	0	0	0	0	1	0	0	0	0	0	0	0	0	0	0	0	131516	76420	72014	79419	107104	117217	65433	39873	133777	104110	83164	104571	25435	75019	142189	98772	69032	90475	73629	58554	77145	86855	24565	23134	23960	27254	62893	84256
PGLYRP1	1123	1234	1867	1254	1577	954	1554	1304	756	1657	1242	1036	1478	1226	1118	1346	1042	1773	1212	1041	1436	18	10	7	2	9	9	3	5	3	2	13	1	2	6	15	12	32	15	7	5	0	3	3	0	1	4	2	1
ZC3HAV1	31	28	50	69	34	26	46	76	40	48	25	30	36	36	38	35	23	48	57	19	38	1300	3916	2650	1593	3790	3399	3145	1548	4450	3325	3250	2621	2784	2836	4983	3779	2840	3285	3226	2899	1982	1985	1188	144	329	810	2620	1931
TMSB15A	83	112	263	195	161	84	91	46	53	102	108	80	63	149	98	158	58	114	145	87	179	12	14	9	15	10	11	15	4	22	16	9	10	3	8	11	16	16	6	5	6	5	10	2	3	1	9	31	6
S100B	2643	4452	3662	3449	3723	3469	6140	1443	3294	6388	2751	1863	5655	4246	4409	3696	3289	2559	2502	3222	4984	705	338	287	211	493	197	681	129	417	504	185	509	1798	166	433	250	952	539	1085	216	141	77	28	60	10	84	40	15
S100A13	0	0	0	0	0	0	0	0	0	0	0	1	0	0	1	1	0	1	0	0	0	1691	1011	1055	915	1206	837	1206	455	1473	1198	774	1755	1214	704	911	879	1498	732	1092	1096	489	1491	695	277	269	723	1196	1524
S100A6	1490	2155	1642	426	410	3090	3868	1187	2220	2337	405	725	6323	1768	1022	526	1076	3146	1186	1029	1858	96713	45755	57220	63958	93735	64051	57094	27107	90679	80250	57722	152373	37828	52829	82246	69271	46532	65058	66908	54132	49806	68627	123430	23291	19426	70406	74418	138023
DEFB119	2962	6456	2798	2535	3756	5513	3792	5337	6579	6410	2438	2143	4511	6247	4314	3222	3523	2210	5320	3343	1927	0	0	0	1	0	0	0	0	0	0	0	0	0	0	0	0	0	0	0	0	0	0	0	0	0	0	0	0
DEFB107A	0	0	1	0	0	0	0	1	0	0	0	0	0	0	0	0	0	0	0	1	0	0	0	0	0	0	0	0	0	0	0	0	0	0	0	0	0	0	0	0	0	0	0	0	0	0	0	0	0
DEFB105A	36	23	54	50	39	22	59	26	37	49	30	20	46	45	36	42	16	26	55	37	58	0	0	0	0	0	0	0	0	0	0	0	0	0	0	0	0	0	0	0	0	0	0	0	0	0	0	0	0
SERPIND1	0	0	0	0	0	0	4	0	0	0	0	0	1	1	1	0	1	0	0	0	1	3	9	1	2	10	5	7	1	8	7	2	3	3	7	9	2	5	1	3	8	112	2	2	4	1	12	3	1
DEFB129	42	1353	234	137	334	156	1689	36	624	1787	112	1431	1005	523	1093	26	3062	1141	64	115	399	0	0	0	0	0	0	0	0	0	0	0	0	0	0	0	0	0	0	0	0	0	0	0	0	0	0	0	0
DEFB127	0	0	0	0	0	0	1	0	0	0	0	0	0	0	0	0	0	0	0	0	0	0	0	0	0	0	0	0	0	0	0	0	0	0	0	0	0	0	0	0	0	0	0	0	0	0	0	0	0
S100P	15401	29551	19452	16051	24226	22030	25047	14213	19125	28939	15984	12099	29746	23179	21096	18800	21879	15715	17275	16601	24623	1111	548	1860	5507	797	2404	464	211	825	1222	884	9299	95	555	1002	618	587	1744	279	1906	11712	7630	16025	2529	3152	10662	7042	14935
S100A7	4	0	6	6	6	1	9	3	4	8	3	2	1	3	3	0	3	4	4	0	2	0	0	0	0	0	0	2	0	0	0	0	2	2	0	0	0	0	0	1	0	4	0	3	1	0	2	0	27
DEFB104A	3	2	0	6	5	3	3	13	2	4	3	2	4	4	0	0	0	3	7	1	0	0	0	0	0	0	0	0	0	0	0	0	0	0	0	0	0	0	0	0	0	0	0	0	0	0	0	0	0
DEFB126	10768	16906	12237	10618	17766	21925	19201	29151	14128	19644	12120	10516	29140	17748	14374	13997	12879	17060	11875	15725	18073	0	0	0	0	1	0	0	1	0	0	1	0	0	0	0	0	0	6	0	0	0	0	0	0	0	0	0	0
DEFB106B	0	0	0	0	0	0	0	0	0	0	0	0	0	0	0	0	0	0	0	0	0	0	0	0	0	0	0	0	0	0	0	0	0	0	0	0	0	0	0	0	0	0	0	0	0	0	0	0	0
DEFB104B	0	0	0	0	0	0	0	0	0	0	0	0	0	0	0	0	0	0	0	0	0	0	0	0	0	0	0	0	0	0	0	0	0	0	0	0	0	0	0	0	0	0	0	0	0	0	0	0	0
DEFB107B	0	0	0	0	0	0	0	0	0	0	0	0	0	0	0	0	0	0	0	0	0	0	0	0	0	0	0	0	0	0	0	0	0	0	0	0	0	0	0	0	0	0	0	0	0	0	0	0	0
PGLYRP3	0	1	0	0	0	0	0	0	0	0	0	0	0	0	0	0	0	0	0	0	0	0	1	0	0	0	0	0	0	0	0	2	0	0	0	1	0	0	1	0	2	0	1	0	0	3	2	0	37
PGLYRP2	0	0	2	0	2	0	0	1	0	0	0	0	1	1	0	1	0	2	0	0	2	9	4	8	5	10	10	1	0	12	7	12	4	0	2	8	18	1	13	3	2	2	3	1	5	0	2	0	1
S100A10	1	0	0	0	3	0	0	0	0	1	0	0	0	0	0	0	0	2	0	0	0	22442	15483	25843	31095	31674	17076	20130	12037	43758	36055	19679	35232	7743	23015	33941	29942	18857	21491	25724	32958	13892	22491	15939	2402	2990	24204	30257	32474
S100A2	1469	1868	1847	1500	2742	2199	2305	2566	1978	2736	1526	1086	2544	2549	1641	1843	1487	1514	2301	2069	1847	39	21	26	18	39	22	28	20	23	34	15	93	32	36	25	18	19	15	22	25	101	182	684	127	212	222	574	132
DEFB125	417	541	648	989	191	193	677	371	666	372	110	323	541	223	513	267	378	376	527	260	649	0	0	0	0	0	0	0	0	0	1	0	0	0	0	0	0	0	0	0	0	0	0	0	0	0	0	0	0
DEFB123	0	1	2	0	2	0	0	0	2	2	0	0	0	1	0	2	1	0	0	1	1	0	0	0	0	0	0	0	0	0	0	0	0	0	0	0	0	0	0	0	0	0	0	0	0	0	0	0	0
DEFB132	1568	1389	1789	1519	1954	1053	2238	1233	1978	2280	1625	1466	2064	1858	2079	1765	1225	1652	2121	1281	2574	0	0	0	0	0	0	1	0	0	0	1	0	1	0	0	0	0	0	9	0	0	0	0	0	0	0	0	0
BPIFB3	0	0	0	0	0	0	0	0	0	0	0	0	0	0	0	0	0	0	0	0	0	0	0	0	0	0	0	0	0	0	0	0	0	0	0	0	0	0	0	1	0	0	0	0	0	0	0	0	0
LCN12	0	0	0	0	0	0	0	0	0	0	0	0	0	0	0	0	0	0	0	0	0	28	58	105	20	23	50	97	26	50	24	53	20	5	55	53	60	16	32	25	181	169	243	8	63	94	14	193	44
PGLYRP4	0	0	0	0	0	0	0	0	1	0	0	0	0	0	0	0	0	1	0	0	0	2	0	1	4	0	2	13	0	2	2	3	0	1	1	1	1	0	1	9	7	1	5	0	0	2	0	1	11
S100A11	0	0	0	0	0	0	0	0	0	0	1	0	0	0	0	0	0	0	0	0	0	6293	5453	3922	4846	4738	4603	5199	1983	5976	4780	4109	13570	6330	2711	5021	5443	3618	4428	5020	4114	18336	12077	12603	4788	16716	11313	34347	35433
S100A5	0	0	0	0	0	0	0	0	0	0	0	0	0	0	0	0	0	0	0	0	0	5	10	6	3	9	1	16	3	13	5	5	10	14	3	11	8	1	4	15	6	23	11	35	2	2	17	220	32
S100A3	0	4	2	0	2	0	0	0	1	4	1	3	3	1	0	1	1	0	1	3	4	23	31	21	20	15	23	40	1	38	26	9	90	30	10	5	19	14	30	17	10	40	30	485	15	17	227	35	42
S100A1	1	0	0	1	0	0	1	0	0	1	1	0	0	1	2	0	0	1	0	0	2	38	53	66	24	79	45	85	19	64	50	51	91	86	24	63	55	92	79	83	61	10	44	12	7	42	13	153	13
DEFB128	303	233	456	390	348	125	196	236	211	266	337	310	360	174	309	365	221	381	387	169	378	0	0	0	0	0	0	0	0	0	0	0	0	0	0	0	0	0	0	0	0	0	0	0	0	0	0	0	0
DEFB108B	0	0	0	1	0	0	0	0	0	0	0	0	0	1	0	0	0	0	0	0	0	0	1	1	0	0	0	0	0	0	0	0	0	0	0	0	0	0	0	0	0	0	0	0	0	0	0	0	0
HTN1	0	0	0	0	0	0	0	0	0	0	0	0	0	0	0	0	0	0	0	0	0	0	0	0	0	0	0	0	0	0	0	0	1	0	0	0	0	0	0	0	0	6	0	0	0	0	0	4	0
LMBR1L	0	0	0	0	0	0	0	0	0	0	1	0	0	0	0	0	0	0	0	0	0	1142	1328	1844	1027	1683	1323	1542	716	1991	1248	1378	1013	892	834	1511	1753	919	1028	2466	1453	674	1191	423	346	1006	617	866	768
S100A7A	0	0	0	0	0	0	0	0	0	0	0	0	0	0	0	0	0	0	0	0	0	0	0	0	0	0	0	0	0	0	0	0	0	0	0	0	0	0	0	0	0	0	0	0	0	0	0	0	0
DEFB118	2380	4327	3274	2981	3029	2809	4314	2021	4149	4358	2126	1891	4379	3691	4617	2676	3810	3050	4082	2999	4366	0	0	0	0	0	0	0	0	0	0	0	0	0	1	0	0	0	0	0	0	0	0	0	0	0	0	0	0
COLEC12	5	13	12	5	5	1	2	0	1	9	1	1	1	1	0	3	5	3	3	1	4	427	2551	974	466	970	658	817	355	1599	958	1343	1424	1697	628	1688	825	1117	1033	630	690	29	91	39	4	38	189	236	81
TMSB4Y	0	0	0	0	0	2	1	0	0	0	0	0	2	0	0	1	0	0	0	1	0	555	303	323	5	1	404	4	225	557	276	4	434	123	3	524	332	201	3	1	3	118	227	0	1	41	0	3	9
DEFB134	39	31	38	22	34	34	27	19	48	41	16	22	81	15	63	30	56	87	20	29	58	0	0	0	0	1	0	0	1	0	0	0	0	0	0	0	0	1	0	0	0	0	0	0	0	0	0	1	0
DEFB124	0	0	0	0	0	0	0	0	0	0	0	0	0	0	0	0	0	0	0	0	0	0	5	5	1	2	1	5	0	1	1	0	1	8	0	0	1	5	0	2	5	0	0	0	0	0	0	0	0
DEFB121	1	0	3	2	0	0	1	0	0	0	2	0	1	0	0	0	0	0	0	0	0	0	0	0	0	0	0	0	0	0	0	0	0	0	0	0	0	0	0	0	0	0	0	0	0	0	0	0	0
DEFB116	1075	1282	1438	1697	1980	1146	1400	2903	1111	1635	1275	1296	1565	1322	1239	1153	1153	1472	2343	1167	1401	0	0	0	0	0	0	0	0	0	0	0	0	0	0	0	0	0	0	0	0	0	0	0	0	0	0	0	0
DEFB115	0	0	0	0	0	0	1	1	0	0	0	1	0	0	0	1	0	0	0	0	0	0	0	0	0	0	0	0	0	0	0	0	0	0	0	0	0	0	0	0	0	0	0	0	0	0	0	0	0
DEFB114	0	0	2	4	3	0	0	16	0	1	0	0	1	2	0	0	0	3	0	1	0	0	0	0	0	0	0	0	0	0	0	0	0	0	0	0	0	0	0	0	0	0	0	0	0	0	0	0	0
DEFB113	0	0	1	0	2	0	0	0	0	1	0	0	2	0	0	1	0	0	0	0	0	0	0	0	0	0	0	0	0	0	0	0	0	0	0	0	0	0	0	0	0	0	0	0	0	0	0	0	0
DEFB112	5661	24719	16138	10874	13147	8568	14114	4153	10039	18801	5063	3495	15896	20643	11841	8633	18324	4950	10642	6806	15113	0	0	0	0	0	0	0	0	0	0	0	0	0	0	0	0	0	0	0	0	0	0	0	0	0	0	0	0
DEFB110	0	0	0	0	0	0	0	0	0	0	0	0	0	0	0	0	0	0	0	0	0	0	0	0	0	0	0	0	0	0	0	0	0	0	0	0	0	0	0	0	0	0	0	0	0	0	0	0	0
TMSB15B	1	5	2.5	2.5	2.5	0.5	4.5	2.5	5	4.5	2	1	3.5	5	3.5	4	3.5	0	3	2	7	6.5	6	4	4.5	6	3.5	7.5	2.5	11	4.5	9	6	6.5	1.5	10.5	8.5	5	8	2	1	13	12	0.5	0	1	2	13.5	1
DEFB133	2	0	0	2	2	0	1	4	1	2	1	1	0	0	1	0	0	3	2	1	0	0	0	0	0	0	0	0	0	0	0	0	0	0	0	0	0	0	0	0	0	0	0	0	0	0	0	0	0
S100Z	4615	4407	6250	4722	10586	6733	6751	6566	4893	7447	4864	3562	6625	7326	4703	5621	3583	5529	5531	6037	5445	8	2	11	8	7	19	2	3	15	2	16	10	2	5	6	11	3	8	8	2	1	2	0	0	0	1	2	2
MAVS	0	1	2	2	0	0	2	1	2	1	5	0	2	2	0	2	0	2	1	3	2	5205	10979	10692	4601	14758	8831	10709	5620	13346	11364	11569	8884	4914	12123	18267	13315	6531	10150	5953	12795	5559	4873	1812	1148	2702	2005	4802	3347
S100A14	6	3	13	13	18	1	1	1	3	7	0	4	6	7	4	2	4	13	8	9	13	18484	10967	9019	12342	17858	13376	12938	6907	13346	13602	10890	19001	2189	15818	18311	14468	8636	12380	28388	11163	4206	7431	9602	1056	1314	8446	6428	32065
LCN10	1	0	0	0	0	0	0	1	0	0	0	0	0	0	0	0	0	1	1	0	0	14	12	24	6	2	9	52	3	26	4	17	28	7	13	8	31	7	25	47	9	0	4	0	0	0	0	0	0
S100A16	2194	2664	2244	3009	3466	2521	3244	3927	2040	3350	2521	2551	3566	2291	2453	2275	2195	2687	3682	2267	3182	13956	8309	6833	6976	11686	9769	9769	3953	10024	9174	7302	17221	2781	9084	10311	11001	5157	8824	12708	7706	4086	4622	15324	1619	3887	12310	8594	17875
DEFB136	3112	2583	3582	2330	5432	3849	4187	7439	2409	3894	1838	2702	4278	3221	2284	2040	2512	3400	3508	3089	3568	0	0	0	0	0	0	0	0	0	0	0	0	0	0	0	0	0	0	0	0	0	0	0	0	0	0	0	0
DEFB135	1	0	0	1	0	0	0	1	0	0	0	0	3	0	0	0	0	1	0	0	0	0	0	0	0	0	0	0	0	0	0	0	0	0	0	0	0	0	0	0	0	0	0	0	0	0	0	0	0
ZC3HAV1L	53	276	6766	4055	324	136	216	50	303	263	542	81	180	5863	15	1637	881	122	2468	210	2151	59	170	135	74	92	71	113	30	100	76	96	80	104	44	129	95	43	72	43	84	183	201	133	100	212	131	355	129
S100A7L2	2	7	5	2	8	0	7	4	2	6	4	4	2	1	10	1	10	16	2	2	5	0	0	0	0	0	0	0	0	0	0	0	0	0	0	0	0	0	0	0	0	0	0	0	0	0	0	0	0
DEFB4B	0	0	0	0	0	0	0	0	0	0	0	0	0	0	0	0	0	0	0	0	0	0	0	0	0	0	0	0	0	0	0	0	0	0	0	0	0	0	0	0	0	0	0	0	0	0	0	0	0
BPIFB4	0	0	0	0	0	0	0	0	0	0	0	0	0	0	0	0	0	0	0	0	0	1	0	0	0	0	0	1	1	0	0	0	0	1	0	0	0	0	0	0	1	1	0	1	0	0	0	0	0
IFNAR1	818	1770	1073	929	607	969	1548	565	1036	1600	594	475	1436	941	1439	1266	604	960	1139	442	1396	2366	4695	3164	2841	5213	3710	3122	2221	6443	4212	3746	3705	2194	2971	6330	4362	3305	3593	5040	3010	3029	1106	1067	195	540	1149	4134	2733
AZU1	8508	11468	11837	9042	13054	11438	14048	5897	10868	16716	11437	7753	15603	13145	13210	10119	13220	12301	8185	8851	17500	8	2	12	3	1	4	2	0	7	5	4	3	0	2	8	3	3	5	2	5	0	1	1	0	1	2	0	0
S100G	360	56	381	383	72	392	1295	98	466	684	73	211	513	363	558	217	4055	53	101	321	599	0	0	0	0	0	0	0	0	0	0	0	0	0	0	0	1	0	0	0	0	1	0	1	0	0	0	1	0
TCHHL1	75	32	37	11	94	26	23	77	6	67	125	87	63	47	47	92	65	112	31	54	41	0	0	0	0	0	0	0	0	0	0	0	0	0	0	0	0	0	0	0	0	1	0	0	0	0	0	0	0
TINAGL1	0	0	0	0	0	0	0	0	0	1	1	0	0	0	0	0	0	0	0	0	0	5770	6165	6834	5863	7378	4672	5530	3265	7605	7388	6476	4208	5327	7860	7713	6809	4398	4904	8369	7681	4887	2793	6498	1365	3651	7890	9837	2061
IFNGR1	0	0	0	0	0	0	0	0	0	0	0	0	0	0	0	0	0	0	0	0	0	9276	4666	5645	5561	7560	6084	4007	4383	9534	6265	4921	8995	2189	6931	8258	6861	5103	5378	11265	5347	3157	2951	2266	410	503	2942	4172	7180
SLC22A17	0	0	0	0	0	0	0	0	0	0	0	0	0	0	0	0	0	1	0	0	0	285	653	568	218	774	307	1378	229	917	854	591	799	2334	309	600	488	1292	846	1304	423	70	161	53	21	164	205	131	115
WFIKKN1	2401	1442	1790	1636	3019	1336	1861	3332	939	2278	3230	2840	2496	1358	1789	2147	1452	3769	1950	1673	2545	29	54	55	17	49	23	91	19	84	43	85	13	15	146	77	62	51	65	67	61	24	39	9	9	58	14	84	7
WFDC2	0	0	0	0	0	0	0	0	0	0	0	0	0	0	0	0	0	0	0	0	0	378	1002	6618	9819	523	1139	810	277	1193	4740	2525	3251	1891	655	3216	2274	1055	930	252	3883	331	3215	604	518	443	801	108	545
IL6	0	0	0	0	0	0	0	0	0	0	0	0	0	0	0	0	0	0	0	0	0	399	139	15	8	6	9	93	197	44	54	12	175	41	19	7	153	678	13	708	313	48	79	333	15	8	76	8	173
UMODL1	840	1090	1257	843	1540	1085	1324	698	1021	1509	877	582	1360	1410	1026	1123	890	1046	827	1194	1302	10	14	42	23	29	13	22	10	19	28	38	15	6	15	52	61	17	19	80	36	25	18	2	19	10	3	14	4
TGFB1	48	44	42	69	45	8	38	104	13	30	79	125	37	22	49	71	32	454	61	35	46	1004	2321	1682	1127	1897	2560	1735	516	3836	2586	2661	2494	2030	973	2134	2466	1445	3428	1569	1381	403	957	1163	409	1213	4207	1306	1006
PF4V1	0	1	0	2	0	0	1	0	1	2	0	0	1	0	2	0	0	0	0	2	0	2	2	2	3	6	2	0	0	13	3	2	2	1	2	2	3	3	0	11	1	7	3	1	0	0	2	2	0
MMP9	1	3	1	2	4	1	1	7	0	1	3	0	2	1	1	2	3	12	0	0	2	289	332	497	414	1752	1575	742	482	2772	86	2125	7187	33	688	928	1180	926	3029	499	716	428	1057	416	445	1134	1583	129	1056
ANOS1	3305	5695	4158	3369	3560	5663	6090	2903	5419	6601	2521	2006	6819	6552	5602	3851	4140	2947	4285	3909	5712	49	31	27	25	72	42	43	18	65	64	70	57	56	28	74	49	75	28	65	65	63	240	77	12	34	141	677	109
TLR4	0	2	1	0	1	3	1	0	0	0	1	0	4	2	0	0	1	1	0	0	3	1439	713	1045	711	1337	1040	492	688	1439	944	1194	1124	409	1489	1439	1542	864	1114	564	729	1195	376	325	57	492	291	121	87
SPAG11B	552	1085	1102	1008	1153	277	1474	407	1589	1163	379	527	1031	1450	1373	681	1513	365	1051	1607	1429	0	0	0	0	0	0	0	0	0	0	0	0	0	0	0	0	0	0	0	0	0	0	0	0	0	0	0	0
A2M	1698	2585	2898	2256	2982	2599	2948	1102	2377	3379	1610	1036	3438	2980	2637	2108	1944	1770	2064	2237	3719	15219	52271	29941	11447	36922	17202	31805	11815	43188	31626	38721	34085	38316	15388	44776	37577	29431	36127	22337	22198	5934	7230	2191	460	2838	6271	6192	4167
NFKB1	0	0	0	0	0	0	0	0	0	0	0	0	0	0	0	0	0	0	0	0	0	2225	4833	3672	2549	5243	3584	3964	2010	6362	4451	4712	4682	2697	2939	7118	6005	3144	3927	3020	4122	3183	2868	1596	442	1164	1993	3448	2162
APOBEC3G	479	4226	1035	1304	1045	996	1451	512	1142	1859	328	695	1347	1012	2138	437	794	613	1016	560	862	459	299	308	468	348	978	411	130	890	372	515	652	398	186	432	402	399	754	200	253	106	182	1111	48	57	191	225	35
FABP6	1	1	1	0	1	0	1	0	0	0	2	0	1	0	1	1	0	0	0	0	1	14	4	8	10	92	5	21	96	3	12	6	6	7	3	6	6	5	10	92956	8	505	863	90	289	799	34	120	432
NOD2	8	7	9	5	13	9	2	3	4	7	3	1	6	5	6	10	3	9	12	11	7	45	118	126	99	147	347	72	55	169	84	230	230	50	44	123	179	73	192	41	86	96	126	73	27	38	115	75	188
MBL2	647	1212	968	674	1129	2492	1101	2122	627	1346	793	650	1724	1380	807	846	1253	1349	878	879	1081	0	0	0	2	0	0	3	0	0	0	1	0	0	0	0	0	0	0	0	0	0	0	4	0	0	3	0	0
SFTPA1	0	0	0	0	1	0	0	0	1	1	0	0	0	0	0	2	1	0	0	1	0	1	10	1	5	5	5	30	1	3	31	2	2	0	81	4	5	2	5	4	6	1	0	1	0	1	0	1	0
RBP1	0	0	0	0	0	0	0	0	0	0	0	0	0	0	0	0	0	0	0	0	0	604	312	391	245	378	426	255	155	573	427	404	445	606	203	669	536	314	382	640	212	3524	374	48	116	229	165	124	282
TLR2	0	0	0	0	0	0	0	0	0	0	0	0	0	0	0	0	0	0	0	0	0	241	331	269	151	299	401	201	123	295	132	285	477	136	175	296	250	252	333	251	152	77	132	126	31	51	255	177	135
SLC40A1	0	1	0	0	0	0	0	0	0	0	3	0	0	0	0	0	0	0	0	0	0	22105	10626	17200	15616	27678	17946	6340	6361	19185	18658	19622	18281	2247	10386	23672	19445	9270	12234	26673	9221	14577	2169	2262	709	1436	2663	37123	20459
PLAU	0	0	0	1	2	1	0	0	0	0	0	0	2	0	0	0	0	0	0	0	0	558	1163	878	597	748	698	401	282	735	871	872	3312	384	394	1125	817	496	917	643	1627	1431	2777	1612	326	644	1644	3003	3036
IL1B	0	0	0	1	0	0	0	0	0	0	0	0	0	0	0	0	0	0	0	0	0	128	105	445	140	1497	316	78	158	199	62	141	2692	78	122	89	470	279	242	264	2779	330	284	584	52	207	586	154	1220
PAEP	0	0	0	0	0	0	0	0	0	0	0	0	0	0	0	0	0	0	0	0	0	0	9	0	0	0	0	0	0	0	0	1	0	1	0	1	0	0	1	1	0	3	17	39	1	0	8	1	42
MUC5AC	0	0	0	0	0	0	0	0	0	0	0	0	0	0	1	0	0	0	0	0	0	5	26	26	82	17	342	22	2	5	87	12	520	5	32	14	14	5	18	1	18	86	60	12632	235	1	16899	58	276
OBP2A	496	348	312	366	637	261	333	572	291	405	547	469	429	311	398	485	382	756	463	336	424	0	14	2	0	0	0	0	0	0	1	0	0	0	0	0	2	1	0	0	0	2	2	3	1	0	0	4	1
PLTP	0	2	0	0	0	0	2	1	0	0	0	0	1	1	1	0	1	1	0	0	0	2597	22967	3693	1364	3707	3232	4048	872	4317	3333	3702	4917	2918	2089	5050	4001	2885	3984	2711	2311	698	1789	1635	1067	2113	1762	820	1460
MX1	0	1	0	0	2	0	0	0	0	0	1	0	0	0	0	2	0	0	0	8	1	878	1608	1148	1175	2473	3241	12484	952	3389	2440	2336	4889	1523	2168	2353	1650	1300	5188	4262	1337	381	1179	6893	488	426	880	13054	1123
DDX58	0	0	1	1	0	0	0	1	0	0	1	0	0	0	0	0	0	0	0	1	1	806	918	1125	1105	989	845	1430	469	1573	1200	1085	1051	1188	873	2197	960	926	1314	2001	1124	365	460	763	57	99	291	1507	532
IFNL1	249	447	367	194	611	536	274	417	504	334	424	195	421	1041	321	446	1122	611	168	361	382	3	0	1	2	2	0	1	0	2	1	2	1	1	1	3	1	0	1	1	0	0	0	0	0	1	0	1	0
IRF3	175	185	292	243	263	140	242	147	188	270	139	155	293	237	264	162	203	366	143	157	396	1638	2460	2622	1748	2265	2652	3105	1051	3532	2437	2603	2770	1148	1652	2795	2839	1618	2476	3058	2852	1501	3487	1203	994	1849	930	4833	1688
SFTPA2	0	0	0	0	0	0	0	0	0	0	0	0	0	0	0	0	0	0	0	0	0	30	311	290	355	45	278	186	12	201	423	42	222	3	162	59	169	37	168	12	486	14	29	12	5	61	33	33	20
LPA	1	0	0	0	0	0	0	0	0	0	0	0	0	0	0	1	0	0	0	0	0	4	45	4	0	10	6	2	4	8	1	3	3	4	11	12	17	8	7	5	2	1	4	0	0	0	0	0	0
LBP	0	0	1	1	0	0	0	0	1	0	0	0	1	1	0	0	0	0	0	0	0	1	344	1	2	1	4	10	2	2	0	0	20	0	3	0	6	0	1	22	1	63	19	5	2	5	15	0	1
RBP4	0	0	0	0	0	0	0	0	0	0	0	0	0	0	0	0	0	0	0	0	0	92	237	586	514	190	85	80	55	270	386	126	632	20	88	210	171	153	114	332	269	273	115	224	249	149	219	172	55
NOX4	0	0	0	0	0	0	0	0	0	0	0	0	0	0	0	0	0	0	0	0	0	7	15	5	8	28	0	11	3	5	16	2	13	82	0	4	3	26	2	32	4	45	53	23	3	14	58	147	101
LTF	0	0	0	0	0	0	0	0	0	0	0	0	0	0	0	0	0	0	0	0	0	41	230	139	139	76	3048	711	100	4150	113	304	973	38	322	473	1448	249	207	113	583	132	197	19	43	31	96	9	111
IFNB1	0	0	0	0	0	0	0	0	0	0	0	0	0	0	0	0	0	0	0	0	0	0	0	0	0	1	0	0	0	0	0	0	0	1	0	0	0	0	0	0	0	0	0	0	0	0	0	0	0
RBP5	0	0	0	0	0	0	2	0	0	0	0	0	1	0	1	1	0	0	0	2	1	213	368	218	242	258	327	329	136	720	153	314	473	89	193	323	300	281	306	191	271	51	102	37	52	70	52	92	18
FABP7	1729	1031	740	885	685	1353	2071	683	2649	2179	666	935	2316	1585	1789	1428	948	783	1077	942	2689	1	4	0	0	1	0	0	2	1	1	1	4	2	2	0	3	0	0	2	0	0	2	0	0	0	0	0	78
FABP5	578	1013	1033	1227	884	626	1539	789	617	1344	609	458	887	847	678	823	495	407	799	616	955	3959	1011	2108	1352	3043	1956	2204	731	2106	2080	2010	2517	579	1209	2927	1789	1227	1945	689	1646	808	1512	917	265	96	486	325	1261
FABP3	8	42	9	14	18	34	30	16	9	39	3	4	43	36	28	10	46	3	23	18	21	548	380	227	144	582	141	305	80	260	298	186	408	958	346	417	201	227	199	191	222	39	67	18	73	59	45	125	56
FABP2	0	0	0	0	0	0	0	0	1	0	2	0	0	0	1	1	0	0	1	1	1	3553	1886	4225	2796	2961	2047	1989	1997	3708	2534	2107	1417	234	3647	2395	2133	3272	1517	35046	2854	59	39	166	2	15	75	502	544
FABP4	1	0	0	0	1	1	1	0	0	0	0	0	0	0	0	2	1	0	0	0	1	655	773	133	167	611	94	362	172	242	437	196	427	603	237	220	249	668	214	2471	163	16	16	5	5	5	28	8	27
R3HDML	52	114	142	121	106	69	85	73	112	147	37	37	106	141	136	99	139	59	144	85	160	7	47	44	27	22	31	55	21	39	14	43	9	2	23	44	44	8	25	10	50	65	17	1	31	33	2	36	2
BPIFA3	0	0	0	0	0	0	0	0	0	0	0	0	0	0	0	0	0	0	0	0	0	0	0	0	0	0	0	0	0	0	0	0	0	0	0	0	0	0	0	0	0	0	0	0	0	0	0	0	0
BPIFB1	91	67	23	60	70	27	38	121	29	40	104	107	59	24	61	52	49	129	101	34	55	0	2	0	0	1	0	1	0	0	2	0	1	0	15	2	0	0	0	1	0	0	0	18	0	0	1	16	0
OASL	8	12	16	11	10	6	7	6	12	19	6	4	10	8	13	7	10	5	10	7	16	5681	440	921	800	3881	4797	2065	2591	3652	789	1217	2244	440	6359	3692	2659	248	3934	275	455	205	1633	701	59	167	685	2990	852
CRABP2	0	0	0	0	0	0	0	0	0	0	0	0	0	0	0	0	0	0	0	0	0	165	52	36	62	153	36	264	21	86	188	53	257	724	79	52	49	200	59	147	82	24	243	97	30	42	324	2915	477
CRABP1	0	0	0	0	0	0	0	0	0	1	0	0	0	0	0	0	0	0	0	0	1	104	49	79	23	80	25	241	15	105	121	43	50	236	71	93	16	166	105	130	15	29	1	0	8	7	7	2	1
RBP7	0	0	0	0	0	0	1	0	0	0	0	0	0	0	0	1	0	0	1	1	0	121	92	45	107	81	23	65	19	52	95	71	108	127	30	33	51	61	81	128	58	36	27	8	9	1	10	20	15
DUOX1	0	0	0	0	0	0	0	0	0	0	0	0	0	0	0	0	0	0	0	0	0	24	262	159	47	107	177	238	52	165	112	194	746	119	55	146	117	76	144	121	95	189	140	56	50	64	34	278	166
OBP2B	0	0	0	0	0	0	0	0	0	0	1	0	0	0	0	0	0	0	0	0	0	0	1	3	0	0	0	2	0	0	0	1	0	0	0	0	0	0	0	0	0	9	0	0	0	0	0	1	2
RBP2	25	16	17	25	27	3	23	29	17	23	32	39	18	8	17	25	20	93	47	9	27	49	29	50	124	77	46	57	47	19	96	24	25	10	190	81	65	21	41	22718	70	90	355	5	41	76	12	102	83
LCN15	1585	2255	2051	1780	2490	2169	2468	2901	1684	2568	1543	1604	2782	2342	1692	1689	1787	1731	2491	1561	1994	1093	77	478	109	106	67	27	5	381	390	87	86	19	39	406	254	113	263	120	160	0	18660	7	38	58	18	2	634
CETP	0	3	3	1	1	1	2	1	2	3	0	3	4	1	2	0	5	3	2	2	0	16	20	23	21	10	132	38	11	125	25	53	68	38	8	27	48	20	21	49	30	24	58	8	13	9	19	39	33
FABP12	8	3	4	12	12	3	5	10	5	3	3	12	5	10	4	4	3	16	19	4	1	0	2	1	0	0	0	2	0	0	0	0	0	0	0	0	0	1	1	1	1	0	0	0	0	0	0	0	0
FABP9	0	2	2	0	0	0	0	0	0	0	1	0	1	0	0	0	2	0	0	0	0	0	0	0	0	0	0	0	0	0	0	0	1	1	1	1	0	0	0	1	0	0	0	0	0	0	0	0	0
BPIFA1	12	31	104	15	47	2	12	8	5	23	16	13	20	6	16	33	14	15	9	25	8	0	0	0	0	0	0	0	0	0	0	0	0	0	5	0	0	1	0	0	0	45	0	0	0	0	5	0	0
LCNL1	678	816	932	698	1028	907	950	1158	947	1148	670	639	1110	910	722	625	744	876	950	705	864	1	3	3	1	5	5	22	0	9	0	3	4	2	4	4	11	2	7	1	9	0	12	0	1	0	4	4	0
C8G	0	1	7	2	4	1	0	3	0	4	1	2	1	3	1	2	4	2	5	0	1	99	125	161	275	358	361	114	106	465	481	176	128	25	432	217	386	250	250	730	200	49	47	32	176	64	47	91	133
SPAG11A	0	0	0	0	0	0	0	0	0	0	0	0	0	0	0	0	0	0	0	0	0	0	0	0	0	0	0	0	0	0	0	0	0	0	0	0	0	0	0	0	0	0	0	0	0	0	0	0	0
PI15	437	461	421	497	799	344	555	786	283	505	476	379	488	383	356	523	296	502	644	373	579	424	629	129	297	595	61	1674	347	648	310	428	103	1704	158	334	142	1083	137	383	512	116	94	168	1	2	94	19	198
NOX1	1	1	1	0	2	0	0	1	0	1	2	0	0	0	0	0	0	1	2	0	1	694	5822	4725	6166	3978	5470	6167	2804	6752	8415	6319	7386	517	2794	6308	5454	3797	4065	456	7728	7439	8919	635	785	4799	1156	538	9719
PMP2	0	0	0	0	0	0	0	0	0	0	0	0	0	0	0	0	0	0	0	0	0	69	61	35	32	96	15	111	20	44	47	19	68	154	39	73	20	54	97	65	24	0	0	1	0	0	4	0	0
APOD	0	0	0	0	0	0	1	0	0	0	0	0	0	0	0	0	0	0	0	0	0	904	2201	481	505	2132	539	4915	172	1049	814	715	1596	976	695	1003	305	887	1452	460	207	176	325	20	126	262	148	118	391
ORM2	3	12	4	9	4	7	10	0	14	19	4	5	13	3	1	2	28	2	5	0	15	2	3	1	1	1	1	0	1	6	0	1	1	0	0	2	2	1	2	1	2	15	0	0	0	0	3	0	1
ORM1	1817	1951	2490	2547	2605	2242	3004	2340	3020	3538	1558	1324	3488	2872	2801	2069	1685	1989	2916	1904	3066	1	1	1	0	2	0	0	4	5	0	0	0	3	2	0	2	12	1	0	1	6	2	0	3	1	13	0	2
TNF	6	13	6	5	15	8	17	1	9	10	4	3	7	7	4	20	7	3	7	8	14	32	25	23	47	47	146	31	16	112	33	87	55	22	21	75	68	39	52	51	784	10	13	32	12	7	82	17	56
CTSG	1	0	0	0	0	1	0	0	1	0	0	1	1	0	0	1	0	0	1	0	0	294	556	324	315	145	309	209	130	653	260	292	897	155	192	554	512	546	786	382	223	1	6	11	5	2	65	13	1
PRTN3	1204	1568	1816	1015	2096	1656	1835	819	892	2050	1432	838	2024	1686	1374	1973	1271	1561	974	1825	1789	1	0	2	0	0	4	2	1	0	1	3	2	3	1	3	1	0	2	3	2	0	0	0	0	1	5	0	2
MAPK1	0	0	0	0	0	0	0	0	0	0	0	0	0	0	0	0	0	0	0	0	0	4896	8064	6825	4564	10834	6747	6930	3855	11142	9024	7243	8195	7057	6201	12401	8681	6311	7390	7617	6478	4248	3526	3430	359	672	3083	7158	4988
PML	737	313	500	544	845	192	312	855	181	431	1072	902	619	337	463	483	519	1095	571	366	551	958	3340	1825	1343	3011	3269	4307	1035	3769	2505	2780	2800	4371	1482	3245	2460	1896	3846	2929	1863	1720	3781	3767	696	2053	2259	5020	2868
AEN	0	0	0	0	0	0	0	0	0	0	0	0	0	0	0	0	0	0	0	0	0	1426	1076	1050	599	828	820	942	381	1213	898	608	1845	541	681	1092	1559	463	737	886	881	1225	3331	1656	409	512	1501	1702	2407
CYBB	10	49	18	10	22	38	101	4	10	74	11	12	73	10	89	16	2	4	6	32	106	1666	2563	2742	1527	2581	3591	1228	1062	4315	1702	3375	4256	1388	1684	3948	2785	1964	3458	1233	1950	507	369	757	60	103	681	675	274
BPIFA2	15	8	11	15	7	9	23	6	14	23	14	14	20	6	4	7	21	8	25	3	27	0	3	0	0	0	0	1	0	0	0	0	0	0	0	0	0	0	0	0	0	0	0	0	0	1	17	0	0
ISG20	0	0	0	0	0	0	0	0	0	0	0	0	0	0	0	0	0	0	0	1	0	2783	804	1913	1116	1965	3110	1898	865	2186	1731	1643	3292	188	1385	1415	2218	698	3328	2580	910	252	726	1342	438	155	579	906	1012
BCL3	5162	13255	5891	5966	7296	10534	9982	4797	8430	11330	3881	3817	11661	10851	6857	5581	7073	3093	6057	7105	8682	1471	4567	3274	2121	3588	3649	3474	1817	4572	3876	3292	6003	989	2960	4326	4693	1831	3738	8474	4298	1515	3028	1654	1370	3673	2119	2748	2443
ISG20L2	6120	8346	7308	5897	8542	8949	9718	5400	8469	11372	4689	3409	10520	10993	7399	6247	7109	5185	7696	5926	8038	1944	2069	2005	1460	2340	1862	2000	988	2997	1939	2032	2337	1321	1627	2651	2746	1797	1688	2108	2208	1862	3037	1047	219	793	1007	4104	1692
NOX5	1876	4836	3235	2256	3632	3335	4279	1124	2489	5414	3328	994	4494	4470	3428	2658	3690	1431	1913	2908	4086	11	7	23	0	7	5	4	10	2	6	10	5	7	12	10	11	9	15	15	3	4	2	2	0	1	1	9	5
NOX3	213	361	312	351	357	2247	383	614	376	601	164	211	809	703	489	357	806	1186	411	418	483	0	0	0	0	1	1	0	1	0	2	0	0	1	0	0	0	1	1	0	0	0	0	0	0	0	0	0	0
DUOX2	0	1	2	1	4	0	1	4	0	4	2	0	0	2	0	2	0	4	1	0	0	51	10558	1185	711	1361	12072	8614	3752	756	1836	7021	71844	151	212	285	1345	912	6746	55	779	1365	6976	8741	1127	4050	1749	5114	38862
TLR3	0	0	0	0	0	0	0	0	0	0	0	0	0	0	0	0	0	0	0	0	0	467	1809	1115	1382	3210	1549	1384	1129	3538	1946	1795	885	1328	1855	2846	1860	1285	1868	3667	1328	357	205	506	15	83	314	545	244
TFRC	0	0	0	0	0	0	0	0	0	0	0	0	0	0	0	0	0	0	0	0	0	16103	15734	11512	5064	36142	13212	12826	13314	11183	14411	16616	12317	2149	18362	20445	15543	6381	10212	10102	15460	10891	13327	8902	532	1666	4613	51474	19734
IFIH1	26	31	47	19	45	33	39	20	23	42	35	11	43	37	37	67	25	34	20	31	41	666	1468	960	1000	1686	1362	1689	702	2240	1177	1403	1336	594	1036	1920	1305	520	1821	1704	980	669	606	1207	54	139	353	2361	830
LRP1	3	8	5	16	2	0	10	1	4	2	3	1	5	8	8	3	3	2	4	20	5	3129	50037	21029	8478	38952	16013	30223	10192	36310	29898	27546	20016	27860	29312	39249	35558	17443	25934	35455	26336	6594	20334	1950	2381	13604	5334	23005	12639
TRIM5	769	788	1151	711	516	785	788	682	701	1206	397	541	993	695	769	803	644	992	883	438	975	691	1022	698	677	703	669	1029	434	895	797	886	1174	1028	540	1273	1132	748	957	935	896	555	800	478	48	123	407	817	922
IDO1	26	52	42	68	32	38	40	60	68	57	20	13	55	20	66	52	45	15	72	37	64	213	182	135	255	274	790	329	151	522	113	194	273	68	162	181	244	150	1152	259	131	188	230	1271	39	39	150	141	3
GDF15	0	0	0	0	0	0	0	0	0	0	0	0	0	0	0	0	0	0	0	0	0	270	1051	1206	1772	694	428	761	339	1718	2442	565	1032	48	393	1952	990	355	406	457	5313	3853	12465	13324	3811	10136	5686	9360	6663
NEDD4	0	0	0	1	0	1	0	0	0	0	0	0	0	0	0	0	0	0	0	0	0	363	713	651	299	427	529	622	180	594	669	414	1012	1301	388	481	558	670	338	3050	396	721	765	128	27	70	159	797	970
ADIPOQ	71	93	86	126	101	55	86	141	67	55	68	82	96	60	60	66	61	102	121	39	100	67	211	4	32	662	6	8	98	53	262	52	107	61	80	173	111	448	38	1176	80	1	1	0	0	0	3	0	0
STAT3	0	0	1	0	0	0	0	0	0	0	0	0	0	0	0	1	1	0	0	0	1	7099	16475	8593	6155	12733	11839	13344	5744	16786	11924	10824	16850	9930	8541	14404	12418	7696	13926	14089	10718	5957	6160	4451	1041	2485	4682	11740	6603
STAT1	3325	2560	2847	3600	3167	2340	3380	3259	3344	4573	2663	2983	4786	2989	3530	2191	2437	4254	3795	2632	4526	4346	6005	4037	4055	6736	16277	9544	2939	10445	7055	5165	9710	4805	4235	7725	5760	4050	20295	5671	4360	4785	8733	14538	400	877	2469	20996	3617
IFNL2	5	4	9	4	0	1	2	2	5	3	2	1	2	2	3	7	9	3	4	1	10	0	0	0	0	0	0	0	0	1	0	0	0	0	1	0	0	0	0	0	0	0	0	0	0	0	1	0	0
SOCS3	0	0	0	1	0	0	0	0	0	0	0	0	0	0	0	0	0	0	0	0	0	2369	6814	501	439	1064	1151	5814	2368	1313	2720	618	7972	464	733	889	3086	3382	1084	2448	3522	1290	2003	1514	520	412	1598	1427	1886
SEMG1	18	25	36	29	44	26	36	17	27	25	13	16	31	34	20	41	30	24	19	24	27	3	18	9	4	7	12	11	2	4	7	2	95	0	0	0	10	1	1	2	1	1	0	450	0	1	147	18	59
TNFSF10	0	1	0	0	0	0	0	0	0	0	0	0	0	0	0	0	0	0	0	0	0	10200	5642	6625	8009	14336	7946	5939	5051	10503	9267	7465	8784	1742	8174	12000	7591	5829	11225	13690	6042	2755	1003	2383	314	467	1080	5377	1788
CCL20	1252	1379	2054	1328	2276	1463	1771	788	1182	2163	1480	720	1890	2113	1589	1672	1125	1488	1021	2439	2287	219	437	299	1693	613	1684	1006	1195	2769	591	850	2857	151	606	392	675	903	1033	233	1081	3219	2971	159	360	231	602	350	12129
SOCS1	184	272	271	232	380	184	319	265	205	318	194	164	283	255	181	255	171	219	206	190	246	93	193	147	105	97	310	406	69	394	203	149	496	95	215	147	272	127	423	130	154	187	179	323	247	104	110	81	127
RNASEL	1	2	1	7	2	0	4	2	0	5	1	3	3	0	2	0	1	7	4	2	2	827	1493	1385	840	2382	1040	1210	979	2687	1527	1491	1274	852	1480	2897	1987	1158	1527	974	1353	286	278	196	28	126	303	1178	280
IRF1	9	24	12	20	22	10	17	16	27	25	6	9	23	22	20	9	62	10	62	23	24	3050	3598	3616	3953	6700	16286	4428	2573	9324	7009	5681	7905	1677	3752	6932	5547	2625	13989	8476	2921	2643	4903	6028	1084	1329	1988	4225	2507
IL15	0	0	0	0	0	0	0	0	0	0	0	0	0	0	0	0	0	0	0	0	0	486	304	317	254	251	373	409	143	300	335	201	339	336	318	397	230	227	539	434	249	158	204	150	21	8	87	187	197
APOBEC3F	0	0	0	0	0	0	0	0	0	0	0	0	0	0	0	0	0	0	0	0	0	148	214	175	177	251	378	205	78	459	211	272	215	227	151	243	247	156	245	125	198	126	170	175	24	35	67	361	76
CHIT1	2	0	3	2	1	0	0	1	1	0	0	0	2	0	1	0	0	1	0	0	2	13	83	9	32	38	102	189	6	7	9	28	2698	6	171	20	28	52	55	3	40	34	20	18	14	149	19	135	2
CD40	0	0	0	0	0	0	0	1	0	0	0	0	0	0	0	0	0	0	0	0	0	410	558	491	512	447	1251	533	178	1396	499	619	1009	531	324	637	802	459	1075	404	468	139	1165	297	283	151	294	117	101
TLR7	0	0	0	0	0	0	0	0	0	0	0	0	0	0	0	0	0	1	0	0	0	209	153	346	211	433	525	66	155	587	281	515	314	80	181	480	298	225	444	233	199	23	23	21	12	2	22	33	8
PPIA	2501	4815	3481	3333	4076	3650	4429	2583	2653	4830	3327	2015	4746	4117	3341	3295	3735	2770	3266	2452	4002	19301	12333	11140	11618	18162	14663	14842	6142	16971	14897	13145	18196	7758	9119	20076	16073	11061	12790	14403	12825	22699	24897	12481	1429	8853	8848	17374	31882
ZYX	0	0	0	0	0	0	0	0	0	0	0	0	0	0	0	0	0	0	0	0	0	5934	6956	5017	3380	6752	5888	10073	2204	8931	10072	5417	9101	34531	4522	6769	9501	10421	7945	10015	6204	4420	12201	6031	2782	7640	6365	11262	14858
NLRX1	1	1	1	2	1	4	2	1	4	3	3	0	2	1	0	2	2	2	1	0	2	585	1348	1171	803	1762	1037	1405	493	1807	1947	1540	1061	1695	890	1662	1475	1003	1212	1089	1459	334	894	451	229	381	696	1467	836
PGC	0	0	1	0	0	0	1	0	0	0	0	0	0	0	0	0	0	0	1	0	0	5	2	3	4	5	2	2	1	6	1	4	3	1	8	5	4	1	4	5	8	135	6	0	59	10	3	67	17
VEGFA	223	588	560	677	793	462	502	240	301	409	367	163	322	656	427	488	225	277	393	505	526	1754	4295	4203	1416	4571	2022	3611	2757	4528	2833	3073	3113	1115	3723	4263	2879	2320	2361	7163	5915	3936	6794	1189	869	4699	2533	19888	2634
IKBKE	0	0	0	0	0	0	0	0	0	0	0	0	0	0	0	0	0	0	0	0	0	688	1408	1335	1246	1483	1606	1408	629	2598	1913	1612	1596	210	708	2281	1652	794	1696	707	1606	936	959	256	285	589	459	859	918
ISG15	0	0	3	2	3	1	0	1	2	2	0	0	2	2	0	2	1	0	3	3	1	1148	801	650	1142	1584	2283	7391	465	1936	1660	985	3102	912	1054	1167	1086	703	4261	3053	667	467	2342	5119	912	336	1159	6703	1156
DHX58	14	25	10	23	26	25	29	20	19	16	28	13	22	30	25	17	18	13	27	37	30	278	577	440	379	645	584	1374	157	681	415	644	677	470	380	890	601	398	976	784	452	213	634	314	159	256	305	1380	256
TNFAIP3	458	2308	1058	319	4365	448	438	1172	941	926	665	365	806	2507	344	536	1342	386	315	2414	1537	1149	2731	3881	1509	2674	3285	3505	2112	5011	3113	2286	3882	1355	3168	4251	3404	2818	4653	4204	5870	1462	2903	780	192	579	1433	1003	979
TFR2	0	1	0	0	0	0	0	0	0	0	0	0	0	0	0	0	0	0	0	0	0	24	57	35	28	47	83	82	9	62	21	55	60	6	21	42	47	17	55	38	53	653	98	67	87	64	82	207	304
FCN2	0	0	0	0	0	0	0	0	0	0	0	0	0	0	0	0	0	0	0	0	0	0	2	0	0	0	0	0	0	0	0	0	2	1	0	0	1	0	2	1	0	0	0	0	0	0	0	0	1
MUC4	703	654	876	656	996	667	983	422	829	1032	782	318	901	958	837	929	484	769	730	1103	898	1317	27080	10051	4213	11476	8245	19589	5629	11839	12019	13973	17098	1321	6068	9681	11757	4837	9917	676	15846	316	1089	3721	982	416	1677	3568	5065
F2R	0	0	0	1	0	2	1	0	0	0	0	1	1	0	0	1	0	1	0	0	0	908	1091	993	602	978	903	1086	578	1158	927	1131	1117	1794	767	1076	948	616	1714	968	614	1433	898	571	219	324	733	1297	795
ELN	0	0	0	0	0	0	0	0	0	0	0	0	0	0	0	1	0	0	0	0	0	694	2713	1157	877	1464	541	5104	461	1547	2348	1221	2049	3961	879	900	908	1937	1574	1359	1448	1394	2818	74	499	1363	924	1378	402
IL27	0	0	0	0	0	0	0	0	0	0	0	0	0	0	0	0	0	0	0	0	0	6	11	7	7	12	22	9	6	16	14	9	14	2	10	24	10	20	17	3	6	1	20	4	0	9	6	1	3
MAPT	0	1	3	1	1	1	0	2	0	2	0	0	1	4	0	2	0	1	0	0	1	62	274	64	42	190	42	877	78	235	335	110	454	2947	131	165	83	717	264	333	197	23	14	4	0	21	12	14	26
LYZ	1	0	0	0	1	0	0	0	0	0	0	0	1	1	0	0	0	0	0	4	0	34311	3587	9946	13214	6408	17126	4499	1825	8724	5351	9239	18346	1415	5846	15327	7899	5177	17496	6632	7175	23248	794	5974	1415	687	2447	31520	109773
CCL5	0	0	0	0	0	0	0	0	0	0	0	0	0	0	0	0	0	0	0	0	0	2169	1135	976	3229	1907	5220	1771	327	4135	2761	1514	1031	385	826	2301	1131	1228	11797	2003	1001	274	527	459	391	58	621	605	245
LEP	0	2	4	4	2	0	1	2	2	1	2	2	2	0	3	3	2	1	0	1	2	18	174	1	3	54	0	7	30	8	8	3	29	5	33	13	47	103	9	190	3	1	0	0	0	0	4	6	10
CYLD	0	1	0	0	1	2	0	0	1	0	1	0	2	2	4	1	2	5	3	0	1	1148	2137	2288	1588	2508	2954	2312	1198	3959	2394	2396	2158	1976	1671	2915	2773	2307	2554	2267	2198	745	852	662	126	218	635	1652	679
KLKB1	108	86	95	101	78	56	95	56	85	124	113	95	117	79	102	132	70	155	88	143	132	15	28	67	21	30	16	48	8	77	46	26	10	29	26	35	46	39	26	163	40	3	3	7	0	1	1	10	0
CST4	0	0	0	0	0	0	0	0	0	0	0	0	0	0	0	0	0	0	0	0	0	0	0	0	1	0	0	0	0	0	0	0	0	0	0	1	0	0	0	0	0	77	7	0	10	37	10	1	0
CSRP1	1	1	3	3	0	2	3	4	1	7	1	0	4	4	3	3	2	2	6	2	3	33443	15570	12497	10680	20313	8472	52944	10178	16285	42580	11107	32726	397029	13803	16189	14052	87214	12436	56433	21937	5669	4705	3050	1402	4338	7233	13255	9275
MAPK14	0	0	0	0	0	0	0	0	0	0	0	0	0	0	0	0	0	0	0	0	0	3250	4133	3532	2892	5412	3350	3458	2163	5732	4004	3840	4213	3887	3129	5839	4090	3642	3279	3880	3421	4531	2824	1494	291	806	1604	4239	2265
JUN	16	76	98	53	53	76	58	70	49	102	56	25	69	72	66	43	71	41	57	43	77	2790	18254	11926	6255	12182	5730	26234	6429	15010	12813	9395	6573	5785	8885	20950	11089	8810	16783	8837	15906	7347	10918	1499	1966	11615	6116	11145	7228
ITGAV	1907	2418	2645	1797	3116	2245	2554	1314	2252	3052	1720	1178	2776	2983	2037	2094	1997	2214	1695	1887	2775	4031	5639	2940	2351	4909	3057	4222	2840	4433	3426	3653	4770	4678	3474	5882	3630	3776	3618	3208	2953	2445	2041	1734	53	309	2104	6755	2320
IRF5	232	321	280	361	316	227	372	334	381	403	247	195	429	406	321	254	341	228	437	215	384	375	473	676	299	649	769	479	208	1098	334	631	579	183	335	869	633	340	632	909	696	269	176	326	120	343	626	1597	257
CCR6	0	0	0	0	0	0	0	0	0	0	0	0	0	0	0	0	0	0	0	0	0	9	5	11	9	12	47	15	9	91	9	31	26	0	19	13	21	17	23	14	20	7	10	0	1	2	6	0	5
IL12B	6194	11255	7166	5939	8103	7427	9476	2820	7195	11144	5310	3255	11727	10775	9058	7286	9138	6877	5263	7504	10585	2	3	1	5	1	6	5	3	7	2	4	10	1	2	2	2	3	7	1	4	3	1	3	0	0	1	0	2
TLR8	3789	6075	4596	4234	5437	6664	6404	5501	7024	7170	2850	2968	7195	6631	5038	4047	4939	3264	6714	4307	5935	133	187	221	159	218	591	52	62	252	143	316	306	60	72	320	181	151	480	123	111	11	10	32	10	7	52	19	17
GNLY	0	1	0	0	0	0	0	0	0	0	0	0	0	0	0	0	0	0	0	0	0	541	198	371	181	698	202	509	58	981	342	377	154	105	166	103	272	57	306	836	90	58	309	99	96	3	283	132	50
CD81	4864	8660	6426	6393	8226	5859	7254	6183	6440	8132	3869	3016	8055	7382	4745	5811	5587	4255	7253	6761	9486	9781	16496	10403	9287	13461	10844	20900	4323	18924	18868	12838	18124	55055	6574	15243	13035	25160	13867	12516	11438	13781	12326	9101	5882	13440	11688	7833	17903
EIF2AK2	8	16	12	13	39	12	9	11	13	10	9	12	12	20	8	30	13	23	7	24	22	1610	3352	2299	1666	3235	2620	4257	1549	3526	2610	2570	3602	2710	2538	3565	2645	2605	2840	3812	2259	2465	1881	2339	101	366	1090	7404	2040
APOM	0	0	0	0	0	0	0	0	0	0	0	0	0	0	0	0	0	0	0	0	1	273	72	104	98	207	111	126	76	155	124	103	84	56	95	145	150	165	99	1295	91	80	80	43	32	48	35	150	175
CACYBP	751	1219	1253	1052	1705	1030	1453	812	1086	1541	799	626	1502	1198	1107	1181	994	1064	986	1073	1443	4591	2056	1967	2111	2945	1830	2126	1160	3672	2158	2052	3628	2203	1434	2949	2470	2414	1940	2689	1645	4029	1961	2540	445	568	1790	4737	3118
NOD1	170	206	167	178	256	177	270	123	181	311	124	120	226	164	221	190	165	212	227	172	201	365	817	620	412	548	379	799	182	673	496	650	595	289	295	935	615	361	601	305	601	368	1141	161	78	174	224	804	328
MAPK8	0	0	0	0	0	0	0	0	0	0	0	0	0	0	0	0	0	0	0	0	0	1914	1425	1519	1106	1876	1286	1321	988	1779	1552	1335	1455	1042	1221	2393	1871	1224	1229	2817	1373	1100	711	656	49	208	615	1868	747
MAPK3	0	0	2	0	2	2	4	1	2	0	0	1	1	0	5	0	3	0	0	3	3	9264	11152	12314	9620	20308	12608	11605	5611	21489	20181	13929	17908	4170	12412	19109	15444	8929	13529	20113	12458	2946	3576	2349	2209	3011	4881	5634	6440
BST2	0	1	0	0	1	0	1	0	0	0	0	0	0	0	0	0	0	0	0	0	0	1358	2212	1184	1269	1830	2487	3421	636	3269	1660	1836	2974	1771	1036	1904	1866	1984	3288	2131	1318	1181	2110	1550	885	634	1437	11991	528
BPHL	0	0	0	0	0	0	0	0	0	0	0	0	0	0	0	0	0	0	0	0	0	1323	807	626	728	1329	666	674	438	1315	849	1005	436	574	684	1243	1105	612	641	2716	688	817	553	293	115	218	425	1019	676
PLA2G2A	0	0	0	0	1	0	0	0	0	0	0	0	0	0	0	0	0	0	0	0	0	3196	106427	12906	10808	2453	32593	17838	1844	729	7274	1840	84318	1187	1143	2095	5167	2291	10379	17014	10210	154	5416	17753	2052	98	3412	4899	34087
GRN	4	9	2	1	5	2	5	2	0	6	1	3	7	2	5	5	9	5	6	2	2	16973	34709	31719	23517	49848	31256	31712	14893	56432	53860	42973	31687	11611	24955	46996	46920	19731	34694	29050	36363	9910	16789	17858	8395	19713	14305	29265	16790
PDGFRA	0	0	0	0	0	0	0	0	0	0	0	0	0	0	0	0	0	0	0	0	0	1564	6551	3752	1761	3211	1889	3874	1172	3166	2691	3429	3258	6476	1920	4244	1745	3599	2511	2730	2558	934	758	254	65	200	590	498	339
GNAI1	0	1	0	0	2	2	4	0	1	0	0	0	0	3	2	0	2	2	0	0	1	1335	1461	935	954	1367	852	1954	918	2185	1547	1174	1329	3316	1475	2075	2022	2687	1031	585	1105	532	901	756	20	106	328	692	112
WNT5A	0	0	0	0	1	0	0	0	0	0	1	2	0	0	1	0	1	2	0	0	1	407	934	346	253	709	450	856	555	457	342	483	508	406	390	604	447	450	388	322	341	683	658	492	50	118	516	1025	358
FURIN	1	6	0	1	1	3	1	3	2	1	0	0	4	0	0	3	1	1	2	1	0	3075	10307	7570	5326	9734	7251	7158	3641	12207	11278	8458	9425	3739	5423	11249	11575	5331	9076	10955	8678	2557	5802	2670	995	2268	2870	3798	5122
ADAR	0	1	2	0	0	0	1	0	1	0	1	0	1	2	0	1	0	0	0	0	1	6015	15825	11264	6576	15624	13484	16248	6174	18728	14419	14363	14488	10334	10103	17983	14305	9103	16456	18344	12108	7793	12715	8185	1380	3907	5084	21982	8075
TYK2	2	4	5	2	6	4	5	4	4	7	2	3	5	4	3	0	2	2	1	1	3	1305	3859	3777	2020	3354	2957	4025	1193	4301	3076	3555	2903	1569	2175	4400	3941	1894	3396	3403	3964	1694	3385	1064	694	2847	1115	5662	1551
NOS2	1	1	2	3	3	0	4	0	3	7	0	2	6	1	0	3	1	6	0	1	3	193	3378	1292	1045	980	6006	2344	875	1548	2417	1460	21119	193	382	1439	1029	729	7926	430	2632	762	7346	2634	456	837	308	1693	8704
TRAF3	0	0	0	0	0	0	1	0	0	0	0	0	0	0	0	0	0	0	0	0	0	1171	1984	2581	1565	2898	2735	2218	1204	3911	2797	3026	1999	1367	1849	3074	3447	1750	2559	3619	2953	1180	1576	574	263	411	1072	789	1431
TPT1	1	0	0	5	1	0	0	1	1	1	0	2	1	0	1	0	1	1	1	0	2	305813	136933	134783	159522	180399	137543	126678	74782	238485	140730	147152	172015	110243	88505	208243	160563	138683	120403	225058	101332	312320	96497	55549	14981	26322	57739	46575	281439
TPM2	1575	3230	2078	1731	2323	2526	2967	1914	2591	3354	1306	1579	3841	2293	2209	1522	2662	1713	2196	1717	2621	18237	7232	3072	2865	6772	1510	39400	5193	5122	39336	2833	15965	341408	6127	3764	2867	64817	3480	47797	10675	1559	4771	652	808	2138	2942	3748	5075
NEO1	335	1184	422	264	317	938	926	189	697	1191	284	175	1196	770	633	452	976	168	314	573	563	3603	15878	13164	7207	14037	9853	12561	5233	16800	16237	13953	8414	5597	7048	18242	14655	8258	11678	12049	18175	2468	5625	1850	375	1059	1826	8489	4874
AHNAK	1647	1821	2302	1867	3081	2688	2752	1368	1799	3487	1477	1493	2854	2841	2175	2040	1353	1941	1535	1757	2657	10722	70273	46202	19044	56898	33865	93378	23496	62154	90082	49849	40260	183267	70282	67565	50554	78979	50544	86581	62649	4768	20490	9792	437	2954	11673	25930	20937
TLR1	374	173	125	174	230	229	467	93	282	610	206	273	427	209	624	178	185	203	165	278	988	325	217	274	239	383	459	206	122	474	194	431	364	176	174	529	326	283	378	240	226	26	20	61	8	2	73	91	26
TK2	0	0	0	0	0	0	0	0	0	0	0	0	0	0	0	0	0	0	0	0	0	880	1326	1026	757	1687	1040	1288	538	1705	1157	1278	1392	929	780	1882	1335	799	1290	2889	984	1048	1064	398	215	266	570	1920	769
PRDX2	28	29	92	58	64	36	51	47	26	36	24	30	53	29	35	53	16	54	31	24	41	13012	8838	6885	8791	11349	7367	9863	3061	11622	10784	7974	10580	6766	5004	11566	9852	7264	7977	14569	7947	6703	10269	7147	2943	6636	7338	13569	10581
MX2	38	300	60	77	22	120	126	10	124	157	20	21	171	78	223	26	276	14	72	22	154	301	398	343	240	434	588	2476	180	790	288	541	1106	360	323	515	488	394	868	1004	281	392	449	512	80	198	275	3711	456
FGF2	17	26	31	22	9	7	15	8	23	29	10	14	14	14	10	24	13	23	19	5	25	311	532	210	126	343	122	703	211	287	481	184	551	1832	196	226	200	915	265	420	208	66	69	1452	6	11	64	39	70
FGA	0	0	1	0	0	0	0	1	0	1	0	0	0	0	0	1	0	0	0	0	1	1	0	0	0	0	0	0	0	0	1	0	4	0	1	1	2	1	0	1	3	27	10	0	0	21	4	0	3
TCF7L2	0	0	0	0	1	0	0	0	0	0	0	0	0	0	0	1	0	0	0	0	0	1829	4410	4704	2803	5902	4182	3797	2846	7844	5225	4376	4719	2231	6399	8385	4652	3533	4093	4347	5042	1491	1511	1842	197	450	1331	3580	3449
F2RL1	0	2	4	5	3	1	2	1	1	3	2	1	0	3	4	2	4	0	4	1	2	13112	8087	10760	9029	13712	9049	7816	5826	15944	13952	8026	9431	1023	13580	16551	14394	6816	12561	8465	10624	1832	2937	2776	350	758	3497	2964	6963
TKFC	18	9	27	9	4	23	16	8	14	18	7	3	16	20	8	14	14	11	15	10	10	1396	2443	1912	1344	2410	2024	2458	868	2537	2453	2419	1921	736	1292	2920	2690	1249	1907	31495	2214	955	2656	949	671	1164	1040	2268	2607
MSR1	1	0	1	0	0	0	0	0	0	0	0	0	1	0	0	0	3	0	0	0	0	1666	544	890	554	563	338	227	229	470	531	657	1139	256	322	1264	764	268	525	487	353	142	163	397	8	37	344	384	242
NFKBIZ	0	0	0	0	0	0	0	0	0	0	0	0	0	0	0	0	0	0	0	0	0	1110	2807	3331	1108	1329	3036	2495	1997	2212	1695	1399	7394	528	1547	1760	2240	2373	2006	1601	2722	1379	913	625	196	153	658	1910	445
LMBR1	0	0	0	0	0	0	0	0	0	0	0	0	0	0	0	0	0	0	0	0	0	1298	1830	1496	1113	1959	1391	1350	873	2612	1809	1578	1679	1364	1157	2203	1822	1458	1390	1849	1305	3328	1423	1137	136	471	1081	2844	3046
EPPIN	0	0	0	0	0	0	0	0	0	0	0	0	0	0	0	0	0	0	0	0	0	1	3	0	0	0	0	1	1	1	0	4	0	0	0	0	1	0	0	0	0	0	0	1	0	0	0	0	0
SRC	0	0	0	0	0	0	0	0	0	0	0	0	0	0	0	0	0	0	0	0	0	3133	6405	5853	4154	8628	5840	6398	2564	8800	7972	6550	6512	3485	4887	9308	7202	4133	6310	9178	6513	3107	5883	1914	805	3060	2258	9641	3731
MPO	1	0	3	2	1	0	1	0	1	0	3	0	0	5	2	2	0	3	2	1	1	8	10	7	3	9	22	9	3	9	4	3	8	20	4	6	5	5	13	7	7	14	10	5	0	10	4	2	86
ELAVL1	0	2	1	0	0	0	0	1	0	0	0	0	0	0	0	0	0	0	0	0	0	2113	3629	2621	1983	4008	3014	3844	1544	5091	3556	3249	4494	2436	2161	4253	4129	2713	3218	3392	2765	2807	3939	2456	619	1966	1896	4966	4039
ROBO3	0	1	0	0	0	0	0	0	0	0	1	0	1	0	0	0	0	0	0	0	0	136	207	252	95	144	188	527	57	169	235	164	212	441	103	149	161	219	229	117	257	17	431	15	7	49	55	80	38
SP1	0	0	0	0	0	0	0	0	0	0	0	0	0	0	0	0	0	0	0	0	0	2320	7295	5247	3275	7089	5850	6528	3248	9038	6814	6674	6041	5706	6253	9469	6782	5236	5794	6959	5957	3249	3714	2517	170	1125	1874	8708	4089
SOD1	31	8	37	13	28	8	7	25	16	18	64	22	21	28	10	47	18	46	23	7	25	9879	9113	6499	6470	12980	12698	10377	5776	15555	11419	8366	15309	6037	7826	14321	11125	8884	11524	15128	7250	7151	6434	7662	2672	4275	3424	13600	15730
PDF	0	0	0	0	0	0	0	0	0	0	0	0	0	0	0	0	0	0	0	0	0	114	147	79	67	105	100	99	27	111	142	109	135	39	59	105	126	39	134	88	113	65	237	219	139	65	104	122	87
DLL4	0	0	0	0	0	0	0	0	1	0	0	0	0	0	0	0	0	0	0	0	0	257	2232	787	863	964	1055	1001	263	1441	1074	1337	1417	460	311	2000	929	553	1151	884	857	474	1510	220	225	704	309	348	645
ECD	0	1	2	0	0	1	1	0	0	1	0	0	1	1	0	1	0	0	0	0	1	1068	1102	1003	781	1410	1001	1122	546	1574	1156	1048	1517	1143	734	1651	1330	1032	996	1118	988	983	1171	490	76	296	584	1717	980
SLC11A1	254	286	589	311	412	493	386	485	230	403	221	161	408	312	255	294	277	297	408	256	335	120	185	65	41	88	75	155	39	73	45	57	195	60	47	53	112	238	90	94	51	77	176	310	59	170	423	485	341
DMBT1	0	0	0	0	0	0	0	0	0	0	0	0	0	0	0	0	0	0	0	0	0	954	180611	3077	1439	1829	41566	39723	6637	2327	7322	2707	62798	421	1270	2861	2952	4030	42390	13187	5633	2824	1580	21122	8063	725	7140	725	53025
SKIV2L	0	0	0	0	0	0	0	0	0	0	0	0	0	0	0	0	0	0	0	0	0	1096	2470	2352	1221	2999	2273	2769	935	3166	2419	2432	2401	1313	1925	2947	3051	1589	2327	3144	2551	1461	2519	1171	646	1248	956	3397	1361
SEMG2	1574	2987	2165	1333	2406	2181	2130	1007	1841	2836	1721	867	2302	2628	2069	1778	2470	1556	1449	2167	2334	0	0	0	0	0	0	0	0	0	0	0	0	0	0	0	0	0	0	0	0	0	0	313	0	0	6	6	5
DES	76	222	89	47	90	118	137	89	204	242	68	76	123	114	196	45	257	77	136	82	156	72447	11644	5791	6250	17427	1860	138045	13770	8387	138906	4124	43278	1027727	15433	5946	4269	132193	7188	162227	29102	202	971	325	364	7103	6928	928	813
DCK	0	0	0	0	0	0	0	0	0	0	0	0	0	0	0	0	0	0	0	0	0	2292	1354	1201	1570	1471	1527	1295	778	2235	1134	1367	1551	785	882	1777	1558	1161	1113	998	1016	1881	699	747	46	104	473	2461	1195
DAXX	532	514	781	526	833	603	587	561	562	768	599	463	707	795	609	579	487	782	734	521	722	2375	3279	2613	2550	3368	3445	3163	1324	5211	3377	3398	3626	2050	2035	4158	3866	2466	2978	2816	3130	2266	4006	1303	533	1219	1172	4460	3040
TNFRSF10A	1773	1953	2028	1369	2938	1719	2153	1084	1178	2310	2470	1696	2632	2386	1742	2362	1867	2639	1204	1733	2540	457	876	592	349	557	575	671	309	850	387	623	814	114	415	709	646	361	477	580	677	1095	1013	862	85	417	468	572	647
TNFRSF10B	0	0	0	0	0	0	0	0	0	0	0	0	0	0	0	0	0	0	0	0	0	1077	2083	2460	1251	2182	1875	2320	1229	2406	1794	1703	1974	705	1481	2432	2670	1168	1679	5451	2241	6011	4723	3222	234	1571	3233	2969	4134
EED	0	0	0	0	0	0	0	0	0	0	0	0	0	0	0	0	0	0	0	0	0	1049	875	782	754	1166	895	860	427	1379	746	924	1156	445	612	1406	1106	687	821	597	757	640	828	563	109	196	325	2383	968
CCL4	0	0	0	0	0	0	0	0	0	1	0	0	0	0	1	0	0	0	0	1	0	179	98	85	136	212	321	105	97	187	159	179	399	29	104	149	157	72	396	91	853	115	86	314	40	16	443	134	174
LIMS1	84	81	106	108	157	80	89	117	71	88	108	82	86	81	97	97	61	165	99	78	127	1940	2271	1605	1651	2041	1720	2163	913	2619	2106	1681	2352	3402	1330	2546	1837	2363	1810	2358	1683	2351	1493	1114	119	346	1263	2967	2270
LALBA	9	26	11	5	11	7	8	2	16	13	10	3	19	32	10	18	8	4	9	18	24	0	0	0	0	0	0	0	0	0	0	0	0	0	0	0	0	0	0	0	0	0	0	0	0	0	0	0	0
APOBEC3H	1	4	6	2	3	4	9	2	6	7	4	2	6	7	4	10	21	5	7	2	17	22	18	13	13	11	53	36	10	35	16	23	22	11	2	14	21	8	30	17	9	9	17	31	6	3	7	4	3
TMPRSS6	0	1	0	0	0	0	0	0	0	0	0	0	0	0	0	0	0	0	0	0	0	10	22	57	124	56	22	52	3	32	134	68	24	16	17	23	26	14	10	38	166	15	89	0	3	12	7	15	20
SPINK5	1991	2569	2042	1803	2740	1773	2018	2453	1380	2178	2397	1911	2918	2338	1819	2075	2390	2295	2322	1894	2584	169	552	767	821	163	532	512	170	224	939	285	1021	88	252	289	500	299	234	32	1458	54	46	98	13	85	100	465	23
MARCO	0	0	0	0	0	0	0	0	0	1	0	0	0	0	0	0	0	0	0	0	1	48	3033	121	44	311	230	161	26	297	190	121	585	524	154	124	86	234	251	15	12	4	29	183	9	305	96	33	351
BECN1	0	0	0	0	0	0	0	0	0	0	0	0	0	0	0	0	0	0	0	0	0	2686	4191	4199	3131	5537	3768	4010	1866	5365	4782	3946	4435	2420	2996	5863	4807	3151	3721	4772	4475	2263	2799	1075	262	1004	1048	3575	1994
TNFSF11	0	0	0	0	0	0	0	0	2	0	1	0	3	0	0	2	0	0	0	2	0	8	7	60	70	35	115	81	74	109	9	102	75	6	46	41	113	96	51	11	104	281	95	7	11	48	20	36	7
KNG1	0	0	0	0	0	0	0	0	0	0	0	0	0	1	0	1	0	0	0	0	0	78	17	285	65	119	74	34	2	272	282	125	48	9	141	399	154	85	32	11	134	10	14	2	7	0	5	35	13
CSK	4	4	6	1	3	5	2	3	7	2	3	0	6	2	4	5	0	4	7	13	3	3266	5666	4330	3418	7010	7450	6654	2259	11105	6280	6761	7617	1528	4266	7414	7809	3500	8057	5020	5490	2839	5489	1904	1162	1550	1812	4372	2980
KLRK1	0	0	0	0	0	0	0	0	0	0	0	0	0	0	0	0	0	0	0	0	0	6	12	19	19	9	15	25	16	28	1	14	7	6	14	10	22	11	28	9	18	3	7	3	0	0	3	11	0
KCNH2	0	0	0	0	0	0	0	0	0	0	0	0	0	0	0	0	0	0	0	0	0	234	628	387	209	537	247	1620	254	509	1695	451	1392	9546	282	454	401	2103	373	1403	693	959	297	113	114	645	173	30	667
JUND	3024	26946	6590	3691	5435	14812	11741	3709	5862	19330	4369	3101	14579	22478	8052	9622	21714	2498	2196	2045	8836	5058	11327	9134	5318	11893	7678	15059	6638	17827	18663	8994	6398	4710	11402	12246	14842	10525	12471	20366	15399	2571	6688	3362	2729	5569	6068	4710	7805
JAK1	916	1168	1946	730	1573	1267	1232	891	781	1663	2317	764	1661	1377	1143	1544	1315	1484	634	1766	1587	3174	10145	8732	5300	11894	9430	8995	4788	16092	11494	10107	10478	9589	7922	14546	11739	8832	9779	10585	8086	5754	3769	2553	174	1145	1689	11380	6638
CLDN4	0	0	0	0	1	0	0	0	0	1	0	2	0	0	0	0	0	0	0	0	0	28643	39537	50491	32943	52373	35144	40842	21967	85999	78846	38598	58676	4789	60791	75587	80812	39818	58237	43732	86118	18590	40366	14727	22674	40123	19917	13943	46263
CCL28	29	41	54	39	34	21	37	29	23	50	36	21	27	55	34	43	18	43	34	37	49	6295	6727	5053	7303	6708	8177	5292	3789	9036	6534	4925	8958	583	3801	7590	6417	3868	5075	521	6587	760	402	671	275	120	841	1433	819
RNASE3	4	5	5	2	1	1	3	2	1	3	0	0	0	1	0	7	1	2	1	1	2	1	3	14	2	5	4	5	6	5	3	6	1	0	8	7	6	2	7	3	3	0	7	1	0	0	3	1	2
IRF7	0	0	0	0	0	0	0	0	0	0	0	0	0	0	0	0	0	0	0	0	0	799	1066	856	841	1260	1230	2544	430	1841	1215	1433	1243	237	1045	1275	1425	517	1675	1496	1034	293	1009	786	742	719	966	1414	451
IREB2	1895	2101	2683	1943	3085	2179	3117	1618	1915	3011	2043	1337	3077	2763	2052	2466	1722	2240	2046	1805	2966	2007	3764	3150	2026	3686	3109	2649	1773	3661	3103	2879	3325	1850	2810	4566	3156	2576	2511	4483	2740	1735	1519	1176	16	164	924	2423	1557
ILK	2	0	0	0	1	0	1	0	2	2	1	0	2	0	7	0	1	3	1	0	2	1232	774	820	718	836	705	1190	256	1128	1430	844	1261	6349	556	1004	855	1495	814	1284	914	319	424	119	39	167	244	435	248
IL18	4	2	12	4	0	4	2	0	2	5	1	1	2	1	1	2	1	7	3	0	3	2730	1793	1915	1928	2012	2557	2985	1419	2688	1502	1983	4427	350	2223	2707	2473	1034	1924	1285	1521	787	650	1716	71	46	1180	1495	2367
IL17A	1866	2138	3310	2692	4823	2554	3564	4120	2148	3586	2662	2245	3470	2949	2407	2641	1862	3153	3262	2378	2814	0	1	0	0	2	33	0	0	4	0	8	32	0	0	0	2	1	1	3	1	95	7	1	2	3	2	3	0
LTB4R	1598	2301	2354	1990	2529	2272	2774	1974	2154	3090	1348	1155	2802	2504	2115	1686	1644	1640	2483	1749	2405	69	179	285	77	108	177	240	70	136	88	181	127	81	134	153	168	135	170	258	237	176	500	90	108	236	129	359	63
APOBEC3A	0	0	0	0	0	0	0	0	0	0	0	0	0	0	0	0	0	0	0	0	0	140	19	262	38	996	256	89	408	98	101	138	146	23	1369	341	122	63	258	26	75	3	19	19	1	0	28	6	20
MASP2	783	930	808	970	924	728	1178	1114	855	1226	703	751	1193	896	963	830	923	754	1183	691	1155	14	117	171	51	65	60	132	34	83	60	92	25	85	49	90	50	66	28	72	77	21	14	13	0	11	9	49	6
TRIM27	0	0	0	0	0	0	0	0	0	0	0	0	0	0	0	0	0	0	0	0	0	2560	2768	2708	1809	2604	2346	2480	1187	3424	2373	2913	2827	1425	1406	3143	3349	1607	2227	2061	2334	2806	2917	1976	796	1582	1569	3127	2291
RELA	4	0	8	1	1	1	1	1	7	5	1	1	3	3	1	12	2	6	1	3	9	3159	5153	3936	3065	4999	4489	4382	1817	7571	5790	4682	5606	4628	3226	6147	6251	3930	4535	5355	4868	2475	3963	2420	724	2109	2707	5704	3884
IL7R	66	148	74	63	68	66	99	81	74	112	36	31	90	75	49	47	137	26	71	29	75	1072	524	2040	840	962	1009	1731	574	2888	594	1610	1542	236	1761	831	1498	3036	1619	1416	1153	756	415	342	38	60	569	183	164
IL1A	2	0	1	3	3	1	2	0	3	0	0	0	1	1	2	2	0	2	1	0	2	11	4	8	14	33	22	13	16	4	3	9	96	7	8	3	23	11	14	3	109	18	76	42	0	243	50	113	199
PTX3	1218	2951	1697	1319	994	2145	2523	633	2189	3086	867	639	3166	2084	2158	1030	2947	573	1196	693	2413	59	200	70	80	153	41	190	31	76	87	113	140	264	50	126	86	158	61	210	78	8	7	10	0	2	24	2	15
IFNAR2	252	433	358	278	512	192	328	260	349	349	271	195	456	509	347	391	442	436	403	245	522	700	746	816	401	823	1048	419	414	1003	860	1201	933	384	730	1169	956	491	876	811	504	437	302	188	91	154	293	1581	395
SYTL1	0	0	0	0	0	0	0	0	0	0	0	0	0	0	0	0	0	0	0	0	0	319	400	701	716	299	847	351	141	850	351	758	562	22	245	578	761	200	556	210	519	314	592	1435	275	78	1531	3561	1046
APOBEC3C	0	0	0	0	0	0	0	0	0	0	0	0	0	0	0	0	0	0	0	0	0	635	1410	2481	2702	1268	2583	2010	635	3218	3413	2438	1841	3825	738	2104	2319	2064	1623	1128	2660	362	1343	2595	112	166	475	2608	209
DDX17	0	0	0	0	0	0	1	0	0	0	0	0	0	0	0	0	0	0	0	0	0	10975	19799	21689	9155	17556	16741	19693	10221	21913	15275	17663	11318	14134	13985	23059	21893	16114	13186	19604	24070	13417	12868	5253	717	3156	4856	27192	8073
PTGS2	3620	7371	5176	5842	4830	4912	6824	4838	5858	7925	3231	3253	7287	5529	6118	4068	4801	3848	7295	4395	5732	221	604	91	85	483	109	337	228	70	199	70	585	665	107	181	246	592	119	277	1726	131	246	1425	7	7	1155	5707	626
HTR1A	3338	8915	5363	4438	6163	5485	7625	3094	4733	9260	3844	2640	7300	7254	5972	4586	6025	2697	4164	4710	6736	0	0	0	0	0	0	0	0	0	0	0	0	0	0	0	1	0	0	0	0	0	0	0	0	0	0	0	0
CD40LG	1	8	4	7	6	3	14	4	6	10	4	5	9	7	2	6	5	1	12	5	8	52	41	94	101	105	110	70	38	281	47	153	113	25	87	95	70	117	109	78	69	50	10	2	6	8	18	11	3
CD14	9	3	0	2	4	2	1	11	1	0	1	2	9	4	1	1	2	3	1	10	1	3956	6490	5843	4640	5040	4667	1705	1352	5925	7390	5766	8313	2351	2465	5519	5863	3046	4961	2616	5428	801	986	1240	749	996	1948	1548	1048
MASP1	0	0	0	0	0	0	0	0	0	0	0	0	0	0	0	0	0	0	0	0	0	486	217	311	206	273	48	2122	105	108	2067	111	1366	6322	237	240	109	3512	136	651	809	9	17	25	0	45	33	5	7
PROC	1	2	0	1	6	0	3	0	1	5	2	0	2	1	2	7	3	6	1	4	7	44	50	211	186	124	97	56	39	170	56	184	63	8	37	88	76	63	69	144	166	65	93	6	47	174	33	142	66
MAP2K2	9057	23791	14712	13051	15493	17728	18801	13360	14641	21958	8560	5846	18087	15758	11935	11877	20347	8985	16596	8826	15269	7833	9843	8328	7208	14265	9758	9796	3980	14964	14463	9901	11112	4550	9950	16200	12489	6274	11173	12583	9206	3887	7620	3931	2464	6073	3852	5536	7474
MAP2K1	4168	10588	5644	4715	7636	8607	7774	5306	6120	10310	8152	4205	9852	7695	7056	5535	10288	5613	5510	4679	7563	1913	2427	1952	1506	3118	2315	2201	1291	3675	2459	2500	3093	1879	1486	3215	2551	1864	2367	2651	2002	1554	1792	1520	128	363	1668	4880	2267
HRG	0	0	0	0	0	0	0	0	0	0	0	0	0	0	0	0	0	0	0	0	0	0	0	0	0	0	2	0	0	1	0	1	0	1	0	0	1	1	0	0	1	0	1	0	0	0	0	0	0
NDRG1	0	0	2	0	2	1	0	0	0	0	0	1	0	0	0	0	0	0	0	0	2	14612	42194	26438	16404	129667	18631	25439	30114	107326	34660	44831	24606	9568	71477	105624	47985	31014	43066	81011	31546	5214	9285	4996	1290	7358	11298	44483	21831
IRF9	2	4	1	0	2	0	1	0	5	2	0	0	3	0	4	5	2	1	3	1	6	97	196	278	126	134	331	437	105	221	144	232	234	143	200	217	160	91	351	220	202	198	341	58	17	65	63	572	47
TRIM22	0	0	0	0	0	0	0	0	0	0	0	0	0	0	0	0	0	0	0	0	0	1098	1128	1216	1074	1057	2355	2904	650	2730	1026	1309	2132	2192	824	1462	1175	1239	2805	1116	965	445	1189	1435	103	97	420	1790	817
LANCL1	0	0	0	2	1	0	0	1	1	2	0	0	0	1	0	0	1	0	2	2	2	1970	2473	1939	1575	2451	1556	2373	1097	2465	2266	2038	1965	4031	1290	3409	2322	2828	1691	2441	1790	1838	1026	1087	58	197	641	3329	1857
PPP4C	2	1	0	1	0	0	1	0	1	3	0	0	2	2	1	0	1	2	0	1	2	6151	4552	4391	4512	5778	5338	4970	1862	7266	6075	4958	6102	1947	3225	6009	5965	2775	5335	5520	4305	2971	4841	3549	3135	4664	3970	6313	5279
HMOX1	1131	1548	1530	1363	2042	1885	1897	2138	1331	2182	1329	1041	2357	1764	1510	1470	1326	1388	1679	1571	1761	2510	2726	3165	2364	7585	4373	2006	2783	7892	3642	4529	5468	739	5837	6388	4032	2726	4714	10696	3157	262	2021	535	149	130	1359	2856	1538
HMGB1	894	159	117	238	1164	221	114	845	72	147	1622	1179	511	219	306	937	435	965	552	164	350	11805	9623	6864	8089	10259	8779	10103	4743	11825	8844	7920	11631	7663	5482	11447	9465	10078	8166	11086	7523	20306	13143	3979	261	874	2921	5977	15980
RNASE7	821	626	1082	849	1888	798	907	1678	566	995	895	1050	1350	737	744	842	498	1258	1086	786	1218	1	15	8	3	2	3	8	5	8	8	4	5	2	1	6	11	5	3	3	11	81	6	8	0	1	6	39	4
ABCC4	0	1	1	0	3	0	1	0	1	0	0	0	5	1	0	1	0	0	0	1	1	741	2567	2047	826	1185	848	963	450	1367	1904	1186	1868	1938	719	1942	1278	1228	1162	640	1348	733	604	354	93	136	371	469	134
HGF	0	0	0	0	0	0	0	0	0	0	0	0	0	0	0	0	0	0	0	0	0	134	492	132	88	217	99	158	90	191	114	202	429	150	115	196	162	133	122	73	88	155	73	27	2	9	37	19	9
HDAC1	3393	5913	4122	3137	8562	6283	6501	6931	4127	6730	4076	2835	7006	5718	3594	4417	6862	3541	4166	5349	4855	12240	12159	12189	9970	16882	14445	10662	6135	16974	12795	11538	19586	3955	11602	19081	14135	8873	12571	8675	11612	9380	7657	6730	1209	2804	4769	19115	10311
IFNLR1	0	0	0	0	0	0	0	0	0	0	1	0	0	0	0	0	0	1	0	0	0	441	400	1139	772	1549	1156	320	553	1770	1211	786	1321	81	1249	1191	1160	688	932	3436	1036	359	463	222	75	146	219	1150	489
PLSCR1	0	1	0	0	0	0	0	0	0	0	1	0	1	0	0	0	0	0	0	1	0	5750	5071	3703	4042	5536	4692	6190	3269	7054	4290	4033	7320	1462	4165	7430	4677	3484	4780	2393	3276	3202	2266	2462	162	646	1707	8224	1906
BACH2	2	0	4	1	3	2	3	3	2	1	4	5	0	0	1	1	1	7	10	0	1	40	74	69	58	74	361	291	49	763	79	393	201	124	114	207	333	240	117	88	153	18	27	17	4	7	28	27	23
TANK	0	0	0	0	0	0	0	0	0	0	0	0	0	0	0	0	0	0	0	0	0	2241	1671	1538	1554	1634	1680	1466	977	1947	1591	1541	2202	1036	1367	2108	1904	1550	1336	1694	1430	1229	791	502	78	211	472	2025	1325
PIK3CG	20	25	9	5	2	7	7	9	14	13	22	7	17	3	11	24	12	7	24	16	16	319	980	501	212	593	609	314	225	1009	323	612	450	105	296	975	1050	368	629	219	356	51	26	42	13	3	80	48	7
ARRB1	0	0	0	0	0	0	0	0	1	2	1	0	1	0	0	0	0	0	0	0	0	1932	3577	3229	2660	3969	2862	3336	1338	5928	5390	4052	3184	3840	2797	5632	3489	3147	3475	3849	3557	1059	1175	482	611	315	668	1167	2031
RSAD2	46	59	81	61	45	42	76	28	52	93	59	39	45	67	72	97	37	59	41	72	123	780	317	504	595	993	1803	3031	817	666	739	504	1177	666	3727	1410	709	276	2148	842	772	53	188	1891	18	42	365	1108	145
STAB2	67	129	171	113	169	103	170	99	122	139	44	46	135	167	84	147	67	83	165	123	136	57	147	243	62	333	53	143	47	352	316	187	108	292	197	315	330	218	148	23	212	3	20	8	1	3	18	9	14
TBK1	0	0	0	0	0	0	1	0	0	1	0	0	0	1	0	0	1	0	0	0	0	1119	1299	1037	966	1431	1285	1056	777	1622	1051	1106	1514	929	1070	1581	1351	909	1087	1899	937	933	888	405	25	138	364	1855	990
PDYN	1	10	31	5	21	13	12	5	10	12	6	6	13	10	3	20	8	6	4	19	8	2	1	0	1	0	0	0	0	0	1	0	0	2	0	0	0	1	0	1	0	0	0	0	0	0	1	0	0
PDGFRB	2	1	0	0	0	0	1	0	0	1	0	0	0	0	0	0	0	0	0	0	1	671	9017	2257	979	2313	1188	5299	578	2822	2461	2163	4339	5173	1725	2348	1723	2372	1825	1703	1704	1236	3535	1108	358	1291	2431	4436	1578
PDCD1	1	0	0	0	0	0	0	0	0	2	0	0	0	1	0	0	0	0	0	0	0	32	18	71	63	36	236	113	42	234	44	129	116	10	63	58	141	56	133	49	92	59	77	39	28	12	85	62	9
PCSK2	57	69	41	57	62	18	65	51	15	56	66	35	75	58	39	30	41	66	20	57	40	186	217	246	86	316	49	1245	47	206	327	130	152	977	169	315	81	426	621	429	110	0	0	2	0	4	4	1	1
PCSK1	0	0	0	0	0	0	0	0	0	0	0	0	0	0	2	0	0	0	0	1	0	67	175	180	139	99	86	189	54	233	137	85	175	205	177	197	237	190	75	403	272	275	50	32	111	13	79	10	12
ARG2	379	336	868	517	285	549	456	929	339	589	165	389	560	300	334	320	289	683	495	229	613	233	70	49	25	566	145	74	164	88	37	69	73	104	156	182	98	54	166	2742	45	229	218	31	20	26	178	213	135
AQP9	0	0	0	0	0	0	0	0	0	0	0	0	0	0	0	0	0	0	0	0	0	129	28	4	6	247	8	7	33	19	11	6	177	5	33	6	92	394	26	36	15	38	27	144	5	8	220	71	213
FASLG	0	0	0	0	0	0	0	0	0	0	0	0	0	0	0	0	0	0	0	0	0	76	45	19	76	67	161	30	11	89	65	54	52	7	24	102	51	39	337	58	25	21	10	32	1	3	27	14	2
APOH	0	0	0	0	0	0	0	0	0	0	0	0	0	0	0	0	0	0	0	0	0	24	14	34	34	18	15	28	13	28	25	20	24	9	11	26	29	27	6	23	21	22	65	1	2	1	9	20	3
BIRC5	0	0	0	0	0	0	0	0	0	0	0	0	0	0	0	0	0	0	0	0	0	2216	1683	969	1486	1614	1574	1880	256	1156	1297	987	2411	190	461	1771	1186	1051	1429	716	959	2005	5448	1868	585	514	1764	5457	3910
ANXA6	89	76	127	85	56	110	148	72	161	201	68	70	115	242	157	73	126	135	136	98	199	2905	6411	3602	2638	4718	5673	8060	1807	10966	7085	5288	8405	28770	2809	5473	4818	8658	5953	7095	4296	6229	2417	1588	711	1654	2008	2895	3674
IL22	0	0	0	0	0	1	0	0	0	0	1	0	2	0	0	1	0	0	0	2	0	0	1	0	0	1	1	1	1	1	0	1	52	0	0	2	0	4	3	0	0	5	0	0	0	0	2	0	2
VTN	0	0	0	0	0	0	0	0	0	0	0	0	0	0	0	0	0	0	0	0	0	3	59	4	6	5	20	23	1	40	8	13	24	18	12	6	14	11	7	30	15	4	5	3	0	9	5	20	46
VIM	664	744	1025	892	1170	695	1122	1131	957	1363	819	719	1097	991	851	876	678	923	1140	912	1179	9741	32942	17458	12700	20033	16396	35093	7014	32587	25111	20865	30744	40137	10956	22384	20196	25945	23265	20804	13328	4865	7611	3614	1214	3206	7975	8881	11218
VCAM1	0	1	0	0	2	0	0	1	0	0	2	0	0	0	0	0	0	0	1	0	1	427	1226	821	613	914	1651	864	635	2964	986	1401	1601	1545	566	1456	1331	1080	1290	1002	653	407	357	177	36	62	331	288	144
PRDX1	0	0	0	0	0	0	0	0	0	0	0	0	0	0	0	0	0	0	0	0	0	12902	7943	5295	6327	15235	10521	9497	6124	14847	8573	8549	13898	6833	11302	13096	9992	6905	9120	19691	5893	8752	14709	12286	877	2314	5746	16176	14284
GFAP	2	1	1	2	4	2	1	2	2	3	2	0	3	2	0	5	0	1	0	6	4	5	21	2	4	14	9	12	3	12	18	14	35	16	162	13	5	15	9	16	10	3	5	3	7	9	17	12	3
GBP2	0	3	0	0	0	0	1	0	0	0	0	0	1	2	0	0	0	1	0	0	1	1854	3853	2315	2395	4872	7221	4839	1868	6828	5220	3343	5436	8900	3114	5573	4193	4297	9094	9469	2481	2806	1405	3728	151	585	1201	1771	2146
ALB	0	0	0	0	0	0	0	0	0	0	0	0	0	0	0	4	0	0	0	0	2	0	4	0	1	1	0	2	1	1	17	1	0	3	2	3	12	3	2	3	4	3	1	0	0	0	3	0	0
SLC29A3	1476	2106	2361	2001	2388	1639	3516	1340	2307	3244	1930	847	2998	2637	3369	1685	2157	958	1922	2193	3033	405	456	409	419	732	503	365	246	946	543	699	662	290	337	796	708	291	575	176	487	435	332	274	82	328	319	846	382
OAS1	0	0	0	0	0	0	0	0	0	0	0	0	0	0	0	0	0	0	0	0	0	5685	4032	4811	5646	9604	9663	6982	3378	10979	6103	6260	6509	1122	9319	9153	6289	4538	8904	4082	3896	4997	4437	2338	430	957	1777	5093	4444
AGER	0	0	0	0	0	0	0	0	0	0	0	0	0	0	0	0	0	0	0	0	0	79	120	207	83	73	144	190	36	95	51	105	101	82	65	93	97	123	85	112	171	55	162	24	15	36	40	125	46
UNC93B1	8	18	13	12	13	6	8	8	8	8	6	4	9	14	5	7	10	15	12	12	14	1731	2749	2389	1737	3419	3019	2330	878	4248	3783	3365	2897	555	1609	3785	3637	1135	3781	4457	2355	1375	1235	2622	1040	2599	2593	4906	1842
TNFSF4	0	0	0	0	0	1	4	0	0	1	1	1	0	1	2	1	0	0	1	1	1	61	79	83	51	130	42	118	62	136	119	70	128	91	115	150	142	157	56	35	98	78	101	66	8	41	102	158	53
NOS1	0	0	0	0	0	0	0	0	0	0	0	0	1	0	0	0	0	0	0	0	0	22	63	10	8	88	15	34	92	39	146	29	147	2663	16	14	6	754	14	234	47	1	7	0	0	17	23	76	1
ACTG1	0	0	0	0	0	0	0	0	0	0	0	0	0	0	0	0	0	0	0	0	0	132932	186338	168739	111338	253834	185473	198280	75596	294341	278902	180175	281062	86278	163290	305707	292480	155034	199302	146854	229350	98613	304309	185308	44260	149474	129391	184750	225890
ACTA1	0	0	0	0	0	0	0	0	0	0	0	0	0	0	0	0	0	0	0	0	0	13	26	16	6	13	15	54	6	30	11	11	24	84	12	23	12	16	13	10	14	6	7	17	36	9	4	9	14
ACO1	460	757	647	598	663	569	683	744	820	848	406	358	824	705	540	447	721	402	804	473	657	2852	5055	2194	2251	6559	3691	4535	1982	4638	3758	3740	4366	4719	2834	5653	3953	3121	4326	7355	3296	3062	2508	1443	490	950	1448	4527	3010
SERPINA3	0	0	1	0	0	0	0	0	0	0	0	0	0	0	0	0	0	0	0	0	0	2	23	1	0	0	2	29	4	3	1	0	4	5	6	1	4	2	3	3	2	4	0	10	1	0	7	0	1
CXCR1	457	385	327	461	335	469	467	489	466	560	274	322	667	254	414	223	495	946	466	214	666	103	18	7	7	67	15	5	29	23	8	13	146	4	35	11	63	360	29	48	22	4	18	46	4	1	93	0	56
CCL15	0	0	0	0	1	0	0	0	0	1	0	0	0	0	0	1	0	0	0	0	0	1021	461	548	749	800	619	688	349	972	927	481	749	67	815	614	652	541	496	890	586	161	203	78	2	23	53	313	542
CCL14	94	181	263	232	142	183	186	103	166	212	96	66	158	197	131	236	135	103	223	97	323	71	214	194	134	216	80	160	57	215	78	171	248	157	114	164	135	209	131	287	120	15	24	5	0	3	9	7	9
CCL16	0	0	0	0	0	0	0	0	0	0	0	0	0	0	0	0	0	0	0	0	0	2	9	6	3	8	7	16	5	4	0	5	7	6	9	3	4	1	6	20	9	1	2	3	0	0	2	1	1
CCL19	1019	950	998	1190	981	900	1344	1241	855	1534	1276	1092	1662	979	1296	1112	733	1576	1044	855	1553	103	189	311	365	182	1666	732	223	5936	89	735	2004	38	530	579	951	887	621	91	592	32	61	23	25	8	69	2	5
CCL18	65	57	97	94	82	55	67	107	57	58	61	59	83	61	85	71	46	65	114	82	74	142	246	706	257	146	325	243	67	606	205	411	6058	100	300	154	258	143	784	443	283	45	149	486	34	118	1247	676	211
CCL17	3755	6290	4776	3807	5330	5077	5118	3744	4822	6171	4366	3173	6903	5911	5200	4103	4618	4325	4467	5392	5785	16	1	6	6	9	13	20	5	84	0	14	165	6	10	9	19	10	22	4	10	10	27	23	13	7	12	4	3
CCL26	0	0	0	0	0	0	0	0	0	0	0	0	0	0	0	0	0	0	0	0	0	9	9	14	18	2	7	15	1	4	4	5	2	9	4	9	11	12	2	11	10	6	13	124	2	1	475	23	51
CCL22	2	3	4	3	5	5	4	1	5	3	2	1	5	2	4	11	5	2	0	7	4	42	44	139	129	119	278	273	90	801	39	244	1197	13	222	135	294	259	256	105	230	50	148	486	62	31	89	76	135
CCR3	6	6	11	6	9	5	2	2	2	2	6	4	6	5	4	10	4	7	5	6	10	57	15	66	27	43	33	1	16	35	3	78	24	3	15	106	79	30	52	23	5	4	8	2	0	1	14	19	0
ACKR2	2	0	6	4	0	1	1	1	2	1	0	0	1	4	0	1	0	4	1	4	2	125	193	260	138	406	298	184	79	351	260	194	132	39	276	442	263	128	315	110	231	7	14	25	0	2	27	22	25
CCR7	0	0	0	0	0	0	0	0	0	0	0	0	0	0	0	0	0	0	1	0	0	60	55	165	188	126	394	227	121	2237	58	611	612	22	348	300	511	1092	341	82	329	28	104	76	14	17	89	14	31
CCL27	0	0	0	0	0	0	0	0	0	0	0	0	0	0	0	0	0	0	0	0	0	0	0	0	0	0	0	0	0	0	0	0	0	0	0	0	0	0	0	0	0	0	0	0	0	0	0	0	0
CCR8	4	3	0	0	6	0	1	3	3	3	2	1	1	0	1	5	0	2	2	1	0	1	2	5	4	10	5	4	3	4	2	12	32	0	2	5	8	3	6	3	1	3	11	8	2	1	8	17	6
ACKR4	1467	1317	2246	1471	1848	2203	1795	2158	1381	1780	1363	1313	2156	1865	1320	1381	1315	2245	2099	1037	1834	100	82	25	45	92	181	147	31	68	47	42	75	60	39	56	51	73	234	539	19	2	12	20	1	0	15	642	12
CCL2	0	0	0	1	3	0	1	0	0	0	0	0	0	1	0	0	0	0	1	4	0	1689	1116	520	617	638	621	465	594	671	648	590	1699	652	166	658	1129	1526	734	2262	721	178	117	739	87	65	328	147	354
CCL21	1061	2152	1311	1265	1611	1380	1726	743	1700	2053	1165	782	2115	2125	1770	1165	2103	1189	1172	982	2162	1672	5688	1481	1524	2574	1848	1769	526	10907	2516	2637	4156	2855	1914	2716	1712	4951	1452	2676	3978	120	356	323	64	221	1220	115	460
CCL7	1214	4456	1471	1243	690	1142	2127	168	2663	1674	694	420	2285	2568	1743	1013	2249	79	1015	1435	2258	19	5	8	17	8	20	2	4	12	3	9	12	0	0	18	30	4	7	2	4	0	1	16	0	0	13	3	15
CCL3	15	27	32	17	15	12	31	23	15	27	17	19	26	19	18	18	15	11	35	14	21	137	66	86	89	147	135	36	76	76	65	115	271	6	21	88	71	24	94	80	985	83	64	152	7	13	331	118	386
CCL11	347	463	658	658	634	394	479	520	573	666	528	348	557	639	503	507	335	512	701	465	541	588	300	213	295	1347	414	292	413	547	364	988	402	699	121	473	612	821	1098	793	47	31	138	92	44	14	106	2	26
CCR5	674	800	850	871	909	648	1148	577	705	1020	768	555	980	792	842	664	812	927	666	552	1259	242	248	265	366	381	962	280	112	779	393	493	542	133	226	475	311	204	1538	241	186	90	89	144	39	26	87	90	31
CCL23	2176	3842	3401	1773	3710	3382	3828	1698	2318	4490	2554	1872	3941	3503	2843	2843	3198	2552	1912	2632	3809	56	88	178	209	117	54	142	89	253	44	202	78	46	96	111	141	191	76	24	169	1	3	2	13	1	17	10	1
CCL25	0	0	0	0	0	0	0	0	0	0	0	0	0	0	0	0	0	0	0	0	0	4	2	1	1	11	19	4	0	9	3	7	4	1	2	0	9	1	16	10969	2	0	45	0	0	21	3	0	0
CCL4L2	0	0	0	0	0	0	0	2	0	0	0	0	0	0	0	0	0	0	0	0	1	102	57	86	42	214	201	40	13	43	92	79	264	13	70	75	198	67	249	155	562	76	30	106	25	11	490	71	214
CCL3L1	0	0	1	1	3	0	1	1	0	1	1	1	3	2	3	0	0	1	1	0	2	56	16	26	12	313	82	11	26	18	25	29	83	8	21	19	91	27	66	72	466	47	33	30	26	6	292	45	214
CCR1	3	2	5	1	2	2	9	2	6	12	3	1	5	6	16	3	7	1	0	8	6	338	623	520	255	493	712	182	177	725	406	497	1145	193	308	642	527	266	738	296	298	81	103	181	24	30	169	167	93
CCL24	0	0	0	0	0	0	0	0	1	0	0	0	0	1	0	0	0	0	0	0	0	592	222	710	643	733	204	112	74	447	1644	293	1042	23	380	1120	390	130	908	743	393	1359	180	99	156	158	276	1276	503
XCL2	0	0	0	0	0	0	0	0	0	0	0	0	0	0	0	0	0	0	0	0	0	45	24	24	37	29	70	3	6	43	53	21	33	3	7	94	36	26	45	35	17	3	1	3	0	2	7	1	0
CXCR4	0	0	0	0	0	0	0	0	0	0	0	0	0	0	0	0	0	0	0	0	0	864	739	2145	935	678	2200	2728	1299	6524	947	1601	2693	410	2456	1410	2544	2499	1919	766	2638	358	660	452	181	532	1402	3134	614
CXCR6	0	0	0	0	0	0	0	0	0	0	0	0	0	0	0	0	0	0	0	0	0	427	191	205	347	276	781	250	100	785	287	319	311	73	166	371	225	225	1612	316	137	159	114	96	73	27	127	89	13
CCR4	1	5	3	1	4	3	5	2	4	3	0	1	3	2	5	0	1	1	1	0	5	32	24	91	94	98	203	82	45	202	38	160	188	11	84	60	93	109	73	19	80	10	23	16	15	10	42	20	0
CCL15-CCL14	1194	3712	2183	1444	2462	2626	2692	615	3367	3797	1418	586	4257	4519	2669	2288	3836	1554	1539	2029	3687	57	65	106	150	145	96	108	52	165	164	107	109	20	144	168	165	95	124	422	137	20	16	3	2	3	14	12	45
PTK2B	0	0	0	0	1	1	2	0	1	1	1	1	3	0	0	0	1	1	1	1	1	3296	4427	6263	3438	7386	6874	5725	3039	11461	8670	7102	7092	1936	6113	10068	8264	4229	7222	12806	6573	2039	2012	663	412	571	1018	1654	1412
IL4	0	0	0	0	0	0	0	0	0	0	0	0	0	0	0	0	0	0	0	0	0	0	1	0	1	1	1	4	0	1	0	1	2	1	0	1	2	0	0	0	1	0	1	0	0	0	1	0	0
CDH1	0	0	0	0	0	0	0	0	0	0	0	0	0	0	0	0	0	0	0	1	0	16598	43230	36270	23595	74727	33633	35218	26323	60248	55868	44706	34492	4697	48579	73850	58174	29707	40218	41898	44790	16426	33971	6441	2083	7395	9339	41046	28447
LTBP1	0	0	0	0	0	0	0	0	0	0	0	0	0	0	0	0	0	0	0	0	0	883	4082	1694	1150	3205	1210	3323	1042	2895	2540	2122	3683	5394	2094	2860	2534	3556	2460	1737	2379	620	2165	626	196	1314	871	3981	2965
IL13	1	0	1	3	3	3	0	0	3	1	3	4	3	1	2	0	2	3	2	1	1	6	1	0	2	0	0	0	0	0	1	0	5	0	1	0	3	2	3	10	3	0	1	6	0	0	3	2	0
IL10	15442	20811	26536	25015	30854	22602	32643	28240	32093	37602	14317	16338	34431	27517	23844	16930	18750	20982	26112	18259	30891	64	72	38	40	32	71	28	19	44	24	46	88	13	29	36	41	40	63	30	85	5	1	11	0	1	17	17	1
IL2	0	0	0	0	0	0	0	0	0	0	0	0	0	0	0	0	0	0	0	0	0	8	2	13	6	3	2	2	1	7	3	5	7	0	5	5	1	3	8	8	8	0	0	0	0	0	2	0	0
PPARG	0	0	1	1	0	0	0	0	0	0	0	0	2	0	0	0	0	0	0	0	0	5150	4258	4141	4077	9911	5052	3480	3693	9768	5431	5411	4291	691	6857	11311	4192	3995	5151	3008	4502	1649	4769	1109	277	1265	1696	8062	2831
FGR	5868	10807	8189	5397	9401	11991	11631	4654	7578	13020	5527	3722	12542	11106	9374	7215	9206	5225	6179	8695	10585	283	247	364	297	326	402	413	134	417	197	475	817	181	172	283	389	494	373	228	235	52	147	140	30	78	306	141	134
MIF	78	118	106	112	182	110	115	127	123	147	117	52	169	159	94	101	71	109	173	195	132	1454	1622	1092	1259	1569	1142	1424	234	1952	1213	1274	1804	616	613	1556	1281	678	1104	1439	1283	1925	2837	1681	1491	1702	1668	1859	4777
CRP	32	38	165	91	138	8	66	35	54	69	64	22	69	6	5	159	45	4	51	128	154	0	1	0	0	0	1	0	0	0	0	0	0	0	0	1	0	0	0	0	0	1	1	0	0	0	1	0	1
JAK2	7	5	4	4	53	1	1	11	2	3	9	22	6	3	2	7	8	15	10	12	4	621	1046	902	522	976	1155	1016	544	1368	783	833	1224	950	743	1267	926	682	1013	1001	730	400	465	934	20	38	305	853	478
PTK2	518	496	1343	1022	1370	443	899	351	485	943	779	379	588	985	659	1079	285	956	588	682	815	2832	5495	3926	2761	5048	3523	4226	2298	6008	4297	4448	4433	3792	2985	5733	4374	3452	3616	5300	3839	6498	2747	1725	261	1148	1441	5617	3141
PTGDR	93	75	31	19	102	8	19	115	14	30	82	95	48	34	44	54	31	181	56	21	21	334	879	757	734	710	559	898	256	609	743	760	344	67	281	701	797	357	783	40	634	4	3547	21	0	6	39	16	218
CD86	9817	5983	3630	10758	8304	2934	6002	4219	5078	10376	7081	3074	5992	4047	4003	3317	2968	4881	6301	11530	9373	496	250	443	350	363	715	207	165	706	292	541	847	125	252	592	500	303	520	321	309	106	108	152	19	27	175	178	118
HCK	0	0	0	0	0	0	0	0	0	0	0	0	0	0	0	0	0	0	0	0	0	1397	2403	1404	814	1496	1635	945	488	1819	1004	1296	2194	342	656	2293	2128	1064	1937	803	1049	242	248	328	149	123	405	307	266
VDR	32	17	14	15	16	11	18	10	11	15	12	8	10	18	13	28	15	17	19	8	23	4431	10124	11735	6592	15631	8715	10283	5988	14070	16361	9845	10146	1360	12237	16524	15033	6921	11364	15817	13555	2135	7554	1296	395	2082	1735	6509	5692
OLR1	10	5	4	14	10	3	14	6	7	7	15	7	11	10	11	18	5	9	4	5	18	21	4	17	8	47	55	14	9	17	15	20	58	23	17	27	32	8	24	14	23	40	55	118	4	13	109	279	155
GRK2	6	7	3	4	5	3	4	1	25	4	1	3	17	0	0	0	1	9	9	9	2	5293	8586	8637	6035	7991	8602	7539	2997	12736	9131	8974	10509	3253	5176	10352	11557	4882	8809	8730	8593	7000	10204	3991	4255	8652	4012	8002	5101
TXK	0	0	0	0	0	0	0	0	0	0	0	0	0	0	0	0	0	0	0	0	0	51	53	64	36	58	62	81	42	94	41	81	58	12	90	103	90	84	45	78	45	23	17	5	1	0	9	22	8
RNASE2	0	0	0	0	0	0	0	0	0	0	0	0	0	0	0	0	0	0	0	0	0	8	28	9	4	15	30	13	5	4	2	9	24	10	11	9	23	17	14	6	7	14	15	12	0	2	10	7	12
CD79A	225	410	317	266	361	240	295	182	312	334	207	134	282	307	192	313	266	280	275	324	357	1090	498	1775	1674	1314	6309	1624	1565	9081	3099	5070	2772	95	1700	3136	5135	1487	4472	379	2047	183	160	42	608	57	321	16	17
CD79B	0	0	0	0	0	0	0	0	0	0	0	0	0	0	0	0	0	0	0	0	0	289	244	312	433	239	1645	703	216	3484	286	1195	1010	69	319	559	1139	474	498	160	547	66	82	20	64	34	90	27	12
LYN	9	16	19	20	24	8	15	7	9	15	21	12	12	14	19	31	10	17	9	21	18	2100	2010	1829	1435	2312	3270	1871	1180	4232	2177	2417	3431	514	1317	2817	2415	1557	2557	2962	1745	2098	1178	1822	142	295	1412	5660	2076
SYK	0	0	0	0	0	0	0	0	1	0	0	0	0	0	0	0	0	0	0	0	0	3346	4760	4245	2919	5691	5237	4028	2234	8331	4403	5838	5102	1095	2745	7556	6841	2967	4613	6373	4572	9440	2958	1158	490	1001	1926	6655	3001
BTK	0	0	0	0	0	0	0	0	0	0	0	0	0	0	0	0	0	0	0	0	0	415	297	591	367	389	1074	371	273	1590	305	790	718	126	317	656	687	383	617	206	442	60	74	30	3	11	54	77	37
BLNK	2	1	3	2	5	3	6	0	2	0	1	0	2	0	0	2	0	0	1	1	4	663	1206	976	778	1259	1518	955	653	1851	971	1711	971	114	790	1960	1697	838	1079	2415	892	551	490	209	41	62	269	737	238
VAV3	2	0	0	0	0	2	0	0	0	0	1	1	0	0	0	1	0	0	0	0	2	5448	6737	6428	6777	9500	5407	4567	4239	9761	7446	5788	4453	617	5596	13584	6417	4587	4643	3259	6752	5758	1986	284	120	801	498	1657	1324
VAV1	0	0	0	0	0	0	0	0	0	0	0	0	0	0	0	0	0	0	0	0	0	427	812	740	580	774	1386	597	287	1845	675	1103	1200	161	464	1063	1100	626	1129	362	846	104	168	99	119	95	139	132	51
VAV2	1	0	3	0	1	1	1	1	1	2	0	0	1	1	3	2	2	0	1	0	4	642	2306	2668	1780	3946	2101	2040	1555	5916	3769	2947	2435	973	4490	5391	4048	1967	2132	5994	3510	2420	2927	1597	377	344	1039	799	2609
RAC1	0	1	0	0	0	0	0	0	1	0	0	0	0	0	1	0	0	0	0	0	0	18933	16767	14932	14055	26362	17494	17683	10032	25547	20437	14831	21194	10952	16352	25699	18022	14965	19657	20050	15391	15113	13641	7240	2485	3990	6844	16218	27050
RAC2	129	110	246	175	183	89	149	106	172	223	132	57	157	186	117	217	66	170	156	156	212	1455	1923	2367	2413	2035	6419	2385	1001	9113	2934	4453	4017	471	1461	3215	4533	2394	5055	1436	2542	1210	1197	694	830	978	1180	1016	1754
RAC3	0	0	0	0	0	0	0	0	0	0	0	0	0	0	0	0	0	0	0	0	0	131	74	151	108	131	102	158	44	113	173	198	69	61	108	178	105	60	93	110	154	40	159	157	40	43	247	610	215
PPP3CA	459	348	745	520	836	323	605	203	300	688	687	295	551	573	451	731	432	577	324	499	671	1456	3266	2051	1802	3207	2323	2365	1497	4119	2927	2591	2516	1768	2147	4066	3295	2729	2317	2211	2242	2016	701	3281	167	388	1923	3507	1600
PPP3CB	0	0	2	1	1	0	0	0	0	1	0	0	0	1	0	0	1	0	0	0	1	2323	2291	1942	1607	2531	2017	2747	1194	2967	2703	1856	3135	5015	1703	2766	2260	3284	2040	3133	1997	1399	1307	919	98	308	831	1992	1397
PPP3CC	1754	1339	771	745	1039	507	1032	510	421	792	574	497	816	804	702	2392	405	2653	653	458	873	636	513	585	478	534	720	509	330	880	665	615	655	561	356	704	517	490	627	549	636	519	363	274	48	144	205	339	318
CHP1	0	0	0	0	0	0	0	0	0	0	0	0	0	0	0	0	0	0	0	0	0	15378	19413	14137	11770	39373	19679	16311	12679	36234	23710	18995	16562	4858	25959	40963	23323	12407	20674	24294	15140	1772	3577	4696	485	1708	6116	5385	9008
PPP3R1	0	0	0	0	0	0	0	0	0	0	0	0	0	0	0	0	0	0	0	0	0	1837	2364	1717	1668	2577	2068	2120	1260	3164	2445	2063	2728	1784	1708	2936	2388	2187	1858	2532	1809	1778	1573	1284	212	225	958	2961	3051
PPP3R2	0	0	0	0	0	0	0	0	0	0	0	0	0	0	0	0	0	0	0	0	0	0	1	1	0	1	0	0	2	0	1	0	1	1	0	1	0	0	1	1	0	0	0	0	0	0	0	0	0
CHP2	344	331	312	549	356	196	461	582	239	396	596	426	504	297	486	313	399	725	639	132	390	19367	11907	23106	8985	27927	17109	15434	9203	21804	22504	17998	13150	1369	16160	30605	18032	15447	17191	40119	20933	140	514	455	137	68	1394	3804	761
NFAT5	0	0	0	0	0	0	0	0	0	0	0	0	0	0	0	0	0	0	0	0	0	507	2675	1562	680	1382	922	2158	862	1394	1023	1217	859	1760	1690	1711	1334	1073	928	1353	1320	1754	1062	613	42	133	273	2732	620
NFATC1	0	1	2	1	0	0	2	1	0	0	1	0	1	0	0	2	1	0	1	4	0	286	438	335	219	376	673	524	140	1263	521	661	591	985	293	559	671	694	515	588	460	54	131	494	29	56	830	235	215
NFATC2	0	0	0	0	0	0	0	0	0	0	0	0	0	0	0	0	0	0	0	0	0	416	771	1118	565	931	1307	1279	371	2171	1056	1306	851	526	672	1406	1627	806	1875	916	964	971	651	85	79	206	171	122	233
NFATC3	6851	10830	7811	5792	9908	9516	10396	4619	8127	11959	8434	5377	13168	10536	9657	8256	9840	8381	6378	6892	10844	484	1045	704	401	1121	911	891	401	1327	870	865	797	1020	494	1243	1007	772	761	1510	838	486	477	429	36	382	416	1780	449
NFATC4	0	0	0	0	0	0	0	0	0	0	0	0	0	0	0	0	0	0	0	0	0	303	1265	695	318	402	334	1405	191	617	879	490	721	3137	331	492	540	1122	425	753	638	200	1015	76	116	251	267	439	465
HRAS	0	0	0	0	0	0	0	0	0	0	0	0	0	0	0	0	0	0	0	0	0	892	825	808	647	1287	1120	1304	448	1636	1566	952	1594	900	914	1373	1163	850	940	1245	911	376	1784	1178	501	698	787	504	1199
KRAS	0	0	0	0	0	0	0	0	0	0	0	0	0	0	0	0	0	0	0	0	0	2893	4417	3697	3723	4993	3932	3479	2822	5768	4805	3791	4647	2297	4130	6299	4591	3454	3485	3604	3890	1270	1612	1639	129	335	1072	2561	2923
NRAS	0	0	0	0	0	0	0	0	0	0	1	0	0	0	0	0	0	0	1	0	0	6231	4589	4508	3764	6801	4584	3871	2975	6926	5377	4426	5028	1179	4670	6970	5676	3930	3872	5144	3874	4342	2167	2242	76	354	1661	3852	3498
FOS	1	0	0	0	0	1	3	1	0	2	1	0	0	1	0	0	0	0	0	0	0	12881	32746	10252	7697	18044	10996	47068	17043	20575	26109	7136	39095	1185	14867	12016	17494	21503	35060	11077	65402	1211	26556	2484	2064	8036	16410	8591	9827
CARD11	1	0	0	0	1	0	0	0	0	0	2	0	1	0	0	1	1	0	1	1	1	147	191	331	275	295	1189	575	153	1899	310	825	785	54	361	656	804	427	1022	272	543	52	183	423	496	387	818	103	20
BCL10	358	311	513	492	679	407	433	552	332	496	389	308	389	617	381	493	276	426	655	501	488	2686	2733	3182	2410	3789	2672	2577	2333	5169	4265	2277	5558	571	4331	4237	5164	3468	3257	2574	4863	1104	1389	901	138	235	1320	2035	1916
MALT1	4	4	6	7	6	2	2	5	4	4	4	4	2	2	2	4	5	14	9	7	5	998	1206	1476	894	1326	1410	1348	817	2178	1259	1291	1666	727	1172	1659	1452	1090	1203	1114	1386	939	731	480	23	167	495	1130	1032
CHUK	0	1	0	1	1	1	0	0	1	2	1	0	1	0	1	1	0	1	0	0	0	1917	1512	1513	1087	2035	1406	1278	951	2044	1523	1287	2070	938	1374	2198	1722	1200	1279	2010	1408	906	917	768	63	176	562	1177	1012
IKBKB	0	0	0	0	0	0	0	0	0	0	0	0	0	0	0	0	0	0	0	0	0	1275	1924	2323	1108	1636	1642	2016	729	2284	1590	1944	1609	1269	1261	2578	2052	1275	1623	1716	2275	1912	1769	598	128	659	630	2805	813
IKBKG	4	2	1	0	1	1	2	0	0	3	1	0	0	3	0	1	1	0	1	1	3	198	260	277	168	268	240	273	99	334	249	227	373	252	158	346	348	189	256	271	301	179	257	63	61	51	73	760	120
NFKBIA	0	0	0	0	0	0	0	0	0	1	0	0	0	0	0	0	0	0	0	0	0	4067	5856	9263	3758	6363	5910	7338	4147	10419	7424	4548	8478	4004	6796	6688	6473	5640	6874	11930	8295	2305	4078	3517	863	1110	3009	3484	3810
NFKBIB	0	0	1	0	0	0	6	0	1	1	1	0	1	0	0	1	2	0	0	1	0	1088	1441	1398	1350	2081	1851	1985	736	2358	2546	1573	1944	685	1469	2360	2140	889	1863	2338	1712	739	1814	526	588	1147	778	2572	1363
NFKBIE	0	1	0	0	0	0	0	0	1	0	0	0	0	1	2	1	1	1	0	0	0	461	736	529	849	1150	990	817	457	1704	796	1027	1230	302	507	1004	1093	466	810	1177	863	539	1189	340	204	599	1139	729	1023
CD19	6	4	5	1	2	1	5	1	3	4	9	2	2	7	4	5	2	1	4	0	0	79	37	117	131	80	879	380	163	1729	89	551	426	17	287	209	592	301	311	44	349	18	58	6	24	9	24	13	1
CR2	1006	1733	1187	1281	1356	1426	1515	1673	1306	1773	968	943	1881	1342	1426	898	1457	1052	1553	655	1566	34	23	225	228	146	4165	2173	566	8020	181	1834	2420	17	1232	927	3714	654	643	435	1631	103	112	104	13	20	47	1	10
PIK3R5	0	0	0	0	1	0	0	0	0	0	0	0	1	1	0	0	0	0	0	0	0	471	578	715	259	462	804	455	202	714	455	781	574	133	486	876	790	398	736	351	408	44	125	81	14	12	167	85	66
PIK3R1	0	0	0	0	0	0	0	0	0	0	0	0	0	0	0	0	0	0	0	0	0	1885	4145	3420	1814	4602	2490	5245	2032	4640	4301	3358	2747	5898	3908	5713	4073	4202	3768	5667	2984	1521	1346	480	92	215	631	3245	1348
PIK3R2	0	0	0	0	0	0	0	0	0	0	0	0	0	0	0	0	0	0	0	0	0	21	63	20	33	64	39	71	25	80	62	59	28	19	30	66	65	31	38	80	45	44	61	42	9	10	22	47	129
PIK3R3	6	2	4	4	3	3	1	1	1	4	2	1	0	3	2	4	4	3	1	1	4	474	968	510	324	960	659	804	397	1462	754	539	894	1215	738	654	1103	623	926	896	454	406	787	311	37	157	228	2454	1074
PIK3CA	6	5	8	9	4	3	1	2	3	1	0	0	1	4	7	2	3	4	4	4	5	513	1221	762	474	1054	705	1188	524	1322	991	837	902	1507	829	1322	1006	990	738	924	820	551	544	442	3	116	267	1002	499
PIK3CB	4445	3485	4093	5536	4774	3617	6223	5264	4141	6180	3138	4041	6598	4061	5056	3059	2882	6428	5365	3671	6524	1367	3213	2742	1950	3769	2588	2461	1889	4442	3565	2804	3359	1164	2776	4345	3140	2265	2629	4506	2725	1527	1413	851	31	263	757	4422	2290
PIK3CD	0	0	0	0	1	0	0	0	0	0	0	0	0	0	0	0	0	0	0	0	0	254	641	610	555	872	1834	773	305	2551	593	1447	1077	643	510	1141	1222	1121	1704	582	857	141	185	161	45	64	272	213	127
AKT3	0	0	0	0	0	0	0	0	1	0	0	0	0	0	0	0	1	0	0	0	0	400	1103	618	376	829	479	1327	352	961	1185	536	1019	4385	439	753	532	1784	637	1134	580	187	194	236	6	79	261	382	197
AKT1	0	0	0	0	0	0	0	0	0	0	0	0	0	0	0	0	0	0	0	0	0	4553	6804	6206	4491	7984	5333	7924	2620	9050	8675	6605	8465	8366	3962	8658	7604	5549	6531	7513	7262	4632	6299	2536	1316	2391	3718	11977	4854
AKT2	1228	443	368	810	1260	375	305	1650	198	443	2017	1174	818	470	577	971	899	1568	1096	353	846	3131	5010	4408	2753	5059	4120	5263	1628	6104	5618	4625	5590	5018	3186	5842	5123	3949	4608	4861	4947	2651	4852	2479	1819	2541	2080	5733	3336
GSK3B	2648	6188	2974	1731	3004	3389	2959	870	3194	5567	2379	1143	2459	3603	3035	1704	4126	532	1266	2992	4951	1304	3466	2417	1524	3691	2374	3031	1539	3943	3221	3088	2829	2760	2616	4472	3237	2418	2669	4676	2785	2506	2002	1155	156	933	930	4029	2860
INPP5D	1209	1708	1595	1321	2291	1519	1751	1008	1274	2060	1574	803	2148	1724	1426	1937	1508	1632	1277	1681	1940	645	1373	1485	976	1680	2880	1732	671	4322	1118	2524	1591	478	1044	2156	2410	1207	2547	856	1422	2214	3058	402	393	120	377	4349	2212
CD22	946	2015	1613	1163	2027	1776	1934	1316	1256	2391	971	775	2316	1819	1442	1420	1520	1550	1179	1459	1792	55	71	226	309	169	2278	1323	362	4689	117	1504	881	41	677	590	1692	613	520	111	1051	36	72	27	4	14	61	40	14
CD72	45	70	82	64	58	45	72	77	61	44	44	31	63	48	46	34	49	57	86	54	76	66	81	108	76	75	533	188	111	1183	50	251	277	23	131	151	322	126	264	69	157	67	60	31	17	38	64	47	34
PTPN6	2	13	26	9	9	6	3	4	8	6	0	4	4	7	2	16	2	7	3	3	7	2206	2627	2988	2481	3187	5069	3075	1445	7009	3249	4935	4107	514	1979	5102	4437	1989	3923	2577	2990	2250	2162	678	593	1701	918	3279	1564
LILRB3	53	21	27	49	61	12	36	122	14	40	97	99	58	21	41	56	25	100	53	17	47	79	86	91	47	44	117	67	22	41	50	50	218	45	44	56	78	61	86	35	36	17	23	29	11	1	69	19	95
FCGR2B	0	0	0	0	0	0	0	0	0	0	0	0	0	0	0	0	0	0	0	0	0	396	435	396	434	345	278	328	104	618	352	318	650	227	329	571	354	305	288	192	212	28	31	66	15	67	168	73	50
RASGRP3	0	0	0	0	0	0	0	0	0	0	0	0	0	0	0	0	0	0	0	0	0	236	350	646	366	553	1094	283	263	851	334	777	828	178	304	638	706	340	539	228	517	197	185	191	16	38	96	506	136
PLCG2	15328	42148	21440	26003	18650	33127	34433	30886	41012	42068	12796	12965	41375	35984	33091	16092	38702	8849	41028	22845	30541	576	3600	1414	619	2014	3238	1891	1068	3800	1349	2763	1731	745	1195	2642	3704	1399	2144	1435	1372	219	152	147	64	56	173	122	382
PRKCB	0	0	0	0	0	0	0	0	0	0	0	0	0	0	0	0	0	0	0	0	0	492	435	836	313	1038	1922	1300	555	2988	1107	1309	1297	3873	894	1243	1107	1796	1526	1317	909	63	75	65	17	12	124	54	30
IFITM1	42	11	16	22	304	22	33	22	17	51	48	91	50	27	155	32	20	139	37	29	27	3829	5487	2145	2579	3826	5476	9268	1290	5252	3169	4386	7936	1607	1670	4954	3584	2628	5819	4035	1881	12438	12510	5895	4287	10398	2574	7658	21825
C3	1628	2462	2450	1806	3375	2242	2551	2110	1900	3059	2058	1555	2621	2258	2153	1921	2144	2409	2116	1636	2278	2396	86554	3101	2216	7969	10286	38277	2544	24098	7519	10822	15325	21264	8633	8838	7731	17688	11993	9490	6869	3049	9297	1066	2675	6723	2138	602	2226
C5	0	0	0	0	0	0	0	0	0	0	0	0	0	0	0	0	0	0	0	0	0	90	186	141	103	142	91	150	35	138	122	125	100	270	59	166	140	165	124	277	126	167	127	20	2	15	61	1128	152
CKLF	0	0	0	0	0	0	0	0	0	0	0	0	0	0	0	0	0	0	0	0	0	643	276	264	414	378	303	278	152	437	297	275	494	156	203	346	310	262	371	427	234	482	340	97	64	40	94	1205	370
CMA1	0	0	0	0	0	0	0	0	0	0	0	0	0	0	0	0	0	0	0	0	0	100	104	45	77	72	76	103	31	190	72	46	148	67	83	146	152	177	179	105	153	0	2	0	1	0	10	4	0
CX3CL1	0	0	0	0	1	0	2	2	0	3	0	0	0	1	0	0	1	0	0	0	2	551	1132	680	462	737	555	2789	335	2202	723	694	958	1283	661	755	1736	1304	820	1081	958	664	1479	269	116	252	854	3639	441
CXCL17	0	0	0	0	0	0	0	0	0	0	0	0	0	0	0	0	0	0	0	0	0	0	3	0	0	1	7	2	0	0	1	0	7	0	8	2	0	0	1	1	0	3	0	128	4	1	31	135	12
EDN1	0	0	0	1	0	0	0	0	1	0	0	0	1	1	1	0	0	1	0	0	0	693	754	727	1080	2273	553	757	500	2684	589	967	567	368	1004	1843	845	500	972	1192	845	407	358	136	73	567	1128	806	711
EDN2	0	0	0	0	0	1	0	0	0	0	0	0	1	0	0	1	0	0	0	0	0	222	219	275	210	1489	48	158	374	369	363	377	12	15	158	576	448	160	393	4232	339	22	349	16	1	26	138	866	75
EDN3	0	0	0	0	1	0	0	0	0	0	0	0	0	0	0	0	0	0	0	0	0	2192	2705	3945	2674	3874	2748	2521	1519	4519	5386	2454	2444	336	3260	5579	3873	2516	3417	8213	4131	81	45	200	176	44	304	143	57
FGF10	437	173	185	142	503	149	188	444	188	234	613	283	448	386	217	398	265	371	275	344	367	111	196	43	42	52	28	235	23	87	95	43	186	247	72	64	55	131	54	105	41	2	5	1	0	1	18	13	3
LECT2	27	38	50	33	45	23	39	47	37	32	39	19	42	30	28	28	16	43	45	17	28	0	0	0	0	0	0	0	0	0	0	0	0	0	0	0	0	0	0	0	0	1	0	0	0	0	0	0	0
PROK2	2211	3220	2207	2205	3300	2345	3115	2013	2357	3639	2893	2171	4152	2608	3106	2852	2920	2540	2766	2165	4256	20	7	0	6	97	10	5	3	11	6	7	25	7	6	3	19	116	8	21	1	14	5	18	0	0	6	2	19
SAA1	9	5	14	2	8	7	7	0	3	4	5	1	2	3	1	5	6	3	0	10	5	53	175	1	3	380	132	88	87	43	50	31	376	10	24	78	76	399	103	318	2	862	435	251	66	11	31	29	500
SAA2	0	0	0	0	0	0	0	0	0	0	0	0	0	0	0	0	0	0	0	0	0	4	59	0	0	8	96	13	17	5	4	1	127	0	3	6	1	41	96	23	2	284	122	53	9	1	9	26	216
SBDS	0	0	0	0	0	0	0	1	0	0	0	0	0	0	0	0	0	0	0	0	1	7433	4407	6134	4627	8120	4878	4569	3761	8120	7170	4302	8041	6043	5870	7862	6264	6858	5142	9508	5944	7080	2864	1445	300	672	1685	3326	4675
SEMA3A	291	486	421	291	524	401	405	435	362	509	261	186	505	520	326	328	430	328	436	277	411	178	543	257	136	337	153	601	216	406	567	243	452	4441	255	355	227	1540	151	477	314	486	209	751	16	178	262	444	157
SEMA3B	1	0	1	0	2	0	0	0	0	0	0	0	0	0	0	0	0	0	0	0	1	2285	3017	5323	2547	8504	2890	4417	2176	7460	5854	4840	3288	3342	5593	4980	5290	2762	3680	24916	4836	907	1307	1194	387	627	2511	3000	3823
SEMA3C	0	0	1	0	0	0	1	2	0	0	0	0	0	3	1	0	0	0	0	0	0	2369	5442	2977	2765	5148	2513	4849	2764	4811	5433	2936	3745	12540	2879	5687	3481	6096	3013	2713	3522	5035	2357	251	113	470	453	3474	3676
SEMA3D	229	258	157	194	201	136	191	60	186	168	197	54	205	219	144	204	189	164	145	160	198	114	248	300	223	260	85	364	121	228	206	221	127	362	169	287	191	262	166	315	304	7	7	13	0	3	19	15	12
SEMA3E	1	0	0	0	0	2	0	1	0	2	3	3	0	0	1	5	0	1	0	1	1	116	295	207	191	232	57	320	67	211	276	138	213	870	157	188	96	452	148	266	187	0	1	3	1	0	15	64	1
SEMA3F	0	0	0	0	0	0	0	0	0	0	0	0	0	0	0	0	0	0	0	0	0	319	1537	1254	861	772	695	1192	255	1083	1208	1046	1583	884	326	1034	975	738	791	1362	1092	1421	3015	1112	308	866	935	1764	3019
SEMA3G	2582	3902	3620	2460	3861	3395	3627	1670	2869	4580	2821	1641	4433	4544	3523	3412	3114	2655	2693	3103	3651	237	1742	573	403	845	494	1729	259	1613	1338	1037	948	1016	613	1145	507	1048	1038	4900	753	203	205	67	4	63	63	133	228
SEMA4A	2799	3973	5440	3171	8250	3849	4360	4120	1935	4604	3340	2559	5109	5299	2598	4298	2024	5164	2873	3393	3434	381	648	819	520	699	1831	545	468	1476	942	1832	1334	124	413	1019	1950	454	1256	185	696	605	402	164	63	402	257	446	115
SEMA4B	0	0	0	0	0	0	0	1	0	0	1	0	1	0	0	2	0	0	0	0	1	3434	7356	6352	3682	9502	6696	8280	3591	8998	7853	7638	10127	6384	7402	9853	9369	4300	7508	7315	6759	1583	5988	3313	960	2790	5833	14108	5970
SEMA4C	0	0	0	0	0	0	0	0	0	0	0	0	0	0	0	0	0	0	0	0	0	509	1827	1389	711	1104	677	1820	408	1498	1580	1266	1643	5774	733	1388	1121	1993	1009	1677	1567	453	2357	715	600	2079	619	1482	1332
SEMA4D	0	0	0	0	1	0	0	0	0	0	1	0	0	0	0	0	0	0	1	0	0	701	1391	1696	907	1646	3239	1616	853	3284	1435	2712	1774	531	1305	2379	2489	1395	2848	1200	1560	1584	1133	849	316	677	825	3448	1598
SEMA4F	5	1	6	5	6	2	8	5	4	5	9	3	4	5	4	6	1	4	3	0	5	153	365	250	204	241	224	461	100	405	270	278	322	371	136	386	306	278	270	129	264	351	381	214	58	187	262	706	580
SEMA4G	29	14	34	42	7	19	23	2	30	28	17	10	19	27	29	42	7	17	13	19	40	2536	7337	8883	5741	7268	4800	5933	3085	8762	9417	7233	5005	750	4812	8789	8722	3346	4472	7800	11264	1160	1571	994	328	815	2300	3105	2736
SEMA5A	40	60	94	40	106	41	36	28	46	58	79	12	47	48	45	120	40	83	27	68	83	2414	4142	2518	1893	7619	3280	3382	2744	4789	3735	3982	1519	602	5514	7714	5164	2396	3859	5186	3950	1900	3508	165	152	672	448	1942	1765
SEMA5B	1	2	2	1	1	1	1	0	1	1	0	0	2	0	0	0	2	0	0	0	0	11	58	95	47	67	20	102	18	44	32	79	61	58	36	48	45	35	37	18	41	21	51	5	21	33	15	23	39
SEMA6A	0	0	0	1	1	0	2	0	0	1	1	0	0	0	0	0	0	1	0	0	0	1856	7005	5983	2920	8833	4937	4051	3529	7536	6975	5473	4369	3334	6730	10383	7580	4748	4414	11291	7309	310	1361	237	81	26	311	513	243
SEMA6B	91	104	162	85	130	97	77	14	126	150	128	29	116	177	80	158	96	71	75	134	143	364	1302	742	198	364	362	444	113	837	592	479	717	325	466	621	756	358	609	492	493	156	312	302	107	145	277	217	446
SEMA6C	0	0	0	0	0	0	0	0	0	0	0	0	0	0	0	0	0	0	0	0	0	70	652	268	134	237	103	404	59	354	314	249	215	807	116	339	208	281	216	925	262	87	116	31	29	135	75	198	68
SEMA6D	0	0	0	0	0	0	0	0	0	0	0	0	0	0	0	0	0	0	0	0	0	1439	3205	2502	1384	3646	3226	2301	1624	4346	3409	2308	2415	772	2640	4187	4021	1847	4012	8803	2310	152	435	134	29	17	181	40	108
SEMA7A	0	0	0	0	0	0	0	0	0	0	0	0	0	0	0	0	0	0	0	0	0	115	500	223	188	311	838	628	159	1451	173	569	618	100	278	448	608	315	540	179	493	70	1029	192	61	174	425	526	294
SLIT1	153	198	219	216	135	173	258	207	185	270	124	147	224	161	180	145	200	157	239	106	223	25	94	41	7	41	30	50	31	44	36	46	23	225	13	51	56	85	38	40	46	10	5	3	0	5	5	32	16
SLIT2	1	1	0	1	0	0	2	1	0	0	1	0	0	2	0	3	0	2	1	4	1	263	702	393	206	859	336	979	301	633	896	598	765	4580	374	643	493	1336	653	1008	430	14	49	26	30	149	96	69	88
TNC	0	1	1	0	1	0	0	0	0	1	1	0	0	0	0	0	0	1	0	0	0	3392	3246	1632	435	2730	499	9054	1621	909	9072	1209	6404	75679	1447	921	749	14332	2805	11527	2962	745	2896	3909	310	1136	5129	2846	1792
TYMP	0	0	0	0	0	0	0	0	0	0	0	0	0	0	0	0	0	0	0	0	0	1732	2038	1458	853	1584	5026	3001	792	2744	1868	1792	3597	564	1207	1355	2438	586	6040	2459	1012	593	2731	2330	1060	886	2435	1823	862
C5AR1	163	167	211	235	298	120	273	236	188	254	166	156	249	221	216	223	116	183	236	164	325	353	945	577	209	429	475	420	258	378	407	409	1275	183	364	300	931	959	539	418	754	99	225	200	65	108	377	736	293
CCR9	994	1843	1813	1751	2067	1295	1544	1816	1460	1797	1297	1027	2140	1722	1330	1098	1081	1538	2166	1046	1492	7	29	19	48	25	54	9	11	46	26	36	8	5	6	35	14	29	27	169	25	8	2	4	3	1	7	1	12
CCRL2	108	203	1098	117	209	132	181	95	134	282	108	46	192	224	128	195	111	85	142	208	240	1265	725	788	731	1400	876	671	591	1459	1008	792	1420	102	921	1344	1403	685	973	1435	918	433	522	284	128	218	357	1288	616
CMKLR1	50	70	59	60	41	32	59	61	87	82	48	30	67	79	71	47	51	63	90	49	69	726	1039	1274	471	1105	1574	581	327	1460	853	1382	1589	660	703	1529	1407	671	1720	642	814	102	132	123	42	31	130	132	75
CX3CR1	0	0	0	1	0	0	0	1	0	0	0	1	0	0	0	0	1	0	0	0	0	43	93	80	74	293	159	44	33	140	63	160	233	132	32	144	92	148	103	87	89	36	11	17	0	17	17	11	4
CXCR3	0	0	0	0	0	0	0	0	0	0	0	0	1	0	0	0	0	0	1	0	0	199	224	183	256	320	656	258	103	513	386	374	454	30	229	376	316	147	969	537	184	230	130	83	262	196	84	147	61
CXCR5	890	1194	994	874	1238	1003	1254	981	718	1349	1230	783	1433	1041	915	1089	873	1151	818	783	1228	3	1	4	16	13	126	26	13	252	7	70	45	3	34	29	77	23	21	7	52	1	0	3	0	6	7	0	1
ACKR3	15102	44198	22235	17864	21786	20849	31468	12464	34178	41913	14025	10603	28679	30607	29051	17236	49806	8403	23560	16236	31706	1325	2018	1365	436	1227	697	2241	650	1656	1992	774	2063	1461	949	1099	1496	2409	1001	2752	2383	355	277	127	213	431	392	330	380
CYSLTR1	0	0	2	0	0	1	0	0	0	1	0	1	1	2	1	0	0	2	1	0	4	237	201	297	204	233	302	100	108	487	195	284	257	84	155	373	269	241	252	138	203	29	27	13	4	2	32	16	9
CYSLTR2	0	0	1	2	1	0	0	0	0	1	1	1	1	0	0	0	0	0	0	1	0	48	41	103	48	87	119	43	35	165	77	114	64	58	46	141	133	74	133	159	46	8	7	4	0	3	6	353	4
ACKR1	7	7	22	14	22	8	17	8	7	19	28	4	29	12	13	19	9	17	6	12	25	700	3839	761	1005	1245	657	1447	304	3648	1381	1059	3743	1301	462	731	704	2470	1102	1725	1084	40	176	140	52	30	251	5	54
EDNRA	1616	2262	3083	1695	2718	1989	2552	1164	1685	3068	2032	1115	2758	2868	1927	2773	1863	2104	1444	1780	3379	60	655	160	101	266	61	383	75	215	123	209	194	322	120	164	119	196	164	138	89	264	287	112	18	69	167	317	203
EDNRB	1020	1360	1229	1314	1114	1032	1933	743	1379	2077	920	767	1897	1491	1620	1024	1161	1011	1401	1019	2016	1266	1709	1705	773	1478	903	1011	813	1374	1170	1194	1268	586	851	1823	1615	760	1268	1214	893	435	234	89	22	35	200	117	49
FPR1	0	0	0	0	0	0	0	0	0	0	0	0	0	0	0	0	0	0	0	0	0	406	321	144	52	214	202	47	132	164	66	78	869	80	112	49	324	583	203	141	85	38	83	211	30	63	491	76	84
FPR2	2	1	0	2	1	0	1	0	2	1	3	0	1	0	1	2	1	0	0	0	4	96	24	27	11	94	25	11	18	25	9	9	173	5	33	4	70	140	28	35	6	7	9	97	1	4	109	8	45
GPR17	0	0	0	0	0	0	0	0	0	0	0	0	0	1	0	0	0	0	0	0	0	18	61	65	9	53	26	107	34	27	89	38	57	288	29	43	22	99	72	77	190	11	37	0	0	2	7	12	5
GPR32	1308	3161	2258	979	2398	2108	2743	1260	1365	3427	1294	842	3151	2711	1830	1663	2503	1348	1216	2750	1650	0	0	0	1	0	0	0	0	0	0	0	0	0	0	0	0	0	0	0	0	0	0	0	0	0	0	0	0
GPR33	0	0	0	0	0	0	0	0	0	0	0	0	0	0	0	0	0	0	0	0	0	0	2	3	2	4	3	1	1	2	0	3	0	0	0	2	0	1	1	1	0	0	0	0	0	0	0	1	0
PTGDR2	37	56	47	50	132	47	60	43	36	57	53	26	75	64	33	52	50	70	76	29	47	416	801	678	239	543	321	711	168	728	690	710	232	77	313	903	699	294	1185	455	389	34	58	21	31	9	59	72	5
C5AR2	15	13	31	23	15	8	16	9	17	35	7	16	41	43	15	2	20	14	22	24	15	85	134	155	50	56	88	87	50	45	68	71	94	22	105	64	88	71	66	59	123	30	34	20	58	4	34	17	36
CXCR2	3	5	13	2	1	5	2	4	2	12	0	1	2	12	3	1	6	0	12	1	2	119	21	23	12	117	35	2	35	29	24	37	147	8	40	40	98	472	47	38	31	11	14	57	0	7	63	8	49
LTB4R2	0	1	2	0	1	0	0	0	0	0	0	0	2	0	1	0	0	0	0	1	0	24	46	88	15	33	42	85	15	38	29	50	29	24	55	43	63	27	36	66	55	54	163	14	1	16	13	78	19
PLAUR	0	0	0	0	0	2	0	1	0	1	0	0	1	2	0	1	0	1	0	0	1	2177	1258	1880	1064	2733	2214	1409	1313	2709	1983	1283	7120	301	4352	2428	3618	2035	3184	1016	3341	804	3531	3532	734	2669	3968	2253	3637
PLXNA1	0	0	0	0	0	0	0	0	0	0	0	0	0	0	0	0	0	0	0	0	0	759	2665	1691	740	2050	1365	2675	779	2385	1779	2253	2393	1975	1122	2047	1810	1070	1548	1512	1592	1601	3097	1641	524	1442	1820	3513	2624
PLXNA2	6	5	14	9	17	8	3	5	7	7	11	4	18	20	13	8	4	17	9	6	3	2101	7038	6757	3333	8500	5318	5666	3180	9817	8315	7191	4325	1723	7993	11159	8493	4453	5684	9838	8134	1514	1935	397	282	956	974	3983	1650
PLXNA3	49	66	63	71	307	72	157	122	30	49	84	64	127	51	67	16	23	85	46	257	110	395	1327	2400	869	1390	1753	2109	544	2074	1877	2104	877	1009	1057	1521	1728	1004	1591	772	2118	1307	1845	710	386	1735	945	3116	1037
PLXNA4	0	0	0	0	0	0	0	0	0	0	0	0	0	0	0	0	0	0	0	0	0	28	465	106	39	207	53	541	35	163	153	165	160	295	105	189	76	162	172	196	174	40	103	13	5	43	45	278	36
PLXNB1	2639	4004	2896	2059	4771	3046	3727	986	2996	4315	2384	1106	4896	3824	3210	3104	2653	2804	1555	5278	4159	2260	4842	5271	2408	4559	2977	5519	1906	5269	4552	4250	3269	4024	3310	5836	4718	2601	3300	4753	6257	4534	7041	1200	1099	4668	1244	10510	2509
PLXNB2	14514	41360	20713	14475	25563	23637	33303	5312	22628	38779	13376	7249	29918	35738	26670	16819	25446	9292	14526	15618	28846	5625	25149	18568	10145	24938	18250	18344	7614	27574	29141	23250	19389	11481	16741	31310	22381	10441	21540	28137	21078	6606	16731	7053	2532	5946	13536	23699	15262
PLXNB3	0	0	0	1	2	0	1	1	0	1	0	0	0	2	0	1	1	0	0	1	1	51	147	94	32	98	32	714	42	40	173	57	164	1539	59	80	49	381	113	214	193	84	27	24	14	34	44	1168	11
PLXNC1	0	5	4	5	4	2	3	2	2	5	8	5	18	9	5	1	7	10	2	6	6	678	971	1254	730	973	1234	498	396	1304	871	1308	1230	299	528	1428	1190	643	979	504	770	128	317	159	20	53	216	475	106
PLXND1	2799	5649	3164	3864	3418	3519	4362	4745	3920	4876	2540	2530	4974	3775	3710	2377	4854	2448	5197	2254	4238	828	5701	2875	1336	2923	2052	2940	713	3860	2895	3806	4009	3176	1634	3390	2756	2321	3282	1923	2527	2168	1762	710	415	669	1798	6917	1768
PTAFR	133	70	136	150	143	90	188	117	118	130	110	102	179	109	118	156	69	141	120	79	136	488	588	837	400	761	1112	445	264	1266	765	1053	1556	295	329	1019	989	712	1163	508	653	125	238	410	65	76	465	597	298
ROBO1	3956	8024	6922	5771	8562	6359	9036	3041	5546	10936	4819	3177	9277	8649	7114	6051	6219	4433	4248	6413	9093	324	921	545	329	946	620	1234	315	1262	716	686	830	2691	530	809	820	1188	875	1625	684	219	401	159	46	91	233	402	216
ROBO2	0	0	0	0	0	0	0	0	0	0	0	0	0	0	0	0	0	0	0	0	0	30	52	25	22	83	20	173	19	120	41	69	50	105	73	85	72	56	75	245	42	29	290	6	2	309	62	273	3
RXFP3	5	6	5	4	8	4	9	11	13	11	2	6	15	10	7	6	8	8	2	5	9	0	0	0	0	0	0	0	0	0	0	0	0	1	0	0	0	0	0	0	0	0	0	1	0	0	1	4	0
XCR1	0	0	0	0	0	0	0	0	0	0	0	0	0	1	0	3	0	0	0	0	1	35	109	40	93	142	239	38	35	124	107	199	58	25	51	92	123	45	323	118	78	8	11	21	0	1	9	7	2
ADM	0	0	0	0	0	0	0	0	0	0	0	0	0	0	0	0	0	0	0	0	0	398	1812	1525	1007	2173	1198	1023	502	1010	1098	771	4960	293	1075	1684	969	476	1208	976	1841	230	1103	1095	99	503	1061	2838	1154
ADM2	154	78	54	55	291	52	89	111	123	96	106	87	86	97	133	107	29	121	71	76	84	108	335	279	259	240	498	149	106	579	450	433	418	37	242	269	487	133	409	1664	354	300	512	129	85	147	480	923	305
AGRP	0	0	0	0	0	0	0	0	0	0	0	0	1	0	0	0	0	0	0	0	0	1	4	1	1	3	2	6	0	1	0	4	0	1	4	2	2	0	1	3	0	0	4	0	0	3	0	2	0
AGT	0	0	0	0	0	0	0	0	0	0	0	0	0	0	0	0	0	0	0	0	0	171	725	285	228	258	308	277	121	70	217	367	534	131	195	214	216	196	364	2216	266	770	1040	107	327	324	395	234	28
AMBN	0	0	0	0	0	0	0	0	0	0	0	0	0	0	0	0	0	0	0	0	0	0	0	0	0	0	0	1	0	1	1	0	0	0	0	3	0	0	2	0	0	1	0	0	0	0	0	7	0
AMELX	0	1	0	1	0	0	1	0	0	0	2	1	0	0	3	1	0	3	1	3	5	1	0	0	1	2	0	2	0	0	0	0	0	0	0	0	0	1	0	1	0	21	5	0	13	16	0	0	0
AMH	0	0	0	0	0	0	0	0	0	0	0	0	0	0	0	0	0	0	0	0	0	5	3	33	2	8	15	32	4	8	5	17	6	1	8	20	30	6	12	17	14	119	45	178	51	454	21	432	5
ANGPTL5	1	2	2	0	3	0	1	4	3	0	0	2	4	4	3	1	2	7	2	2	7	16	15	6	21	6	4	8	7	36	10	10	5	19	6	3	2	64	9	8	4	1	2	0	0	0	0	4	0
ANGPTL7	146	149	49	109	405	98	156	182	276	347	252	186	79	57	637	98	190	244	86	266	507	50	56	42	38	148	47	201	29	231	188	48	131	540	40	124	36	310	173	273	67	0	0	1	0	0	8	5	1
APLN	954	1219	1706	1201	1876	1259	1659	983	899	1749	1202	896	1609	1253	1428	1553	1153	1692	1059	745	1611	51	45	15	9	33	45	134	21	40	48	16	164	96	16	85	44	40	40	41	22	383	212	226	117	79	129	995	366
AREG	0	0	0	0	0	0	0	0	0	0	0	0	0	0	0	0	0	0	0	0	0	1397	431	1221	361	696	417	795	1024	736	1640	240	4765	52	1844	540	1679	1993	951	343	5690	1915	7388	4079	174	975	1067	2393	2013
MANF	0	0	0	0	0	0	0	0	0	0	0	0	0	0	0	0	0	0	0	0	0	3079	2280	2265	1674	2216	2848	2093	1385	3292	2522	2236	6221	1029	1389	2228	2775	1468	2753	1050	1776	1783	4230	3223	836	586	2161	2539	5431
CDNF	5	5	9	2	5	2	6	4	2	4	5	1	5	5	2	2	7	8	2	3	5	48	45	62	37	70	42	57	25	78	56	48	35	36	45	81	45	28	38	125	57	41	12	8	2	2	6	75	12
ARTN	2	4	5	1	1	1	2	2	0	2	6	0	1	2	0	6	1	1	1	2	3	14	95	83	63	27	109	70	35	60	62	57	97	17	85	44	90	20	64	7	46	44	129	43	20	24	50	91	64
AVP	0	0	0	0	0	0	0	0	0	0	0	0	0	0	0	0	0	0	0	0	0	0	1	0	0	0	0	0	0	0	0	0	0	0	0	0	0	0	0	0	0	0	0	0	0	0	0	0	0
BDNF	0	0	0	0	0	0	0	0	0	0	0	0	0	0	0	0	0	0	0	0	0	22	24	47	6	19	11	21	18	22	20	5	29	18	27	6	21	22	24	10	24	18	28	293	3	50	21	72	5
BMP1	0	0	1	0	0	0	1	1	0	1	0	0	1	0	0	0	0	0	0	0	0	1045	3074	2562	1591	3370	1985	2816	1076	3351	3471	2432	2159	1418	2387	3861	2601	1276	2380	2324	2792	919	1931	865	197	674	1435	1971	1822
BMP10	11	8	53	10	30	10	14	1	25	21	38	12	19	45	14	19	4	11	8	18	47	0	0	0	0	0	0	2	0	1	0	0	0	0	0	0	1	0	0	0	0	0	0	0	0	0	0	0	0
BMP15	210	78	82	72	143	27	45	103	24	101	239	236	99	45	174	252	129	284	98	124	67	0	0	0	0	0	1	1	0	1	0	0	3	0	0	0	0	0	0	0	0	0	0	0	0	0	0	0	0
BMP2	24	35	234	24	46	19	43	22	21	50	28	23	29	29	35	41	12	25	24	25	33	1732	1759	3548	2076	3827	2254	2853	2045	4838	4891	2142	2631	333	5079	4117	4196	3657	2717	2933	5007	177	443	338	132	308	760	2046	575
BMP3	0	0	0	0	0	0	0	0	0	0	0	0	0	0	0	0	0	0	0	0	0	605	1880	2334	1818	4599	579	1961	2076	6251	7290	2767	826	3924	5050	6447	4719	3912	1758	3994	2918	2	23	84	1	3	216	4	1
BMP4	0	0	0	0	0	0	0	0	0	1	0	0	0	0	0	0	0	0	0	0	0	516	1268	1114	1321	1196	1030	882	393	1138	1133	1321	1100	807	420	1981	634	571	1161	572	1274	6869	2696	1003	499	798	1875	4740	7560
BMP5	0	0	1	1	1	0	0	0	0	1	1	1	2	0	1	0	0	0	0	1	0	486	687	998	655	567	570	627	273	803	633	482	470	47	504	1336	865	515	632	618	685	195	29	8	1	13	39	25	0
BMP6	34	29	52	52	68	23	22	15	23	22	24	15	28	26	24	69	21	38	14	36	49	360	444	550	148	483	482	127	220	563	571	640	541	168	209	572	694	182	606	182	189	22	28	38	36	11	70	18	35
BMP7	2585	5607	2254	2329	2510	3865	4331	2055	4070	3693	1521	1528	5453	3503	3512	2100	3926	1749	2677	1842	4154	70	257	130	81	190	209	298	102	186	146	145	244	372	212	200	204	212	191	159	157	604	1017	237	106	188	1039	5051	6684
BMP8A	0	0	0	0	0	0	0	0	1	1	1	0	2	0	0	0	0	1	0	1	0	9	78	110	60	25	34	35	13	49	73	51	30	21	47	41	57	24	33	124	69	13	24	37	5	35	36	24	3
BMP8B	1	1	1	0	0	0	0	0	0	0	0	0	1	0	0	1	0	1	0	0	0	337	1234	1441	947	1338	1021	857	360	1925	2641	1162	1006	308	1173	2229	771	853	1495	3235	744	311	508	311	26	168	248	1066	553
BTC	0	0	0	0	0	0	0	0	0	0	0	0	0	0	0	0	0	0	0	0	0	559	428	363	442	490	344	724	229	536	673	314	664	1804	270	558	407	1422	365	1006	423	464	236	465	7	69	126	696	226
MYDGF	0	0	0	0	0	0	0	0	0	0	0	0	0	0	0	0	0	0	0	0	0	5810	4055	3612	3626	4585	3995	3319	1511	5449	4599	4035	9053	1705	1902	4218	4779	2251	4540	3720	3272	2919	4895	5495	3340	2652	4129	3958	10519
CALCA	4060	18988	5838	3968	3164	9291	9526	1590	11946	14290	2839	2114	13507	7095	10607	4831	12358	1184	5309	2208	9941	0	1	2	0	1	0	0	1	2	7	2	20	22	1	0	2	7	0	2	3	18	43	1	0	2	1	0	926
CALCB	1569	1583	1561	1644	1951	966	1803	1172	1377	1789	1958	1581	1910	1511	1770	1610	1674	2324	1508	806	2424	7	2	3	3	4	5	5	4	4	11	3	19	63	1	1	4	40	5	15	0	6	1	0	0	0	1	0	32086
CAT	80	72	65	44	96	83	82	164	93	59	37	37	195	49	63	42	71	143	92	66	77	13186	8950	7776	7063	14228	7560	7539	5154	12681	7816	8040	7015	3491	5317	14436	13286	6337	7741	13809	6779	3205	2536	949	610	812	1643	5881	1623
CCK	1248	3399	1560	1293	2386	1957	1770	2492	1409	2305	1111	1029	2570	2406	1297	1286	2394	1129	1747	1538	1802	34	2	0	0	4	0	10	7	2	8	0	7	115	4	1	3	119	1	90	3	1	1	8	4	1	57	4	24
CD320	0	0	0	0	0	0	0	0	0	0	0	0	0	0	0	0	0	0	0	1	0	3130	2936	2837	2362	3380	2090	2812	962	3592	3269	2693	3643	1350	1382	3159	3633	1835	2495	811	2609	1742	5899	1582	2118	4613	3005	2049	5748
CD70	1055	575	991	879	1674	515	722	1100	439	780	1890	1213	902	896	815	1312	602	1480	962	737	922	26	28	11	33	28	62	60	5	54	35	18	39	26	16	28	32	19	62	20	20	22	40	4549	70	29	28	61	16
ADA2	216	402	323	273	195	356	262	225	327	282	115	75	239	326	172	286	330	400	418	157	308	1552	2229	4448	2013	3988	6806	1372	1964	7296	4571	4987	3588	1023	1691	4953	5811	1646	7079	1657	3416	179	477	328	145	153	507	491	217
CER1	7	1	3	5	8	1	5	9	2	0	32	14	1	2	2	11	2	9	5	2	3	1	2	1	0	0	0	0	0	0	0	0	0	22	1	0	0	1	0	9	0	0	0	0	0	7	0	0	0
CGA	11	2	4	2	26	0	4	5	1	0	2	2	2	4	5	0	4	6	4	1	5	0	0	2	0	0	0	0	0	1	0	0	4	0	0	0	0	0	0	2	0	0	0	1	0	0	1	0	1
CGB3	0	1	0	0	0	1	0	0	0	0	0	0	0	0	0	0	1	0	1	0	0	0	0	0	0	0	0	0	0	0	0	0	0	0	0	0	0	0	0	0	0	0	1	0	0	1	0	0	0
CGB1	0	0	0	0	2	2	0	0	0	0	0	0	0	1	1	0	0	0	0	0	0	0	0	0	0	0	0	0	0	0	0	0	0	0	0	0	0	0	0	0	0	0	0	0	0	0	0	0	0
CGB2	0	1	0	0	0	0	0	0	0	0	0	1	0	0	0	0	0	0	0	0	0	0	1	1	0	1	0	0	0	0	0	0	0	0	0	0	0	0	0	0	1	0	0	0	0	1	0	0	0
CGB5	0	0	2	4	3	1	1	1	2	5	2	1	1	0	1	3	1	3	3	2	6	0	0	0	0	0	0	0	0	0	0	0	0	0	0	0	0	0	0	0	0	0	7	0	0	0	5	0	0
CGB7	0	0	0	0	0	0	0	0	0	0	0	0	0	0	0	0	0	0	0	0	0	0	0	0	1	0	0	0	2	1	0	1	1	1	0	1	0	0	0	0	0	0	2	0	0	0	2	1	1
CGB8	638	531	804	662	1169	759	1085	581	544	982	853	519	1019	833	674	886	457	803	624	575	914	0	0	0	0	0	0	0	0	0	0	0	0	0	0	0	0	0	0	0	0	0	0	0	0	4	1	0	0
CHGA	0	0	0	0	0	1	0	0	0	0	0	0	0	0	0	0	0	0	0	0	0	5717	13452	13457	11423	10036	5795	4215	3320	31094	14150	11411	9108	1396	6489	20020	22126	9580	5814	17328	20428	81	109	634	50	13	298	3	90
CHGB	0	0	0	0	0	0	0	0	0	0	0	0	0	0	0	0	0	0	0	0	0	755	533	582	367	475	247	432	229	787	407	286	640	567	424	772	871	672	252	3604	652	23	54	73	0	51	25	6	13
CLCF1	0	0	0	0	0	0	0	0	0	0	0	0	0	0	0	0	0	0	0	0	0	127	186	139	143	129	161	152	94	269	126	131	374	175	90	143	200	191	108	142	172	37	415	171	55	182	465	592	161
CLEC11A	0	0	0	0	0	0	0	0	0	0	0	0	0	0	0	0	0	0	0	0	0	141	510	317	235	357	225	474	82	468	426	363	311	394	220	402	453	213	439	277	253	146	384	318	303	421	524	293	456
CMTM1	0	0	0	0	0	0	0	0	0	0	0	0	0	0	0	0	0	0	0	0	0	39	67	66	27	28	36	40	5	60	28	59	25	20	30	66	45	13	40	31	34	16	30	17	0	10	45	92	8
CMTM2	12	13	20	32	17	9	21	13	14	17	10	7	19	30	19	14	11	12	24	5	26	48	11	12	4	21	6	8	4	7	13	3	14	2	8	7	22	73	9	24	11	10	5	19	6	3	13	9	16
CMTM3	5170	4647	5141	3745	7815	3930	3457	6395	2831	4560	10711	6464	6387	4592	4238	6926	5381	9404	5290	3303	5422	627	983	797	621	800	795	785	241	1285	680	666	1136	835	394	852	638	824	1113	705	534	290	537	275	47	223	490	613	446
CMTM4	0	0	0	0	0	0	0	0	0	0	0	0	0	0	0	0	0	0	0	0	0	3675	10987	10855	5897	12908	6542	7782	4549	12204	12543	9748	7132	1816	6531	16723	11831	5621	7096	6901	14400	3879	3307	2494	314	638	3437	2933	4969
CMTM5	0	0	0	0	0	0	0	0	0	0	0	0	0	0	0	0	0	0	0	0	0	41	33	20	19	41	8	95	8	38	37	24	41	176	8	21	10	85	56	69	16	0	2	0	0	0	5	2	0
CMTM6	0	0	0	0	0	0	0	0	0	0	0	0	0	0	0	0	0	0	0	0	0	5990	6166	4438	5945	6967	5168	4500	3256	7716	5297	4891	6251	2752	4311	6295	6130	4802	4632	2928	4693	5444	3817	3674	319	542	2434	8700	6654
CMTM7	1	1	3	1	2	0	0	1	1	1	1	3	1	2	0	1	1	4	0	0	1	253	413	336	304	335	783	357	193	787	402	432	659	169	266	437	529	330	742	174	348	408	383	1856	197	135	792	1542	442
CMTM8	0	0	0	0	0	0	0	0	0	0	0	0	0	0	0	0	0	0	0	0	0	273	355	281	428	340	255	248	153	409	411	354	321	70	173	473	376	217	226	370	350	722	330	355	210	245	231	560	667
CNTF	0	0	0	0	0	0	0	0	0	0	0	0	0	0	0	0	0	0	0	0	0	22	27	12	10	27	22	33	10	18	17	17	17	13	16	35	16	19	12	61	29	7	10	5	0	1	7	28	4
CORT	0	0	0	0	0	0	0	0	0	0	0	0	0	0	0	0	0	0	0	0	0	3	9	18	20	13	12	32	2	17	12	12	13	15	10	12	13	18	12	17	22	8	10	4	6	1	8	3	7
CRH	160	95	99	111	248	26	45	355	33	159	174	262	59	99	145	100	112	319	198	89	121	0	0	0	0	0	0	0	0	0	0	0	0	0	0	0	0	0	0	0	0	0	0	0	0	0	0	0	0
CSF1	0	0	0	1	1	0	0	0	0	0	0	0	0	0	1	0	0	0	1	0	2	931	3845	2110	1039	2211	2072	3582	989	2904	2271	2211	2712	2053	1207	3380	2612	1629	3119	1703	1986	841	613	510	164	251	1034	795	459
CSF2	0	0	0	0	0	0	0	0	0	0	1	0	0	0	0	0	0	0	0	0	0	6	2	0	3	2	2	1	0	2	1	1	25	0	0	2	4	2	6	1	2	23	6	104	2	6	30	9	19
CSF3	0	1	0	0	1	2	1	1	0	0	0	0	0	0	0	1	0	0	1	1	1	75	83	4	4	2	4	108	21	9	21	1	183	61	0	0	80	168	1	429	13	61	193	274	36	15	163	0	63
CSH1	289	479	727	414	789	238	327	238	505	443	414	180	402	445	335	561	374	365	355	652	542	0	0	0	0	0	0	0	0	0	0	0	0	0	0	0	0	0	0	0	0	0	0	0	0	0	0	0	0
CSH2	3	5	1	0	8	5	0	8	6	1	7	12	1	8	8	0	7	11	5	1	8	0	0	0	0	0	0	0	0	0	0	0	0	0	0	0	0	0	0	0	0	0	0	0	0	0	0	0	0
CSHL1	2372	2963	3132	2993	3549	2379	3731	2494	2454	4495	2521	1781	3665	3097	2835	2576	2278	2332	2913	2596	3415	0	0	0	0	0	0	0	0	0	0	0	0	0	0	0	0	0	0	0	0	0	0	0	0	0	0	0	0
CSPG5	0	0	0	0	0	0	0	0	0	0	0	0	0	0	0	0	0	0	0	0	0	8	19	17	20	70	8	92	30	54	76	20	17	81	18	33	61	44	43	30	65	23	10	69	2	11	29	191	49
CTF1	1	0	0	1	1	1	0	1	0	0	0	0	0	0	0	0	1	0	0	0	0	78	177	58	44	79	63	142	30	95	158	67	154	555	41	65	68	310	87	227	83	10	20	8	7	23	24	292	31
DKK1	1	1	1	1	0	1	2	1	1	3	0	1	0	1	2	0	1	2	0	0	1	31	6	7	5	12	7	4	5	6	6	12	9	7	7	11	13	12	6	15	18	14	9	12	0	1	4	736	91
EBI3	1	0	0	0	0	0	0	0	1	0	0	0	0	0	1	0	0	0	1	0	0	196	197	158	134	185	220	116	81	383	88	213	423	37	109	170	289	114	318	136	136	40	47	45	61	17	42	9	10
EGF	5432	3958	4077	5659	9687	4372	5264	7819	4775	6663	7082	5660	6511	5593	5562	7389	4017	7007	5742	6301	7203	59	18	55	92	142	122	127	63	154	181	186	101	38	93	318	63	46	79	30	103	18	370	14	14	2	15	232	690
EPGN	0	0	0	0	0	0	0	0	0	0	0	0	0	0	0	0	0	0	0	0	0	0	0	0	0	0	0	0	1	0	0	0	5	0	1	0	2	0	0	0	0	2	1	0	0	0	0	0	0
EPO	0	0	0	0	0	0	0	0	0	1	0	0	1	0	0	0	1	0	0	0	1	1	0	2	0	1	1	1	0	1	0	1	2	2	1	4	1	1	0	2	2	1	1	0	0	0	0	0	1
EREG	0	1	0	0	0	0	0	0	0	0	0	0	0	0	0	0	0	0	0	0	0	231	98	350	169	181	105	141	126	147	513	66	400	102	524	218	366	389	213	467	659	659	4443	6235	43	173	1011	841	412
ESM1	5	14	6	10	29	10	11	9	4	10	14	8	20	6	11	10	8	14	11	25	14	2	2	7	3	15	5	11	4	8	9	11	17	7	5	0	3	11	3	17	1	397	133	42	18	64	61	320	151
FAM3B	0	0	1	0	0	0	0	0	0	1	0	0	1	0	0	0	0	0	0	0	0	6352	154	6	21	1994	2573	44	1192	97	25	336	683	15	2025	54	37	7	437	18149	6	1949	2554	238	107	137	153	235	2107
FAM3C	28	24	38	24	59	25	31	24	19	50	33	19	36	29	28	45	18	30	20	41	36	844	1020	1449	1573	1159	885	1339	612	1622	1358	1134	1617	1085	745	1345	1269	1263	982	7128	1274	990	772	711	41	124	429	1809	1671
FAM3D	992	326	317	512	1715	212	264	1229	107	247	2049	1311	590	340	348	883	505	2588	643	257	542	17878	22196	24932	36270	19861	20098	17296	9067	32677	36224	17616	31532	2101	8915	29634	30601	13269	16463	12238	29267	18040	4694	2211	2134	5718	2729	4599	12802
FGF1	1053	2239	962	907	1323	1922	2263	577	1778	2469	935	634	2889	1658	1621	897	1953	761	865	1186	1789	43	93	35	32	64	16	157	24	45	95	42	94	263	47	50	25	205	62	153	24	26	20	13	1	13	30	36	43
FGF11	788	1395	963	1278	692	1055	1634	441	1473	1909	449	244	1757	1211	1178	717	1245	392	815	280	981	7	20	15	5	13	11	10	6	29	11	28	13	4	13	18	20	7	6	6	18	3	18	1	0	1	3	9	5
FGF12	0	0	0	0	0	0	0	0	0	0	0	0	0	0	0	0	0	0	0	0	0	32	32	12	15	32	5	74	20	30	38	25	41	168	20	13	16	129	18	31	33	13	11	4	0	0	4	9	17
FGF13	8	13	110	0	10	5	3	1	4	8	5	2	11	4	1	10	2	10	8	8	4	93	219	140	130	159	85	375	73	222	320	106	227	1063	121	177	115	580	136	390	174	459	36	10	2	6	15	14	21
FGF14	6	18	66	91	52	18	63	50	55	23	22	16	4	24	24	62	4	21	11	29	34	21	60	16	16	32	10	105	6	37	26	23	18	107	23	33	18	39	26	94	22	6	5	3	0	0	2	2	28
FGF16	3046	3864	2017	2695	3006	2069	2883	1485	4382	4017	3400	1577	4557	4805	2814	2690	4032	2005	3160	2179	3339	0	3	0	3	13	1	2	1	1	0	1	1	7	1	0	0	7	0	0	2	0	0	0	0	0	0	0	0
FGF17	0	0	0	0	0	0	0	0	0	0	0	0	0	0	0	0	0	0	0	0	0	1	4	1	4	2	2	12	2	5	2	6	0	2	0	4	4	2	3	4	6	9	9	2	0	2	3	2	0
FGF18	4391	11066	8797	4971	12567	9844	10508	4423	6300	14448	9203	3229	12522	12187	7712	8639	10349	5622	4951	9225	7651	31	88	9	19	18	13	60	7	29	31	14	29	31	11	21	18	25	21	45	22	121	36	19	28	20	24	74	103
FGF19	0	0	0	0	0	0	0	0	0	0	0	0	0	0	0	0	0	0	0	1	0	0	0	0	0	1	0	0	1	0	0	0	0	2	19	1	0	0	0	639	1	134	3	0	16	7	15	21	12
FGF20	0	0	0	0	0	0	0	0	0	0	0	0	0	0	1	0	0	0	0	0	0	0	0	1	2	0	0	1	1	2	0	1	0	1	1	2	2	0	1	1	1	94	28	1	0	12	1	300	74
FGF21	5709	13214	7261	5935	7167	10037	12710	2937	10474	12426	3099	3897	14694	9987	12173	6044	10442	4137	7005	6491	10988	0	0	0	0	0	0	0	0	0	0	0	0	0	0	0	0	0	0	1	0	0	1	0	0	0	0	1	0
FGF22	5579	7665	5944	5531	6640	9049	9537	4572	5789	9508	6145	4977	9562	7951	7727	6083	5690	8062	4917	5819	8559	1	2	2	0	3	0	2	3	1	7	0	0	2	1	7	2	1	0	2	2	0	2	3	0	2	1	14	0
FGF23	1	2	2	2	3	0	0	0	1	0	0	0	2	2	0	0	3	3	1	2	1	0	0	1	0	0	1	0	0	3	0	0	1	1	0	0	0	0	1	3	0	2	21	0	0	1	0	0	1
FGF3	1	0	9	2	2	1	4	5	3	6	2	0	4	3	0	2	3	8	5	2	4	0	0	0	0	0	0	0	0	0	0	0	0	0	2	0	0	0	0	0	0	23	1	0	0	0	1	7	1
FGF4	11	10	17	10	24	9	16	12	11	10	7	8	15	14	13	16	6	20	13	18	14	2	1	4	0	1	1	4	2	0	1	0	6	0	4	3	3	0	0	0	1	7	2	1	0	0	2	0	1
FGF5	0	3	2	0	3	1	2	1	1	2	1	0	0	0	0	6	2	0	0	5	1	130	7	0	0	10	0	1	6	1	7	0	36	47	1	1	2	13	1	63	1	0	0	3	0	1	7	2	5
FGF6	34	31	38	26	30	21	27	38	15	31	38	31	29	22	27	30	25	30	32	16	21	0	0	0	0	0	0	0	0	0	0	0	0	7	0	0	0	0	0	0	1	0	0	0	0	0	0	0	0
FGF7	3215	4978	4740	4132	5395	4514	5368	3503	3276	6254	3776	2690	6016	5169	4663	4116	4150	3823	4131	3722	5423	787	1474	422	211	293	125	445	229	437	441	176	878	1899	353	243	274	1059	175	219	295	90	168	46	4	25	90	23	95
FGF8	1	1	1	0	1	0	0	4	0	0	3	1	2	0	0	0	0	2	1	1	0	0	1	1	1	0	0	0	0	0	2	0	0	0	0	1	1	3	1	0	3	1	8	0	0	1	4	2	3
FGF9	0	0	0	0	0	0	0	0	0	0	0	0	0	0	0	0	0	0	0	0	0	20	128	234	107	107	60	64	49	118	111	104	133	27	56	206	87	57	64	541	285	7	3	9	1	2	9	52	4
VEGFD	16	11	12	7	8	6	5	2	10	5	5	2	11	4	5	7	7	19	9	7	9	98	326	48	23	225	26	364	61	205	197	82	166	368	162	124	30	585	42	202	84	2	1	0	0	0	3	9	0
FIGNL2	77	117	124	107	81	53	101	130	95	134	79	69	107	99	103	97	81	119	152	62	141	0	13	6	6	4	3	5	0	16	9	10	8	6	2	6	10	2	8	4	1	1	4	1	1	0	6	1	2
FLT3LG	0	1	1	1	0	0	0	0	1	0	0	0	0	0	0	0	0	0	0	0	0	85	86	64	86	74	99	121	18	147	95	101	92	147	29	97	69	100	147	108	69	14	38	10	3	19	17	28	22
FSHB	0	0	0	0	0	0	0	0	0	0	0	0	0	0	0	0	0	0	0	0	0	0	0	0	0	0	0	0	0	0	0	0	0	0	0	0	0	0	0	0	0	0	0	0	0	0	0	0	0
GAL	0	0	0	0	0	0	0	0	0	0	0	0	0	0	0	1	0	0	0	0	0	206	211	68	170	147	71	1565	46	233	184	113	518	571	198	173	79	327	277	245	94	264	153	1533	58	61	87	3	776
GALP	1	0	0	0	4	0	0	0	0	1	1	0	0	0	0	0	0	1	0	2	0	0	0	0	0	0	0	0	0	0	0	0	0	0	0	1	0	0	0	0	0	1	0	0	0	0	0	0	0
GAST	0	0	0	0	0	0	0	0	0	0	0	0	0	0	0	0	0	0	0	0	0	0	0	0	0	0	0	0	0	0	0	1	0	2	0	1	1	2	0	0	0	0	1	0	0	2	13	1	12
GCG	0	0	0	0	0	0	0	0	0	0	0	0	0	0	0	0	0	0	0	0	1	629	1402	2278	2184	444	639	818	327	2198	1389	1065	1031	90	398	1316	1611	1070	415	9223	2390	0	4	108	1	0	23	4	3
GDF1	29	27	17	41	38	11	44	13	15	14	13	16	13	11	19	12	21	19	16	24	18	0	0	0	0	0	0	0	0	0	0	0	0	0	0	0	0	0	0	0	0	0	0	0	0	0	0	0	0
GDF10	0	0	1	0	0	1	1	1	0	0	0	0	0	0	0	0	0	0	0	0	0	5	58	21	38	35	8	55	4	43	48	22	33	127	14	26	13	53	34	26	11	0	0	0	0	1	3	8	1
GDF11	1158	1203	1280	1367	2018	1363	1775	2450	1081	1696	1333	1458	1715	1359	1300	1140	1198	1504	1962	996	1467	221	488	286	154	258	293	438	143	484	348	347	381	1154	225	369	303	433	312	319	260	165	612	114	48	264	277	307	424
GDF2	22	18	17	11	22	5	7	15	12	16	32	30	15	8	19	8	8	16	24	27	34	0	0	0	0	0	0	0	0	0	0	0	1	0	0	0	0	0	0	0	0	0	0	0	0	0	0	0	0
GDF3	0	0	0	0	0	0	0	0	0	0	0	0	0	0	0	0	0	0	0	0	0	4	3	1	1	2	0	0	1	1	0	1	2	0	2	1	1	4	1	4	0	1	1	2	0	0	4	0	0
GDF5	1764	2013	2626	2493	2829	2353	2846	3326	2237	3469	1767	1507	3062	3124	2173	2183	1683	2070	3374	1855	2873	35	10	0	2	12	0	10	6	0	7	1	33	173	2	1	0	17	0	7	4	1	0	0	0	13	1	7	0
GDF6	2	0	1	0	1	0	0	1	0	2	0	0	0	0	0	0	0	0	0	0	0	8	61	12	13	17	7	43	5	28	36	28	36	82	30	30	16	68	14	53	42	8	3	9	0	2	13	15	8
GDF7	87	77	20	90	111	17	64	47	14	70	127	114	51	17	89	100	17	451	29	51	97	14	65	68	14	101	59	134	44	113	79	72	41	121	96	52	62	66	43	28	34	5	16	3	1	7	5	3	1
GDF9	739	319	371	328	348	177	219	759	159	369	791	558	345	377	325	520	548	469	430	242	377	7	22	18	7	23	11	24	10	14	14	11	13	18	12	29	21	12	15	16	24	10	5	2	0	7	3	17	6
GDNF	0	1	0	0	0	4	0	4	0	0	0	0	2	1	0	2	1	0	0	0	1	47	148	126	40	124	84	230	105	91	159	109	123	451	92	168	146	204	142	86	133	23	32	6	0	7	14	1	19
GH1	0	0	0	0	0	0	0	0	0	0	0	0	0	0	0	0	0	0	0	0	0	1	4	2	1	5	6	1	0	1	3	7	3	1	1	3	0	0	2	3	2	0	0	0	0	0	0	0	0
GH2	1034	688	1134	831	1515	598	765	860	559	830	1338	801	959	1071	712	1122	707	1584	824	745	814	0	0	0	0	0	0	0	0	0	0	0	0	0	0	0	0	0	0	0	0	0	0	0	0	0	0	0	0
GHRH	9	13	16	15	18	6	14	2	7	8	12	2	11	15	4	7	9	16	4	7	21	0	1	4	2	1	0	2	0	2	0	1	0	0	1	2	4	1	2	10	2	0	1	2	2	0	0	0	0
GHRL	0	0	1	0	0	1	0	0	0	1	0	0	0	2	0	1	0	0	0	0	0	13	20	31	16	16	28	35	15	39	11	26	12	8	21	29	31	23	31	61	24	8	8	6	0	3	14	21	1
GIP	7	2	6	0	9	1	2	5	2	7	9	1	6	5	5	3	0	6	7	7	2	0	0	0	0	0	0	0	0	0	0	0	0	0	0	0	0	0	0	1	0	0	0	0	0	0	0	0	0
GKN1	2	13	5	7	11	5	7	3	5	8	10	3	10	10	19	12	2	5	12	5	8	0	0	0	0	0	0	0	0	0	0	0	0	0	0	0	0	0	0	0	0	0	0	0	0	0	0	0	0
GMFB	1	7	5	1	4	5	1	1	3	1	1	0	3	3	2	3	1	6	1	1	2	6890	5225	4488	4528	6622	4355	4548	3606	6986	5066	4662	5796	1600	5280	7712	5179	4187	4063	4246	4163	3253	2037	1651	10	122	1243	3661	2986
GMFG	10	7	33	8	21	7	18	12	2	14	7	8	7	6	11	6	9	9	7	7	13	1249	585	718	652	730	1445	576	290	1794	704	924	1117	247	382	963	959	785	1213	615	521	246	305	157	135	101	225	130	280
GNRH1	0	0	0	0	0	0	0	0	0	0	0	0	0	0	0	0	0	0	0	0	0	16	52	77	40	37	43	53	34	44	27	47	36	29	50	59	42	29	31	34	44	18	29	6	1	0	8	41	15
GNRH2	1009	1082	1850	1115	1624	912	1596	751	960	1605	1214	707	1883	1604	1330	1521	914	1254	904	798	1656	3	3	2	1	1	1	3	0	0	4	1	0	0	1	3	4	4	1	3	4	1	4	0	0	2	2	5	2
GPHA2	1	0	0	1	0	1	0	1	1	1	0	0	0	0	0	0	0	1	0	2	0	1	1	1	0	1	1	0	0	3	0	0	0	4	1	0	3	1	0	0	1	0	0	1	0	0	0	0	1
GPHB5	0	0	0	0	0	0	0	0	0	0	0	0	0	0	0	0	0	0	0	0	0	0	0	0	0	0	0	0	0	1	0	0	0	0	0	0	0	0	0	0	0	0	0	0	0	0	0	0	0
GPI	812	1497	1290	1216	1429	1175	1702	1353	1193	1900	902	825	1612	1211	1269	971	984	976	1342	935	1408	10479	21907	11246	9559	23039	13971	21684	6878	23316	19386	15344	23246	14028	10534	23625	19696	12458	16483	21912	17401	12905	19868	15652	3295	13683	12335	31292	30878
GREM1	0	2	0	1	4	4	4	2	8	2	1	0	3	6	2	2	3	2	3	2	3	1663	18852	1552	1654	2559	1107	6439	1093	3546	2337	1698	7390	3085	1761	2563	1623	3367	3042	2424	2913	1703	2175	1405	79	418	3947	2600	4094
GREM2	0	0	0	0	0	0	0	0	0	0	0	0	1	0	0	1	0	0	0	0	0	1202	3093	1518	1431	1995	826	2962	916	3340	2743	1712	1764	6358	960	3705	1335	3947	1818	3009	3228	32	54	6	1	42	77	70	11
GRP	271	245	282	308	352	193	340	423	240	323	470	311	402	295	298	377	214	391	434	196	337	6	8	1	0	2	0	31	3	1	10	0	18	100	11	0	0	34	0	34	1	1	75	1	5	42	27	297	3
GUCA2A	102	44	161	124	174	66	116	47	103	110	45	34	95	92	48	252	121	144	55	91	312	27852	19138	31467	26696	30087	31258	15863	8544	32692	45312	18728	32905	2060	32284	37494	32800	23308	25693	94893	23445	285	518	990	163	46	1464	39	299
HBEGF	0	0	0	0	0	0	0	0	0	0	0	0	0	0	0	0	0	0	0	0	0	1263	797	673	247	1000	692	2879	1615	1430	3793	454	5773	266	1428	531	2313	3448	1502	1599	9187	775	3061	241	233	1572	1113	1355	720
HDGF	3636	3768	11538	9785	5986	3375	8198	3416	4863	7427	3225	2613	5980	8298	6521	6795	2919	4187	8691	4183	9573	12076	13863	10223	9956	18389	13655	16187	7879	21084	14951	14674	18344	7212	12061	18031	15199	11278	13897	25883	12453	15646	24050	9361	2232	3991	8326	16653	20264
IAPP	489	450	483	504	880	646	593	1258	385	557	706	394	705	674	364	587	334	884	604	434	578	1	0	0	0	0	0	0	0	0	0	0	0	0	0	0	0	0	0	0	0	0	0	0	0	0	0	1	0
IFNE	52	53	89	66	82	32	60	30	49	66	32	30	86	66	42	55	52	84	50	39	65	0	0	0	0	0	0	0	0	1	0	0	0	0	0	0	0	0	0	10	0	0	2	4	0	0	4	9	0
IFNK	18	22	28	28	28	13	21	12	21	35	13	9	15	28	15	22	12	16	18	20	26	0	1	0	0	0	1	1	1	0	0	0	0	0	1	0	0	0	0	1	1	0	0	0	0	0	0	0	0
IFNW1	0	0	1	0	2	0	0	0	0	0	0	1	0	0	0	0	0	2	0	0	0	1	0	1	0	0	0	1	0	0	0	0	0	0	1	0	1	0	0	2	0	0	0	0	0	0	0	0	0
IGF1	0	0	0	0	0	0	0	0	0	0	0	0	0	0	0	0	0	0	0	0	0	232	317	140	83	116	138	88	31	126	109	117	118	70	113	214	110	71	123	46	104	12	8	3	15	3	30	3	6
IGF2	0	0	0	0	0	0	0	0	0	0	0	0	0	0	0	0	0	0	0	0	0	470	2032	612	701	1443	590	2574	350	2121	2185	1183	1227	6525	1070	1162	622	1795	818	2590	1554	288	801	295	1746	807	1126	627	839
IL11	0	2	0	0	0	1	1	0	0	0	0	0	1	0	1	0	0	0	0	0	0	8	8	9	7	7	4	8	2	4	3	6	66	11	8	9	11	6	6	8	11	29	321	553	20	15	100	42	446
IL12A	0	0	0	0	1	0	0	0	1	0	1	0	1	0	0	0	0	0	0	0	2	36	28	17	28	34	37	20	24	32	26	26	47	19	12	19	22	19	35	25	18	23	69	21	26	3	10	7	0
IL16	0	0	0	0	1	0	1	0	0	0	0	0	0	0	0	1	0	0	0	0	1	740	575	1709	940	984	2563	1199	472	4122	1081	2403	1524	440	735	1666	2046	1324	2171	731	1142	116	181	77	119	61	192	137	38
IL17B	3479	5715	5251	3310	6356	5955	5729	3147	4470	7143	3740	2339	6879	6607	4319	4509	4068	4269	4160	4647	4901	20	9	10	8	10	8	39	7	17	23	10	18	117	12	14	11	31	17	48	14	4	9	2	0	11	8	6	1
IL17C	0	0	0	0	0	0	0	0	0	0	0	0	0	0	0	0	0	0	0	0	0	1	2	2	2	0	7	2	0	9	3	4	11	0	1	1	2	0	3	0	10	2	8	45	12	1	18	1	29
IL17D	1	7	5	2	2	5	5	1	2	5	1	1	4	5	4	2	3	6	3	4	0	74	76	41	35	95	28	142	21	88	94	49	44	101	54	78	51	101	47	93	41	126	24	41	36	31	18	48	30
IL17F	0	2	2	1	3	0	1	3	0	4	3	2	9	5	1	4	1	1	1	6	3	1	0	0	0	2	4	1	3	2	3	1	13	0	0	0	0	0	6	0	1	31	4	2	0	0	2	1	0
IL19	802	897	1542	678	1930	2757	2013	895	779	1380	495	643	1282	2093	624	1167	356	1307	1227	819	1317	0	0	0	0	0	1	1	0	3	0	0	27	1	0	2	5	2	0	0	2	0	1	1	0	0	1	0	1
IL1F10	0	0	0	0	0	0	0	0	0	0	0	0	0	0	1	0	0	0	0	0	0	0	0	0	0	0	0	0	0	0	0	1	0	0	0	0	0	0	0	0	0	0	1	0	0	0	1	1	0
IL36RN	0	0	0	0	0	0	0	0	0	0	0	0	0	0	0	3	0	0	0	3	0	0	0	1	0	0	2	0	0	0	0	0	3	12	1	0	0	0	1	1	0	0	1	10	0	1	12	35	38
IL36A	0	0	0	0	0	0	0	0	0	0	0	0	0	0	0	0	0	0	0	0	0	2	0	1	0	0	0	0	0	1	0	0	0	0	1	0	0	0	0	0	0	0	0	0	0	0	0	2	0
IL37	1	0	0	0	0	0	0	0	0	0	0	0	0	1	0	0	0	1	0	1	0	4	10	32	12	2	9	9	2	23	18	6	0	3	4	7	19	1	1	1	35	4	11	0	0	86	3	11	34
IL36B	0	0	0	0	0	0	0	0	0	0	0	0	0	0	0	0	0	0	0	1	0	0	0	1	0	0	0	0	0	0	0	0	1	30	0	1	0	0	0	0	0	0	0	7	0	0	20	19	12
IL36G	0	2	1	3	0	0	0	0	0	0	0	2	0	1	1	1	0	0	1	0	0	1	2	8	3	1	3	0	1	4	0	1	2	1	3	1	2	1	1	1	4	1	18	1	0	30	2	5	3
IL1RN	0	0	0	0	0	0	1	0	0	0	1	0	0	0	2	4	0	0	0	1	0	95	110	39	110	685	204	278	135	114	104	136	739	24	89	71	261	122	250	570	299	188	95	1059	57	85	2294	3556	3039
IL20	0	0	0	0	0	0	0	0	0	0	0	0	0	0	0	0	0	0	0	0	0	0	0	0	0	0	0	0	0	0	0	1	2	0	1	1	0	0	1	1	2	0	2	1	3	0	1	0	0
IL21	1	13	11	2	26	11	22	15	20	20	3	5	19	9	10	5	16	14	9	2	23	0	0	0	1	0	3	0	1	2	0	3	2	0	1	2	1	3	3	0	2	0	0	1	0	0	1	0	0
IL23A	0	0	0	0	0	0	0	0	0	0	0	0	0	0	0	0	0	0	0	0	0	9	26	27	12	17	31	12	14	26	16	22	39	6	21	20	40	17	17	22	41	71	70	25	3	54	33	125	57
IL24	4448	5018	7243	5704	8603	6222	8715	6112	5820	8175	4160	4406	7193	6791	5987	5573	3810	5039	7370	5835	8766	29	32	66	55	55	178	94	25	544	42	200	96	11	97	99	148	245	92	48	81	34	221	156	2	17	41	52	23
IL25	0	0	0	0	0	0	0	0	0	0	0	0	0	0	0	0	0	0	0	0	0	1	0	0	0	0	0	1	0	1	0	1	0	0	0	2	0	0	2	1	1	0	1	1	0	0	0	0	0
IL26	616	515	731	866	883	586	850	1060	636	854	688	696	806	787	679	671	481	713	963	531	948	3	1	1	7	2	16	4	5	9	2	7	7	4	2	2	2	1	22	5	1	26	2	2	2	0	0	1	0
IFNL3	0	0	0	0	1	0	0	0	0	0	0	0	0	0	0	0	0	0	0	3	0	0	0	0	0	0	1	0	0	0	0	0	0	0	0	0	0	0	0	0	0	0	0	0	0	0	0	0	0
IL3	3	3	3	1	1	2	1	5	3	8	1	3	7	4	1	3	5	2	2	2	3	0	0	0	0	0	0	0	0	1	0	0	0	0	0	0	0	0	1	0	0	0	0	0	0	0	0	0	0
IL31	0	0	0	0	0	0	0	0	0	0	0	0	0	0	0	0	0	0	0	0	0	0	1	0	0	0	0	0	0	0	0	1	0	0	0	0	0	0	0	0	0	0	0	0	0	0	0	0	0
IL32	36	22	32	34	23	34	49	57	34	28	35	33	34	34	35	29	17	42	64	26	30	7443	4081	5655	4823	9327	9886	5584	3508	10022	11267	5982	5159	1587	10155	11153	8787	5008	17569	46841	5581	3858	6503	12760	2691	2795	5938	2335	9895
IL33	8713	20015	13532	12268	15924	22816	18579	9289	16487	19635	10745	5658	28994	27283	14401	15809	15739	7265	10032	16265	16268	1041	2060	476	660	785	366	952	295	1230	732	477	1290	2832	403	532	383	1712	477	747	527	619	3312	3720	96	896	2148	74	5843
IL34	0	0	0	1	0	2	1	0	0	1	0	0	2	0	0	0	0	0	0	1	1	102	240	252	212	250	234	358	81	410	279	272	335	258	165	336	287	226	277	246	171	85	135	21	79	129	46	36	27
IL5	16	4	9	13	13	3	3	18	8	3	14	12	6	11	7	16	5	12	7	7	7	1	4	0	1	1	1	6	2	1	5	1	1	4	5	2	1	1	4	4	0	2	3	3	0	0	4	4	1
IL6ST	8392	18270	11561	8683	11274	15515	14137	10679	16625	18107	6751	5994	18079	15014	13209	8676	17701	7927	14521	9087	12564	4250	9530	5654	3238	6185	4319	7369	3471	8882	5562	5193	7133	8824	4942	7722	6445	7535	5277	5122	4124	1692	1351	1220	54	141	1362	2682	1627
IL7	3	7	9	7	11	9	15	15	8	23	1	6	14	25	9	3	11	12	6	3	15	594	493	322	325	479	446	359	252	584	442	372	750	91	274	620	526	315	569	681	340	502	186	237	47	85	167	496	95
IL9	2773	4482	3691	4190	4027	3748	5052	3803	4330	5522	2090	2161	5242	4916	3748	2959	4021	2765	4924	2603	4870	0	0	1	1	0	0	0	0	0	0	0	0	0	0	0	1	0	1	0	1	2	0	0	0	0	0	1	0
INHA	0	0	0	0	0	0	0	0	0	0	0	0	0	0	0	0	0	0	0	0	0	0	5	1	0	0	1	1	0	2	5	0	3	7	1	3	0	0	0	1	2	0	0	0	0	1	4	1	0
INHBA	1	0	0	0	0	1	0	0	0	1	1	0	0	0	0	0	0	2	0	0	0	12	134	11	27	46	18	74	23	44	19	34	180	56	30	30	39	24	27	29	33	610	880	719	38	226	626	2253	1845
INHBB	0	0	1	0	0	0	0	0	0	0	0	0	0	0	0	0	0	0	0	1	1	45	367	66	15	52	33	141	56	314	227	39	204	118	40	96	164	111	113	95	91	1367	93	37	25	115	106	146	396
INHBC	0	0	0	0	0	0	0	0	0	0	0	0	0	0	0	0	0	0	0	0	0	2	3	2	0	0	0	0	0	1	1	2	2	1	1	1	3	3	1	4	3	0	3	0	0	1	0	5	0
INHBE	12	28	10	41	21	18	54	19	39	25	13	16	26	10	21	14	18	61	27	8	39	11	20	10	14	14	16	15	6	14	13	20	9	9	12	15	22	8	15	6	22	20	47	3	4	8	9	25	23
INS	2	4	2	11	8	2	3	2	4	4	1	2	6	3	2	4	2	3	5	8	5	0	0	0	0	0	0	0	0	0	0	1	0	0	0	0	0	0	0	0	0	0	0	0	0	0	0	0	0
INS-IGF2	0	1	0	0	0	0	0	0	1	1	0	0	0	0	0	1	0	0	0	0	1	0	2	0	0	0	0	0	0	0	0	0	0	0	0	0	0	0	0	0	0	0	0	0	0	0	0	0	0
INSL3	0	0	0	0	0	0	0	0	0	0	0	0	0	0	0	0	0	0	0	0	0	5	26	67	12	19	15	26	5	48	33	27	33	3	27	24	50	10	24	40	81	12	13	3	5	23	9	11	11
INSL4	0	1	0	0	2	0	0	0	0	0	0	0	0	1	0	0	0	0	0	0	0	0	2	0	0	0	3	0	0	0	0	0	2	0	0	0	0	0	0	0	0	0	0	2	0	0	1	0	1
INSL5	0	0	0	0	2	0	0	0	0	1	0	0	1	2	0	2	0	0	0	0	0	27	10	869	764	39	49	96	4	132	456	37	118	4	180	156	270	106	60	0	656	0	3	0	0	0	0	0	1
INSL6	24	50	99	37	29	50	60	38	39	49	34	18	47	46	35	75	30	42	47	38	47	1	0	1	1	6	1	5	2	0	1	1	2	1	2	3	1	1	1	2	0	2	2	0	0	0	0	0	1
JAG1	0	0	0	0	0	0	0	0	0	0	0	0	0	0	0	0	0	0	0	0	0	2823	7259	7308	2797	6641	3472	7018	3265	8179	5893	5061	7851	3298	6660	6694	8577	4341	5458	3799	8232	2077	5716	4653	438	854	2865	6757	4155
JAG2	856	585	923	645	1518	682	879	1909	321	1119	1086	849	1117	491	630	1593	531	1880	376	1224	1029	203	1108	553	241	818	379	1040	166	943	815	756	971	531	339	568	422	484	599	1490	809	961	868	680	577	367	956	2256	1360
KITLG	548	841	818	655	893	666	931	622	773	1030	524	550	893	821	731	628	713	711	740	619	1003	2745	3876	2167	1659	3187	1526	2800	1732	2852	2688	2490	2643	5717	1580	3848	3151	3497	2122	1194	1780	3431	383	1998	5	63	1091	4273	1381
KL	316	404	241	294	316	144	233	205	179	444	541	286	385	237	393	415	221	670	235	315	439	71	246	149	56	115	81	169	62	188	164	104	168	268	82	151	201	343	79	387	106	62	8	17	0	1	20	5	4
LACRT	0	0	0	0	0	0	0	0	0	0	0	0	0	0	0	0	0	0	0	0	0	0	0	0	0	0	0	0	0	0	0	0	0	0	0	0	0	0	0	0	0	0	0	0	0	0	0	0	0
LEFTY1	0	0	0	0	0	0	0	0	0	0	0	0	0	0	0	0	0	0	0	0	0	3268	7082	4691	6761	3714	2381	4856	1983	3434	7081	3633	2140	243	1582	2937	3364	1081	2144	47	5166	737	48	429	349	7554	1562	386	3
LEFTY2	37	9	49	5	143	18	22	4	4	16	26	12	34	18	9	46	30	17	3	82	247	33	21	36	15	77	17	19	20	53	48	35	41	200	19	40	37	32	21	18	20	9	2	0	29	39	24	5	4
LHB	0	0	1	0	1	0	0	0	0	1	0	1	0	0	2	0	0	1	0	0	0	2	2	0	1	0	2	1	1	2	0	2	1	0	0	0	1	0	3	10	2	0	5	1	1	0	4	4	4
LIF	60	116	67	46	69	53	113	69	98	78	72	111	90	63	109	53	98	56	57	54	74	168	740	811	424	473	445	566	200	617	483	574	755	71	230	664	665	312	410	563	910	368	1470	2791	185	412	1495	1649	642
LRSAM1	1561	2756	2595	2380	1594	2450	2650	1990	1800	2991	1255	1127	2705	3132	2181	2213	1985	1949	1941	1566	2812	390	1184	866	576	994	921	1475	398	1330	1270	1122	1110	1959	658	1038	1212	1066	975	1366	1007	864	1459	405	236	904	469	1077	1427
LTB	730	767	869	577	1569	680	1109	500	607	1043	996	508	1035	856	691	1331	572	950	449	1507	938	190	236	275	478	429	1557	719	187	3855	279	1298	1017	85	334	630	991	742	699	391	638	103	243	108	221	138	147	87	298
LTBP2	1927	3158	2548	2443	2494	2373	2806	1838	3286	3797	1664	1361	3742	3958	2427	2892	1921	1478	3511	2634	3424	309	1796	783	381	2029	1394	2287	579	2578	1173	1967	1113	1871	820	1958	1816	1068	1621	1031	686	816	1255	332	309	758	781	1493	691
LTBP3	384	893	445	334	361	1869	760	1560	601	736	232	205	1432	416	383	431	739	878	749	441	345	958	4563	2547	1236	3454	1776	5631	810	4175	4531	3137	3120	7981	1866	3403	2937	4244	3217	3392	2477	737	1655	824	1036	2617	2490	1414	660
LTBP4	0	0	0	0	0	0	0	0	0	0	0	0	0	0	0	0	0	0	0	0	0	3948	14245	21107	8932	17774	7693	21791	3774	20651	26400	17402	12475	21845	10570	20041	15106	13880	17487	16984	20230	1450	2752	3131	2129	4394	8693	7174	4305
MDK	375	407	372	299	551	452	188	662	221	343	257	291	315	174	212	286	166	689	233	248	299	1326	4402	2962	4196	2685	8630	3806	1536	5969	8990	3423	6187	1675	2630	3072	4352	2881	10713	12917	2747	4848	5231	2505	1999	2143	2969	7817	3441
MIA	0	0	0	0	0	0	0	0	0	0	0	0	0	0	0	0	0	0	0	0	0	6	8	19	25	4	16	30	3	12	9	25	22	45	10	12	17	42	22	21	9	0	0	1	227	2	10	427	0
MLN	0	0	1	0	0	2	1	0	1	1	0	0	0	0	0	2	0	0	0	3	0	3	0	1	0	2	1	2	0	3	0	3	2	1	1	0	1	0	0	20	1	1	0	0	0	0	0	0	2
MSTN	1	1	0	2	1	1	0	0	0	1	1	0	0	1	0	1	1	0	0	0	1	22	8	9	29	37	8	9	4	13	9	11	12	100	6	19	15	72	15	16	21	10	1	3	0	2	2	3	0
NAMPT	1	1	0	0	0	0	0	0	0	0	1	0	0	0	0	0	0	0	0	0	0	6561	6719	3308	2297	5106	3802	4693	3556	5428	3487	3182	10024	1207	3836	5580	4426	3757	3925	4242	3694	6251	3376	2371	125	302	1829	3487	4272
NDP	0	0	0	0	0	0	0	0	0	0	0	0	0	0	0	0	0	0	0	0	0	7	3	2	11	4	5	11	4	18	1	12	22	27	8	10	6	16	14	1	9	21	16	3	0	3	8	182	42
NENF	0	0	0	0	0	0	0	0	0	0	0	0	0	0	0	0	0	0	0	0	0	2496	1518	1344	2054	2002	1535	2153	780	2706	2319	1542	1889	1679	863	2124	2009	1513	1831	1409	1465	1851	1609	1764	859	2524	1375	2562	4824
NGF	331	567	375	514	214	319	689	370	310	642	711	491	653	513	552	799	270	850	256	248	681	16	47	30	13	28	8	44	6	23	23	14	23	57	18	16	10	42	19	39	18	5	4	0	0	3	6	9	10
NMB	0	0	0	0	0	0	0	0	0	1	0	0	0	1	0	0	0	0	0	0	0	91	92	64	94	102	69	120	29	120	94	97	199	100	49	99	80	109	98	69	73	154	280	506	48	71	420	366	311
NODAL	0	0	0	0	0	0	0	0	0	0	0	0	0	0	0	0	0	0	0	0	0	2	4	5	0	3	1	11	3	3	7	1	1	13	6	6	3	3	7	45	6	10	78	1	0	15	2	3	0
NPFF	4	2	11	7	24	5	2	15	6	2	13	7	7	5	3	20	2	45	3	10	8	0	0	0	0	0	0	0	0	0	0	0	0	0	0	0	0	0	0	0	0	0	0	0	0	0	0	0	0
NPPA	2	0	1	1	4	0	1	2	1	2	1	1	1	1	2	1	1	1	2	2	0	1	8	7	1	4	3	15	0	4	2	3	3	0	3	3	2	3	5	8	5	1	0	2	0	0	2	5	2
NPPB	3	2	2	8	5	0	4	1	4	6	2	1	4	8	3	7	4	3	4	17	3	0	1	0	0	0	0	0	0	0	0	1	0	0	0	1	0	0	0	0	0	0	0	0	0	0	0	0	3
NPPC	1141	2038	1178	1069	837	1349	1586	682	1898	2296	841	756	2416	1472	1698	815	2077	1143	1307	870	1897	15	7	5	5	0	24	21	6	68	15	17	66	2	10	8	33	18	7	11	24	2	3	0	1	1	2	1	11
NPY	0	0	0	0	0	1	0	0	0	0	0	0	0	0	0	0	0	0	0	0	0	71	6	145	53	67	67	57	25	31	47	12	46	73	35	95	18	66	58	199	29	1	0	1	0	3	2	1	0
NRG1	1	0	0	0	1	0	0	0	0	0	0	0	0	0	0	0	0	0	0	0	0	184	282	479	184	402	217	235	244	285	302	364	512	121	457	597	615	201	278	125	252	72	67	64	34	10	37	5	11
NRG2	1	8	1	0	1	0	1	1	1	0	0	1	3	0	0	0	0	0	1	1	0	9	37	24	11	37	33	115	21	54	64	36	53	312	30	41	32	106	39	39	41	3	1	4	0	9	3	1	0
NRG3	1	84	40	39	54	37	3	58	12	46	14	11	132	4	34	14	33	38	17	15	3	5	14	16	2	12	2	12	2	21	14	5	14	48	12	10	6	24	14	16	6	1	1	0	0	1	0	1	0
NRG4	0	2	0	0	3	1	0	1	3	3	3	0	6	0	2	0	1	1	0	4	4	118	57	87	17	223	49	86	66	116	54	36	47	19	99	101	42	42	52	16	64	3	10	6	0	4	7	80	7
NRTN	0	0	0	0	0	0	0	0	0	0	0	0	0	0	0	0	0	0	0	0	0	41	111	65	28	91	56	98	45	110	108	86	83	254	59	119	81	84	59	143	58	14	13	35	36	30	78	100	41
NTF3	0	0	0	0	0	0	0	0	0	0	0	0	0	0	0	0	0	0	0	0	0	52	63	60	16	31	19	59	24	42	35	36	55	58	25	34	38	39	54	74	36	10	18	2	3	11	8	7	43
NTF4	104	46	106	118	141	48	124	285	89	74	138	68	80	70	63	98	49	135	128	76	68	0	0	1	0	2	0	0	0	2	2	2	0	0	1	2	0	1	0	0	0	0	0	0	0	0	4	13	2
NTS	1493	1700	3446	2538	3613	2456	3084	2214	1440	3052	1760	989	3072	2794	2314	2693	1374	2882	1924	2029	2512	144	13	10	10	150	100	178	202	144	31	32	25	41	199	101	124	37	21	23391	9	0	0	14	0	0	3	0	2
NUDT6	0	0	0	0	0	0	0	0	0	1	0	0	0	0	0	0	0	0	0	0	0	254	226	234	183	235	171	209	74	176	195	211	126	91	133	244	219	95	141	98	147	125	89	99	26	67	170	202	74
OGN	58	61	90	58	142	13	42	23	75	43	32	16	42	68	38	93	48	62	36	82	82	1079	1860	747	942	1270	450	3010	417	2469	1355	1026	1701	5578	1015	1303	457	4411	803	1961	945	67	3	1	0	4	36	6	2
OSGIN1	5008	7306	6097	5168	8073	6490	7176	9044	8330	9131	4373	4244	8822	7057	6171	5074	7428	4933	8610	5117	6441	467	301	495	389	779	298	497	207	715	704	568	1045	270	1043	929	1278	246	698	2363	771	159	391	263	75	42	181	791	543
OSM	0	0	0	0	0	0	0	0	0	0	0	0	0	0	0	0	0	0	0	0	0	48	35	11	23	471	19	14	14	63	15	18	261	8	5	18	70	80	30	38	105	54	47	162	16	24	212	28	87
OSTN	0	1	0	0	0	1	1	1	2	2	1	0	2	0	0	2	0	0	0	3	1	5	0	0	0	1	2	2	3	3	1	1	0	4	0	2	2	5	0	0	0	0	0	0	0	0	1	0	0
OXT	0	0	0	0	0	0	0	0	0	0	0	0	0	0	0	0	0	0	0	0	0	0	6	0	1	0	1	0	0	4	4	5	0	2	0	3	2	0	2	4	0	1	1	0	0	3	2	0	0
ENDOU	0	0	0	0	0	0	0	0	0	0	0	0	0	0	0	0	0	0	0	0	0	5	16	11	4	5	2	15	1	5	12	4	16	22	4	8	6	9	4	20	7	2	0	3	0	1	1	6	2
PDGFA	11	4	27	14	14	12	18	5	10	12	5	6	5	9	9	26	2	15	10	7	22	1096	1464	1830	1685	1898	1477	1380	878	2045	2474	1398	1473	1570	1803	3057	2239	1211	2366	3657	2590	609	760	473	383	560	747	1270	1489
PDGFB	0	0	0	0	0	0	0	0	0	0	0	0	0	0	0	0	0	0	0	0	0	183	551	496	158	447	261	1012	147	502	567	406	689	1074	248	511	352	495	819	467	345	305	707	214	117	278	463	240	516
PDGFC	170	84	101	102	205	45	77	377	45	70	355	263	143	74	110	147	102	261	231	50	129	443	468	467	272	773	395	500	321	551	579	431	820	1635	449	622	437	1054	504	851	263	181	229	64	20	65	201	528	171
PDGFD	16	35	16	7	15	30	33	13	18	50	17	14	34	27	26	6	62	8	8	13	26	628	895	1052	928	1130	721	653	399	1225	746	1179	478	393	389	1323	1054	816	795	459	902	224	57	25	1	23	73	95	51
PDGFRL	8	9	7	13	5	4	13	2	2	5	4	3	6	5	3	8	1	3	3	5	6	231	58	56	65	145	42	127	41	85	123	51	204	497	55	94	70	275	86	173	73	16	47	102	0	14	56	33	97
PGF	0	0	0	0	1	0	0	0	0	0	0	0	0	0	0	0	0	0	0	0	0	176	428	156	134	153	204	412	72	472	194	189	445	109	136	231	193	142	212	199	148	245	394	110	104	106	308	183	302
PMCH	0	0	0	0	0	0	0	0	0	0	0	0	0	0	0	1	0	0	0	0	0	1	0	0	1	0	0	0	0	0	2	0	2	0	0	2	0	0	2	0	1	6	3	0	0	0	1	1	1
PNOC	1	3	9	0	0	0	2	4	1	3	0	0	1	0	0	1	1	1	1	1	1	126	63	127	63	59	260	61	81	324	116	192	129	16	76	135	208	43	158	27	110	11	22	4	13	1	14	1	0
POMC	0	0	0	1	3	1	1	3	1	3	0	0	1	1	1	1	2	0	2	3	3	19	20	30	7	14	35	21	4	42	34	41	66	95	7	22	39	52	23	53	22	6	11	10	2	4	10	3	4
PPY	0	0	0	0	0	0	0	0	0	0	0	0	0	0	0	0	0	0	0	0	0	1	5	99	37	4	12	4	1	7	27	11	8	2	7	6	16	5	4	13	8	0	1	0	0	0	1	0	0
PRL	4	9	17	5	7	2	3	8	3	7	13	6	1	2	3	7	6	11	3	0	9	2	2	2	0	0	0	0	1	0	0	0	8	5	0	0	0	0	0	2	0	0	0	1	0	0	2	3	0
PRLH	0	0	0	0	0	0	0	0	0	0	0	0	0	0	0	0	0	0	0	0	0	0	1	2	0	0	0	1	0	0	0	0	0	0	0	0	0	0	0	0	0	0	0	0	0	0	0	0	0
PROK1	0	0	0	0	0	0	0	0	0	0	0	0	0	0	0	0	0	0	0	0	0	3	1	4	0	0	0	1	0	1	1	0	1	7	0	1	1	8	0	3	1	2	0	0	0	0	0	0	0
PSPN	0	0	0	0	0	0	0	0	0	0	0	0	0	0	0	0	0	0	0	0	0	89	275	160	134	270	186	213	80	395	246	231	193	113	140	260	299	179	196	252	182	79	217	72	8	74	76	161	175
PTH	0	0	0	0	0	0	0	0	0	0	0	0	0	0	0	0	0	0	0	0	0	0	0	0	0	0	0	0	0	0	0	0	0	0	0	0	0	0	0	0	0	0	0	0	0	0	0	0	0
PTH2	0	0	0	0	0	0	0	0	0	0	0	0	0	0	0	0	1	0	0	0	0	0	0	1	0	0	0	0	0	0	0	0	0	0	1	1	0	0	0	0	0	0	0	0	0	0	2	0	0
PTHLH	0	0	0	0	1	0	0	0	1	1	0	1	0	0	1	1	0	0	0	0	0	35	15	29	30	92	17	58	20	47	69	20	84	183	44	26	35	100	24	61	35	37	23	35	9	13	51	121	25
PTN	10	28	24	50	25	12	17	27	18	16	27	17	23	16	24	33	13	19	46	4	13	317	333	676	579	554	356	698	154	654	734	425	509	1329	282	708	422	1104	599	633	535	32	40	20	4	10	38	108	13
PYY	0	0	0	0	0	0	0	0	0	0	0	0	0	0	0	0	0	0	0	0	0	608	2946	3637	3883	881	1419	3080	547	5761	5218	1293	1577	275	1876	3426	8309	2629	1803	6925	7079	0	3	164	17	1	44	1	3
QRFP	25	71	64	52	56	89	58	59	11	53	21	13	33	114	40	50	199	110	40	14	15	15	69	53	20	41	21	44	30	33	41	46	20	37	16	68	67	55	21	23	53	4	30	5	1	11	2	28	12
RABEP1	97	449	275	230	139	441	249	441	290	367	101	66	442	346	341	129	359	277	429	83	243	1511	2188	2074	1201	2448	1975	2308	1247	2804	2180	2161	2106	2526	1687	2702	2314	2042	1942	2438	1660	1379	1080	708	86	211	672	1615	1243
RABEP2	0	0	0	0	0	0	0	0	0	0	0	0	0	0	0	0	0	0	0	0	0	1278	2013	1835	1142	1971	1417	2080	835	2593	2351	1894	1758	715	1233	2873	2698	950	1909	1626	2321	721	2385	380	425	1053	569	2098	972
REG1A	1	1	0	1	1	0	2	0	1	2	0	0	1	0	0	0	0	1	1	0	0	2251	32024	29	6	928	56	780	3047	31	4	46	13514	28	23	4	16	1	618	40591	0	39119	4329	62864	4615	94	2793	35	12776
RETN	0	0	0	0	0	0	0	0	0	0	0	0	0	0	0	0	0	0	0	0	0	3	7	0	3	3	1	0	0	0	2	1	11	1	1	3	3	6	3	1	0	0	4	19	1	3	22	0	25
RETNLB	2	2	3	1	3	1	3	1	0	2	0	1	1	2	3	5	0	0	0	4	0	484	1784	1384	4832	577	1062	671	361	1536	1009	1412	1579	85	274	1903	3304	1480	1459	883	3730	194	1107	5	350	30	145	66	110
RLN1	21	19	31	14	44	31	17	31	13	19	14	12	17	20	16	35	10	24	13	14	29	5	1	5	7	5	2	2	0	13	3	4	5	0	3	5	6	3	5	1	1	23	5	1	0	1	3	1	0
RLN2	0	0	0	0	0	0	0	0	0	0	0	0	0	0	0	0	0	0	0	0	0	7	9	8	14	6	9	10	5	5	6	14	7	1	3	10	3	3	17	0	5	70	27	6	0	1	3	2	0
RLN3	53	27	60	66	51	34	72	39	39	58	63	27	47	77	33	54	36	65	42	35	117	0	0	0	0	0	0	0	0	3	0	0	0	0	0	0	0	0	2	0	0	0	0	0	0	0	0	0	0
SCG2	95	109	193	91	110	45	65	111	114	119	63	68	151	73	86	70	102	189	113	115	106	304	608	423	236	441	313	2250	234	799	596	319	778	1362	600	764	563	1040	699	1493	459	32	49	46	2	31	88	108	24
SCGB3A1	1006	1344	1601	1343	1353	1659	1840	603	1424	2046	925	584	2041	1621	1595	1545	1004	805	1190	1268	1967	3	5	6	5	3	0	5	2	14	8	4	1	1	7	2	3	3	4	3	2	3	0	0	0	1	2	0	0
SCT	1185	3921	1455	1404	1486	3374	1665	1425	1154	2496	1195	644	2957	3477	1813	1708	3629	1046	1594	1006	1720	26	18	37	15	34	25	30	4	48	30	32	43	10	25	34	52	15	39	187	25	1	62	4	3	15	9	16	4
AIMP1	5	4	6	10	3	9	2	8	19	11	2	14	15	23	9	19	28	24	7	3	6	3571	2345	1924	2041	3052	1970	2376	1356	3048	2368	2106	3300	1589	1684	3294	2591	2230	1723	2765	2203	3150	2482	993	96	366	827	2950	2850
SECTM1	634	965	729	845	929	687	757	669	807	728	554	382	933	915	528	828	690	842	798	468	846	2863	4284	5266	5781	11573	8096	5050	3360	15267	13635	7402	5618	1647	15604	10977	7808	3252	15154	21085	4333	160	173	2789	281	84	855	900	991
SLURP1	130	59	99	83	268	432	41	570	25	66	222	306	108	71	71	246	122	495	122	46	69	0	0	0	0	0	0	0	0	0	0	1	0	0	0	0	0	0	0	0	0	0	0	1	0	0	1	1	0
SPP1	0	0	1	0	0	1	1	1	3	1	1	2	2	1	0	1	2	1	0	0	0	383	824	124	137	287	80	602	137	181	302	375	1431	1535	266	208	206	1278	324	519	84	408	1062	884	135	1966	3606	6912	9065
SST	0	0	0	0	0	0	0	0	0	0	0	0	0	0	0	0	0	0	0	1	0	366	465	1047	296	364	212	174	60	1068	180	172	151	38	357	384	834	402	179	2152	1525	3	3	18	0	2	11	2	0
STC1	6	0	2	4	7	7	3	3	5	6	5	6	9	11	3	13	1	12	0	2	10	195	532	103	49	37	18	375	143	208	169	36	452	189	89	137	88	283	73	397	126	377	275	179	31	117	486	948	620
STC2	0	0	0	0	0	0	0	0	0	0	0	0	0	0	0	0	0	0	0	0	0	24	100	23	12	55	35	291	43	102	137	40	132	555	43	46	53	124	24	123	38	820	1370	64	47	46	112	278	997
TAC1	0	0	0	0	0	0	0	0	0	0	0	0	0	0	0	0	0	0	0	0	0	253	73	46	41	115	15	223	43	167	201	86	167	366	70	68	14	530	120	182	49	56	80	16	9	15	31	5	16
TDGF1	99	59	107	129	202	75	141	119	73	93	121	86	104	97	83	104	38	130	118	84	127	285	158	215	290	227	98	129	131	175	253	164	146	16	98	291	192	104	93	68	326	2621	901	7	200	501	21	80	185
TG	0	0	0	0	0	0	1	0	1	1	0	0	0	1	1	3	0	1	1	1	1	11	24	29	14	8	28	20	5	16	21	21	61	9	9	31	21	28	15	8	14	872	483	7	94	235	39	49	137
TGFA	3	3	2	3	1	0	4	3	0	4	3	3	6	2	3	3	0	22	4	5	6	2866	2141	1978	1467	4148	1417	2124	1791	3296	2267	1827	1792	208	3542	3825	2678	1648	2340	3265	1937	511	653	851	29	182	1093	2191	2562
TGFB2	82	36	57	67	188	16	54	55	33	49	76	34	36	65	22	86	40	108	49	83	74	142	114	42	35	72	21	93	24	59	94	40	118	436	43	58	31	161	55	107	33	102	33	41	2	16	25	238	30
TGFB3	1119	1997	4040	978	1327	2408	1923	1017	969	2329	568	735	2181	1376	1225	1368	1376	1600	937	1147	1925	272	370	334	245	256	123	390	96	550	470	232	545	970	258	231	229	471	274	458	427	54	361	105	2	50	272	305	377
THPO	824	835	784	746	477	1025	1412	959	766	1739	362	679	1885	765	833	385	2100	1192	730	388	2200	5	12	10	3	4	6	12	2	8	4	6	16	18	4	9	5	5	6	10	4	1	7	2	0	1	2	0	4
TNFRSF11B	0	0	0	0	0	0	0	0	0	0	1	0	0	0	0	0	0	0	0	0	0	310	113	246	364	316	164	112	121	377	247	199	454	35	151	258	282	260	182	208	302	688	210	254	23	362	150	231	158
TNFSF12	2	12	5	3	17	17	15	4	7	12	5	7	11	6	7	4	10	7	2	4	7	858	1109	798	879	807	680	1166	298	1249	1355	835	1308	3367	449	980	762	1776	871	1062	854	201	388	140	126	262	319	422	521
TNFSF13	0	0	0	0	0	0	0	0	0	0	0	0	0	0	0	0	0	0	0	0	0	1121	2059	1154	1273	1512	1650	1388	675	2062	1465	1591	2565	332	821	1578	1852	878	1449	1072	1681	380	665	271	218	209	440	1262	1156
TNFSF13B	2111	2186	2876	3246	3109	1585	4162	1118	1736	3661	3450	2146	3086	3496	3405	3295	1598	3430	1588	2503	4627	356	309	253	340	211	410	225	117	409	156	259	420	110	143	281	199	255	321	169	233	88	89	158	6	3	103	166	156
TNFSF14	1637	3769	3266	2412	2581	3374	3111	1600	1881	4178	1393	1059	3521	3786	2502	2910	2815	1908	1655	1553	3069	67	215	41	117	109	180	71	17	205	97	143	127	19	48	182	102	80	324	94	59	30	29	14	49	28	39	33	38
TNFSF15	63	44	51	65	64	62	77	88	93	101	86	73	100	62	96	70	64	79	92	54	72	296	229	156	214	268	171	128	136	310	251	216	227	384	129	447	184	327	195	5418	190	640	476	464	50	81	299	1023	829
TNFSF18	0	0	0	0	0	0	0	0	0	0	0	0	0	0	0	0	0	0	0	0	0	19	20	7	10	3	18	11	11	4	9	19	12	10	9	19	17	3	18	9	1	18	4	1	0	6	8	4	1
TNFSF8	0	0	0	0	0	0	0	0	0	0	0	0	0	0	0	0	0	0	0	0	0	118	37	141	62	70	129	114	60	261	61	102	162	39	155	106	118	127	109	47	76	37	23	12	3	6	20	23	3
TNFSF9	7	22	10	14	29	12	22	5	16	7	13	10	13	11	9	15	15	7	14	19	18	19	69	24	60	33	44	43	17	26	74	18	61	34	19	42	25	44	45	30	89	200	426	3194	222	59	1152	361	1363
TOR2A	0	0	0	0	0	0	0	0	0	0	0	0	0	0	1	0	0	0	0	0	0	1027	1457	1411	1210	1728	1254	1318	530	2073	2066	1473	1460	267	1128	1966	1781	766	1409	1401	1485	903	760	369	450	718	548	1814	1185
TRH	411	571	1045	404	971	1632	1227	420	434	932	281	355	797	1319	475	699	313	826	660	387	849	1	0	0	0	0	0	0	0	0	0	0	3	0	0	3	0	1	0	1	0	0	0	0	0	0	1	0	0
TSHB	0	0	0	0	0	0	0	0	0	0	0	0	0	0	0	0	0	0	0	0	0	1	2	0	0	2	1	4	2	0	2	1	0	8	1	1	1	8	0	5	3	0	0	0	0	0	0	0	0
TSLP	44	35	34	33	19	22	28	17	18	54	21	9	23	32	28	37	20	32	24	51	42	41	52	33	43	36	36	59	39	48	18	43	59	86	21	72	39	50	36	26	32	10	11	33	0	2	25	11	18
TXLNA	0	0	0	0	3	0	0	0	0	0	0	0	0	0	1	2	0	0	0	0	1	2306	4017	3219	1947	3969	3035	3585	1505	4640	3396	3479	4198	3394	2321	4424	4290	2557	3277	2899	3594	1650	2800	2359	387	1037	2059	7586	3638
UCN	0	1	0	0	0	0	0	0	0	0	0	0	0	0	0	0	0	0	0	0	0	4	11	17	11	9	15	20	4	7	2	12	0	9	6	12	12	4	14	17	9	36	41	18	2	20	20	43	12
UCN2	0	0	1	1	3	0	1	3	1	4	0	0	0	0	1	0	0	2	1	0	0	1	1	2	0	1	3	4	1	1	2	1	1	3	1	1	1	0	2	2	1	6	41	20	19	6	11	12	47
UCN3	0	0	0	0	0	0	0	0	0	0	0	0	0	0	0	0	0	0	0	0	0	38	113	190	134	64	144	181	35	390	211	95	95	73	97	128	225	148	146	655	266	62	56	11	40	114	4	0	7
UTS2	0	6	3	0	0	1	6	1	0	0	0	1	2	1	0	0	0	0	2	2	1	8	2	15	24	4	12	7	3	10	13	6	11	2	4	3	12	5	5	79	3	230	1	10	3	3	4	13	368
UTS2B	81	79	130	94	147	63	78	118	51	86	131	99	95	120	90	128	54	164	90	67	114	29	6	16	1	9	46	25	18	29	8	45	21	7	14	25	56	16	33	10	9	2	1	0	0	0	0	2	1
VEGFB	3	1	0	1	1	0	1	2	0	1	1	0	1	0	0	3	0	1	0	0	1	1537	2412	1481	1575	2207	1705	2345	749	3409	3403	2093	2352	4384	1242	2414	2320	2644	1923	3682	1772	1273	1794	600	794	1899	1441	2401	1220
VEGFC	0	1	0	0	0	0	0	1	0	0	0	0	2	0	2	1	0	0	0	0	0	80	372	144	97	175	82	191	54	332	194	156	266	243	93	106	105	238	140	243	146	89	70	60	8	26	87	136	126
VGF	110	202	259	339	221	109	185	121	166	205	98	73	157	324	208	161	104	71	214	132	242	4	68	6	12	47	15	151	18	67	65	17	57	60	52	19	49	50	31	34	14	50	38	102	53	23	54	62	61
VIP	30	26	32	11	74	16	6	19	12	18	18	23	17	22	19	30	13	22	29	58	31	4681	2592	864	1245	2166	966	14594	867	2062	1775	1269	3155	3244	2763	3993	557	3024	3594	2359	828	68	42	144	44	131	179	102	0
ACVR1B	0	0	0	2	2	0	0	0	0	0	0	1	0	0	1	0	1	0	0	1	2	2574	6322	6241	4956	7429	4772	5020	2971	8277	7756	6534	3912	1198	4879	9613	7099	3546	5114	7089	6517	2438	1865	881	596	1821	1394	3366	1477
ACVR1C	0	0	0	0	0	0	0	1	0	0	0	0	0	0	0	0	0	0	0	0	0	392	1137	714	663	916	646	687	594	1241	657	806	378	78	669	1290	834	664	609	810	952	100	274	113	0	3	86	198	181
ACVR2A	0	0	0	0	0	0	0	0	0	0	0	0	0	0	0	0	0	0	0	0	0	674	804	882	718	1532	932	970	751	1574	1004	894	883	654	1098	1550	1188	956	866	2527	889	309	230	255	18	75	270	732	861
ACVR2B	0	0	0	0	1	0	0	0	0	0	0	0	0	0	0	0	0	0	0	0	0	106	569	418	273	492	288	447	184	477	369	499	227	548	210	705	341	336	330	412	389	384	377	223	55	120	133	431	477
ACVRL1	1590	2926	2159	1459	1845	1343	2148	1104	1331	2263	878	1044	2503	1306	962	1187	2104	1126	1057	2979	3443	4953	10902	10516	8054	10515	8431	8347	3827	14283	14372	9042	12592	1957	5963	12202	10739	4487	10447	1703	10408	1018	1994	1164	1486	2152	1449	596	933
ADCYAP1R1	0	0	1	1	0	1	1	1	0	0	0	0	4	1	3	0	0	1	2	0	0	58	160	51	22	85	35	701	55	146	182	84	123	1317	134	91	55	455	120	307	76	1	1	4	0	1	17	1	2
ADIPOR1	1562	1537	1871	1878	3009	1520	2086	2257	1009	1893	2649	2189	2761	1739	1773	2087	1255	2711	1913	1693	2402	4107	5233	4794	4462	6414	4879	4168	2426	7678	5589	5085	5589	2698	3677	7386	6011	3724	4553	6665	4562	4892	1840	2818	709	2462	2966	8516	4762
ADIPOR2	0	0	0	0	0	0	0	0	0	0	0	0	0	0	0	0	0	1	0	0	0	4453	6649	6021	4555	9177	6543	5608	3832	9506	7552	6004	7200	3307	7678	9944	7562	4561	6564	9951	6293	3900	4502	2018	459	1808	2094	8492	4870
ADRB1	1	1	1	2	1	2	3	2	3	1	3	3	3	2	0	2	1	2	1	1	2	81	71	64	108	170	103	79	52	233	73	145	67	106	41	208	74	111	116	250	53	18	7	12	0	5	34	52	8
ADRB2	0	0	0	0	0	0	1	0	1	0	0	2	1	0	0	0	1	3	1	0	0	106	112	118	72	148	145	200	63	190	101	176	175	101	85	159	133	149	171	137	121	9	4	19	4	6	25	6	6
AGTR1	0	0	0	0	0	0	0	0	0	0	0	0	0	0	0	0	0	0	0	0	0	101	256	55	42	132	21	360	36	104	231	43	294	2047	71	58	37	619	42	139	85	2	1	1	0	0	20	0	7
AGTR2	2	2	5	3	6	2	4	2	3	7	4	1	1	1	3	8	2	3	1	12	5	1	1	0	1	2	1	2	0	3	8	0	0	46	2	0	0	12	0	0	1	0	0	0	0	0	0	0	0
AMHR2	1	0	0	1	0	0	0	0	0	0	0	0	0	0	0	0	0	0	0	0	0	2	5	8	8	5	3	4	2	8	4	9	6	1	2	7	13	3	9	20	3	0	3	1	0	0	4	2	0
ANGPT1	2	0	3	1	4	0	1	0	0	2	0	1	0	1	0	5	1	1	3	0	1	204	327	183	176	233	133	342	91	197	141	138	195	780	129	236	101	469	166	216	174	84	38	7	1	7	26	40	40
ANGPT4	0	0	0	0	0	0	0	0	0	0	0	0	0	0	0	0	0	0	0	0	0	2	27	15	0	1	2	36	0	3	4	3	2	13	3	5	4	8	4	2	0	2	1	0	1	1	2	5	3
ANGPTL1	0	0	0	0	0	0	0	0	0	0	0	0	0	0	0	0	0	0	0	0	0	659	754	599	223	472	116	1534	235	341	1195	395	1127	7289	249	485	296	2256	529	1663	509	14	4	4	2	10	51	10	8
ANGPTL2	1648	3961	2152	2006	3402	3369	3822	1139	2443	3931	1631	1162	3869	3545	2722	2334	3205	1341	1682	1922	3894	1004	3775	1435	613	1562	590	2667	532	1596	3287	1294	4386	10459	1074	1616	1219	3071	1624	2773	1151	655	1180	824	216	545	1877	2700	1317
ANGPTL3	1	2	3	1	3	0	0	9	1	1	3	3	1	1	1	0	2	7	2	3	4	0	5	3	2	2	0	3	3	2	0	0	2	4	2	5	0	0	2	1	1	1	4	1	0	0	1	0	3
ANGPTL4	2846	6623	5643	3786	5179	5306	6080	2697	3985	7028	3322	2012	6929	6199	4618	4030	5175	3040	3721	3884	5862	377	278	101	199	279	161	412	78	246	346	342	784	290	117	178	270	581	329	6545	274	35	424	364	41	240	374	1469	1877
ANGPTL6	0	0	1	1	0	0	0	0	0	0	2	0	1	0	0	1	0	1	0	0	0	13	9	114	34	17	45	42	10	41	25	37	38	8	25	24	35	12	40	39	48	12	12	6	5	2	6	17	9
APLNR	2	2	4	2	8	1	1	0	0	8	2	4	4	3	5	7	5	4	3	0	6	422	908	907	1015	1255	781	379	390	1831	850	1298	1019	652	397	1339	825	964	683	629	1039	490	934	398	51	162	600	114	773
AR	204	194	291	208	430	128	269	250	194	223	134	164	207	279	133	109	110	209	345	110	228	38	343	57	55	217	64	355	93	204	248	99	126	1802	189	170	116	435	152	208	133	9	29	7	0	61	27	65	9
AVPR1A	1067	1435	1258	1038	1444	1216	1534	855	1149	1635	842	835	1597	1528	1220	1083	1096	1048	1074	1183	1543	80	318	65	30	69	12	227	48	48	53	54	67	175	58	74	21	141	44	57	48	17	23	40	2	5	45	28	84
AVPR1B	0	0	1	0	0	0	0	0	0	0	0	0	0	0	0	0	0	0	0	0	0	2	13	13	3	5	9	14	4	19	6	4	11	13	9	9	19	5	6	15	17	0	0	0	0	3	1	1	0
AVPR2	1	18	4	13	11	7	6	5	10	10	4	3	5	15	11	5	8	11	12	4	8	24	81	54	32	37	21	75	4	77	70	67	89	141	22	40	28	75	48	47	49	8	59	11	37	36	42	21	5
BMPR1A	0	0	0	0	0	0	0	0	0	0	0	0	0	0	0	0	0	0	0	1	0	1451	1896	1342	975	1826	1026	1736	835	1920	1816	1269	1506	3760	1152	2069	1250	2599	1190	2613	1373	1161	710	551	34	246	393	1094	803
BMPR1B	238	208	165	334	415	93	204	491	84	225	373	391	412	145	377	304	113	927	273	252	488	34	27	3	12	35	0	173	14	6	25	0	28	216	33	4	6	129	4	25	4	4	9	2	3	3	9	12	18
BMPR2	41	31	47	25	70	34	41	48	28	43	24	22	35	46	28	24	26	29	31	30	50	1795	5262	2715	2013	4547	2593	4069	2273	5275	4061	3062	3218	5210	3272	4660	3536	3712	2877	4763	2665	2436	1260	895	40	387	892	4329	2091
BRD8	10	12	23	17	22	14	19	13	16	27	26	8	21	35	17	24	15	23	13	23	34	1596	2521	2181	1422	1957	1617	2175	820	2019	1639	1890	1787	2228	1036	3066	2147	1702	1735	1436	2067	1555	1607	896	210	1155	575	3633	1114
C3AR1	0	0	0	0	0	0	0	0	0	0	0	0	0	0	0	0	0	0	0	0	0	636	768	915	421	660	865	273	197	752	546	831	1132	275	354	1122	750	400	842	566	370	107	108	187	17	51	265	246	182
CALCR	216	353	1349	1187	816	170	322	314	180	351	324	123	306	718	241	660	167	939	405	289	327	6	1	9	3	11	2	2	4	13	2	11	6	1	3	12	2	5	2	10	3	0	6	1	0	2	0	1	0
CALCRL	1991	3727	2249	2156	3211	2764	3079	2583	2543	3340	2226	1554	4501	3198	2588	2535	2691	2396	2748	3387	3163	750	1091	677	626	736	311	448	343	810	506	621	858	678	431	507	329	955	514	645	502	500	192	203	12	34	239	229	311
CNTFR	2	1	0	1	4	1	1	0	0	1	0	0	0	1	0	3	0	0	0	1	0	925	250	642	325	3572	774	867	662	2180	762	1249	211	492	1360	3301	629	820	1144	3978	565	24	1	13	27	4	93	0	86
CRHR1	0	0	0	0	0	0	0	0	0	0	0	0	0	0	0	0	0	0	0	0	0	3	0	0	0	0	0	1	0	0	2	0	1	1	0	0	0	1	0	13	1	0	0	1	0	1	0	0	0
CRHR2	1	0	1	0	0	0	0	0	0	2	0	1	0	0	0	1	0	0	0	0	1	4	30	36	9	11	3	22	5	15	19	19	14	14	17	9	23	9	13	6	15	6	0	3	0	1	1	3	1
CRIM1	0	0	0	0	0	0	0	0	0	0	0	0	0	0	0	0	0	0	0	0	0	2612	8305	4072	2855	7305	3454	5398	2808	8479	5679	5163	4774	5346	4041	7613	6329	5048	5008	4236	5150	3461	2049	1477	270	1201	1241	4959	3311
CRLF1	0	0	0	0	0	0	0	0	0	0	0	1	0	0	0	0	1	0	0	0	0	142	266	52	64	131	35	229	27	119	73	42	163	191	85	62	38	101	87	38	74	17	59	20	4	45	43	36	11
CRLF2	25	19	13	42	9	23	13	42	26	23	11	46	141	35	36	21	36	24	12	13	14	1	3	14	3	7	8	5	3	16	1	12	19	4	7	3	5	9	14	3	4	1	9	3	0	6	0	2	1
CRLF3	0	0	0	0	0	0	0	0	0	0	0	0	0	1	0	1	0	0	0	0	0	852	675	846	887	918	1319	774	463	1587	685	930	1399	350	844	1241	1170	923	907	495	914	478	746	535	80	129	340	1186	530
CSF1R	8	16	12	4	9	4	10	2	6	13	7	2	11	22	8	11	8	9	6	7	19	2083	2742	4977	1602	4337	5342	1513	1040	4693	2858	5439	4449	1952	1715	6602	5040	2559	7330	3725	2722	396	506	457	213	372	823	623	471
CSF2RA	373	453	528	387	700	429	507	255	383	499	413	190	572	520	384	524	338	531	305	503	528	383	168	375	270	259	322	143	110	444	211	384	489	91	214	519	397	190	381	224	216	37	86	53	67	35	106	76	45
CSF2RB	0	0	0	0	0	0	0	0	1	2	2	0	0	1	0	1	1	0	4	3	1	894	1387	1905	768	1312	2557	721	974	3244	1454	2679	2323	311	1213	2220	3260	1030	2414	549	1315	189	217	243	104	40	303	161	127
CSF3R	0	0	0	0	0	0	0	0	0	0	0	0	0	0	0	0	0	0	0	0	0	398	259	259	122	388	427	144	115	259	178	266	590	129	160	234	405	772	389	264	229	81	137	181	34	22	400	115	174
EGFR	20	28	29	14	43	20	28	40	17	16	15	24	28	25	19	34	17	14	14	34	21	1709	6964	5124	2289	8670	3825	5637	3154	8068	6295	5397	4297	3815	5723	10259	8244	4864	5405	4076	4992	1477	2229	1251	131	351	961	4473	2946
ENG	0	0	0	0	0	0	0	0	0	0	0	0	0	0	0	0	0	0	0	0	0	1637	9326	3036	1647	4182	3218	4193	1024	5491	4021	4445	7090	4010	1801	4310	3928	3500	4482	3179	2758	1706	2624	1336	737	870	2167	2010	2554
EPOR	39	102	73	61	62	38	47	34	36	90	67	53	128	27	94	76	73	103	34	23	63	90	245	173	118	119	137	174	35	224	111	173	163	200	55	191	132	130	120	56	186	65	196	64	16	98	165	203	89
ESR1	57	78	72	48	60	51	49	10	47	77	14	17	52	69	40	75	39	56	35	68	80	25	119	102	54	105	73	117	40	128	92	101	74	103	54	113	99	63	90	46	71	7	13	7	1	2	14	14	3
ESR2	5	4	10	4	4	12	8	13	10	4	2	6	7	6	4	8	9	3	11	1	7	32	61	109	38	53	150	57	44	116	69	135	62	3	65	101	221	22	89	28	76	9	14	9	0	0	10	26	9
ESRRA	74	66	93	47	63	52	87	20	44	72	65	22	100	83	58	74	46	34	29	61	53	8759	7989	7349	6259	12428	6663	7367	3855	11733	10837	8380	8535	1712	6448	13286	10963	3907	7745	13543	8723	4001	5299	2001	1830	2330	2172	4500	3483
ESRRB	0	0	0	0	0	0	0	0	0	0	0	0	0	0	0	0	0	0	0	0	0	4	10	4	0	7	5	5	3	1	7	5	4	9	3	4	4	3	6	2	2	0	6	0	0	0	0	0	0
ESRRG	0	2	1	1	2	2	2	1	2	7	1	0	4	3	4	0	3	2	1	2	5	128	91	13	12	148	30	74	46	44	22	16	37	233	16	78	34	63	55	1043	22	20	133	4	0	4	8	174	3
FGFR1	2	5	14	0	2	3	3	0	2	8	3	5	4	0	1	2	2	0	35	2	6	1883	3150	1675	920	2273	968	5360	767	2781	3423	1816	3134	12189	1747	1921	1501	5203	1695	3281	1900	387	817	402	158	511	922	774	545
FGFR2	63	282	717	78	68	27	35	22	36	99	9	11	41	31	29	177	28	21	91	82	70	1769	3339	2835	1936	7338	3346	2633	2030	4969	3622	3370	1875	6711	2466	6732	2984	3664	3330	1626	2034	161	109	182	30	61	393	2386	291
FGFR3	25	84	50	51	31	90	54	32	143	158	36	26	211	86	109	39	32	109	20	20	31	1617	2321	3724	1667	1277	1976	2339	1158	3363	2899	2495	1966	228	2479	3528	3028	1387	2127	2534	3965	765	1632	196	179	560	988	2714	1210
FGFR4	0	0	0	0	0	0	0	1	0	0	0	0	0	0	1	0	0	0	1	0	0	2633	4507	2726	2070	2834	1998	3563	1039	3397	2843	2811	2624	339	1307	4096	3997	1355	2692	3316	2660	4472	1229	358	2470	6074	2156	8697	652
FGFRL1	2	2	1	1	1	1	0	1	0	0	0	4	1	1	1	0	0	5	2	0	5	425	1450	917	637	1128	819	734	406	1345	1148	991	960	538	767	1403	1238	564	834	756	1088	2141	4617	855	1493	3082	1692	3593	1884
FLT1	136	116	198	235	98	70	190	40	89	194	43	18	181	132	227	130	89	31	133	106	152	357	1878	859	377	1268	526	1111	681	1696	897	1143	1250	1396	796	1247	1057	1258	833	1096	815	1468	680	439	52	287	541	1645	817
FLT3	0	0	0	0	0	0	0	0	0	0	0	0	0	0	0	0	0	0	0	0	0	40	18	121	63	97	118	53	29	155	63	130	74	39	43	99	105	66	158	49	62	4	12	14	0	2	13	4	3
FLT4	37	30	96	51	34	55	90	32	88	166	14	39	138	78	70	42	320	27	36	47	112	147	1024	349	217	575	166	335	77	689	574	421	616	713	281	488	253	542	374	608	743	170	271	80	26	136	217	188	123
FSHR	0	0	0	0	0	0	0	0	0	0	0	0	0	0	0	0	0	0	0	0	0	0	0	0	0	0	0	0	0	0	0	0	0	2	0	0	0	0	0	0	0	0	0	0	0	0	0	0	0
GALR2	1887	2427	2710	2252	3452	2894	3162	1962	2399	3378	1954	1400	3034	3080	2235	2375	1824	2299	2805	2008	2949	11	16	3	4	62	4	5	13	8	22	2	9	156	2	7	6	36	9	95	3	2	3	8	4	10	18	5	1
GALR3	1	1	2	1	1	3	1	1	2	3	3	1	1	0	1	6	0	4	2	2	1	1	0	2	1	1	2	3	1	0	4	2	0	1	0	0	0	1	2	0	0	1	2	1	1	1	0	0	1
GCGR	0	0	0	0	0	0	0	0	0	0	0	0	0	0	0	0	0	0	0	0	0	6	18	11	2	2	10	64	2	20	12	13	4	10	11	9	5	6	14	23	18	2	4	1	1	2	6	5	0
GHR	1290	2332	1991	1735	2160	2124	2702	847	1491	3011	1332	1079	2859	2164	2296	1710	1664	1357	1513	1994	4306	229	777	1486	502	648	93	431	110	386	460	581	328	995	312	381	297	613	127	451	1978	23	21	14	13	14	58	37	10
GHRHR	0	0	0	0	0	0	0	0	0	0	0	0	0	0	0	0	0	0	0	0	0	0	1	1	2	1	0	2	1	2	2	0	1	3	0	2	1	3	0	1	2	0	0	0	0	0	1	6	0
GHSR	0	0	0	0	0	0	0	0	0	0	0	0	0	0	0	0	0	0	0	0	0	1	0	2	0	0	0	0	0	0	0	0	0	5	0	0	1	0	0	1	1	0	2	0	0	2	0	0	1
GIPR	0	0	0	0	0	0	0	0	0	0	0	0	0	0	0	0	0	0	0	0	0	52	103	435	139	103	201	207	42	129	114	230	116	10	223	162	162	49	91	70	629	23	70	35	15	73	57	93	43
GLP1R	738	1149	1050	1149	980	832	1426	859	982	1573	950	747	1282	1002	1564	924	898	890	975	966	1590	0	11	7	4	6	1	4	1	1	0	0	1	4	7	2	4	1	4	7	5	2	2	0	0	0	0	2	1
GLP2R	0	0	0	0	0	0	0	0	0	0	0	0	0	0	0	0	0	0	0	0	0	384	589	880	413	626	471	1132	256	512	630	664	367	462	362	866	585	807	362	892	479	20	10	6	0	7	31	1	0
GNRHR	0	0	0	1	0	0	1	0	0	0	0	0	0	0	0	1	0	0	0	0	1	0	1	1	2	2	1	3	0	1	1	2	3	2	2	0	0	3	1	1	2	0	1	0	0	0	0	6	2
GPER1	0	0	0	0	0	0	0	0	0	0	0	0	0	1	0	0	0	0	0	0	0	102	460	365	443	398	428	598	89	550	730	514	510	2020	149	483	252	623	294	226	630	48	56	47	21	44	141	197	82
HNF4A	0	0	0	0	0	0	0	0	1	0	0	0	0	0	0	0	0	0	0	0	0	7539	19392	14773	10975	28150	15742	15778	10357	28902	20284	20883	15014	2114	19139	32767	26758	10715	17836	21817	20018	9435	9938	2602	2339	6398	3389	14409	8232
HNF4G	0	0	0	0	0	0	0	0	0	0	0	0	0	0	0	0	0	0	0	0	0	3113	4248	3160	2376	4850	2505	3057	2428	4280	3494	3160	2932	311	3065	5475	3785	2396	2676	20823	3186	1603	573	442	21	128	425	3370	995
HTR3A	0	0	0	0	0	0	0	0	0	0	0	0	0	0	0	0	0	0	0	0	0	25	73	10	13	41	61	154	34	139	108	65	71	216	45	46	57	173	51	86	38	1	1	9	0	2	12	12	1
HTR3B	0	0	3	2	3	1	0	3	1	2	1	1	0	6	0	1	2	2	2	3	2	1	0	2	0	2	1	8	2	10	3	0	3	7	2	2	3	8	2	8	0	0	0	0	0	0	0	1	0
HTR3C	0	0	0	0	1	0	0	0	0	0	1	0	0	0	0	0	0	0	0	0	0	20	87	25	2	84	17	43	52	29	18	16	17	6	43	73	81	13	42	41	30	0	1	1	0	0	3	0	0
HTR3D	1	0	0	3	0	0	1	1	2	3	1	0	1	1	1	3	1	2	4	0	2	0	0	0	0	0	0	1	0	0	0	0	0	0	0	0	0	0	0	0	0	0	1	0	0	0	0	0	2
HTR3E	0	2	1	0	0	0	0	0	2	0	3	1	0	0	1	1	4	0	0	0	1	43	340	60	12	193	46	133	73	130	59	61	46	12	75	185	218	106	68	45	52	1	1	1	1	0	1	0	0
IFNGR2	2	0	0	1	1	0	0	0	2	1	1	3	3	0	0	2	2	3	0	1	2	5485	5180	6280	5903	11396	5608	4176	4213	11185	10633	5393	7032	1870	6560	11203	8187	5541	7001	9363	4888	5489	2176	1847	704	1194	2763	5004	4413
IGF1R	5	2	5	5	4	2	4	3	4	7	1	3	5	4	4	3	2	2	4	5	2	564	4100	2545	1135	2566	1482	2830	885	3640	2945	3136	1936	4742	1801	4160	3097	2534	1562	2031	3728	1263	771	1291	224	717	909	3447	1290
IGF2R	2704	4772	3488	3122	3638	5062	5936	2582	3401	6152	1943	1753	6069	4924	3991	3512	3500	2567	3333	3345	4588	2825	15778	9201	4272	17576	9266	8631	5656	18957	14283	12198	8211	7588	12410	17603	14187	7311	11192	9615	12432	6964	7978	3331	956	3044	2196	7515	4894
IL10RA	42	28	43	57	40	18	23	37	21	31	55	38	44	49	28	34	40	65	28	31	45	1355	1188	2644	987	1483	2980	989	611	3122	1977	2058	2601	766	1082	2193	2922	1309	3453	1327	1763	130	301	201	126	109	421	224	124
IL10RB	0	0	0	0	0	0	0	0	0	0	0	0	0	0	0	0	0	0	0	0	0	5513	3975	3838	5893	7636	4422	3257	2555	9125	6035	4169	4664	1116	4875	7698	5772	3133	4586	5807	4014	2859	1141	832	505	541	1065	5405	2245
IL11RA	308	226	149	142	301	158	110	434	63	233	420	434	347	181	268	176	267	486	139	149	261	409	510	665	314	425	347	962	165	467	568	441	458	1516	315	515	387	951	370	674	708	109	241	38	84	66	88	305	65
IL12RB1	0	0	0	0	0	0	0	0	0	0	0	0	1	0	0	1	0	0	0	0	0	270	212	266	163	231	671	306	99	545	304	424	414	65	153	445	359	119	739	203	239	77	229	85	156	44	78	92	16
IL12RB2	1	0	0	0	0	0	0	2	0	1	0	1	1	1	0	0	1	4	0	0	0	19	64	20	21	23	52	19	9	48	12	15	31	18	20	33	29	17	66	13	23	9	9	10	0	3	18	10	4
IL13RA1	0	0	0	0	0	0	0	0	0	0	0	0	0	0	0	0	0	0	0	0	0	5787	11344	8329	5995	12246	7025	7171	4819	11354	9016	8535	8950	6094	6536	12722	9509	6958	8235	16184	7108	9098	4155	1900	274	1007	3588	13255	4633
IL13RA2	0	0	0	0	0	3	1	0	0	0	0	0	0	0	1	0	0	0	0	0	0	26	20	6	12	26	9	19	15	22	16	12	66	13	10	18	20	16	16	15	9	37	26	14	2	2	15	3	22
IL15RA	45	59	70	63	112	34	77	42	50	63	39	21	67	51	28	71	48	30	77	46	70	550	1207	724	646	565	1067	1137	358	910	765	836	1160	362	434	911	797	555	1236	789	577	783	934	1085	200	243	390	1520	873
IL2RB	0	0	0	0	3	0	0	0	2	2	0	0	0	0	0	2	1	0	0	3	0	577	992	747	1134	1191	2421	671	328	2244	1141	1498	1225	131	507	1640	1145	646	2543	1230	970	183	286	260	63	57	330	548	65
IL17RA	3251	3093	6638	2706	7283	5680	5130	3321	2865	6208	3417	2640	4598	6730	2783	3957	2267	4019	3233	3137	3760	882	2408	2474	1275	2651	2109	1866	969	3941	2666	2539	1724	838	1941	3125	2938	1621	2485	2297	2366	547	1529	763	258	350	967	2186	1093
IL17RB	0	0	0	0	0	0	0	0	0	0	0	0	0	0	0	0	0	0	0	0	0	1077	1474	1045	815	1095	563	985	296	1158	570	705	767	175	386	1081	939	559	490	734	681	1164	225	371	55	239	944	1689	156
IL17RC	6	13	8	2	19	10	2	26	0	3	2	7	7	3	4	1	4	52	3	2	4	1220	2137	1848	1374	1883	1489	1936	527	2296	2286	1642	2117	1792	1021	2117	2008	1118	1853	4682	1659	538	1049	745	455	841	974	2141	616
IL17RD	79	69	122	162	50	52	85	106	64	68	59	30	70	96	134	45	34	52	93	54	206	117	303	213	171	343	45	469	101	217	500	159	251	2325	144	202	161	884	106	278	276	604	60	162	45	278	251	133	107
IL17RE	0	2	0	0	5	1	4	0	1	3	1	1	1	0	2	0	1	3	0	4	3	1499	3318	3450	2514	3947	2978	3065	1444	3771	4977	3752	2860	417	2463	4116	4023	2029	3202	5101	3742	1625	2368	470	545	955	878	2619	1399
IL18R1	0	0	0	0	0	0	0	0	0	0	0	0	0	0	0	0	0	0	0	0	0	160	240	270	136	381	295	242	197	540	146	271	260	46	227	248	304	142	357	159	156	63	332	56	3	22	82	1018	6
IL18RAP	352	294	483	478	686	218	304	242	436	362	355	162	354	443	278	524	275	444	333	236	439	118	55	111	88	60	151	81	31	141	32	85	80	8	61	68	89	107	178	94	54	17	36	13	3	3	23	25	7
IL1R1	0	0	0	0	1	0	0	0	0	0	1	0	0	0	0	0	0	0	0	0	0	2217	6766	2379	1355	2507	1883	3387	1217	3596	1863	2170	3503	1705	1517	3409	2443	2295	2209	1765	2253	710	793	344	25	128	846	1132	675
IL1R2	0	2	0	0	0	0	0	0	0	0	0	0	0	0	0	0	0	0	0	0	0	1813	1111	3059	3978	2568	1217	873	461	2822	2378	2443	2543	262	895	3771	1830	1088	1406	72	2411	46	531	424	25	32	1150	229	175
IL1RAP	1	1	1	0	0	2	3	0	1	0	0	0	2	0	4	0	0	2	1	1	1	226	246	217	182	268	106	180	109	285	195	199	317	128	172	356	326	195	189	288	219	272	109	104	7	49	232	837	272
IL1RL1	0	0	0	0	0	0	0	0	0	0	0	0	0	0	0	0	0	0	0	0	0	96	434	130	35	61	57	40	31	147	40	88	213	58	66	52	103	43	105	62	75	88	23	17	12	6	41	21	5
IL1RL2	360	916	1215	302	476	461	357	458	431	768	275	208	386	528	227	515	285	275	467	384	292	37	86	62	40	90	44	98	34	77	73	80	98	12	19	60	90	36	71	6	45	142	185	27	17	32	29	106	75
IL20RA	0	0	0	1	0	0	2	0	1	2	0	0	0	1	0	2	0	0	0	2	4	802	667	427	680	1027	699	498	430	421	794	682	655	159	390	1111	544	515	713	133	564	1305	2069	512	122	438	453	866	1754
IL20RB	1	0	1	0	0	0	0	0	0	0	2	0	0	0	0	1	0	0	0	0	0	67	53	55	34	55	31	62	21	84	21	37	43	22	38	30	43	45	63	29	42	21	36	6	0	12	15	383	16
IL21R	4	2	3	5	3	5	2	8	3	1	0	2	10	2	3	2	9	8	6	7	8	29	63	52	79	93	543	144	73	612	68	288	249	7	84	100	287	146	358	35	158	28	70	35	21	12	69	63	13
IL22RA1	0	0	0	0	0	0	0	0	0	0	0	0	0	0	0	0	0	0	0	0	0	1568	1447	3012	1874	3341	3041	1706	860	4480	4548	2040	3745	311	3208	3600	6080	1518	3215	9933	2181	2876	1708	379	286	705	469	2754	2499
IL22RA2	569	556	646	610	720	546	827	608	836	936	536	384	886	784	808	541	549	609	816	730	923	4	3	11	20	17	63	48	47	78	0	31	16	0	17	17	28	76	22	3	38	6	2	2	0	0	4	1	0
IL23R	918	754	943	1444	934	993	1523	993	1380	1187	424	997	1355	1078	1139	741	931	1119	1664	865	1363	76	70	71	63	127	59	43	22	88	76	96	60	3	79	110	104	30	40	23	66	69	8	8	2	4	6	23	14
IL27RA	0	2	2	2	0	0	1	0	0	0	0	0	1	0	1	3	3	2	0	2	0	272	513	337	304	406	612	579	180	895	371	653	734	190	232	538	559	364	584	208	398	990	961	161	50	108	441	951	731
IL2RA	0	1	3	1	2	0	1	0	2	1	3	0	1	0	1	4	0	1	3	3	2	366	100	214	59	97	267	130	145	562	79	164	387	42	169	309	280	112	294	98	111	62	129	115	36	9	104	91	18
IL2RG	21	12	27	19	11	9	8	20	6	10	36	22	17	18	11	17	16	46	11	8	17	3195	3284	5702	6270	8274	6309	5013	3165	12240	7031	6542	5049	800	7163	5600	9007	4048	7074	7832	7010	2527	1520	550	724	4132	1097	2750	6288
IL31RA	0	0	0	0	0	0	0	0	0	0	0	0	0	0	0	0	0	0	0	0	0	5	2	9	5	5	6	4	4	5	7	2	1	35	2	0	4	5	8	3	5	2	3	3	0	0	2	0	1
IL3RA	0	0	0	0	0	0	0	0	0	0	0	0	0	0	0	0	0	0	0	0	0	331	640	657	390	343	1033	590	196	1279	906	792	1390	465	326	635	603	660	1130	269	647	345	317	143	153	71	96	147	220
IL4R	0	0	0	0	0	0	0	0	0	0	0	0	0	0	0	0	0	0	0	0	0	3596	6021	6134	3976	8306	5364	6757	3283	11698	9225	7008	6030	6100	6132	9638	7306	4970	6073	5948	6054	1514	3804	1251	614	1423	1920	6755	2386
IL5RA	0	0	0	0	0	0	0	0	0	0	0	0	0	0	0	0	0	0	0	0	0	36	50	90	23	45	22	15	13	46	16	73	26	3	19	60	98	20	59	26	25	3	7	4	0	0	3	0	3
IL6R	12	12	11	10	17	9	26	9	15	14	9	14	8	14	21	11	14	6	14	11	13	1941	2715	3049	2095	6250	3655	2998	2307	5165	3192	4171	3532	2552	5088	6867	5690	3205	4793	6100	3231	238	187	228	54	45	552	714	57
IL9R	19	14	14	8	8	5	16	5	12	10	3	5	11	4	10	8	7	10	8	9	18	21	24	46	21	22	48	13	2	41	45	24	35	1	15	49	37	4	71	9	40	3	12	16	19	1	8	11	3
INSR	0	0	1	1	0	0	0	1	0	0	1	0	0	0	1	0	0	0	0	0	2	1101	5907	4605	2627	7782	3972	5546	2954	8172	8789	5827	3012	3351	6248	9399	8266	4547	5298	7722	6824	1470	1640	1687	295	1415	1374	4010	3070
KDR	0	0	1	0	0	0	0	0	0	1	0	0	0	0	0	0	0	0	0	0	0	395	1366	721	350	1043	631	803	414	940	577	850	957	944	630	1097	728	708	490	524	611	865	459	236	8	103	242	451	353
LEPR	5550	6865	7949	5718	10298	8589	9133	4874	6814	10627	7158	4263	9890	9794	7424	7471	5631	7031	6245	8142	8540	475	1169	471	390	796	192	729	204	813	675	588	697	916	497	757	355	1151	447	778	327	162	45	77	2	24	90	117	101
LGR4	45	60	75	61	71	40	33	95	58	54	55	41	54	48	58	51	51	57	79	58	43	5799	8681	8248	6183	11160	6142	5354	5056	11253	9600	7541	8154	2223	8204	14356	8920	5598	7044	8452	7599	1223	863	2681	90	233	1566	6762	3498
LGR5	12	17	13	22	11	13	16	17	13	19	16	17	21	9	16	9	16	11	20	21	19	291	1330	333	275	648	370	518	291	1066	549	521	487	79	358	1302	791	493	395	712	341	7015	1564	60	239	1436	144	767	673
LGR6	0	0	0	0	0	0	0	0	0	0	0	0	0	0	0	0	0	0	0	0	0	159	284	277	293	408	196	405	157	535	379	290	162	65	261	552	607	251	567	226	257	783	66	252	154	1968	559	4228	1226
LHCGR	2	0	1	0	2	3	0	3	0	1	1	3	2	0	2	0	2	2	2	2	2	0	0	2	0	0	1	1	0	0	0	0	0	8	1	1	0	0	0	2	0	1	0	0	0	0	0	0	0
LIFR	0	3	1	0	5	4	0	0	1	3	6	3	4	0	1	2	4	3	1	1	1	415	1456	1214	421	1419	649	2613	725	1796	1323	1124	993	2429	1250	1646	793	1916	1311	1109	1172	48	48	14	0	2	54	19	150
LTBR	0	0	0	0	0	0	0	0	0	0	0	0	0	0	0	0	0	0	0	0	0	5607	6087	5390	3913	8732	5184	6027	2901	7947	7327	7077	7856	5035	5354	7128	8152	3982	6266	8732	5795	4310	6073	3672	1524	2997	4201	5731	5819
MC1R	0	0	1	0	0	0	1	0	0	0	0	0	0	0	0	0	0	0	0	0	0	31	120	132	33	49	54	122	34	72	44	66	73	61	70	73	80	61	46	126	129	41	97	37	55	176	41	354	66
MC2R	3516	3321	4488	4885	4108	2438	3549	1888	3170	4425	3792	1999	4322	3624	3713	3573	3087	4182	3174	3305	5441	0	0	0	0	0	0	0	0	0	0	0	0	0	0	0	0	0	0	1	0	0	1	0	0	2	0	2	0
MC3R	18	33	22	6	151	69	14	560	15	37	52	46	121	62	12	69	18	469	15	187	12	0	0	0	0	0	0	0	0	0	0	0	0	0	0	1	0	0	0	0	0	1	0	0	0	0	0	0	0
MC4R	0	0	0	0	0	0	0	0	0	0	0	0	0	0	0	0	0	0	0	0	0	7	0	0	1	2	0	1	3	4	3	1	1	1	2	1	3	1	6	1	0	1	3	0	0	0	1	0	0
MCHR1	1	1	0	1	2	0	0	0	0	1	2	2	1	0	1	1	0	0	0	3	1	3	8	3	7	11	5	31	5	11	4	4	19	16	4	9	7	8	13	13	6	6	3	5	1	7	10	5	22
MCHR2	0	0	0	0	0	0	0	0	0	0	0	0	0	0	0	0	0	0	0	0	0	2	3	0	3	1	1	40	1	9	8	0	0	5	3	4	5	5	5	5	0	0	0	0	0	0	0	0	0
MET	0	0	0	0	0	0	0	0	0	0	0	0	0	0	0	0	0	1	1	0	0	1480	3020	1886	1255	3924	1509	1856	1263	2975	2291	2725	2401	544	1446	3259	2560	1393	1826	2607	2330	4726	4394	6871	485	2261	4633	8174	8728
MLNR	574	657	380	441	292	373	460	471	422	411	742	375	627	191	628	312	426	680	356	1005	492	1	1	1	0	1	0	0	1	0	0	1	2	4	0	2	1	0	0	3	2	0	0	0	0	0	0	0	0
MPL	2	0	1	3	1	0	0	1	1	2	0	0	0	0	1	0	1	0	0	0	3	7	11	14	5	17	14	21	4	14	15	16	12	28	9	25	7	12	12	12	17	9	4	8	5	5	8	23	2
MTNR1A	1872	2031	1860	1882	1709	1999	2306	1983	2061	2156	1028	1385	2616	2221	2164	1560	2101	1208	2378	1929	1958	11	50	34	44	50	57	63	23	79	19	59	66	3	9	45	44	14	61	3	59	2	2	12	0	1	8	1	0
MTNR1B	1	0	0	0	0	0	0	0	0	0	0	0	0	0	0	0	0	0	0	0	0	0	0	0	0	0	0	0	0	0	0	0	0	0	0	0	0	0	1	0	0	0	0	0	0	0	0	0	0
NGFR	84	79	128	108	190	65	86	114	58	93	75	67	101	112	54	140	65	195	123	51	79	180	968	275	118	442	220	1467	107	616	405	286	540	975	289	442	303	467	882	683	200	38	42	22	20	31	118	17	7
NMBR	0	1	0	2	0	0	1	0	0	1	0	0	0	1	0	0	0	1	0	1	0	2	1	2	0	3	0	2	1	1	2	0	1	8	2	3	0	1	2	0	1	0	0	0	0	0	0	1	0
NPR1	1	2	2	1	2	0	1	0	0	1	0	0	2	0	1	1	2	0	3	0	0	249	1291	332	224	667	193	1423	132	890	772	557	834	1058	462	396	262	1149	474	1038	468	64	173	50	19	61	129	63	82
NPR3	0	0	0	0	0	0	0	0	0	0	0	0	0	0	0	0	0	0	0	0	0	52	148	52	21	159	46	244	80	144	332	68	140	2545	82	82	57	809	43	239	94	9	35	1	2	50	132	958	23
NR0B1	0	0	0	0	0	0	0	0	0	0	0	0	0	0	0	0	0	0	0	0	0	0	0	0	1	0	2	8	0	1	1	3	3	2	2	0	0	7	0	2	1	0	0	0	0	0	0	0	0
NR0B2	0	0	0	0	1	0	0	0	0	0	0	0	0	0	0	0	0	0	0	0	0	26	27	26	51	21	30	21	5	32	43	39	36	1	9	40	31	14	18	3820	44	246	62	11	33	114	15	110	100
NR1D1	0	0	0	0	0	0	0	0	0	0	0	0	0	0	0	0	0	0	0	0	0	155	478	407	232	1502	553	528	363	1237	919	605	1219	2994	1137	622	643	471	447	1553	244	467	1601	255	289	562	447	3367	1435
NR1D2	0	0	0	0	0	0	0	0	0	0	0	0	0	0	0	0	0	0	0	0	0	1299	1295	2009	923	2108	1113	803	835	2966	2553	1529	1701	3581	2572	2244	2018	1453	1500	2507	677	1482	484	322	34	190	387	2911	1183
NR1H2	324	598	295	229	145	259	403	120	384	576	177	169	432	354	317	251	379	192	190	329	356	3408	4471	4313	3634	5433	3624	4535	1759	6917	6049	4355	5017	4289	3282	6484	5861	3693	4140	6656	5040	1282	2628	1625	844	3643	2148	4632	3392
NR1H3	778	1633	1162	884	1513	1532	1566	1229	1255	1835	792	638	1626	1433	1058	876	1543	831	1124	835	1309	2556	1993	1782	1659	2980	1965	1874	977	3892	2340	2222	1541	599	2022	3573	2724	1319	1867	4836	1540	718	1883	311	399	694	505	3261	712
NR1H4	4498	2065	2038	2723	7612	2841	3059	4062	1298	2383	8491	6846	4893	3054	3327	7617	2745	6509	3318	2832	3791	1975	729	432	59	1643	236	1085	936	1189	214	576	288	64	1036	1080	1897	672	800	9716	151	15	3	36	4	13	128	263	209
NR1I2	120	68	110	63	286	73	65	213	16	104	156	186	105	80	64	166	97	135	87	115	131	1176	1753	3324	2183	3655	1956	2640	1760	4314	3049	2797	2489	164	3015	3783	3344	1991	2524	7299	3418	1892	2310	215	234	1274	262	4991	1329
NR1I3	0	0	0	0	0	0	0	0	1	0	2	0	1	1	0	0	0	0	0	0	0	22	36	33	14	23	22	33	10	31	23	22	26	39	12	30	45	20	23	209	31	14	11	5	0	17	2	10	3
NR2C1	279	271	407	298	392	246	298	475	265	383	285	274	408	322	281	278	273	365	528	212	344	786	882	985	561	895	722	767	413	846	580	779	748	573	485	1030	790	582	546	505	697	357	556	338	32	147	434	971	512
NR2C2	0	0	0	0	0	0	0	0	0	0	0	0	0	0	0	0	0	0	0	0	0	910	2628	2843	1207	2623	1810	2563	1074	2932	2174	2577	1876	3000	2065	3707	2718	1828	1944	3368	2651	979	1161	509	123	236	504	2206	738
NR2E1	718	1156	1060	743	1472	1163	921	738	929	1258	760	515	1307	1007	926	939	962	1023	898	948	1079	0	0	0	0	0	0	0	0	0	0	0	0	0	0	1	0	0	0	1	0	0	0	0	0	0	0	6	0
NR2E3	2	2	0	2	3	3	2	0	4	5	5	1	1	1	1	4	2	3	1	6	1	2	13	15	2	5	4	11	7	14	7	6	4	7	5	6	11	9	7	15	24	2	3	0	0	0	2	11	6
NR2F1	0	0	0	0	0	0	0	0	0	0	0	0	0	0	0	0	0	0	0	0	0	146	837	359	244	417	275	430	143	536	493	460	520	604	202	485	508	488	357	265	451	167	300	199	257	317	349	1308	143
NR2F2	0	0	1	0	1	1	1	3	0	4	0	5	1	1	1	1	0	0	2	1	0	1164	4843	2234	1815	3134	1484	2862	1084	3411	3248	2836	2477	9564	1587	3850	2394	3950	2278	2840	2642	1568	1090	933	316	832	1364	2414	910
NR2F6	2	1	1	3	4	2	2	1	3	2	4	1	4	7	0	1	1	3	0	6	2	2418	5400	4849	3689	8191	5151	4983	2381	8783	9191	6438	4933	1562	4875	7339	6698	2896	6410	5183	5105	818	3296	2755	1635	2426	2162	2990	2581
NR3C1	3	4	3	5	6	0	2	8	1	1	4	2	5	2	2	7	6	13	3	3	6	1361	2073	2106	1547	1594	1481	1559	698	3491	2399	1574	1945	3572	1754	2557	1893	2758	1682	3855	2048	262	245	142	39	70	268	920	206
NR3C2	0	0	0	0	0	0	0	0	0	0	0	0	0	0	0	0	0	0	0	0	0	2274	6309	6900	3804	8006	5923	4567	3298	9316	8898	6298	6743	2078	6781	11557	6379	4951	6044	7346	7036	529	480	607	12	101	473	1440	963
NR4A1	0	0	0	0	0	0	0	0	0	0	0	0	0	0	0	0	0	0	0	0	0	2182	7657	5749	670	791	617	14955	3826	3146	5759	569	4927	680	3411	1183	5814	15646	1285	3806	32297	464	5932	442	1027	3601	2601	3427	1261
NR4A2	2646	8024	2678	1483	3970	4282	6133	3014	6237	9284	3855	1864	5992	4524	5143	3561	9114	1600	3115	3720	3538	305	823	1068	145	223	170	1532	899	483	912	147	1711	119	426	280	825	3100	250	643	6010	303	385	428	84	90	443	748	227
NR4A3	0	0	0	0	0	0	0	0	0	0	0	0	0	0	0	0	0	0	1	0	0	1122	312	552	38	41	20	1241	884	380	324	39	245	52	463	38	1023	4431	93	953	2392	24	189	46	6	9	155	97	93
NR5A1	582	482	604	622	389	639	758	742	476	846	245	418	569	334	422	351	525	651	727	219	725	0	2	0	1	1	2	5	0	3	0	0	0	1	1	0	1	2	0	1	0	0	0	3	4	0	1	0	0
NR5A2	0	0	0	0	0	0	0	0	0	0	0	0	0	0	1	0	0	0	0	0	0	1484	3555	2660	2039	3560	1927	2488	1705	3930	3260	2625	2646	296	2175	4642	3087	1719	2120	4360	3235	396	161	250	37	38	288	1628	515
NR6A1	2	1	1	0	0	1	1	0	0	1	0	0	1	0	2	2	0	3	0	3	2	123	451	517	266	562	357	545	263	538	459	469	178	239	544	671	527	267	328	588	519	174	402	122	21	129	71	408	278
NRP1	367	77	223	77	153	161	429	11	246	436	20	110	240	133	353	177	123	35	27	537	299	1226	5251	2571	1137	3316	1676	2415	974	3356	2157	2337	3030	4140	1774	3654	2158	2627	2429	2632	1800	798	767	705	40	190	726	1761	888
NRP2	0	0	0	0	0	0	0	0	0	0	0	0	0	0	0	0	0	0	0	0	0	557	1753	714	328	1634	614	2863	698	1227	3111	1017	3211	18630	881	1159	846	6390	898	2633	1597	454	1190	269	16	295	684	1563	778
OGFR	0	0	0	0	0	0	0	0	0	0	0	0	0	0	0	0	0	0	0	0	0	1040	2220	1813	1507	2335	3201	2673	846	3971	2909	2626	2297	1927	1519	2854	2542	1428	3676	3354	1958	1544	3028	2061	976	1766	1177	1657	1869
OPRD1	590	670	981	729	654	586	913	763	624	893	648	581	896	717	695	679	631	757	909	463	812	6	12	2	1	7	6	11	7	2	10	6	21	81	4	10	12	19	5	27	8	26	4	0	2	1	7	9	1
OPRK1	2904	3702	4072	2606	5409	4409	4552	3911	3986	5995	2875	2035	5431	5346	3769	3154	3030	2948	3645	3382	4129	0	2	0	0	0	0	1	2	0	1	3	0	11	1	0	0	7	0	8	0	3	0	0	0	0	0	0	0
OPRL1	141	108	95	148	214	80	131	166	80	121	130	207	122	81	107	106	93	204	143	136	185	42	84	86	42	70	127	57	30	148	58	123	76	81	36	111	103	70	75	48	51	5	21	8	6	5	16	203	8
OPRM1	3362	4758	3058	2407	4092	4517	5987	1181	4991	5758	1672	1247	5701	7597	4323	3449	2653	1775	3692	3366	4723	1	4	0	0	0	0	13	0	0	1	0	1	1	1	3	0	1	1	1	1	0	0	0	0	0	0	0	0
OSMR	0	0	0	0	0	0	0	0	0	0	0	0	0	0	0	0	0	0	0	0	0	355	2853	646	310	726	492	1135	425	1037	637	756	1422	1538	456	729	866	841	801	531	558	305	343	216	47	106	465	402	393
OXTR	17	22	11	41	32	9	20	25	17	36	21	34	15	6	31	29	7	68	25	21	36	5	38	16	8	13	6	46	9	18	21	20	12	15	12	25	13	14	12	10	11	60	30	10	0	34	14	83	63
PGR	1	0	0	1	2	0	0	3	0	0	1	0	0	0	0	0	2	5	0	0	0	75	208	93	55	142	62	276	75	121	322	88	136	1275	102	177	122	689	93	236	116	8	26	1	5	1	18	26	5
PGRMC2	5281	7835	7728	6052	7086	7071	9290	4474	6045	10402	5861	4239	10145	8040	7643	6786	6549	5453	6020	4791	9247	3186	5322	3397	3847	6628	3752	3706	2829	6494	4797	4093	4432	3057	2851	5807	4534	4487	3476	13720	3711	2460	2129	1531	398	536	1259	4315	3398
PPARA	3	8	5	9	6	0	4	1	3	3	0	1	7	4	7	2	4	2	3	0	3	2330	5187	4049	2231	5857	3602	3617	2136	5512	4377	4240	2887	2300	4801	6831	4943	2491	3497	8141	4632	2050	1666	714	100	372	833	4157	1917
PPARD	37	10	22	10	13	12	9	6	15	31	21	11	20	33	9	19	26	13	14	31	12	2916	3472	6694	3351	11490	3605	4024	4186	7099	6833	5946	4107	2563	8510	10511	6434	4011	5224	3952	5758	1250	1896	2025	370	1147	2733	4227	4169
PRLHR	0	1	0	0	0	0	0	0	0	0	0	0	0	0	0	0	0	0	0	0	0	0	0	0	0	0	0	1	0	0	0	0	0	0	0	1	0	0	1	1	0	0	0	0	4	0	0	0	0
PRLR	0	0	0	0	0	0	0	1	0	0	0	0	0	0	0	0	0	0	0	0	0	502	1210	1750	1001	1435	645	1265	446	723	1062	755	815	109	1040	1045	1386	726	615	2741	1211	539	798	32	52	111	88	765	525
PTGER1	3	0	2	1	1	0	1	0	1	4	2	2	2	1	0	1	3	2	1	0	3	3	91	28	35	14	12	31	8	33	24	31	30	13	12	24	25	6	36	53	22	3	19	5	42	25	20	2	6
PTGER2	5908	7673	7570	6655	10449	8235	9935	6355	6253	10767	6514	4937	10338	8782	7363	6377	6777	7813	6853	5813	9371	984	628	715	383	1019	522	355	419	757	483	554	619	138	347	818	899	327	753	285	380	44	77	96	14	23	270	803	41
PTGER3	0	0	0	0	0	0	0	0	0	0	0	0	0	0	0	0	0	0	0	0	0	229	331	145	112	320	51	624	159	231	287	148	294	1532	163	264	134	770	151	393	186	32	83	9	35	38	97	116	20
PTGER4	2	0	0	0	0	0	1	0	1	0	0	0	1	2	0	1	0	0	0	1	0	2394	4185	3964	1859	2932	2344	2629	2154	5877	5884	2612	3842	1348	2830	4542	8019	3762	3835	3406	3658	467	639	482	217	439	536	662	306
PTGFR	0	0	0	0	0	0	0	0	0	0	0	0	0	0	0	0	0	0	0	0	0	69	394	185	102	147	86	172	52	252	123	189	261	237	90	160	125	187	150	95	89	40	25	15	2	6	22	11	22
PTH1R	1829	3931	2787	2372	3140	3253	3530	3444	2390	4089	1915	1660	3999	3311	2784	2218	3332	2414	2969	2272	3228	52	176	93	43	92	51	171	41	118	82	88	67	137	60	95	66	110	74	75	57	2	6	7	0	10	8	6	22
PTH2R	62	645	356	165	293	191	287	37	199	579	170	66	246	408	285	165	610	141	113	28	197	10	1	8	3	9	2	2	3	1	3	4	7	2	5	0	2	3	4	6	3	1	0	2	0	0	0	3	1
RARA	9	3	2	4	7	7	11	7	6	10	5	4	4	6	7	4	12	6	4	5	8	1192	3037	2095	1670	3320	2236	2421	1153	4006	3365	2765	2439	1600	1714	3547	2869	1832	2560	6384	2478	702	2143	471	286	890	841	2533	1221
RARB	578	607	691	742	872	636	946	570	515	875	559	447	1052	826	624	721	460	650	718	528	928	98	227	97	50	273	88	252	118	209	96	157	117	560	120	217	92	217	110	276	80	63	74	26	8	18	77	50	20
RARG	0	0	0	0	0	0	0	0	0	0	0	0	0	0	0	0	0	0	0	0	0	318	1497	875	1100	982	624	1038	313	1337	1066	1307	864	1422	486	1522	1168	936	659	331	1145	752	1571	352	111	939	1613	4934	1722
RORA	2005	3151	8689	2153	2254	4192	2939	3776	1892	3939	962	1683	3460	3363	2018	2492	2507	2396	2753	1802	2115	294	400	511	263	536	493	911	223	667	413	495	430	1084	363	540	360	754	648	517	362	152	123	143	8	19	88	171	103
RORB	1	1	3	2	0	1	1	0	2	5	1	0	0	2	1	0	1	0	0	1	1	3	42	44	14	22	6	68	5	22	19	19	22	55	12	24	24	20	14	27	26	1	1	0	0	0	1	1	3
RORC	0	0	0	0	0	0	0	0	0	0	0	0	0	0	0	0	0	1	0	0	0	1056	1778	2124	1894	1822	1255	1261	605	2345	1930	2149	1143	118	580	2136	2098	813	991	3995	2552	1218	338	412	194	297	489	1040	1602
RXFP1	0	0	0	0	0	0	0	0	0	0	0	0	0	0	0	0	0	0	0	0	0	5	8	38	20	32	12	33	8	47	9	25	19	9	17	32	25	42	16	23	22	2	1	3	0	0	2	0	12
RXFP2	0	0	0	1	0	0	0	0	0	0	0	0	0	0	0	0	0	0	0	0	0	0	0	0	0	0	0	0	0	0	0	0	0	0	1	0	0	1	0	0	0	0	0	0	0	0	0	0	0
RXRA	85	44	70	49	61	152	99	141	81	163	46	73	129	85	89	52	95	73	93	36	104	3349	7253	6857	4719	11407	6414	6787	3001	13982	11892	7555	5620	4284	7739	14103	9760	5676	8232	11363	7957	2417	2687	1865	790	974	2047	3687	2796
RXRB	1126	459	806	592	2167	448	489	2668	310	564	2627	1945	1046	449	526	1329	700	3350	1317	388	624	2357	2645	2867	1931	2946	2215	2758	969	3370	2714	2740	2194	2418	1569	3772	3122	2008	2277	2667	2768	1797	1607	897	362	1041	1053	2895	1037
RXRG	0	0	0	0	0	0	0	1	0	0	0	0	0	0	0	0	0	0	0	0	0	63	70	94	68	108	61	186	17	99	92	73	64	202	40	108	37	120	133	118	53	4	1	1	0	2	2	0	0
S1PR1	72	93	56	86	113	101	72	104	56	86	46	84	98	74	64	63	55	83	60	60	79	921	2102	743	462	728	512	1579	388	2641	1149	943	2165	1421	778	812	996	1652	891	1305	831	309	254	236	75	87	375	304	245
S1PR2	0	1	0	2	1	0	0	0	1	0	1	0	0	3	0	0	1	0	0	0	0	159	698	239	200	270	433	771	105	518	300	374	504	307	179	383	517	362	408	240	327	93	329	216	54	132	194	399	300
SCTR	244	608	390	393	263	321	473	374	427	503	284	279	570	520	421	287	700	284	282	80	674	9	43	98	21	36	30	91	19	46	39	52	11	7	90	65	28	22	39	125	38	1	4	0	0	0	2	29	3
SDC1	494	535	853	594	780	530	889	370	659	685	335	289	571	786	446	480	363	532	723	536	723	10692	18421	13853	10868	20178	15024	12459	8177	19307	24322	16345	14108	1463	10864	25930	20283	7281	16937	14503	12547	11709	17153	5569	2962	7968	7580	36758	26609
SDC2	0	0	0	0	0	0	0	0	0	0	0	0	0	0	0	0	0	0	0	0	0	2381	2813	1524	1312	2099	883	3281	706	1850	2501	1452	2616	7237	1042	1869	1327	4718	1642	3133	1559	797	823	324	112	244	727	1340	917
SDC3	0	0	0	0	0	0	0	0	0	0	0	0	0	0	0	0	0	0	0	0	0	1681	3236	2333	1279	3283	3334	5067	1108	3954	4881	2853	4561	22276	1720	3619	2846	6174	4658	3662	2667	3447	1251	652	313	772	1775	7714	2370
SDC4	0	0	0	0	0	0	0	1	0	0	0	0	0	0	0	0	0	0	0	0	0	6913	8775	8019	8731	13109	6758	8285	5475	12772	13544	8554	7277	7843	7748	12428	11564	8087	7784	11070	10591	8115	12022	4287	1616	4409	9264	15424	7413
SORT1	0	0	0	0	0	0	0	0	0	0	0	0	0	0	0	0	0	0	0	0	0	3949	11524	7545	5019	13263	7575	8963	4545	14329	11559	9341	7499	6297	8353	13770	9410	6665	9125	16466	7724	6910	2986	3393	411	1921	2854	11875	3709
SSTR1	4897	6798	6224	7185	8575	7260	10023	6051	6783	10100	4538	5637	10621	7586	7112	5211	5120	7567	6596	5169	9930	587	1248	973	507	1027	697	834	394	1155	1094	950	672	235	588	1437	1171	504	737	2193	1158	258	480	68	27	46	195	557	215
SSTR2	0	0	0	0	0	0	0	0	0	1	0	0	0	0	0	0	0	0	0	0	1	128	176	336	765	650	89	189	74	316	135	123	440	47	191	721	359	202	196	221	525	9	22	12	10	6	31	33	21
SSTR5	12	27	23	23	18	20	16	18	14	23	6	14	27	18	18	27	21	21	15	27	17	0	4	4	4	6	7	3	1	5	11	3	6	0	5	6	8	1	4	20	8	33	2	146	83	32	68	9	12
TACR1	0	0	0	0	0	0	0	0	0	0	0	0	0	0	0	0	0	0	0	0	0	8	334	22	22	73	2	130	16	150	82	51	207	460	64	37	21	137	32	82	69	9	4	4	0	3	3	10	8
TEK	1	1	0	0	0	0	0	1	0	0	0	0	0	0	0	0	0	0	0	0	0	357	987	537	357	789	321	642	270	1049	624	726	1078	960	445	808	526	978	636	673	562	257	181	87	23	39	126	127	98
TGFBR1	0	0	1	1	4	0	0	1	0	0	2	1	0	0	0	0	0	2	1	0	0	1460	2372	1632	1007	2212	1256	2061	1002	2361	2081	1803	1904	2945	1086	2629	1953	2506	1636	1983	1599	1565	1158	1121	62	286	1045	2357	2053
TGFBR2	0	0	0	0	0	0	0	0	0	0	0	0	0	0	0	1	0	0	0	0	0	4745	13045	6798	4118	8184	4858	9258	3316	11696	7725	7709	10594	12928	4975	9579	7253	10167	7321	9667	5782	5633	4225	913	345	1367	1573	10065	3730
TGFBR3	0	0	0	0	0	0	0	0	0	0	0	0	0	1	0	0	0	0	0	0	0	701	3455	1078	654	1582	454	3343	502	2013	1910	1030	1580	6930	1018	1669	1061	3208	1152	2603	1531	1932	113	356	33	41	326	1847	1377
THRA	383	493	671	571	538	322	602	524	543	740	512	290	885	522	580	523	489	498	458	561	837	2376	5181	3255	2693	6344	3207	6316	2213	7085	5512	5006	4498	8027	3372	6327	4707	5026	3513	7425	4720	3371	4885	679	573	1124	973	5514	2485
THRB	0	0	0	1	0	0	0	1	0	0	0	0	0	0	0	1	0	0	0	0	0	290	1069	1792	1301	647	427	1081	449	2959	2517	686	1311	3132	2553	1862	1225	2216	460	480	2774	190	76	136	15	20	36	503	65
TIE1	0	1	0	0	2	1	3	0	5	2	0	0	3	2	2	3	2	2	1	2	1	347	1767	680	451	893	431	1223	175	1277	1108	921	1348	1133	417	908	655	962	770	964	799	339	500	231	143	280	406	333	381
TNFRSF10C	666	549	882	656	1156	894	1260	708	829	1215	645	603	890	949	972	787	497	588	867	799	1108	46	49	28	28	55	26	22	20	44	34	24	80	23	27	64	56	107	32	182	28	169	222	40	14	63	40	29	349
TNFRSF10D	0	3	0	1	0	0	0	0	0	0	1	2	1	0	0	0	0	2	0	0	0	667	687	837	672	867	501	460	328	819	976	737	673	272	604	1471	848	884	382	1558	1470	1800	572	343	22	159	508	288	1035
TNFRSF11A	2125	2188	2617	2799	2817	1812	2505	2926	2152	2599	2258	1496	2484	2264	1986	2661	1577	2321	2955	1977	3288	2079	4511	4354	3000	3532	3188	4775	1876	3925	4326	4136	3143	467	2771	5344	5361	1920	4200	3751	4677	363	791	542	197	659	1234	3012	1653
TNFRSF12A	3440	6946	5089	4478	4074	4326	5043	3169	4708	6466	3253	2335	6347	5133	4933	3535	5089	3364	5112	3671	6237	1470	352	404	286	370	226	361	149	472	410	282	653	191	340	321	1155	354	389	2405	470	1258	3727	1826	576	526	3192	3122	3265
TNFRSF13B	0	0	0	0	0	0	0	0	0	0	0	0	0	0	0	0	0	0	0	0	0	155	52	243	104	162	394	132	121	652	372	441	247	9	239	245	378	127	217	43	252	4	23	5	7	3	7	2	1
TNFRSF13C	1	7	4	1	5	6	2	24	7	18	2	8	27	7	3	9	6	13	15	1	2	25	46	151	130	124	817	563	206	2284	63	726	389	23	375	263	662	342	217	94	374	38	47	44	7	17	49	48	50
TNFRSF14	0	0	0	0	1	0	0	0	0	0	0	0	0	0	0	0	0	0	0	0	0	3609	5321	6117	4037	4773	6136	6612	1855	6385	5805	4889	4820	1273	3170	6713	6173	2486	6265	7635	5904	2442	2987	1449	1407	1490	2097	6059	2745
TNFRSF17	0	0	0	0	1	0	0	0	0	0	0	0	0	1	0	0	0	0	0	0	0	1447	446	842	470	791	1225	162	630	1249	736	1009	675	21	460	1184	1044	231	1242	97	316	31	26	19	26	1	38	3	0
TNFRSF18	2	5	8	6	3	2	5	3	1	1	3	1	6	1	2	4	2	1	2	5	0	190	142	224	128	173	252	119	129	341	214	312	310	12	115	219	338	39	249	90	96	35	182	237	99	43	244	69	47
TNFRSF19	0	1	2	0	2	0	0	1	1	0	2	0	0	0	1	0	0	0	1	0	0	47	179	163	101	76	94	129	48	155	118	65	107	158	69	211	80	139	102	105	165	826	175	18	16	20	29	843	625
TNFRSF1A	0	0	1	0	0	0	0	0	0	0	0	0	0	0	0	0	1	0	0	0	0	7375	9736	8238	6430	12355	7962	8334	4891	15433	13062	8770	12935	7667	8413	12535	12623	7619	9965	17851	7804	3302	4595	3637	1624	2455	4323	6099	3863
TNFRSF1B	0	0	0	0	0	0	0	0	0	0	0	0	0	0	0	0	0	0	0	0	0	1770	3349	3119	2513	3233	4536	2779	1162	5490	4545	3277	4636	1526	2748	3824	3688	2503	6062	5873	2885	2906	3364	1040	586	507	1332	3009	4294
TNFRSF21	2	0	1	4	2	0	0	0	2	1	0	0	1	2	0	0	0	1	0	0	0	3866	4763	6699	4726	9028	5338	4420	3965	11152	8192	5659	6012	4574	10632	9107	10664	5783	7212	4399	6962	2910	5166	4994	448	1673	4639	8549	8176
TNFRSF25	0	0	0	0	0	0	0	0	0	0	0	0	0	0	0	0	0	0	0	0	0	155	1239	1197	1065	249	629	622	146	764	965	907	1996	65	414	345	739	366	406	358	1733	309	737	104	202	314	195	228	175
TNFRSF4	0	0	0	0	0	1	0	0	2	0	0	0	1	2	0	0	0	0	0	2	0	66	111	157	89	103	160	84	53	242	91	187	244	19	75	102	138	40	166	39	80	53	146	85	63	141	141	77	42
TNFRSF6B	0	0	0	0	0	0	0	0	0	0	0	0	0	0	0	0	0	0	0	0	0	0	0	0	0	0	0	0	0	0	0	0	0	0	0	0	0	0	0	0	0	0	0	0	0	0	0	0	0
TNFRSF8	1619	3171	1976	2135	2689	2493	2858	2270	2827	3548	1427	1351	3239	2854	2247	1751	2754	1709	2882	1809	2705	18	76	13	22	35	80	46	12	143	43	46	144	48	18	25	45	35	55	31	34	12	40	15	10	16	21	22	19
TNFRSF9	0	0	0	0	0	0	0	0	0	0	0	0	0	0	0	0	0	0	0	0	0	39	43	24	38	47	185	68	74	259	31	114	244	13	69	47	130	63	98	17	61	46	74	86	18	12	127	86	160
TRHR	0	0	0	0	0	0	0	0	0	0	0	0	0	0	0	0	0	0	0	0	0	0	0	2	0	0	0	2	0	1	2	0	0	1	0	0	0	0	1	0	0	0	0	0	1	0	0	0	0
TSHR	0	1	0	0	0	0	0	0	0	0	0	0	0	0	0	0	0	1	0	0	0	14	14	38	12	21	50	15	13	53	35	33	15	0	13	31	41	4	49	7	17	2	4	0	2	0	3	0	0
TUBB3	1528	871	1399	964	3168	1002	1335	737	834	1951	2444	1349	2001	1361	1342	1946	827	2607	747	1841	2693	18	53	16	11	25	18	168	9	77	38	31	79	139	28	48	23	54	49	67	29	53	51	27	59	87	63	59	206
VIPR1	0	0	0	0	0	0	0	0	0	0	0	0	0	0	0	0	0	0	0	0	0	3148	4926	8287	5390	7039	4980	3981	2919	9203	7921	6154	2955	592	5388	10071	6791	3692	4735	11143	7617	1475	647	325	402	751	752	2514	1040
VIPR2	3285	3901	3648	3046	5148	4302	5646	2427	3228	5243	3741	2145	5093	5127	3916	3911	3356	3729	2897	3418	4781	74	102	57	20	54	13	182	13	41	143	37	125	499	39	37	17	209	23	188	65	4	6	4	16	25	9	2	3
PTPN11	0	0	0	1	0	0	2	0	0	0	0	0	0	0	0	1	0	3	0	0	0	2433	5545	3563	2148	4857	3481	5122	2141	6152	5178	3990	5369	6625	3152	5612	4424	4654	3768	5178	4077	4725	3756	2356	165	733	1963	3258	3738
ICAM2	1	0	1	1	0	0	0	0	0	0	0	0	0	0	0	0	0	1	0	0	0	412	520	400	356	447	462	525	188	947	482	603	763	269	245	410	571	489	506	345	367	274	357	130	34	148	261	296	128
ITGAL	0	0	0	0	0	0	0	0	1	0	0	0	0	0	0	0	0	0	0	0	0	422	673	1147	774	1097	2929	1281	412	3109	1121	2129	1473	215	919	1519	1699	1045	3965	632	1496	147	227	164	126	77	211	244	80
ITGB2	0	0	0	0	0	0	0	0	0	0	0	0	0	0	0	0	0	0	0	0	0	2450	3439	3381	2067	2804	7053	2003	882	7579	2916	5121	6179	1634	2165	5558	4196	2987	7944	2056	2525	552	989	1193	731	895	1598	1378	765
PAK1	0	0	0	0	0	0	0	0	0	0	0	0	0	0	0	0	0	0	0	0	0	3424	6006	6030	4610	8412	5928	5101	3297	8792	7165	6542	5962	3011	4794	9104	7056	4475	5620	6075	5797	3263	4555	1856	338	1256	1872	9011	4773
NCR2	6	9	5	6	10	1	7	2	7	4	14	5	2	6	7	9	1	6	8	5	7	2	12	7	27	17	7	16	0	15	14	18	6	0	3	6	18	4	6	22	23	1	0	0	0	0	0	0	0
TYROBP	138	98	119	206	65	135	200	169	113	211	71	104	205	110	115	53	92	264	239	27	117	3893	1512	2041	1837	2017	2675	941	509	2195	1914	2079	2990	742	946	3217	2501	1125	2787	1671	1133	321	536	687	555	552	998	486	610
LCK	0	0	0	0	0	0	0	0	0	0	0	0	1	0	0	0	0	1	0	0	0	508	307	429	648	558	1659	612	159	2072	636	968	860	71	271	718	729	712	2018	458	553	280	237	548	153	126	415	328	123
FCGR3A	3	2	2	6	1	2	1	0	11	5	1	0	11	12	2	3	3	1	2	8	6	708	1330	495	702	593	1373	687	234	518	334	500	1092	625	248	661	661	323	1729	196	154	414	464	944	41	142	743	1172	646
FCGR3B	0	0	1	0	0	0	0	0	0	0	0	0	1	1	0	0	0	0	0	0	0	332	39	27	6	202	51	7	85	74	31	41	129	8	73	12	193	771	62	83	23	11	18	110	4	3	184	14	115
NCR1	0	0	0	0	0	0	0	0	0	0	0	0	0	0	0	0	0	0	0	0	0	14	13	14	20	18	18	18	4	21	16	22	11	2	10	35	15	6	19	24	15	0	6	0	0	1	2	6	3
NCR3	0	0	0	0	0	0	0	0	0	0	0	0	0	0	0	0	0	0	0	0	0	21	15	13	58	26	78	65	7	249	13	83	44	10	29	45	85	53	37	25	33	9	14	8	9	7	11	4	0
CD247	0	0	0	0	0	0	0	0	0	0	0	0	0	0	0	0	0	0	0	0	0	218	257	342	637	558	750	357	139	911	400	668	444	56	196	509	421	408	790	644	379	100	116	69	60	29	110	121	53
ZAP70	0	0	0	0	0	0	0	0	0	1	1	0	0	0	0	0	0	0	0	0	0	208	157	335	253	238	898	381	82	798	237	511	355	58	214	450	314	367	959	231	394	196	161	41	128	87	82	101	29
LCP2	38	29	66	59	162	30	51	131	29	49	158	62	54	39	25	45	45	173	82	25	73	822	832	1074	872	1341	2124	758	469	2086	742	1396	1691	334	692	1517	1401	928	2452	855	785	409	334	324	88	60	525	397	217
LAT	0	0	0	0	0	0	0	0	0	0	0	0	0	0	0	0	0	0	0	0	0	12	17	61	18	25	20	43	8	19	4	45	19	4	8	14	17	20	43	16	24	9	23	2	12	5	8	22	2
PLCG1	3	1	3	3	2	2	3	2	2	3	0	1	2	2	3	1	0	1	4	0	2	818	2739	2901	1317	2267	1981	2813	895	2882	2531	2444	2213	2872	1647	2830	1942	2027	2513	2641	2443	2683	3170	547	560	1603	789	4082	829
SH3BP2	11	25	0	2	7	2	1	12	0	0	0	1	3	9	1	66	0	76	0	1	8	1514	3272	4051	2420	4307	3224	3435	1505	4899	3163	3231	3292	807	3402	4497	3173	1810	3028	3713	3557	1400	2920	1105	356	973	1398	3839	1378
FYN	0	0	0	0	0	0	0	0	0	0	0	0	0	0	0	0	0	0	0	0	0	825	1501	896	806	1342	1559	1905	349	2353	1233	1335	1458	2317	738	1415	985	1900	2266	1816	904	334	460	551	116	292	517	426	327
SHC2	0	0	1	2	3	0	0	1	1	1	3	2	3	1	2	2	0	6	1	1	2	158	596	278	128	253	144	691	90	505	430	211	582	1067	201	257	159	506	175	443	273	1053	153	24	114	457	128	174	1000
SHC4	369	2188	515	519	1530	950	613	2391	1778	897	499	435	2181	1069	882	571	1772	493	921	318	986	30	57	36	9	62	15	79	17	25	46	26	62	214	38	43	7	129	59	77	29	12	9	14	2	6	15	26	8
SHC3	2	0	3	6	7	2	6	11	1	4	1	5	4	2	4	0	3	6	4	4	2	60	332	65	70	102	50	303	27	202	164	98	149	257	149	134	62	262	94	168	103	166	80	30	18	13	39	69	32
SHC1	0	0	0	0	0	0	0	0	0	0	0	0	0	0	0	0	0	0	0	0	0	2144	6536	5300	3543	6984	4618	5474	2490	7837	6390	5589	7258	4339	4932	7355	7258	4486	5194	6785	5750	3614	3597	1749	595	2251	2580	6184	3904
GRB2	0	0	0	0	0	0	0	0	1	1	0	0	2	0	1	1	0	0	0	1	1	6164	8561	7820	6198	11616	9574	8474	4530	14530	10815	9068	10749	9433	8083	12621	10969	7869	9136	11968	8968	3870	7427	3150	862	2045	3275	13837	6116
SOS1	0	0	0	0	0	0	0	0	0	0	0	0	0	0	0	0	0	0	0	0	0	1313	4062	2827	1563	3532	2494	3104	1694	3999	2847	2845	2265	2726	2595	4207	3231	2342	2716	4461	2778	1299	1065	730	81	225	597	2977	1555
SOS2	1	5	1	1	5	1	4	4	3	4	1	2	13	6	3	4	2	0	2	2	11	2167	3796	3046	2109	4777	2910	2894	2613	5582	3779	3409	2267	2000	3769	5621	4373	2861	2575	5745	2885	1924	847	435	50	207	503	2526	1078
ARAF	0	1	0	0	1	0	1	4	1	0	0	0	1	0	1	1	0	0	0	0	0	3251	6089	5206	4183	6249	4679	5859	2047	7912	6477	5228	5336	2965	3458	7813	6773	3520	5237	5634	6339	3271	3436	1765	1429	2351	2031	4242	2204
BRAF	7	0	1	1	12	4	10	6	8	7	3	1	5	2	4	6	3	3	8	2	3	442	1214	935	516	1126	920	1151	562	1418	924	996	821	1212	935	1446	1070	889	770	1095	812	872	866	345	27	177	273	1197	847
RAF1	1634	2335	1426	2258	2160	2049	1966	2311	2808	2940	1442	1479	3241	2732	2128	2134	1524	1884	3653	1695	3314	4194	5909	5495	3724	6622	4915	5142	2562	7244	5991	5327	5481	4860	4171	8023	6083	4185	5062	8739	5023	2400	3102	1653	264	1499	1911	6089	2775
HCST	2	2	3	4	4	1	3	3	0	2	4	2	3	2	3	4	1	6	3	2	4	237	110	119	212	145	326	159	41	319	158	203	219	104	101	232	227	135	393	137	99	20	42	55	52	32	94	23	80
CD48	0	2	3	0	1	2	0	1	3	1	0	1	2	0	1	0	0	1	1	2	1	2891	427	1159	1577	1107	2573	664	517	3584	948	1860	1649	143	774	1501	1385	1378	1815	640	787	200	122	105	50	52	259	105	56
CD244	0	0	0	0	0	0	0	0	0	0	0	0	0	0	0	0	0	0	0	0	0	146	72	90	134	133	213	64	30	175	110	135	94	22	37	197	71	56	446	96	77	20	17	24	9	5	37	20	9
PRKCA	0	0	0	0	0	0	0	0	0	0	0	0	0	0	0	0	0	0	0	0	0	1680	3128	2752	1369	2531	2060	3449	1687	2678	3181	2655	2044	6626	1602	2915	3248	3001	2340	5329	3361	1025	1347	349	123	235	659	7995	719
PRKCG	0	0	0	0	0	0	0	0	0	0	0	0	0	0	0	0	0	0	0	0	0	4	3	26	2	5	19	16	4	13	18	9	9	1	1	11	24	10	14	8	16	3	12	9	0	5	103	0	121
SH2D1B	1	0	2	1	0	0	1	0	1	0	0	0	0	1	0	2	1	1	0	1	0	94	92	47	114	81	44	55	39	40	47	88	122	8	23	56	51	40	43	121	47	3	4	34	2	0	12	7	7
SH2D1A	54	52	104	81	158	39	62	61	32	79	132	60	75	82	76	41	36	91	20	67	74	139	32	57	129	96	279	84	39	252	57	153	108	42	67	79	106	131	141	55	56	40	23	30	8	1	44	26	1
FAS	5	6	20	7	4	16	26	11	13	37	4	5	28	7	7	10	19	3	12	15	38	1606	1664	2033	2123	1582	1805	1663	895	2048	2046	1291	1967	612	1096	1817	1916	1484	1704	878	2643	169	415	1031	51	64	532	848	851
GZMB	0	0	0	0	0	0	0	0	0	0	0	0	0	0	0	0	0	0	0	0	0	163	100	71	71	62	230	139	59	219	108	53	207	19	120	128	104	29	464	87	53	752	3568	290	30	28	285	146	48
PRF1	0	0	0	0	0	0	0	0	0	0	0	0	0	0	0	0	0	0	0	0	0	424	405	278	421	474	832	491	148	902	492	444	467	116	290	546	390	285	1451	374	252	315	289	221	133	35	242	239	68
CASP3	0	0	0	0	1	1	0	0	0	0	1	1	1	1	0	0	0	1	0	0	0	3975	3054	3145	3175	4251	4188	2518	2023	4006	3625	3054	3544	868	2672	5029	3501	1946	4092	3745	2750	2024	1664	1260	248	369	1051	3508	2011
BID	15	14	22	29	38	10	21	7	26	20	15	12	22	17	15	33	11	15	22	18	22	2369	1500	1265	1506	1664	1570	1374	618	1936	1481	1449	2205	483	657	1715	1637	889	1366	1096	1205	2551	1792	1072	779	743	1385	1628	2730
CD3D	311	145	262	243	351	121	312	212	158	355	179	186	285	239	198	169	176	219	219	133	358	452	166	221	452	298	953	364	94	1123	369	474	504	63	245	420	293	458	1540	391	237	151	161	124	111	113	160	128	24
CD3E	0	0	0	0	0	0	0	0	0	0	0	0	0	0	0	0	0	0	0	0	0	676	477	634	1006	919	1919	1049	237	2713	963	1357	982	179	645	1313	1034	1517	3223	1009	747	255	264	174	176	157	278	252	57
CD3G	0	1	0	0	0	1	0	0	0	0	0	0	1	0	0	0	0	0	0	0	0	227	164	141	281	191	632	275	53	632	241	325	235	42	179	331	162	381	887	200	144	75	55	57	48	11	78	83	6
PTPRC	0	1	0	0	0	0	0	0	0	0	0	0	0	0	2	0	2	0	1	0	0	1918	1296	2275	1846	2226	5931	2045	1357	8169	1636	4517	4304	443	2399	3351	3876	3666	5225	1575	2307	564	343	354	64	63	588	535	103
ITK	0	0	0	0	0	0	0	0	0	0	0	1	0	0	0	0	0	0	0	0	0	205	95	260	183	183	534	267	125	636	179	426	318	36	430	265	288	440	795	276	233	53	119	47	17	19	73	67	13
TEC	0	0	0	0	0	0	0	0	0	0	0	0	0	0	0	0	0	0	0	0	0	131	176	197	128	192	164	176	123	271	132	212	157	67	132	308	240	99	148	257	160	157	168	61	2	54	80	332	191
NCK1	0	0	0	0	1	0	0	0	0	0	0	0	0	0	0	0	0	0	0	0	0	2556	1550	1335	1860	2179	1848	1522	1289	2799	1671	1784	2060	1138	1808	3293	1945	1429	1966	926	1205	1061	600	491	59	149	538	1788	780
NCK2	1610	2288	1642	1408	2434	1774	1985	1280	1680	2248	1682	1160	2553	2500	1851	1786	1934	1847	1546	1360	2245	1973	3605	2900	2277	4882	2946	3301	1646	5587	5511	3836	2537	2974	2549	5396	4086	2752	3359	8401	3479	2130	1391	989	481	1488	1193	2735	1940
GRAP2	3	1	5	2	4	0	3	0	0	2	0	0	2	2	0	3	1	1	2	4	3	128	145	157	186	285	514	202	120	504	185	362	323	42	135	266	256	219	861	220	184	67	52	30	41	44	40	78	6
PAK2	0	0	0	0	0	0	0	0	0	1	0	1	1	0	0	0	0	0	0	0	0	2990	6032	4353	2744	6529	4260	5075	3233	7446	5489	4540	5991	3934	4460	7518	6058	4178	4699	4976	4182	4940	3215	2323	240	694	1948	6687	5623
PAK3	0	0	0	1	1	1	0	1	1	0	0	0	0	0	0	0	0	0	1	0	1	25	159	35	14	98	19	185	22	73	51	27	57	118	72	86	76	88	53	53	51	5	7	2	0	7	7	4	3
PAK4	0	0	2	0	1	2	1	0	0	4	1	1	4	2	0	0	1	0	1	0	1	3111	6583	4958	3667	6643	4676	5922	2061	7406	7701	5101	5506	1834	4275	8157	7730	3153	5530	5779	6401	1927	4415	1641	879	2600	2485	5490	3358
PAK6	1165	2672	1670	1386	1903	2142	2132	1847	2196	2662	944	885	2513	2071	1646	1206	2254	1392	2234	1212	1707	5	14	11	2	7	8	7	1	9	5	11	6	1	3	16	12	3	6	4	9	4	13	4	0	1	4	21	5
PAK5	183	90	299	34	57	83	117	198	663	363	58	225	122	473	329	300	191	51	823	448	612	1	8	0	0	2	2	3	0	4	2	1	3	12	5	4	3	9	2	12	3	0	4	0	0	0	0	0	0
RHOA	0	0	0	0	0	0	0	0	0	0	0	0	0	0	0	0	0	0	0	0	0	27084	27656	22775	22468	34533	26994	26570	13437	39244	32741	25103	37610	25437	20806	38751	29429	25121	26997	31908	24051	18369	18792	16890	1779	4439	13017	16808	29390
CDC42	18286	36144	25035	19251	32590	37179	38189	12715	19467	44852	20871	13613	44967	34924	27075	27346	27605	19351	16575	21977	31791	24838	11943	12452	13268	20724	13821	11893	8934	20706	15913	11656	18362	9707	15025	20149	15406	13970	13042	18702	12390	9750	5094	4811	466	863	4676	13228	11521
CD28	11	18	44	32	18	11	33	19	29	28	5	11	12	24	14	9	12	23	33	2	25	105	166	146	130	151	357	106	51	562	122	263	240	25	197	194	249	280	172	69	170	28	45	18	1	12	26	64	9
ICOS	4	2	7	2	8	3	8	3	2	6	6	1	14	6	6	7	4	7	0	4	9	36	19	37	40	39	140	54	36	234	29	72	182	0	38	55	73	70	104	27	68	22	38	48	25	6	39	44	6
MAP3K8	0	0	0	0	0	0	0	0	0	0	0	0	0	0	0	0	0	0	0	0	0	440	673	480	334	308	523	456	264	554	355	370	595	200	286	404	344	425	377	417	469	428	444	258	63	132	274	611	366
MAP3K14	0	0	0	0	0	0	0	0	0	0	0	0	0	0	0	0	0	0	0	0	0	650	879	1222	735	902	1249	1256	437	1532	1014	1257	1303	1442	1051	1479	1481	829	1165	2001	1530	256	1666	185	110	357	355	1124	159
CTLA4	524	444	420	349	438	255	389	465	232	518	612	480	611	362	517	576	271	1634	329	532	579	16	11	41	31	23	114	48	33	113	18	51	164	4	37	25	78	69	84	17	58	42	95	55	3	18	52	75	11
CBLC	0	0	0	0	0	0	0	0	0	0	0	0	0	0	0	0	0	0	0	0	0	2902	3374	3090	2669	5664	3789	3722	1690	4537	4820	4079	3102	401	3291	5520	4218	1742	4138	5362	3591	2294	2546	1013	992	3617	1743	2384	3993
CBL	0	0	0	1	0	1	0	0	1	2	1	0	0	2	1	1	0	2	2	0	1	385	1900	1493	835	1821	1838	1636	707	2366	1286	1823	1319	2152	1221	2110	1643	1396	1635	1310	1569	694	971	615	63	355	533	2375	926
CBLB	4	2	5	3	2	7	4	0	15	19	1	7	21	2	6	9	8	4	1	6	30	732	1703	1526	1000	1705	1346	1533	745	2187	1331	1528	1228	964	1363	2457	1788	1167	1373	2215	1210	825	519	402	32	226	484	1788	576
CDK4	0	0	0	1	0	1	0	0	0	1	0	0	1	1	0	1	0	0	0	0	1	3461	2657	1849	2359	2280	1977	2181	677	2953	2162	2164	3594	2276	982	2963	2465	1778	2161	1720	1749	4669	5777	2699	885	2168	2072	6383	2743
RASGRP1	0	0	0	0	0	0	0	0	0	0	0	0	0	0	0	0	0	0	0	0	0	96	113	200	194	206	396	177	99	478	147	336	282	40	127	287	233	225	484	144	188	55	72	150	0	2	47	78	16
PDK1	6	3	3	2	7	2	3	1	0	2	10	3	1	3	4	8	0	5	3	1	1	2202	1599	2004	1076	1753	2451	794	1130	2418	1365	1706	1551	459	1215	3129	2139	777	1797	807	1070	582	727	666	50	88	484	1008	5602
PRKCQ	0	0	0	0	0	0	0	0	0	0	0	0	0	0	0	0	0	0	0	0	0	65	93	103	114	156	275	123	40	270	127	182	182	60	104	172	168	167	351	153	102	25	120	22	42	99	52	16	12
[truncated: 472 more columns]
