# Supplementary material for: Identification of Immune-Related lncRNA Pairs and Construction and Validation of a New Prognostic Signature of Colon Cancer
Source: Can J Gastroenterol Hepatol. 2022 Mar 30;2022:5827544. doi: 10.1155/2022/5827544 (PMC8986404; doi:10.1155/2022/5827544)
Supplement: Supplementary Materials — Supplementary data 1: 2843 immune genes were downloaded from the ImmPort database. Supplementary data 2: a total of 1,342 immune-related gene mRNA expression matrices. Supplementary data 3: 694 immune-related lncRNA expression matrices. [file 5827544.f1.zip › 5827544.f1/Supplementary data 3.txt]

ID	TCGA-AA-3663-11A-01R-1723-07	TCGA-AA-3531-11A-01R-A32Z-07	TCGA-AA-3511-11A-01R-1839-07	TCGA-AA-3662-11A-01R-1723-07	TCGA-F4-6704-11A-01R-1839-07	TCGA-AA-3514-11A-01R-A32Z-07	TCGA-A6-2683-11A-01R-A32Z-07	TCGA-AA-3489-11A-01R-1839-07	TCGA-A6-2684-11A-01R-A32Z-07	TCGA-AA-3520-11A-01R-A32Z-07	TCGA-A6-2675-11A-01R-1723-07	TCGA-AA-3496-11A-01R-1839-07	TCGA-AA-3527-11A-01R-A32Z-07	TCGA-A6-2685-11A-01R-A32Z-07	TCGA-AA-3518-11A-01R-1672-07	TCGA-AZ-6601-11A-01R-1774-07	TCGA-AA-3516-11A-01R-A32Z-07	TCGA-AZ-6603-11A-02R-1839-07	TCGA-AA-3655-11A-01R-1723-07	TCGA-AZ-6600-11A-01R-1774-07	TCGA-A6-2678-11A-01R-A32Z-07	TCGA-AA-3713-11A-01R-1723-07	TCGA-AZ-6599-11A-01R-1774-07	TCGA-AA-3712-11A-01R-1723-07	TCGA-AA-3660-11A-01R-1723-07	TCGA-A6-2686-11A-01R-A32Z-07	TCGA-AA-3525-11A-01R-A32Z-07	TCGA-AZ-6598-11A-01R-1774-07	TCGA-A6-5659-11A-01R-1653-07	TCGA-AA-3517-11A-01R-A32Z-07	TCGA-A6-2671-11A-01R-A32Z-07	TCGA-AA-3534-11A-01R-A32Z-07	TCGA-AA-3697-11A-01R-1723-07	TCGA-AZ-6605-11A-01R-1839-07	TCGA-A6-5665-11A-01R-1653-07	TCGA-AA-3522-11A-01R-A32Z-07	TCGA-A6-2682-11A-01R-A32Z-07	TCGA-A6-5662-11A-01R-1653-07	TCGA-A6-2679-11A-01R-A32Z-07	TCGA-A6-2680-11A-01R-A32Z-07	TCGA-A6-5667-11A-01R-1723-07	TCGA-CM-5864-01A-01R-1653-07	TCGA-AD-6890-01A-11R-1928-07	TCGA-AA-3516-01A-02R-0826-07	TCGA-A6-2679-01A-02R-1410-07	TCGA-CM-4747-01A-01R-1410-07	TCGA-AA-3833-01A-01R-0905-07	TCGA-CM-6675-01A-11R-1839-07	TCGA-DM-A280-01A-12R-A16W-07
LINC00226	920	883	1191	739	1624	1865	1073	2389	916	1511	631	623	1751	1439	945	863	841	2106	616	2248	1346	1	0	0	0	1	0	0	0	1	0	0	0	0	0	0	0	0	1	1	0	0	0	0	0	0	0	0	0
AC005342.2	2	2	0	2	1	1	3	3	3	4	0	2	1	0	1	0	2	1	1	2	1	0	4	1	3	1	4	0	1	2	5	2	1	0	0	2	5	4	1	0	6	0	0	0	0	0	0	1	0
AL138733.2	841	1447	1107	1168	1216	716	1495	1080	1290	1689	1164	577	2569	1474	1239	1139	1106	991	1162	719	1901	0	0	0	0	0	0	0	0	0	0	0	0	0	0	0	0	0	0	0	0	0	0	0	0	0	0	0	0
DNAH17-AS1	11	23	32	14	13	15	19	0	23	28	5	2	17	10	202	14	28	2	8	10	13	0	4	1	0	0	1	2	0	0	0	2	3	0	0	0	0	1	0	1	1	4	2	2	0	0	0	1	3
SMG7-AS1	0	0	0	0	0	0	0	0	0	0	0	0	0	0	0	0	0	0	0	0	0	11	21	19	9	16	12	27	4	11	22	25	10	20	18	19	19	5	18	16	28	18	15	3	0	5	9	56	2
AC103740.1	11	2	0	2	4	1	3	4	5	2	1	1	1	3	0	4	0	3	5	3	2	123	89	159	22	112	61	126	53	34	123	68	63	651	64	136	70	267	87	216	86	12	15	2	0	3	7	16	2
CU633906.2	1139	1171	1011	910	1473	599	936	888	614	1171	1594	1027	1395	1017	1179	1006	841	1893	840	1139	1403	0	2	1	0	0	2	5	0	1	0	0	1	0	0	0	5	0	0	3	2	3	2	0	1	0	0	4	0
SOS1-IT1	0	0	0	0	0	0	0	0	0	0	0	0	0	0	0	0	0	0	0	0	0	19	45	25	23	28	30	55	17	38	19	29	23	22	30	37	46	32	28	32	22	29	31	9	4	5	14	29	54
AC003666.1	423	260	292	303	525	118	222	225	249	377	414	377	365	270	213	322	256	457	358	286	349	0	0	1	0	0	1	0	0	0	0	0	1	0	0	0	0	0	0	0	0	0	0	0	0	0	0	0	0
AL356215.1	4	0	2	1	2	6	3	0	1	2	3	1	1	3	2	3	0	3	0	4	3	2	7	3	4	2	3	9	2	2	6	8	4	4	0	5	3	4	5	5	3	10	4	1	0	1	3	27	3
LINC01238	61	63	72	71.5	155	31.5	64	29	25	71.5	90.5	69	59.5	64.5	64	82	26.5	94.5	46.5	80	97.5	26.5	23	34.5	17	19	77	40.5	13.5	21	9	24.5	57	11.5	26	20	61	14	25	25	55.5	6	20.5	4.5	1.5	1	4.5	10	3
AC007744.1	17	9	10	12	5	11	17	5	15	12	3	2	12	10	9	13	9	6	3	10	20	1	0	0	0	0	0	0	0	0	0	0	0	1	0	0	0	0	0	2	0	0	0	0	0	0	0	0	0
LINC02424	117	67	63	120	67	71	71	127	131	155	32	89	150	67	80	48	81	197	85	46	125	0	0	0	0	2	0	0	0	0	0	0	0	0	0	2	0	0	0	0	0	0	0	0	0	0	0	0	0
LINC00707	5969	9496	9102	7540	11009	9448	12859	5354	8839	13884	6014	4539	12289	11937	8979	8169	6999	5620	7005	8011	11363	1	1	2	2	1	3	4	2	2	2	5	2	3	2	3	2	0	1	0	2	0	0	1	0	0	0	1	2
LINC01561	0	0	0	0	0	0	0	0	0	0	0	0	0	0	0	0	0	0	0	0	0	0	0	0	0	5	1	4	5	1	0	0	1	18	2	0	2	13	1	4	1	0	17	5	0	0	11	28	6
AL391832.3	507	226	352	427	374	177	298	306	291	349	533	309	473	378	396	384	261	604	418	218	417	2	4	4	3	1	2	0	0	4	0	2	3	3	3	3	1	1	1	0	1	2	1	1	0	0	3	11	0
AC011389.2	0	0	0	0	0	0	0	0	0	0	0	0	0	0	0	0	0	0	0	0	0	0	0	0	0	0	0	0	0	0	0	0	1	0	0	0	0	1	0	0	0	0	0	0	0	0	1	0	3
PPFIA2-AS1	0	0	0	0	0	0	1	0	1	0	0	0	0	1	0	1	1	0	2	0	0	1	1	1	1	0	0	2	0	1	0	0	3	1	1	1	2	1	1	1	2	0	0	0	0	0	0	1	0
AC011731.1	0	0	0	0	0	0	0	0	0	0	0	0	0	0	0	1	0	1	0	1	0	4	1	2	0	3	1	1	1	2	3	0	2	2	0	1	3	0	0	4	2	2	4	0	0	0	1	1	1
AL031118.1	1435	4630	1623	604	1743	5606	2435	663	2286	4656	1021	1041	6907	2467	2912	1215	4211	1032	822	1667	2205	7	20	13	17	16	7	8	7	18	11	14	13	37	3	16	8	14	16	16	14	14	7	6	0	10	3	19	6
AL365226.1	3	5	4	9	6	0	5	3	6	1	1	2	4	0	1	2	6	3	3	6	3	0	1	2	0	2	0	2	0	0	0	0	0	0	2	0	0	1	0	1	0	2	0	0	0	0	0	2	0
AC105460.2	0	2	0	2	1	0	0	0	0	1	3	0	2	1	0	2	1	0	2	1	0	0	0	0	0	0	0	0	0	0	0	0	0	1	0	0	0	0	0	0	0	0	0	68	0	0	0	22	0
TTTY15	1	0	2	0	1	1	0	0	0	0	0	0	0	1	0	0	1	0	0	0	1	169	287	219	0	0	174	0	87	261	167	0	211	151	1	246	221	162	0	0	0	68	186	0	0	27	0	25	1
AP003071.4	0	0	2	3	0	1	0	0	0	0	1	1	1	2	2	0	1	0	2	0	0	8	75	21	13	42	8	121	22	16	145	20	60	424	22	24	32	212	26	134	49	1	9	3	0	2	12	8	7
AL157378.1	270	483	648	526	563	110	312	220	177	392	434	284	279	454	352	384	217	428	339	343	488	0	0	0	0	0	0	0	0	0	0	0	0	0	0	0	0	0	0	0	0	0	0	0	0	0	0	0	0
AC010531.5	0	0	0	0	0	0	0	0	0	0	0	0	0	0	0	0	0	0	0	0	0	3	6	7	0	6	3	16	4	3	1	4	1	4	14	12	7	1	4	13	10	1	2	0	0	0	0	3	0
Z73429.1	0	1	0	0	2	0	0	1	1	0	0	0	0	1	0	0	0	0	1	0	0	6	1	4	5	5	4	1	3	11	9	9	3	3	4	8	9	3	1	28	6	0	2	0	0	0	4	8	2
AC011466.3	0	0	0	0	0	0	0	0	0	0	0	0	0	0	0	0	0	0	0	0	0	1	2	6	0	1	4	11	0	1	0	3	4	0	1	3	4	1	4	0	5	4	2	3	0	3	2	13	1
MRGPRG-AS1	33	4	39	84	23	10	36	84	18	25	85	50	15	42	76	42	54	128	125	39	65	0	0	0	0	1	0	0	0	0	0	0	0	0	0	0	0	0	0	0	0	0	0	0	0	0	0	0	0
AL354920.1	4728	7972	6365	4754	9651	8421	6733	11474	6457	8895	4640	4226	8951	8609	5121	5106	6304	6193	8156	5180	5706	131	66	67	42	86	52	60	28	94	78	70	47	87	45	136	89	69	70	67	64	66	22	12	0	11	19	82	62
AC105052.3	343	167	266	253	408	97	358	152	209	524	340	213	260	134	348	335	155	404	96	603	469	0	0	0	0	0	0	0	0	0	0	0	0	1	0	0	1	2	0	2	0	0	0	0	0	0	0	0	0
LINC02125	4381	5107	4240	3944	5992	5766	8001	5703	5384	6829	3649	3372	6788	5586	4988	4274	4253	4165	5879	4234	6033	0	1	0	0	0	1	1	0	0	0	0	3	0	0	0	0	1	2	0	0	0	0	0	0	0	0	0	1
AC008869.1	3	1	5	1	5	3	0	1	6	6	4	2	4	1	2	0	0	4	0	4	6	0	0	0	0	0	0	0	0	1	0	0	0	1	0	0	0	0	0	0	0	0	0	0	0	0	0	0	0
AC136944.4	13	47	24	11	14	13	23	2	27	37	19	7	23	31	26	31	18	14	8	25	30	0	0	0	0	0	0	0	0	0	0	0	0	0	0	0	0	0	0	0	0	0	0	0	0	0	0	0	0
AL354726.1	44	38	69	58	75	35	29	13	41	57	29	16	31	57	36	97	22	38	31	91	84	0	2	0	0	3	4	6	1	1	1	1	1	2	3	2	1	0	0	0	0	2	5	1	0	1	0	3	0
HCG23	1845	2860	2313	2103	3038	3002	3414	2668	2534	3736	1644	1801	3451	2901	2371	1726	2402	2401	2994	1942	2957	1	7	5	3	4	5	27	4	16	14	10	5	29	5	12	9	13	5	9	3	0	0	0	0	0	0	1	2
AF279873.4	103	61	46	60	312	50	40	73	17	40	115	66	130	84	72	96	80	159	56	24	33	0	0	0	0	0	0	0	0	0	0	0	0	0	0	0	0	0	0	0	0	0	0	0	0	0	0	0	0
AC010894.2	0	1	1	0	0	0	0	0	0	0	0	1	1	0	0	0	1	0	0	0	0	14	11	11	6	14	10	21	6	19	13	7	8	15	10	17	14	10	13	14	14	17	8	4	6	2	4	30	13
AC013476.1	96	149	124	97	73	127	211	110	135	190	55	75	137	107	100	92	135	95	125	32	144	4	2	1	1	1	0	2	0	0	1	0	2	1	1	1	1	1	0	0	2	5	1	3	0	0	0	2	2
AC100848.1	97	209	478	135	107	422	162	120	157	243	58	93	229	293	171	207	277	206	210	116	171	0	0	0	0	0	0	0	0	0	0	0	0	0	0	0	0	0	0	0	0	0	0	0	0	0	0	0	0
TET2-AS1	0	0	0	0	0	0	1	1	0	1	0	1	0	0	1	0	0	0	0	0	1	0	1	2	1	2	0	2	1	0	0	1	0	0	2	0	0	2	0	2	1	0	2	0	0	0	0	1	1
AC092118.2	861	1547	1087	994	1278	1526	1489	1423	956	1660	1078	775	1721	1414	1107	997	1287	1069	1342	1089	1287	1	0	3	3	0	1	1	0	1	0	1	2	1	1	2	2	3	1	7	2	1	5	0	0	1	2	0	1
AC129492.1	0	0	0	0	0	0	0	0	0	0	0	0	0	0	0	0	0	0	0	0	0	4	31	31	17	12	18	24	2	16	14	28	7	2	9	41	23	19	5	5	29	7	12	7	11	3	28	0	7
PITRM1-AS1	10	20	18	8	20	9	13	10	4	19	4	3	16	15	6	12	12	4	10	7	15	15	30	27	10	20	16	37	9	17	22	33	21	20	24	40	20	21	20	35	30	15	26	21	4	7	10	42	9
AL596244.1	0	1	0	0	4	0	0	2	0	0	2	0	0	0	0	0	0	0	1	0	0	43	146	135	74	161	76	251	67	237	217	158	141	916	98	190	112	294	150	178	135	93	38	15	45	45	24	32	14
AC073575.1	3806	7590	4701	4442	6163	6324	6106	2359	6677	7968	2894	2022	7194	7525	6242	4433	6212	3090	4969	5379	6720	0	0	0	0	0	0	0	1	0	0	1	0	0	1	0	0	1	0	1	0	0	0	0	0	0	0	0	0
UBE2E1-AS1	1	0	1	0	0	0	0	0	0	1	0	0	0	0	1	0	0	0	0	4	0	1	3	2	0	1	1	1	0	2	0	2	0	1	0	1	0	3	3	2	0	2	0	1	5	0	0	2	0
MMP2-AS1	0	1	0	0	0	0	0	0	0	0	0	0	0	0	0	0	0	0	0	0	0	1	5	6	0	9	7	11	3	8	1	9	12	2	3	3	11	1	1	2	3	0	0	1	0	1	3	13	5
AC004232.2	10	9	16	15	38	14	10	3	21	7	28	9	19	18	17	5	14	16	25	6	32	0	0	0	0	0	0	0	0	0	0	0	0	0	0	0	0	0	0	0	0	0	0	0	0	0	0	0	0
AL513550.1	289	409	401	417	676	339	414	634	257	551	346	354	385	488	348	333	372	306	594	376	466	30	39	73	27	41	29	55	20	82	59	103	46	77	21	105	84	34	50	88	56	75	24	18	0	5	23	34	36
AC120498.10	0	0	0	0	0	0	0	0	0	0	0	0	1	0	0	0	0	0	0	0	0	15	46	59	26	25	25	13	5	35	29	40	56	55	4	39	58	53	23	23	15	1	4	3	10	2	3	1	3
LINC00559	0	0	0	0	0	0	0	1	0	0	0	0	0	0	1	0	0	0	0	0	0	0	0	0	0	0	0	0	0	0	0	0	0	0	0	2	0	0	0	0	0	0	0	0	0	0	0	0	0
AL392183.1	0	0	0	0	0	0	0	0	0	0	0	1	0	0	0	1	0	0	0	0	1	0	1	1	0	1	1	1	0	0	0	0	0	1	0	0	0	2	1	1	1	0	0	0	0	0	0	1	0
LINC00866	0	0	0	0	0	0	0	0	0	0	0	0	0	0	0	0	0	0	0	0	0	0	0	3	2	1	1	3	0	0	0	3	2	0	3	2	1	1	3	0	2	3	1	0	0	0	0	0	1
AC010307.4	6	7	1	1	5	5	3	5	14	10	4	1	14	10	6	3	6	9	3	1	10	0	2	1	0	0	0	0	0	1	0	1	0	0	0	0	0	0	1	0	2	2	0	0	0	0	0	0	0
AC022893.3	2226	2179	2157	1713	3102	1705	2377	1260	1980	2703	2660	1434	2963	2629	2348	2476	1760	2347	1813	2281	2905	0	5	2	0	1	1	2	0	0	1	3	0	1	0	2	0	0	0	0	0	4	0	0	0	0	0	0	0
AL356056.2	0	0	0	0	0	0	0	0	0	0	0	0	0	0	0	0	0	0	0	0	0	1	2	2	4	2	5	4	2	3	5	4	0	4	1	2	2	7	3	3	1	0	4	2	0	0	0	10	0
AC020611.2	1824	2191	2874	1767	3568	2142	2554	1446	1751	2731	2011	1345	2602	2570	1916	2580	1830	2383	1694	2387	2863	0	2	3	1	0	0	0	0	0	0	0	0	0	2	0	0	0	0	0	0	0	0	0	0	0	0	0	0
AC011287.1	0	0	0	0	0	0	0	0	0	0	0	0	0	0	0	0	0	0	0	0	1	0	0	1	0	0	0	0	0	0	0	0	0	1	0	1	2	1	0	0	1	0	0	0	0	0	1	0	0
AP001469.1	0	0	0	0	0	0	0	0	0	0	0	0	0	0	0	0	0	0	0	0	0	0	28	24	0	8	5	8	2	4	0	5	3	2	13	8	4	4	2	2	16	1	2	3	0	0	2	12	1
AC005180.2	31	35	51	38	57	28	46	45	27	48	40	19	44	52	32	59	22	41	35	26	55	34	21	23	14	28	4	40	8	24	33	16	42	74	6	33	7	52	16	15	34	0	2	0	0	1	1	2	1
AC015574.1	1	1	1	2	0	1	0	0	1	1	1	0	1	3	0	1	0	1	0	1	2	0	0	0	0	0	0	0	0	0	0	0	0	0	0	0	0	0	0	0	0	1	0	0	0	0	0	0	0
AC112220.2	2662	5511	3987	3364	4447	4322	5154	3011	4210	5961	3160	2264	5394	5114	4292	3345	4724	2990	4046	3016	5013	61	51	54	37	92	35	61	49	65	85	38	79	7	81	75	110	34	54	84	95	28	19	15	0	0	22	80	22
AC104090.1	157	240	227	133	266	179	254	56	279	494	108	53	255	271	217	92	343	41	165	123	283	0	2	2	1	0	0	1	0	0	0	0	0	0	0	0	1	1	0	0	1	0	0	0	0	0	0	0	0
AC008115.4	2	1	3	2	6	1	6	4	1	1	8	2	2	2	5	5	0	2	3	0	3	2	10	7	2	3	9	6	1	10	7	7	5	10	2	3	4	5	4	15	7	0	0	1	0	1	0	0	3
CMAHP	136	159	153	185	145	100	221	107	113	172	180	114	206	157	205	168	170	132	154	98	218	669	646	1473	881	766	614	368	298	555	554	537	611	266	320	616	774	666	1069	228	1087	52	89	39	2	2	83	59	43
AC007327.2	3976	7149	5325	4950	5548	5090	6168	3311	6716	7584	3577	2520	6715	6958	6074	4726	5388	3837	5478	4997	6455	0	0	0	0	0	0	0	0	0	0	0	0	0	0	0	0	0	0	0	0	0	0	0	0	0	0	2	0
AC074237.1	2516	1923	2274	2267	1932	2460	4480	1123	2363	3767	1498	1509	3394	2371	2874	2373	1530	1751	2235	2486	3579	29	0	5	2	0	1	0	0	0	0	0	0	0	0	4	2	0	0	0	0	0	0	0	0	0	0	0	0
AP005131.5	0	0	0	0	0	0	0	0	0	0	0	0	0	0	0	0	0	0	0	0	0	0	3	3	0	1	0	1	1	0	0	0	0	0	0	1	0	0	0	0	0	0	0	0	0	0	0	1	0
AC087388.1	0	0	0	0	0	1	1	0	1	0	0	0	0	0	0	0	0	0	0	1	0	14	31	49	29	25	15	65	20	26	19	30	24	12	13	47	30	16	27	24	36	40	97	20	1	24	31	58	26
AC092159.3	91	38	74	124	58	81	76	56	73	96	57	42	109	48	38	68	17	70	45	29	90	0	0	0	0	0	0	0	0	0	0	1	1	3	1	0	0	0	0	0	0	0	0	0	0	0	0	0	0
AC104184.1	26	39	17	20	80	24	23	24	14	16	25	13	42	14	14	35	21	41	18	56	30	5	28	31	4	14	14	22	17	11	13	21	15	23	13	8	17	19	22	15	27	5	4	3	0	3	0	8	4
AC090515.2	0	0	0	0	0	0	0	0	0	0	0	0	0	0	0	0	0	0	0	0	0	7	33	13	18	22	20	24	8	33	18	24	14	25	18	22	17	8	21	27	16	5	11	31	0	5	5	17	15
FO393401.1	0	0	0	0	0	0	0	0	0	0	0	0	0	0	0	0	0	0	0	0	0	10	11	12	7	8	24	8	2	27	5	14	16	5	8	17	24	8	24	6	14	4	6	1	0	4	2	1	2
AC069444.1	14	30	16	14	19	9	35	20	23	42	3	7	27	23	35	18	24	6	17	7	40	0	0	0	1	0	0	0	0	0	0	0	0	0	0	0	0	0	0	0	0	0	0	0	0	0	0	0	0
AL162726.1	2	5	7	6	1	2	3	0	0	4	1	2	3	8	3	6	2	2	6	2	5	0	0	0	0	0	0	0	0	0	0	0	0	0	0	0	0	0	0	0	0	0	0	0	0	0	0	0	0
AC084262.1	0	0	0	0	1	0	0	0	0	0	0	0	0	0	0	0	0	0	0	0	0	0	0	0	1	1	0	0	2	1	1	0	1	0	0	0	1	1	0	0	1	9	0	6	0	1	1	1	0
LINC01913	802	1069	783	1068	1022	777	1161	903	970	1336	994	624	1195	722	1028	902	1015	1024	1125	627	1221	0	0	0	1	0	0	0	0	0	0	0	0	0	0	1	0	0	0	0	0	2	0	1	0	0	0	2	0
AC099314.1	0	0	0	0	0	0	0	0	0	0	0	0	0	0	0	0	0	0	0	0	0	0	1	2	0	1	0	3	0	1	0	0	0	0	1	1	0	0	0	2	1	2	2	1	0	1	2	2	0
FGF13-AS1	1882	3083	2325	2097	3365	2647	2922	4101	2590	3307	1562	1804	3220	2917	2371	1819	2507	2299	3229	1620	2470	0	3	1	1	4	0	7	0	0	9	2	0	21	2	2	0	11	3	7	3	0	2	0	0	0	0	1	0
AL451129.1	0	3	1	1	0	0	0	0	4	3	0	0	1	0	6	1	0	0	0	1	3	0	0	0	0	0	0	0	0	0	0	0	0	0	0	0	0	0	0	0	0	0	0	0	0	0	0	0	0
AC063965.1	383	122	113	156	477	76	107	202	66	145	554	355	219	161	157	265	236	453	228	136	196	4	14	8	6	11	3	12	3	3	1	2	0	3	8	10	4	4	5	8	4	0	5	0	0	0	1	5	7
AC087741.1	23	29	13	35	22	13	24	14	38	19	9	13	31	18	25	38	24	6	32	11	19	30	152	170	31	81	128	178	57	93	23	195	33	20	61	119	125	32	33	107	190	110	201	5	7	64	34	396	36
AC022960.1	9	8	10	12	4	10	11	3	11	8	3	7	17	10	6	3	7	14	6	12	9	2	2	2	0	1	3	6	2	1	0	1	0	3	1	1	0	1	0	1	2	1	1	0	0	0	0	1	0
AL158835.1	0	0	0	0	0	0	0	0	0	0	0	0	0	0	0	0	0	0	0	0	0	0	4	3	1	5	2	8	4	3	1	3	2	2	2	6	4	1	0	3	3	2	0	0	0	5	0	7	2
LINC01681	1	8	4	3	9	0	2	1	1	5	0	1	1	2	1	4	2	8	2	4	3	0	0	0	0	0	0	0	0	0	0	0	0	0	0	0	0	0	0	0	0	0	0	0	0	0	0	0	0
LINC01931	0	0	0	0	0	0	0	1	0	0	0	0	0	0	0	0	0	0	1	0	0	0	0	0	0	0	0	1	0	0	0	0	0	0	0	1	0	0	0	2	2	0	1	0	0	0	0	0	1
LINC02391	14	16	16	13	19	4	4	49	1	12	45	29	14	21	12	7	17	44	9	15	9	6	7	3	4	4	3	1	1	4	2	9	5	5	1	8	4	5	6	3	4	0	3	0	0	0	1	0	0
AC084819.1	2826	5953	3466	3007	5144	5587	5304	5074	4002	6160	2383	2352	6013	5792	3317	3257	4319	2514	4667	3240	4307	0	1	0	0	0	0	0	0	0	0	0	0	0	0	0	0	2	0	0	0	0	0	0	0	0	0	0	0
TM4SF1-AS1	0	0	0	0	0	0	0	0	0	0	0	0	0	0	0	0	0	0	1	0	0	14	0	6	9	9	4	5	1	1	7	3	10	2	9	9	8	5	2	2	3	27	3	1	1	2	8	71	8
AL139042.1	22	23	73	47	34	18	27	10	22	41	19	12	23	35	32	68	9	27	32	26	33	0	0	0	0	0	0	0	0	0	0	0	0	0	0	1	0	0	0	0	0	0	0	0	0	0	0	0	0
LINC00482	0	3	2	4	0	1	1	2	2	2	0	2	2	5	0	6	1	0	3	4	2	59	83	152	86	123	56	72	95	207	141	115	60	22	135	160	169	51	36	123	226	5	153	29	6	23	39	173	26
AC016134.1	650	977	929	931	1053	757	985	535	597	1170	560	485	929	862	636	657	535	622	748	619	1009	0	0	0	0	0	0	0	0	0	0	0	0	0	0	0	0	0	0	0	0	0	0	0	0	0	0	0	0
LINC01762	45	29	103	120	52	19	70	47	25	54	51	51	35	41	42	45	22	36	108	18	40	2	3	6	2	4	3	8	4	3	3	3	2	0	7	2	6	4	1	7	2	27	2	4	4	1	2	2	0
AC053503.5	2	0	0	0	0	0	3	0	0	0	0	0	0	0	0	0	0	0	0	1	0	16	7	13	8	11	13	10	5	12	26	9	11	22	16	12	19	8	10	20	19	0	6	1	0	3	4	30	2
AL137026.1	213	128	256	258	60	144	237	43	463	563	176	80	154	242	439	351	134	43	237	222	334	5	5	0	1	5	4	2	1	1	5	7	7	11	3	5	4	7	4	3	1	0	2	0	0	0	0	0	1
AC108681.1	0	0	0	0	0	0	0	0	0	0	0	0	0	0	0	0	0	0	0	0	0	0	0	0	0	1	0	1	0	0	0	1	0	1	0	1	0	0	0	0	0	3	0	1	0	0	1	5	0
AL512785.1	6	6	11	11	14	6	4	10	5	4	18	7	5	8	6	5	5	13	5	4	4	0	0	1	1	0	0	0	0	0	0	0	0	0	1	0	0	0	0	0	0	0	0	0	0	0	0	1	0
AC138028.6	2	0	1	2	2	2	1	0	0	0	2	0	2	1	0	0	0	1	0	1	2	4	9	26	2	6	4	22	5	12	20	3	5	9	11	15	19	13	7	14	17	10	45	7	0	0	8	21	11
AL034428.1	4	12	13	13	37	15	26	46	26	30	11	8	35	18	32	7	11	14	24	15	18	0	1	0	1	1	0	4	1	1	0	2	1	0	1	0	0	1	0	1	2	0	1	0	0	0	1	1	0
AP000873.3	19	41	114	23	56	7	39	7	19	13	47	4	9	23	14	42	16	19	36	16	34	0	1	2	0	3	0	1	0	0	0	5	0	0	0	1	5	0	0	0	0	0	0	1	0	1	0	2	3
AC017071.1	0	0	0	0	0	0	0	0	0	0	0	0	0	0	0	0	0	0	0	0	0	1	11	10	12	15	9	10	8	10	19	8	6	2	11	13	8	17	8	26	7	8	10	1	0	0	1	9	10
LINC01231	1	5	1	0	4	6	8	3	6	14	1	7	14	4	4	0	4	6	2	1	12	0	0	0	0	0	0	0	0	0	0	0	0	0	0	0	0	0	0	0	0	0	0	0	0	0	0	0	0
AC074366.1	0	0	0	0	2	0	2	0	2	1	0	0	0	0	1	3	0	1	0	2	2	0	0	0	0	1	2	1	1	1	0	0	0	0	1	0	0	0	2	1	0	0	0	0	0	0	1	0	0
AL022157.1	78	53	111	108	105	47	81	116	60	96	99	54	71	83	79	97	46	84	113	59	97	2	7	12	7	3	9	3	4	9	2	5	2	6	6	8	4	2	3	10	9	17	4	2	3	0	1	12	2
FP325332.1	0	0	0	0	0	0	0	0	0	0	0	0	0	0	0	0	0	0	0	0	0	0	15	16	5	14	9	14	2	5	5	7	1	2	17	16	10	1	4	15	7	0	3	1	1	6	5	19	3
AL118508.1	0	0	0	0	0	0	0	0	0	0	1	0	0	0	0	0	0	0	0	0	0	5	11	7	5	0	0	8	2	2	2	2	2	4	0	1	3	11	2	4	1	0	4	0	0	0	1	80	0
LINC01370	12	18	23	11	46	34	34	15	28	45	16	16	37	31	24	10	25	20	13	6	31	0	0	0	0	0	0	0	0	0	0	0	0	0	0	0	0	0	0	0	0	0	0	1	0	0	0	0	0
AL162408.1	5	5	12	11	7	8	9	5	3	7	8	6	10	15	2	7	4	3	11	6	7	0	1	0	0	1	1	0	0	0	1	0	0	0	0	2	1	0	1	0	0	0	1	0	0	0	0	0	0
TMPO-AS1	59106	39417	21686	53677	26975	30036	127580	3017	96680	119737	15889	27682	69610	34444	60506	26127	54984	6734	32447	47060	117082	74	136	86	86	153	105	147	33	132	87	114	121	26	38	164	136	75	115	77	106	83	165	115	25	25	57	247	108
AL592546.1	0	0	0	0	0	0	0	0	0	0	0	0	0	0	0	0	0	0	0	0	0	64	25	29	32	77	50	22	25	47	42	37	56	4	43	51	37	25	38	45	18	4	20	10	7	0	5	36	13
LINC02029	0	0	0	0	0	0	0	0	0	0	0	0	1	1	0	0	0	0	0	0	0	0	0	0	0	1	0	0	0	0	0	0	0	0	0	0	0	1	0	0	0	1	0	1	0	0	1	7	5
AC011900.1	85	153	459	209	146	100	199	116	169	144	65	66	158	147	106	133	60	56	230	89	209	0	0	0	0	0	0	0	0	0	0	0	0	0	0	0	0	0	0	0	0	0	0	0	0	0	0	0	0
AL162274.1	0	0	0	0	0	0	0	0	0	0	0	0	0	0	0	0	0	0	0	0	0	0	5	2	2	0	4	1	0	4	1	5	1	7	2	3	3	4	0	0	3	0	5	0	0	0	0	5	4
AC099524.1	0	0	1	0	0	0	0	0	0	0	0	0	0	0	0	0	0	0	0	0	0	23	5	20	10	16	37	13	15	62	8	28	17	1	12	20	36	13	18	1	6	2	1	3	2	0	2	1	2
AL355001.1	0	0	0	0	1	0	0	0	0	0	0	0	0	0	0	2	0	0	0	0	0	0	4	2	2	1	0	6	1	0	2	3	0	2	4	2	0	1	1	1	3	0	1	0	0	0	5	2	0
LINC02030	0	0	0	0	1	0	0	0	0	1	0	0	0	0	0	0	0	0	0	0	0	0	1	0	0	1	0	1	1	0	0	0	0	0	1	0	0	0	0	0	0	0	0	0	0	0	0	0	0
AC000067.1	145	216	246	200	283	298	280	203	211	309	138	111	243	296	223	218	193	171	243	279	281	0	2	0	0	0	0	0	0	0	0	0	1	1	0	0	0	0	0	0	0	1	1	0	0	0	0	1	1
FIRRE	67	347	83	47	36	715	145	286	270	210	19	29	392	227	129	53	486	120	190	91	140	1	1	0	1	1	1	1	0	5	0	0	0	2	2	2	1	0	2	0	1	3	96	12	0	62	8	138	0
AC022916.4	0	0	0	0	1	0	2	0	0	0	0	0	0	0	0	0	0	0	1	0	0	0	0	0	0	0	0	0	0	0	0	0	0	0	0	0	0	0	0	0	0	0	0	0	0	0	0	0	0
AL096870.2	0	0	0	0	0	0	0	0	0	0	0	0	0	0	0	0	0	0	0	0	0	28	55	54	30	35	36	59	22	51	36	43	38	18	35	51	36	31	34	44	49	23	49	12	9	9	15	80	10
AC023509.4	0	0	0	1	0	0	0	0	0	0	0	0	0	0	0	1	0	0	0	0	0	50	45	35	24	38	28	51	12	30	28	36	42	37	16	42	56	50	38	33	59	13	56	27	2	11	16	51	39
AC112484.4	4	12	7	7	11	16	7	7	14	33	3	5	14	14	14	4	37	7	2	4	5	2	7	8	2	1	9	7	4	1	4	4	3	1	3	3	4	8	5	13	11	2	5	2	0	0	4	477	4
AC012254.3	319	888	297	288	403	529	744	267	786	763	169	215	792	558	715	276	706	188	476	359	806	1	7	12	4	2	0	16	1	3	3	7	1	4	7	11	5	0	1	6	14	0	1	1	0	0	1	1	0
AC027373.1	2655	4383	3248	2667	2613	3350	3790	2047	3743	4849	2635	1695	5195	3817	4404	2769	4014	2108	3139	3005	4897	1	12	8	4	5	7	17	4	5	4	3	1	2	13	8	9	6	5	7	16	4	30	3	0	5	2	7	3
AC090181.2	0	1	0	0	1	0	0	0	0	0	0	0	0	0	0	0	0	1	0	0	0	18	26	52	13	29	18	48	16	15	28	13	31	6	38	28	23	30	36	40	33	7	35	14	0	3	25	28	21
AP001267.2	0	0	0	0	0	0	0	0	0	2	0	0	0	0	0	0	0	0	0	0	0	0	0	2	0	1	1	3	0	0	1	1	1	1	0	1	4	1	1	5	3	1	2	0	0	0	0	0	0
AL138999.1	217	150	198	151	209	138	169	252	86	172	272	292	196	125	143	231	173	380	130	172	234	6	6	2	2	4	0	5	2	6	0	0	2	1	0	3	3	3	1	0	2	1	0	0	2	0	2	2	1
AC096751.3	0	0	0	0	0	0	0	0	0	0	0	0	0	0	0	0	0	0	0	0	0	25	13	37	25	29	32	30	16	30	43	42	34	13	60	36	33	30	55	69	31	12	5	8	1	0	1	4	8
AL353658.1	763	1043	725	703	1344	1000	1186	1214	801	996	571	526	1259	1074	767	860	726	782	1074	1006	904	0	0	0	0	0	0	0	0	0	0	0	0	0	0	0	0	0	0	0	0	0	0	0	0	0	0	0	0
AL589923.1	852	1167	1865	1228	920	1138	1747	783	914	1970	621	654	1496	1313	1199	1275	834	921	932	753	1496	0	0	0	0	0	0	0	0	0	0	0	0	0	0	0	0	0	0	0	0	0	0	0	0	0	0	0	0
AL035563.1	0	1	0	0	0	0	0	0	0	0	0	0	0	0	0	0	0	0	0	0	0	29	26	44	18	27	36	41	13	37	19	35	20	37	24	31	24	37	21	53	29	41	33	3	0	9	5	92	11
AC022424.2	32	43	35	47	46	30	24	23	73	53	31	7	71	40	28	28	46	32	39	14	43	0	0	0	0	0	0	0	0	0	0	0	0	0	0	0	0	0	0	0	0	0	0	0	0	0	0	0	0
AC007750.1	0	0	0	0	0	0	0	0	0	0	0	0	0	0	0	0	0	0	0	0	0	0	3	0	2	1	1	2	0	4	0	2	2	3	1	0	1	2	0	0	0	1	7	5	0	0	3	9	3
GTF3C2-AS1	0	0	0	0	1	0	0	0	1	0	0	0	0	0	1	0	0	0	0	0	0	3	16	26	4	3	5	31	2	3	8	11	10	0	10	14	3	2	7	5	15	7	16	4	2	4	5	15	4
AC010761.1	0	1	0	0	0	0	1	0	0	0	0	0	0	0	0	0	0	0	0	0	0	48	67	105	27	38	51	66	27	44	27	48	34	29	20	52	50	34	38	25	55	22	191	22	5	19	27	64	37
NEURL1-AS1	254	439	217	124	307	287	528	88	346	524	362	168	426	211	367	201	526	112	181	375	385	0	0	1	0	1	1	0	0	0	1	1	0	2	0	1	0	0	0	1	0	0	0	0	0	0	0	0	0
AL138767.3	0	0	0	0	0	0	0	0	0	0	0	0	0	0	0	0	0	0	0	0	0	7	6	2	5	7	4	1	4	4	4	5	4	0	2	10	5	4	2	2	5	0	2	2	0	1	3	13	1
AC005828.3	2	0	1	1	1	2	2	0	4	1	0	2	2	4	0	1	1	0	0	1	2	0	0	0	0	0	0	0	0	0	0	0	0	0	0	0	0	0	0	0	0	0	0	0	0	0	0	0	0
PTPRJ-AS1	6	0	24	0	15	0	0	5	0	0	8	0	0	0	0	34	0	0	10	9	1	0	1	2	0	0	0	5	0	0	0	0	1	0	1	0	0	0	2	3	3	0	0	0	0	0	0	2	1
AC021242.2	2	0	1	0	3	0	1	0	2	1	2	0	2	0	0	2	0	2	0	0	0	27	1	1	0	51	5	4	7	0	0	7	0	1	28	12	18	0	5	27	1	0	4	1	0	0	4	0	0
F10-AS1	3873	4234	6390	4423	8534	5093	5755	3607	3609	6480	4585	3132	6404	5994	4676	5368	3675	5739	3671	4129	5482	0	0	0	0	0	0	1	0	0	0	0	0	0	0	1	0	0	0	0	0	0	0	0	0	0	0	0	0
AC093462.1	0	0	0	0	0	0	0	0	0	0	0	0	0	0	0	0	0	0	0	0	0	3	3	3	0	1	2	1	0	2	2	7	3	0	4	2	1	0	5	3	2	2	3	1	0	0	2	7	3
AL137847.2	264	233	383	310	518	277	418	204	279	453	257	186	340	400	265	298	199	310	290	268	429	0	1	3	0	0	0	2	0	1	0	2	2	2	2	0	1	0	0	4	2	0	1	1	0	0	0	7	0
AL391807.1	0	0	0	0	0	0	0	0	1	0	0	0	1	0	0	0	0	0	0	0	1	10	21	12	5	8	7	26	4	10	6	11	6	35	9	7	2	12	13	14	13	0	2	0	0	0	0	0	0
DLGAP1-AS5	0	0	0	0	0	0	0	0	0	0	0	0	0	0	0	0	0	0	0	0	0	1	0	0	0	1	2	2	0	1	1	0	0	4	0	0	0	0	1	0	0	0	4	11	12	0	0	0	1
AL158839.1	0	0	0	0	0	0	0	0	0	0	0	0	0	0	0	0	0	0	0	0	0	2	1	2	2	4	1	2	1	1	0	3	3	2	1	1	5	1	3	1	0	0	4	3	0	0	1	8	2
LINC01549	0	0	0	2	0	0	0	1	0	0	0	0	0	0	0	0	0	0	0	0	0	0	0	0	1	0	2	4	1	0	0	1	1	0	0	1	2	0	0	0	1	28	0	0	0	3	0	1	0
AC117377.1	2	11	0	3	3	30	2	9	15	10	1	4	10	3	7	6	11	3	4	3	4	0	0	0	0	0	0	0	0	0	0	0	0	0	0	0	0	0	0	0	0	0	0	0	0	0	0	0	0
AL158840.1	8	10	25	20	27	3	20	16	20	10	14	7	17	11	6	17	13	9	20	5	15	0	0	0	0	0	0	0	0	0	0	0	0	0	0	0	0	1	0	0	0	0	0	0	0	0	0	0	0
AL133268.4	0	1	3	1	1	3	0	2	0	1	0	2	1	1	0	1	0	0	1	3	0	0	0	0	0	0	0	0	0	0	0	0	0	0	0	0	0	0	0	0	1	0	0	0	0	0	0	0	0
LINC00963	2	10	15	9	22	15	11	12	7	10	14	1	11	17	4	13	7	6	15	27	17	1079	1314	791	815	842	741	999	375	1106	1483	849	1444	2068	493	1083	850	1109	1076	1928	1080	1596	1463	364	182	450	577	2015	1587
LINC01239	1596	1861	1280	1317	2450	1724	2690	1264	1362	2527	2134	1274	2715	1998	1586	2021	1798	2176	1398	1112	2583	6	26	3	4	3	8	25	5	9	3	4	3	2	8	7	4	9	2	9	3	8	3	0	0	0	1	0	0
LINC00951	1485	1494	1753	1557	2872	1459	1910	1766	1007	1971	1856	1857	2278	1737	1506	1765	1291	2207	1554	1593	1994	0	0	4	0	1	0	0	0	0	0	0	0	0	3	0	3	1	0	1	1	0	0	0	0	0	0	0	0
AC073115.2	0	0	0	0	0	0	0	0	0	0	0	0	0	0	0	0	0	0	0	0	0	2	1	2	1	0	1	2	1	2	0	0	2	0	1	0	0	1	0	0	0	1	0	0	0	0	0	1	0
AC010519.1	2	4	0	0	4	1	39	0	3	1	7	0	0	0	3	0	32	0	0	1	1	2	1	4	0	2	2	2	1	5	1	0	2	1	2	2	3	1	0	4	1	1	3	1	0	0	1	2	0
AL391421.1	1	0	0	3	2	0	0	1	1	2	2	2	0	6	0	2	0	4	0	3	1	0	1	0	0	0	0	4	0	1	0	0	0	1	2	1	0	0	2	0	2	1	1	1	0	1	0	4	4
AL008628.1	2	5	7	7	4	2	2	6	2	8	8	0	6	2	5	9	4	5	6	8	5	7	2	4	2	6	1	8	4	5	1	4	2	1	6	0	4	3	3	2	5	1	0	0	0	2	0	1	0
AC084809.2	0	0	0	0	0	0	0	0	0	0	0	0	0	0	0	0	0	0	0	0	0	5	1	4	6	14	8	9	4	16	6	7	3	3	12	12	7	5	11	27	10	5	5	3	0	2	0	12	6
AC148477.1	861	1582	1417	1299	1164	1029	1455	680	1478	1673	652	393	2215	2228	1354	1420	898	940	1416	949	1396	0	0	0	0	0	0	0	0	0	0	0	0	0	0	0	0	0	0	0	0	1	2	0	0	0	0	0	0
AC090425.2	0	0	0	0	0	0	0	0	0	0	0	0	0	1	0	1	1	0	0	1	0	4	14	16	10	1	4	17	11	16	4	7	12	5	2	9	11	14	7	7	9	6	4	1	0	2	2	9	6
MGC27382	105	404	233	494	193	102	286	132	370	551	77	203	303	237	357	207	225	97	401	127	125	1	1	2	2	6	1	4	0	3	4	2	1	0	10	6	5	1	3	19	5	1	4	0	0	0	0	3	0
LINC01671	0	0	0	0	0	0	0	0	1	0	0	0	0	0	0	0	0	0	0	0	0	8	5	4	0	2	4	7	1	4	1	4	22	0	2	2	2	6	2	1	3	2	0	1	0	0	0	1	7
AC020558.1	957	726	698	544	1523	365	589	1051	284	828	2393	958	901	685	774	1519	635	2140	583	1358	871	0	1	1	0	1	3	2	0	2	2	2	2	0	1	6	2	0	1	1	1	1	1	1	0	0	2	1	2
AC026470.3	0	0	0	0	0	0	0	0	0	0	0	0	0	1	0	0	0	0	0	0	0	0	3	4	1	4	4	3	0	0	2	2	0	2	2	0	1	0	3	0	3	0	2	0	0	0	1	1	1
AL138812.1	48222	5795	2023	10553	64356	5487	1359	61616	1114	3036	74223	96990	15826	11706	13356	53794	33978	44506	45276	5643	11911	0	0	0	0	0	1	0	0	1	0	0	0	0	0	0	0	0	0	0	0	0	0	0	0	0	0	0	0
AP000919.4	0	0	0	0	0	0	0	0	0	2	0	0	0	0	0	0	0	0	0	1	0	2	11	17	0	5	9	9	1	7	6	3	2	1	7	5	3	3	4	5	8	1	0	2	0	0	3	8	2
AL121829.2	27556	42838	36312	23542	61283	70367	46338	40715	41964	58803	29689	23447	57021	57686	42851	36830	35147	37485	29657	36311	41067	2	0	2	0	2	2	2	1	3	3	4	3	0	2	2	2	1	3	0	1	3	2	6	5	3	0	10	1
AC026740.1	29722	30655	38487	43271	40431	40248	54847	37444	57195	50345	21779	24398	48509	46663	52325	30052	22776	31932	44818	36218	49280	15	14	14	10	55	19	30	37	38	22	17	15	6	49	27	42	18	40	3	25	3	114	2	13	13	5	61	18
AL121772.1	0	0	0	0	0	0	0	1	0	0	0	0	0	0	0	0	0	0	0	0	0	73	61	210	94	50	65	100	64	107	106	63	44	20	115	128	75	40	103	46	173	15	7	13	10	8	20	510	2
AL157912.1	1	5	3	1	5	1	6	4	2	4	0	2	0	7	4	2	4	4	2	1	2	0	0	0	0	1	2	1	0	0	1	0	0	0	0	0	0	0	4	2	2	0	1	1	0	0	0	0	0
TMEM254-AS1	0	0	0	0	1	0	0	0	0	0	0	0	0	0	0	0	0	0	0	0	0	20	14	16	11	53	8	33	5	44	13	29	12	27	24	40	16	30	10	17	18	7	18	1	0	10	8	36	8
AC128687.2	75	78	60	53	78	12	15	220	12	34	113	48	41	31	44	134	51	111	91	88	43	13	3	4	2	3	4	1	2	5	2	6	2	1	2	6	7	2	5	2	8	7	4	3	0	0	2	7	0
AP003555.2	1	0	0	0	0	0	0	2	0	1	0	3	0	1	4	0	0	0	1	0	3	1	18	3	1	4	5	1	1	3	4	5	1	0	5	17	11	2	3	2	8	1	5	33	0	4	16	8	6
LINC02073	31	88	34	33	37	88	76	48	100	94	15	29	74	57	83	28	139	34	42	25	71	1	1	1	1	0	0	0	0	2	1	0	6	0	2	0	0	0	0	0	0	1	0	0	0	2	1	1	0
LINC01894	15	28	352	54	35	18	57	27	28	42	14	58	27	12	26	32	10	535	32	18	46	2	0	0	1	7	1	5	0	4	6	2	7	1	1	2	0	0	0	1	0	0	0	0	0	0	0	0	0
MAP3K20-AS1	21	31	26	20	19	19	34	12	13	28	16	15	34	36	28	20	19	17	18	31	38	3	21	6	3	6	4	27	6	4	5	2	12	37	4	8	2	10	8	8	3	29	24	4	0	2	9	37	20
AC123768.3	1146	1687	1633	1356	1662	1535	2156	1099	1705	2322	1314	915	2071	2025	1625	1282	1570	1107	1582	1126	1852	4	4	9	7	1	5	7	5	8	5	2	1	3	3	8	6	5	4	14	10	7	1	1	0	0	0	2	3
AL161785.3	112	80	70	67	67	105	81	132	76	117	86	69	102	79	90	72	138	154	102	86	84	0	0	0	0	0	1	0	0	1	0	0	0	0	0	0	0	0	1	0	0	0	0	0	0	0	0	0	0
AC011330.2	0	1	0	0	0	0	0	0	0	0	0	0	0	2	0	0	0	1	0	0	0	1	10	18	10	19	7	7	7	13	5	8	7	8	11	16	12	4	5	10	11	2	13	1	0	1	4	12	19
XIST	0	0	0	0	0	0	0	0	0	0	0	0	0	0	0	0	0	0	0	0	0	0	8	1	822	1526	9	7346	0	1	8	1971	0	1	3647	9	2	6	1270	1888	5122	1	0	188	26	4	129	1	278
AP000266.1	4	9	3	1	12	3	5	0	10	9	3	1	9	7	2	5	21	1	8	13	6	0	0	2	2	0	0	4	0	1	3	0	1	1	0	1	2	0	2	1	2	0	4	0	0	3	0	0	2
AL031779.1	173	317	269	151	390	136	172	41	142	259	197	101	219	273	140	371	133	291	76	244	274	0	0	0	0	1	1	0	0	0	0	0	0	0	0	0	0	0	0	0	0	0	0	0	0	0	0	0	0
ZCCHC23	2	3	4	2	6	2	0	8	4	6	2	2	9	4	1	3	1	2	6	3	10	0	0	1	0	0	0	0	0	0	2	0	0	0	0	0	1	0	0	0	2	0	0	0	0	0	0	0	0
AL732372.1	3	7	11	7	6	14	3	2	9	5	0	5	10	10	9	4	6	3	5	4	5	0	0	0	0	0	0	0	0	0	0	0	0	0	0	0	0	0	0	0	0	0	0	0	0	0	0	0	0
AC119424.1	0	0	0	0	0	0	0	0	0	0	0	0	0	0	0	0	0	0	0	0	0	0	12	5	0	2	2	16	2	1	1	3	1	2	4	0	2	2	2	6	1	0	2	0	0	0	0	0	3
AC005920.3	0	0	0	2	0	0	0	0	0	0	0	0	0	0	0	1	1	1	0	0	0	3	4	3	1	2	2	1	1	1	1	2	2	1	0	2	3	0	1	1	3	1	7	0	0	0	0	13	2
LINC02154	1	0	1	0	5	0	0	0	0	1	0	0	0	2	0	1	0	0	0	1	1	0	1	8	4	4	1	0	0	1	8	0	8	1	0	1	0	1	2	0	1	4	4	13	0	0	4	1	26
LINC02238	0	2	1	1	3	2	0	2	0	2	4	0	2	0	0	1	1	0	0	0	3	0	0	0	0	0	0	0	0	0	0	0	0	0	0	0	0	0	0	1	0	0	0	0	0	0	0	0	0
AL031283.2	1	2	3	1	0	0	4	3	2	4	0	0	1	0	1	0	2	1	0	1	6	2	0	0	0	1	0	3	0	0	2	0	2	20	0	0	0	5	1	2	0	0	0	0	0	0	0	4	0
AC141930.2	0	0	0	0	0	0	0	0	0	0	2	0	0	1	2	2	0	0	0	0	0	0	0	0	0	1	1	0	0	0	0	1	0	0	3	2	0	0	0	0	1	0	0	1	0	0	1	0	3
TBC1D22A-AS1	0	1	1	1	1	1	0	0	0	0	0	0	4	0	1	0	1	2	0	1	4	0	0	2	0	1	2	4	1	1	0	0	0	0	1	1	0	0	0	0	0	0	1	0	0	0	0	0	0
AC023394.1	0	0	2	2	3	1	1	2	1	0	1	1	3	1	2	1	0	3	1	1	0	0	0	0	0	0	0	0	0	0	0	0	0	0	0	0	0	0	0	0	0	0	0	0	0	0	0	0	0
AC087286.1	36	23	37	21	42	16	18	43	20	37	55	27	54	23	21	24	20	34	24	36	32	0	3	0	0	0	0	2	0	0	0	0	0	0	2	1	1	0	0	0	0	0	0	0	0	0	0	0	0
AC051619.7	0	1	0	0	0	0	0	0	0	0	0	0	0	0	0	0	0	0	0	0	0	5	3	2	6	6	4	6	2	9	3	3	6	5	2	5	5	4	5	9	4	2	3	1	0	0	1	2	3
AC016745.1	0	1	0	0	1	0	1	0	0	0	0	0	0	1	0	0	0	2	0	1	1	0	0	0	0	0	0	0	0	0	0	0	0	0	0	0	0	0	0	0	2	4	0	0	0	0	0	1	0
AC096575.1	1627	3053	1661	1911	1480	16586	2235	13604	2168	3695	1262	1597	5196	3964	2068	1685	5401	6151	4219	2206	2045	0	0	0	0	0	0	0	0	0	0	0	0	0	0	0	0	0	0	0	0	0	0	0	0	0	0	0	0
AC009065.4	0	0	0	0	0	0	0	0	0	0	0	0	0	0	0	0	0	0	0	0	0	79	55	38	61	52	37	39	31	80	77	54	34	28	57	56	80	52	58	84	68	22	55	10	2	26	12	114	18
LINC01091	0	0	0	0	0	0	0	0	0	0	0	0	0	0	0	0	0	0	0	0	0	53	32	40	33	44	19	23	14	27	36	30	43	22	24	37	38	26	25	54	29	372	43	2	0	10	6	108	60
AC013553.3	0	0	0	0	0	0	0	0	0	0	0	0	0	0	0	0	0	0	0	0	0	6	18	6	5	8	8	26	2	9	8	7	5	18	11	10	1	9	6	15	5	0	2	2	0	0	3	1	2
AC109809.1	2	1	1	1	1	0	1	0	0	0	0	0	4	0	2	2	1	1	1	3	0	2	2	5	3	3	8	4	2	7	4	6	1	0	2	7	7	1	1	3	3	7	0	0	0	0	0	0	1
AL604028.1	485	859	595	517	845	969	931	1008	749	980	374	532	1073	1154	626	558	773	598	825	666	787	64	87	64	69	109	60	77	48	93	83	87	50	43	69	137	89	56	66	88	80	39	62	15	1	17	20	85	81
AL118558.4	0	0	0	0	0	0	0	0	0	0	0	0	0	0	0	0	0	0	0	0	0	15	37	27	15	27	10	37	11	20	27	20	18	23	16	20	35	22	20	12	14	15	13	5	0	5	6	14	14
AL157935.2	36	649	192	208	285	239	291	139	405	291	125	131	287	296	777	44	1049	52	282	68	217	4	13	253	87	6	34	14	4	21	46	19	39	5	35	19	20	20	21	5	472	1	5	1	0	0	9	7	0
AC007780.1	305	317	467	422	491	286	351	460	372	411	306	210	484	434	349	356	255	395	496	351	330	5	11	7	2	5	9	5	3	4	3	4	2	4	2	9	5	2	5	1	4	4	2	2	0	5	8	4	1
AL807752.3	1	0	1	0	0	2	2	0	2	4	0	0	6	1	0	2	4	0	1	1	3	0	0	0	0	0	0	0	0	0	0	0	0	0	0	0	0	0	0	0	0	0	0	0	0	0	0	0	0
LINC01709	348	412	877	302	397	504	297	387	316	556	281	294	470	502	299	597	432	636	396	351	340	0	0	1	0	0	0	0	0	0	0	0	0	0	0	0	0	0	0	5	0	0	0	4	0	0	0	0	2
AC011484.1	444	428	730	361	366	431	474	345	379	663	312	290	569	298	435	431	292	439	387	273	523	0	0	0	0	0	0	0	0	0	2	0	0	0	0	0	0	0	0	0	0	0	0	0	0	0	0	1	0
AC113331.1	308	219	23	768	260	171	224	446	65	343	397	427	142	37	38	201	181	12249	316	3	239	0	0	0	0	0	0	0	0	0	0	0	0	0	0	0	0	0	0	0	0	0	0	0	0	0	0	0	0
AP001001.1	2	1	1	2	0	0	2	2	1	0	0	1	1	0	0	2	0	2	1	1	0	1	8	13	4	0	0	10	4	3	4	0	2	5	7	5	9	2	5	8	3	7	2	5	0	2	0	15	2
AL512506.1	0	0	0	0	0	0	0	0	0	0	0	0	0	0	0	0	0	0	0	0	0	1	1	5	1	1	1	0	0	0	0	3	0	2	1	2	1	2	0	1	1	6	3	0	0	0	1	0	5
AC023043.1	7	5	64	100	59	3	23	8	14	21	7	8	22	27	12	21	16	14	34	5	25	87	101	45	65	52	94	68	26	93	92	55	36	13	29	97	84	38	50	333	27	29	22	25	0	1	13	292	81
AL353708.3	0	0	0	0	0	0	1	0	0	0	1	0	0	0	0	1	0	0	1	0	0	4	5	10	6	13	7	11	7	10	3	5	15	6	4	11	14	6	6	7	10	11	3	7	0	1	4	59	10
AC079163.1	2105	5994	3089	1862	3670	4653	4921	1523	2894	5559	2750	1407	5460	4605	2969	2713	5520	1309	1705	2837	3808	0	0	0	0	0	0	0	0	0	0	0	0	0	0	0	0	0	0	0	0	0	0	0	0	0	0	0	0
HIF1A-AS2	0	0	0	0	0	0	0	0	0	0	0	0	0	0	0	0	0	0	0	0	0	2	8	7	1	8	2	5	6	3	2	5	3	3	9	18	5	6	1	2	11	3	3	1	1	1	2	26	8
AL662797.2	8308	2974	4930	3856	5059	3919	7772	2052	5543	10604	2663	3712	10848	5856	7261	3434	4721	10339	4051	2377	13103	26	23	8	20	25	12	17	14	29	15	12	54	15	27	21	18	11	16	20	41	8	56	0	0	20	1	20	24
AC078795.3	12	108	15	18	11	2	13	12	14	9	9	11	31	15	7	15	16	7	6	8	21	0	0	0	0	0	0	0	0	0	0	0	0	0	0	0	0	0	0	0	0	0	0	0	0	0	0	0	0
WWC2-AS2	648	536	724	884	728	503	1025	690	971	1189	296	555	1121	624	747	276	827	1076	1036	331	1164	4	9	6	0	9	7	9	0	9	9	7	16	17	3	14	10	7	7	10	12	2	2	6	0	2	6	1	3
AC006450.1	0	2	0	0	3	1	0	1	1	0	2	0	3	0	2	2	5	0	0	3	0	0	0	0	0	0	0	0	0	1	0	0	0	0	0	0	0	0	0	0	0	0	0	0	0	0	0	0	0
AC114814.1	758	606	396	459	650	1214	696	789	544	764	511	457	1233	750	638	716	747	857	586	1042	741	0	0	0	0	0	0	0	0	0	0	0	0	0	0	0	0	0	0	0	0	0	0	0	0	0	1	0	0
AC083805.3	451	243	771	1158	498	409	1140	142	507	1157	443	204	624	481	760	445	153	575	423	420	1143	0	0	1	0	0	2	2	0	4	2	0	0	1	2	3	1	1	1	1	1	1	0	0	1	2	1	0	0
AC006483.2	2939	4853	3085	2593	2707	4956	5488	1434	4157	6670	2386	2097	6440	4458	6287	2939	4684	2369	2768	3613	6292	0	0	4	0	2	0	1	1	0	0	0	0	0	1	1	0	0	1	2	2	0	3	0	0	0	4	2	0
AL357833.2	0	1	5	2	6	0	2	3	0	0	9	1	1	2	1	3	0	3	0	2	2	0	0	0	0	0	0	0	0	0	0	0	0	0	0	0	0	0	0	0	0	0	0	0	0	0	0	0	0
LINC00958	0	0	0	0	0	0	0	0	0	0	0	0	0	0	0	0	0	0	0	0	0	0	2	1	8	0	0	3	1	1	0	0	0	1	3	2	1	1	0	0	5	10	2	1	2	4	1	0	4
AC073073.2	699	518	452	675	532	307	647	355	430	725	569	523	675	402	659	580	458	1190	592	406	791	29	58	42	27	44	34	48	16	54	36	34	49	26	27	50	65	44	41	42	32	45	34	26	1	6	26	54	61
AC018616.1	656	1618	1077	1123	1097	1060	1185	1478	1080	1503	855	870	1411	1144	1101	860	1225	936	1450	749	1096	0	0	0	0	0	0	1	0	0	1	2	0	0	0	0	0	0	0	0	1	0	0	0	0	0	0	0	0
AC108449.1	0	1	0	0	0	0	0	0	0	1	2	0	0	1	2	1	1	0	0	3	0	1	1	2	1	1	2	2	1	3	1	3	3	0	6	5	0	2	2	1	5	0	1	1	0	0	1	1	0
LINC01315	0	0	0	0	0	0	0	0	0	1	0	0	0	0	0	0	0	0	0	0	0	33	79	51	54	42	62	68	16	91	77	77	58	113	18	54	61	63	31	43	50	218	351	32	41	22	79	113	142
LINC01734	0	2	0	2	1	1	1	2	3	1	1	2	1	2	6	0	1	1	0	5	0	0	0	0	0	0	0	0	0	0	0	0	0	0	0	0	0	0	0	0	0	0	0	0	0	0	0	0	0
AC012313.7	0	0	0	0	0	0	0	0	0	0	0	0	0	0	0	0	0	0	0	0	0	8	22	16	17	15	7	19	8	9	23	27	14	11	10	27	19	12	16	19	24	5	12	6	0	1	2	41	3
LINC01645	194	178	281	297	513	239	227	476	133	254	258	245	268	314	179	293	126	282	282	223	254	126	24	21	27	225	28	28	81	189	24	56	16	3	116	168	90	29	73	39	35	0	12	0	0	1	5	1	1
AC106900.2	0	0	0	0	0	0	0	0	1	0	0	0	0	0	0	1	0	0	0	0	1	6	5	9	9	3	0	4	3	0	13	10	3	0	6	5	2	2	2	7	2	45	18	6	14	12	3	43	58
AL158151.3	1	1	2	0	2	2	0	0	1	0	0	1	4	3	1	3	0	2	0	1	0	0	0	0	0	0	0	0	0	0	0	0	0	0	0	0	0	0	0	0	0	0	0	0	0	0	0	0	0
AL590822.2	0	0	0	0	0	0	0	0	0	0	0	0	0	0	0	0	0	0	0	0	0	3	8	8	1	3	3	9	3	7	3	5	1	0	5	10	3	2	3	12	6	2	2	2	0	0	4	1	0
AC125611.4	0	0	0	1	0	0	0	0	0	0	0	0	0	0	0	0	0	0	0	0	0	0	8	4	0	3	1	11	0	5	3	1	0	9	2	3	0	0	4	7	3	1	1	0	0	1	1	4	1
LINC00885	1	3	3	1	7	0	2	3	3	3	5	4	2	6	5	5	2	5	0	8	4	0	1	1	0	1	0	0	3	3	0	0	1	0	0	2	1	1	0	0	0	0	0	0	1	4	0	12	0
LINC01116	2413	3544	3432	1769	6311	5102	3708	4629	2404	4823	2453	1656	5092	4311	2042	3042	2879	3291	2208	3782	2623	92	170	75	87	214	74	153	63	265	92	96	141	331	94	157	64	167	106	93	51	37	41	29	4	37	62	39	36
TMEM5-AS1	0	0	0	0	0	0	0	0	0	0	0	0	0	0	0	0	0	0	0	0	0	3	1	0	1	4	1	1	0	3	6	1	0	19	0	3	1	4	1	4	0	1	2	0	1	0	0	0	0
AC004923.1	7	12	19	15	22	13	13	9	15	18	8	6	9	16	6	18	13	14	10	12	22	12	11	12	14	10	15	9	10	17	16	11	11	2	4	25	16	8	8	21	21	10	16	0	1	3	2	51	4
AL049869.3	1	3	2	3	1	0	3	1	2	0	2	2	0	0	0	2	0	0	1	0	2	0	11	19	1	6	3	20	5	2	2	6	1	4	3	17	4	5	5	6	14	9	3	1	0	0	0	12	1
LINC02397	0	0	0	0	0	0	0	0	0	0	0	0	0	0	0	0	0	0	0	0	0	19	2	22	12	9	33	73	16	161	6	47	30	31	30	26	46	31	9	6	25	1	2	1	0	2	2	2	0
AC007773.1	1433	4711	2843	2509	2690	3170	3390	1147	2708	3722	1186	1229	4381	3696	2492	2151	3295	1149	1969	1473	3238	6	9	2	6	7	9	13	4	16	2	14	0	10	1	12	3	6	4	19	5	9	20	5	0	0	16	127	18
LINC01551	15	34	11	21	13	12	32	10	27	38	6	9	21	21	16	6	23	11	12	15	43	0	0	0	0	0	0	0	0	0	0	0	0	0	0	0	0	0	0	0	0	0	4	0	0	0	0	0	0
AL160286.3	0	1	1	0	2	1	1	1	0	0	1	0	4	2	0	1	2	2	1	0	6	5	4	15	3	14	13	5	16	10	0	18	12	0	25	23	9	5	13	4	1	1	4	2	0	2	1	12	2
AC020916.2	0	0	0	0	0	0	0	0	0	0	0	0	0	0	0	0	0	0	0	0	0	0	0	0	0	0	0	1	0	0	0	0	0	0	1	2	0	1	0	1	0	0	2	0	0	0	1	0	1
AC244131.2	576	1978	560	486	581	1413	696	422	888	820	283	206	1173	1091	396	537	752	453	727	566	1129	0	0	0	0	0	0	1	0	0	0	0	0	0	0	0	0	0	0	0	1	0	0	0	0	0	0	0	0
SNAI3-AS1	0	0	0	0	0	0	0	0	0	0	0	0	0	0	0	0	0	0	0	0	0	52	54	134	42	57	55	63	31	67	53	62	63	56	26	60	107	72	59	55	84	23	104	14	15	11	19	108	39
LINC00865	989	705	1335	795	1101	975	1410	529	667	1479	575	739	1196	547	950	706	638	882	504	1081	1364	50	116	123	125	90	50	105	53	108	194	101	100	76	54	288	124	309	59	193	121	9	101	5	0	13	11	21	9
AL355140.1	977	1090	1350	1228	2518	1411	1694	1404	1019	1694	898	789	1704	1522	1106	1298	797	1158	1415	1997	1389	0	0	0	0	0	0	0	0	0	0	0	0	0	0	0	0	0	0	0	0	0	0	0	0	0	0	0	0
AC079336.5	0	0	0	0	0	0	0	0	0	0	0	0	0	0	0	0	0	0	0	0	0	5	65	93	24	70	36	73	20	68	59	76	17	12	67	77	80	24	51	41	69	2	47	5	0	16	9	32	4
MSC-AS1	2011	3934	3339	2665	4237	3767	3553	2880	2201	4144	2141	1664	4403	3897	2626	3179	2671	3160	2810	3212	3201	73	141	71	84	89	76	116	24	116	64	78	114	57	66	95	78	64	79	54	65	49	60	20	1	13	53	61	57
AC026167.1	0	1	0	1	2	3	1	0	0	2	0	1	2	1	0	0	0	0	0	0	0	0	0	0	0	0	0	0	0	0	0	0	0	0	0	0	0	0	0	0	0	0	0	0	0	0	0	0	0
AC096947.1	0	0	0	0	0	0	0	0	1	0	0	0	0	0	0	1	0	0	0	2	1	0	3	2	0	1	0	1	0	0	0	0	0	1	2	0	1	0	1	1	1	0	1	0	0	0	1	4	2
AIRN	908	1252	1295	1097	1480	1469	1429	1561	1470	1656	901	794	1472	1600	1128	1233	1099	1243	1542	1033	1524	0	0	1	0	1	0	1	0	0	0	0	0	0	1	0	0	1	0	0	0	1	0	0	0	3	1	0	0
AC024884.2	1418	2276	1737	1915	2109	1582	1950	627	1880	2396	959	654	2643	1951	2196	2407	1732	1380	1761	1943	2262	1	0	0	0	0	1	0	0	1	0	0	0	1	1	2	2	0	1	1	1	2	3	3	0	1	0	39	2
AC026310.2	0	0	0	0	1	0	0	0	0	0	1	0	1	0	1	0	0	0	0	0	0	0	0	0	0	0	0	0	1	1	0	0	1	0	0	0	0	0	0	0	0	0	0	0	0	0	1	1	6
AC022916.1	6	3	10	7	8	6	9	10	8	6	5	3	6	7	6	9	4	3	11	4	8	30	24	48	32	39	63	86	19	80	36	66	39	61	23	36	41	71	51	76	23	22	33	11	2	1	1	100	13
AC010754.1	3165	4046	4721	3627	5768	2697	4815	2327	3216	5177	4451	2530	5643	4884	4032	4230	3345	3896	2939	4591	5516	8	7	7	5	5	3	8	5	13	2	6	9	9	7	5	15	4	8	6	11	3	3	4	0	2	2	9	1
AL161908.1	3359	7536	4222	4738	3532	4314	5497	3728	5790	6527	2712	2376	6942	4579	4833	3589	6497	3093	5346	2743	4934	0	0	0	0	0	0	1	0	0	0	0	0	3	0	0	0	5	0	0	0	1	0	0	0	0	0	0	1
AC003070.1	24	33	28	45	40	14	25	34	19	22	63	25	28	26	38	43	29	36	39	46	36	15	76	173	31	53	57	106	56	66	38	100	29	7	101	101	85	17	50	73	118	22	101	10	1	18	29	145	10
AC084024.3	3	5	4	5	3	2	3	8	0	1	3	5	5	4	5	4	5	6	5	5	6	1	1	1	0	0	0	0	1	1	0	0	0	0	0	1	1	1	0	0	1	0	0	0	0	0	1	0	0
ILF3-AS1	28	42	37	32	23	24	25	14	28	36	25	12	38	33	24	46	33	36	27	36	32	1035	1001	745	733	829	608	1046	323	798	965	750	725	1059	543	1117	790	686	724	926	997	557	1253	345	47	127	280	1679	449
AC087222.1	0	1	2	1	2	0	0	3	0	0	2	2	0	0	0	2	2	1	1	0	0	0	10	10	1	1	4	7	0	4	6	1	3	2	7	4	4	0	4	3	2	2	9	0	12	1	2	8	1
AP003071.1	2270	2448	2793	1795	2547	1934	2747	881	2134	3333	2552	1218	3081	3239	2508	2749	2132	2693	1354	1342	3294	0	1	1	0	0	0	2	0	0	0	1	0	5	1	0	0	0	2	4	0	0	2	1	0	0	0	1	0
AC100827.3	565	818	816	734	1029	666	894	982	545	974	771	681	845	737	566	857	678	802	852	579	901	0	0	0	0	0	0	0	0	0	0	0	0	0	0	0	0	0	0	0	0	0	0	0	0	0	0	0	0
AL445209.1	0	0	0	0	0	0	0	0	0	0	0	0	0	0	0	0	0	0	0	1	0	0	0	0	0	0	0	0	0	0	0	0	0	0	0	0	0	0	0	0	0	0	1	0	0	0	0	0	1
AC004540.1	0	0	0	0	0	1	0	0	0	0	0	0	1	1	0	0	2	1	0	1	0	14	40	19	17	28	20	29	4	30	26	10	21	20	10	15	22	23	34	18	25	16	37	10	0	4	16	14	3
AL096828.3	1200	2146	1816	1745	2321	1752	1989	2325	1442	2317	1305	1169	2363	2264	1390	1512	1534	1183	2248	1326	1823	6	1	3	3	3	5	3	3	4	4	6	2	2	1	1	3	4	6	5	5	5	13	9	1	0	2	28	9
AC074011.1	31	38	59	41	37	48	58	34	34	57	43	36	50	53	75	45	57	44	50	35	81	3	6	2	4	5	2	5	0	6	1	0	2	1	5	5	2	1	6	23	5	2	1	0	1	0	0	0	2
LINC01346	741	717	681	712	1190	807	1104	1473	880	1007	707	804	1162	865	787	655	760	1025	1069	573	797	1	0	0	0	0	0	1	1	0	0	0	0	1	0	0	0	0	0	0	0	3	2	0	0	0	0	0	0
AC096586.1	1	1	1	0	1	0	0	0	1	6	0	1	2	3	2	0	0	1	0	0	3	0	0	0	0	0	0	0	0	0	0	0	0	0	0	0	0	0	0	0	0	0	0	0	0	0	0	0	0
MINCR	0	0	0	0	0	0	0	0	0	0	0	0	0	0	0	0	0	0	0	0	0	120	120	155	94	112	109	118	56	93	116	99	97	48	39	102	130	111	66	109	142	224	164	51	37	40	108	214	99
AL355306.2	1336	1949	1637	1999	1305	1364	2019	1371	1743	2088	1037	1035	2170	1763	2019	1289	1925	2574	2124	970	2332	0	0	0	0	0	0	0	0	0	0	0	0	0	0	0	0	0	0	0	0	1	0	0	0	0	0	0	0
AC073342.2	3	0	1	0	2	0	2	10	0	0	3	4	0	0	1	1	1	8	2	2	1	0	0	0	0	0	0	0	0	0	0	0	1	0	0	0	0	0	0	1	1	0	0	0	0	0	0	0	0
AC018690.1	438	816	615	474	625	528	571	422	690	696	380	309	771	772	631	604	681	551	542	439	705	6	31	29	12	29	18	27	7	17	15	23	20	7	19	21	15	14	16	26	24	11	20	10	2	10	5	14	16
LINC00649	1	0	3	2	0	0	0	0	0	1	2	1	1	0	0	2	3	0	0	1	0	90	257	149	82	176	229	164	23	220	115	280	146	124	167	208	378	105	384	382	293	611	81	191	39	4	46	57	276
AC008125.1	1458	2163	1904	1729	2266	1954	2454	2102	1411	2770	1582	1329	2795	2361	1846	1937	1684	1882	2314	1538	2391	0	0	0	0	0	0	0	0	0	0	0	0	1	0	0	0	3	0	0	0	0	0	0	0	0	0	0	0
TMEM246-AS1	1	0	0	1	0	1	1	1	1	2	0	0	2	2	1	3	2	0	0	5	0	2	5	6	1	0	3	4	1	0	0	2	1	1	0	3	1	1	0	4	3	1	0	1	0	0	1	3	0
LINC00273	1	0	2	90	149	145	1	212	151	212	84	70	4	4	4	67	3	0	1	0	4	0	0	0	0	0	0	0	0	0	0	1	0	0	0	0	0	0	0	0	0	0	0	0	0	0	0	0	0
AL161725.1	0	0	0	0	1	0	0	0	0	0	0	0	0	0	0	0	0	0	0	0	0	7	28	23	7	14	21	24	7	15	4	15	7	2	9	22	18	6	15	8	17	20	4	3	0	1	5	8	7
AL691432.2	0	0	0	0	0	0	0	0	0	0	1	0	0	0	0	0	0	0	0	0	0	178	400	346	226	432	270	412	159	391	464	306	395	203	335	618	500	371	378	467	610	127	83	123	14	25	113	528	127
AC026471.2	0	0	0	0	0	0	0	0	0	0	0	0	0	0	0	0	0	0	0	0	0	17	12	5	3	6	3	7	1	7	10	8	4	13	2	7	6	18	5	9	9	2	6	2	0	0	4	16	2
AC013402.2	6	5	8	4	19	15	20	9	18	39	9	6	19	19	12	12	10	10	4	9	16	0	0	0	0	0	0	0	0	0	0	0	0	0	0	0	0	0	0	0	0	0	0	0	0	0	0	0	0
LINC00331	1829	2613	2518	2356	3010	2301	3173	1653	2459	3592	2062	1413	3196	2993	2335	2194	1912	1989	2393	1903	3411	0	0	0	0	0	0	0	0	0	0	0	0	0	0	0	0	0	0	0	0	0	0	0	0	0	0	0	0
AC012435.2	0	0	0	0	0	0	0	0	0	0	0	0	0	1	0	0	0	0	0	0	0	1	3	10	4	5	3	9	2	5	3	5	4	4	2	7	4	4	1	5	4	1	5	0	0	1	5	7	1
LINC01224	0	0	0	0	0	0	0	0	0	1	0	0	0	0	0	0	0	0	0	0	0	280	352	439	407	580	370	485	182	459	472	498	337	54	302	917	472	285	393	391	450	99	375	34	54	51	78	31	264
AL121895.1	1	2	2	0	3	0	1	2	3	1	2	3	0	3	2	0	1	1	2	1	2	0	9	2	1	3	4	11	2	9	3	5	3	3	3	14	5	4	6	0	5	7	4	1	0	5	4	19	1
AL391261.4	2670	3926	3369	2753	3865	3557	3821	3295	5032	4610	2130	1800	4382	4673	3070	3262	3305	2358	4539	3189	3530	1	0	2	1	0	2	1	0	2	2	2	1	2	0	1	1	2	2	0	1	8	1	0	0	0	0	1	0
SMIM2-IT1	17	3	2	4	31	2	0	20	2	2	35	30	13	4	9	33	24	16	29	1	11	1	2	3	2	4	0	4	3	1	3	2	1	0	11	3	3	3	1	4	6	2	1	0	0	0	0	0	0
AC136475.1	0	0	0	0	0	0	0	0	0	1	0	0	0	1	0	0	0	0	0	0	0	12	15	16	26	11	65	26	6	12	21	13	15	42	5	17	6	18	10	9	11	23	16	1	1	6	2	22	7
AL353807.2	0	0	0	0	0	0	0	0	0	0	0	0	0	0	0	0	0	0	0	0	0	1	0	1	1	0	1	1	1	0	0	2	1	0	1	2	1	0	1	1	2	2	0	0	0	0	1	1	1
HCCAT5	3078	3227	5063	3620	6550	4241	4228	6467	4103	5102	3283	2882	5001	5225	3445	3745	2708	3844	5192	3597	3901	0	11	0	0	0	0	1	0	0	2	1	0	1	1	1	0	1	0	0	0	0	0	0	0	0	0	1	0
AC130462.1	233	358	275	212	422	226	637	319	389	410	317	311	509	359	339	293	252	459	493	370	500	0	2	1	1	0	1	6	0	2	1	1	1	1	0	1	0	0	2	1	2	0	5	0	0	0	0	0	0
AC010401.3	2	2	2	0	3	2	1	0	1	4	0	1	2	1	1	2	1	1	1	6	2	0	0	0	0	0	0	0	1	0	0	0	0	0	0	0	0	0	0	0	0	0	0	0	0	0	0	0	0
AC003092.1	7	20	14	8	54	19	14	28	15	32	8	12	25	20	10	7	9	16	20	9	19	0	0	0	1	0	0	2	0	0	0	0	2	3	0	0	3	1	0	0	0	0	0	1	0	0	2	0	0
AC012629.1	1050	6736	6676	221	1365	1432	2722	2510	1275	4124	1583	315	4319	1429	986	1313	1300	20512	1420	725	1880	0	0	0	0	0	0	0	0	0	0	0	0	0	0	0	0	0	0	0	0	0	0	0	0	0	0	0	0
DPYD-AS2	0	1	3	2	1	0	0	0	0	1	0	0	0	0	0	0	0	0	1	0	1	0	0	0	0	0	0	0	0	0	0	0	0	0	0	0	0	0	1	0	0	0	0	0	0	0	0	0	1
AC126177.2	2	2	1	1	4	2	1	2	2	2	1	1	4	3	3	2	2	3	2	0	3	0	0	1	0	3	0	0	0	0	0	0	0	0	0	1	2	0	1	1	1	0	0	0	0	0	0	0	0
Z98882.1	2699	8382	3081	2618	2368	6080	5933	1545	6367	7438	1860	1651	7131	5200	5702	2382	8357	1249	3529	2364	5239	46	31	31	13	18	14	23	3	22	24	21	25	26	14	25	34	23	21	27	17	23	43	33	1	10	20	78	8
AC011899.1	0	0	0	0	0	0	0	0	0	0	0	0	0	0	0	0	0	0	0	0	0	0	4	3	1	1	1	2	1	0	1	2	0	0	0	3	0	0	2	0	0	0	1	0	0	0	0	0	0
LINC02407	1	0	0	1	0	0	0	0	1	0	0	1	0	0	0	0	0	1	1	0	1	0	2	0	0	2	0	0	1	0	0	0	0	0	0	0	0	2	3	1	0	1	3	2	0	1	4	4	1
FLJ21408	0	0	0	0	0	0	0	0	0	0	2	0	0	0	0	0	0	0	0	0	0	10	20	11	5	16	16	9	1	12	4	11	12	11	8	4	14	6	8	4	11	23	9	2	1	0	2	32	7
SLC25A25-AS1	0	0	0	0	0	0	0	0	0	0	0	0	0	0	0	0	0	0	0	0	0	1220	3405	3684	1808	3751	2727	3365	1524	3300	2747	2981	1760	268	2460	4191	3824	1453	2409	2425	3839	1049	1685	330	130	629	388	2336	532
AC119403.1	2996	7377	2253	1489	2395	4564	4888	649	6364	5369	1765	925	5819	4959	4741	2272	7662	723	2579	1808	5964	10	10	22	8	8	10	19	11	1	5	9	8	2	14	9	13	6	6	4	6	7	10	5	0	1	4	17	4
LINC01605	0	0	1	0	1	1	0	0	0	2	0	0	1	3	0	1	1	2	0	2	0	28	17	19	27	20	13	9	9	8	9	16	20	6	12	16	19	6	10	21	30	85	326	5	17	41	16	82	59
AC021237.1	97	97	169	155	161	74	142	61	157	243	95	54	163	109	215	179	60	83	138	258	201	0	1	0	0	0	0	0	1	0	0	0	0	0	0	0	0	0	0	0	0	0	0	0	0	0	0	0	0
AL391684.1	0	1	2	0	1	0	2	2	2	0	1	0	2	1	0	1	0	1	1	1	2	24	56	65	15	31	48	49	22	33	26	46	20	88	33	59	51	28	21	37	30	58	55	2	0	4	12	82	29
AC073167.1	183	124	192	141	248	229	307	88	187	265	97	85	253	389	152	205	73	162	134	192	285	1	0	1	0	0	0	0	0	0	0	0	0	1	0	1	1	0	0	0	1	0	0	0	0	0	0	0	0
AC009269.4	55	42	3	8	221	3	82	90	30	6	18	26	26	10	19	9	25	100	8	3	32	0	0	0	0	0	0	0	0	0	0	0	0	0	1	0	1	0	1	0	0	0	0	0	0	0	0	0	0
AC011257.1	3892	5381	4791	3158	6457	6052	5616	2705	4591	6853	3736	2120	6346	7285	4484	5026	3992	4067	4007	5948	5637	0	0	0	0	0	0	0	0	0	0	0	0	0	0	0	0	0	0	0	0	0	0	0	0	0	0	0	0
AC009506.1	0	0	0	0	1	0	0	0	0	0	0	0	1	0	0	1	0	0	0	0	0	159	199	127	162	163	127	175	65	163	200	151	95	184	69	211	186	136	155	145	159	89	49	16	3	35	59	179	115
AC011453.1	2	0	0	1	2	2	0	5	0	2	7	1	2	3	2	2	1	11	3	1	1	1	4	2	1	1	0	1	2	2	1	3	1	1	6	2	1	1	2	0	1	0	0	1	0	0	0	2	0
AP001025.3	34	8	61	50	35	17	28	40	18	27	59	40	36	16	31	17	11	20	67	60	30	0	3	3	6	0	0	0	0	4	1	1	0	0	0	1	1	0	3	0	0	3	5	0	0	0	1	2	0
AL591719.2	2378	3208	3027	2531	3115	3415	3475	3864	3696	3896	1826	1840	3943	3359	2838	2298	2972	2646	4442	1983	3284	0	0	0	0	0	0	0	0	2	0	0	1	0	0	0	0	0	0	0	0	0	0	0	0	0	0	0	0
AC091271.1	0	0	0	0	0	0	0	0	0	0	0	0	0	0	0	0	0	0	0	0	0	71	61	40	52	38	43	45	29	40	79	47	42	56	36	58	46	50	40	72	58	35	34	13	1	9	11	131	21
AC000061.1	0	0	0	1	0	0	0	0	0	0	0	0	0	0	0	0	0	0	0	0	0	0	11	4	2	3	2	4	7	1	1	1	3	1	4	6	2	0	1	1	4	22	11	1	1	0	0	8	3
FAM87B	0	0	0	0	0	0	0	0	0	0	0	0	0	0	0	0	0	1	0	0	0	7	22	12	7	9	9	18	2	8	14	6	8	13	6	27	13	6	3	3	15	3	4	2	0	0	3	6	3
AC004882.2	1902	2666	2614	1829	3521	2713	2789	2885	2068	3346	2070	1627	3394	2893	1916	1999	2000	2204	2638	1969	2723	0	0	0	0	0	0	0	0	0	0	0	0	0	0	0	0	0	0	0	0	0	0	0	0	0	0	0	0
ARRDC1-AS1	0	0	0	0	0	0	0	0	0	0	0	0	0	0	0	0	0	0	0	0	0	385	412	450	351	438	386	521	163	440	459	390	437	275	332	500	495	308	397	409	525	320	480	157	64	156	183	1172	246
AC129102.1	94	66	251	56	42	133	209	69	133	232	73	62	195	146	124	133	118	66	67	85	190	2	3	3	2	2	1	2	2	2	3	2	0	2	4	2	0	0	1	3	5	0	2	0	0	0	1	0	0
AC007485.1	19	8	12	8	12	6	14	6	11	7	9	7	13	10	7	23	6	9	1	18	15	4	4	2	6	6	5	3	4	4	10	2	1	1	3	8	5	8	7	10	1	2	0	0	0	0	2	6	14
AP001505.1	877	410	384	550	1203	263	331	1704	160	369	1447	1330	632	409	416	963	573	1381	923	360	555	1	3	0	1	2	1	0	1	1	2	0	0	3	4	1	1	1	0	0	0	1	4	0	0	0	1	1	2
AC093725.1	0	0	0	0	0	0	0	0	0	0	0	0	0	0	0	0	0	0	1	0	0	0	0	0	0	0	0	0	0	0	0	0	0	0	0	0	0	0	0	0	0	0	0	0	0	0	0	0	0
AC010680.2	0	0	0	0	0	0	0	0	0	0	0	0	0	0	0	0	0	0	0	0	0	8	15	10	7	13	13	6	6	16	11	16	19	13	11	20	15	24	7	5	14	10	18	2	0	1	0	11	9
AL513329.1	0	0	1	0	0	0	1	1	0	0	0	0	0	1	0	1	2	2	1	0	0	5	9	15	6	6	11	6	5	2	3	1	3	5	9	3	6	5	7	12	10	3	5	0	4	0	1	7	4
LINC01337	0	1	5	3	2	5	0	0	2	2	3	0	2	4	1	2	0	3	6	3	4	0	5	0	0	0	1	1	1	4	0	4	1	0	1	1	0	4	1	2	1	1	0	1	0	0	1	1	0
FAM182A	1	1	0	0	0	0	1	0	1	0	0	0	0	1	2	2	1	0	2	0	0	2	0	3	1	3	0	3	2	0	0	0	1	3	1	2	3	0	1	4	3	24	0	0	0	1	0	17	0
AC008050.1	1	1	0	0	2	0	0	2	1	0	0	0	0	0	0	1	1	1	0	1	0	5	15	1	4	1	1	5	0	2	3	7	4	2	1	2	2	6	4	0	2	1	1	0	0	0	0	0	0
RNF144A-AS1	0	0	0	3	2	1	1	0	2	2	1	0	1	1	0	4	0	1	0	4	0	14	13	10	9	13	7	4	3	16	17	12	7	16	16	10	6	9	10	2	14	4	15	11	0	4	4	3	5
AC079598.1	242	99	217	55	82	144	433	20	138	482	19	62	362	91	262	174	98	46	30	326	226	0	0	0	0	1	0	0	0	0	0	0	0	0	0	0	0	0	1	0	0	0	0	0	0	0	0	0	0
AL590652.1	0	0	0	0	0	0	0	0	0	0	0	0	0	0	1	0	0	0	0	0	0	11	9	7	5	9	1	6	1	6	1	10	2	2	12	9	5	0	7	2	6	3	6	2	0	0	3	20	5
AC114956.1	0	0	0	0	0	0	0	0	0	0	0	0	0	0	0	0	0	0	0	0	0	1	1	4	1	3	2	1	1	0	0	5	0	2	0	4	4	2	0	0	0	1	1	0	0	0	1	4	3
STX18-AS1	2	0	0	0	0	0	0	1	0	0	1	2	0	0	0	1	0	1	0	0	0	42	71	71	58	58	79	93	33	75	63	88	39	57	60	114	81	43	56	40	84	108	109	29	2	34	26	201	45
AL355916.2	2801	1992	1548	3245	6473	770	1109	5698	511	1996	6967	3926	2526	1357	1997	2822	2204	9176	4413	1931	3317	2	9	9	1	1	4	9	3	5	1	2	2	2	1	2	1	2	4	3	2	1	0	0	0	1	1	2	0
AL158211.4	8	2	12	9	9	3	9	6	11	16	6	2	6	6	4	7	9	10	3	6	11	0	1	2	0	1	1	0	1	2	4	2	3	0	1	1	2	3	2	3	1	0	1	1	0	1	1	0	0
LINC00960	1890	3130	2600	1989	3337	2199	3119	1361	2255	4046	2325	1041	3870	2929	2340	2387	2321	1664	1812	2033	2865	174	189	276	4	158	5	9	84	6	165	171	137	37	246	441	9	125	2	215	163	109	201	0	3	24	142	121	519
LINC00639	1071	1141	1513	969	1955	1254	1699	822	1140	1880	1148	861	1539	1582	1221	1344	1025	1317	964	1355	1609	31	30	30	30	26	20	32	13	31	37	28	51	14	28	39	24	27	20	7	33	8	26	2	1	1	3	3	7
AC093752.3	0	0	0	0	0	0	0	0	0	0	0	0	0	0	0	0	0	0	0	0	0	4	40	34	13	16	16	32	8	17	16	30	5	11	12	41	29	10	15	16	43	7	17	1	0	11	4	33	5
DIAPH3-AS2	0	1	0	0	0	0	0	0	0	0	0	0	0	0	1	0	0	0	0	0	0	0	0	0	0	1	0	0	0	0	0	0	0	0	0	0	0	0	0	0	0	0	0	0	0	0	0	0	0
FER1L6-AS2	2386	3683	2960	2858	3799	2728	3631	2866	3422	3965	2127	1634	4006	3494	2780	2902	2546	2289	3322	2238	3965	0	2	4	0	4	1	0	0	4	2	1	2	0	4	5	4	0	2	0	2	0	0	0	0	0	0	0	1
AC040977.1	692	666	1015	685	1659	940	1303	542	670	1306	870	491	1156	1128	710	1187	504	1034	595	1111	1139	21	45	69	35	61	43	69	16	58	59	42	30	62	49	75	37	40	43	75	35	23	19	9	23	7	20	34	24
AC068620.3	0	0	0	0	0	0	0	0	0	0	0	0	0	0	0	0	0	0	0	0	0	3	7	10	1	6	4	10	4	4	8	5	0	6	7	7	7	7	4	3	10	6	8	1	0	0	2	16	0
BX649601.1	0	1	2	0	2	0	1	0	1	1	0	0	2	2	0	0	0	0	0	1	0	3	8	4	3	5	3	3	2	1	7	5	4	2	4	5	5	5	1	7	5	8	3	0	0	0	0	3	1
AC106772.1	0	0	0	1	0	1	1	0	0	0	0	0	0	0	0	0	0	0	0	0	0	0	0	3	0	0	0	1	0	1	0	0	0	0	1	0	0	0	0	0	3	3	13	0	0	0	0	5	1
AL596247.1	0	0	0	0	0	0	0	0	0	0	0	0	0	0	0	0	0	0	0	0	0	1	3	1	0	0	0	6	1	1	0	0	0	0	1	0	0	2	1	2	1	0	4	2	0	0	2	9	3
C9orf139	308	326	372	350	481	259	376	241	213	462	358	250	417	417	325	409	564	458	318	650	336	8	13	32	9	20	33	32	5	31	8	27	29	9	16	23	29	22	13	13	33	4	17	3	0	7	14	13	7
AC011451.1	0	1	2	2	0	2	0	2	0	1	2	1	2	3	1	0	2	4	2	0	0	16	17	23	29	17	11	40	12	39	21	16	21	40	15	35	27	35	22	16	20	14	31	2	0	2	5	27	51
ZNF674-AS1	0	0	0	0	0	0	0	0	0	0	0	0	0	0	0	0	0	0	0	0	0	264	148	218	101	115	77	132	71	126	153	81	118	82	145	143	176	215	81	89	377	181	159	58	56	23	69	217	51
SATB2-AS1	1	4	1	3	4	2	5	5	2	2	3	1	4	4	4	5	2	2	8	2	6	1121	2152	1449	1354	1707	1522	1637	777	1548	1472	1704	970	194	886	2768	1946	867	1352	86	1762	294	699	39	35	107	153	15	24
AP002770.1	137	192	188	222	154	182	249	182	172	229	106	160	262	175	202	222	131	210	219	123	225	0	3	1	0	0	1	0	0	1	4	3	1	1	0	2	1	1	1	1	0	0	0	0	0	1	0	0	1
AC145146.2	0	0	0	0	0	0	0	0	0	0	0	0	0	0	0	0	0	0	1	0	0	0	0	0	0	0	0	0	0	0	0	0	0	0	1	2	0	0	0	0	0	0	0	0	0	0	0	1	0
LINC00404	0	0	0	0	0	1	0	0	0	0	0	0	0	0	0	1	0	0	0	0	2	0	1	2	0	2	1	4	0	0	0	2	2	7	0	2	0	5	2	2	0	0	0	0	0	4	0	6	0
AP002754.1	2040	5645	2884	2242	2907	4783	5257	917	3545	6416	1537	1331	5472	3536	4022	2246	4114	1679	1997	1574	4865	7	14	28	42	10	7	9	7	17	20	15	11	5	8	34	14	9	11	16	14	11	0	0	0	0	1	4	8
AC005339.1	62	114	106	124	98	93	190	84	147	127	56	42	131	147	110	114	80	68	133	28	158	0	0	0	0	0	0	0	0	0	0	0	0	0	0	0	0	0	0	0	0	0	0	0	0	0	0	0	0
AC009656.1	0	0	0	0	0	0	0	0	0	0	0	0	0	0	0	0	0	0	0	0	0	0	0	2	0	1	0	0	0	0	0	0	0	0	0	0	2	0	0	0	0	0	0	0	0	0	0	0	0
MGAT3-AS1	1	0	0	0	1	0	0	0	0	0	0	0	0	0	0	0	0	0	0	0	0	0	10	5	15	3	6	12	0	8	7	15	5	3	3	7	12	1	4	95	19	2	0	0	0	0	5	6	5
AL353997.6	3223	5988	3887	3527	4370	3544	5182	4306	5299	5862	3291	2976	5670	4252	4765	3371	5725	3501	5099	3057	4396	0	0	0	0	0	0	0	0	0	0	0	0	0	0	0	0	0	0	0	0	0	0	0	0	0	0	0	0
AP003390.1	1	0	0	0	0	0	0	0	0	0	1	1	0	1	0	0	0	0	0	1	0	26	14	20	16	12	5	19	4	15	16	12	10	12	6	23	15	12	16	16	19	7	60	3	5	0	6	73	25
FOXN3-AS1	0	0	0	0	0	0	0	0	0	0	0	0	0	0	0	0	0	0	0	0	0	101	72	74	72	86	82	73	42	98	95	65	82	75	40	65	90	59	71	70	69	49	99	26	22	11	42	29	21
SMIM10L2B-AS1	148	111	74	23	178	78	97	375	52	90	220	191	106	60	111	59	115	199	178	123	185	0	1	1	0	0	0	0	0	0	0	0	0	0	0	1	0	0	0	0	0	0	0	0	0	0	0	0	0
NIFK-AS1	0	0	0	1	0	0	0	0	0	0	1	0	0	1	0	0	0	0	0	0	0	142	184	132	144	172	124	217	82	223	163	175	159	327	73	266	145	207	127	171	131	73	104	46	16	11	44	354	160
LINC00403	0	0	0	0	0	0	0	0	0	0	0	0	0	0	0	0	0	0	0	0	0	0	6	3	0	6	2	5	0	0	4	2	4	15	1	3	1	7	0	1	0	0	0	0	0	0	0	3	0
AC022098.2	0	0	0	0	0	1	0	2	0	0	0	0	0	0	0	0	0	0	0	1	1	0	0	1	0	1	0	3	1	18	1	0	0	0	0	0	1	0	1	2	0	3	0	0	0	0	0	0	0
AC009133.2	2348	5123	3921	2470	4135	6334	4496	2602	3385	5478	2568	1886	5824	4905	3563	3697	4082	3607	2810	4719	4062	0	0	0	0	0	1	0	0	0	0	0	0	0	0	0	0	0	0	0	0	0	0	3	1	1	1	0	0
AC024022.1	801	1049	1100	1059	1454	807	1292	791	748	2042	877	534	1257	1126	721	1209	584	1120	1306	951	1209	0	0	1	0	1	0	0	0	1	0	0	1	0	2	3	1	1	0	0	0	0	0	0	0	0	0	0	0
AC095060.1	0	0	0	1	1	0	0	0	0	0	0	0	0	0	0	0	0	0	0	0	0	0	0	2	0	1	0	0	0	2	0	0	0	1	0	1	1	0	2	0	0	0	2	0	0	0	0	0	0
AC244035.3	1	0	0	0	1	0	0	0	0	0	0	0	0	0	0	1	0	1	0	2	1	1	0	0	0	0	0	0	0	0	0	0	0	0	0	0	0	0	0	0	0	1	0	0	0	0	0	0	0
AC010425.1	0	0	3	2	1	0	1	0	1	0	2	0	0	0	1	2	0	1	0	0	0	0	0	0	0	0	0	2	0	0	0	0	1	3	0	0	2	1	0	0	1	0	0	0	0	0	0	0	0
AC007952.5	0	0	0	0	3	0	0	3	0	0	0	1	0	1	0	2	1	1	0	0	0	0	0	0	0	0	0	0	0	0	0	0	0	0	0	0	0	0	0	0	0	0	0	0	0	0	0	0	0
AC096637.2	0	1	0	0	1	2	0	0	0	1	0	0	2	0	0	0	0	1	0	0	1	0	1	1	0	1	0	1	1	1	0	1	2	0	0	0	0	0	0	8	0	0	1	1	1	1	0	18	0
EGFR-AS1	0	0	0	0	0	0	0	0	0	0	0	0	0	0	0	0	0	0	0	0	0	5	24	18	9	9	6	16	6	15	14	12	8	1	9	16	16	8	3	802	22	4	2	0	0	0	0	9	1
TRHDE-AS1	13	34	54	12	16	14	22	13	11	15	4	5	36	9	12	21	15	13	11	7	16	3	14	13	6	23	4	32	2	26	14	15	16	28	8	19	2	27	8	20	10	0	0	0	0	0	0	0	0
AC097532.2	3299	1897	2912	2304	5698	1802	2209	5635	1333	2480	5987	3047	3302	2899	2513	5879	2294	4076	2724	2721	3004	0	4	1	0	0	0	2	2	0	0	1	0	3	0	2	4	2	3	2	3	4	4	0	0	0	0	2	0
AC021074.3	0	2	7	11	5	5	8	3	6	7	3	4	3	12	5	7	0	8	2	12	11	4	1	0	2	6	0	0	1	1	1	2	1	2	3	8	2	1	6	0	0	1	1	1	0	0	0	1	0
AC106047.1	515	237	256	292	492	187	224	515	188	306	961	561	466	274	391	433	401	660	440	262	372	8	3	7	11	6	7	5	3	8	9	0	1	1	2	17	12	12	9	10	9	32	2	4	13	4	0	10	2
AC005301.1	1355	2936	2139	1174	2579	2072	2192	947	1846	2772	1809	962	2833	2723	1662	1726	2725	1858	1381	1642	1330	0	0	0	0	0	0	0	0	0	0	0	0	0	0	0	0	0	0	0	0	0	0	0	0	0	0	0	0
AC009542.1	0	0	1	0	0	0	1	0	0	2	0	0	1	0	0	1	0	0	0	0	0	2	1	6	0	0	0	2	0	0	1	1	1	0	1	5	0	4	2	4	2	0	3	0	0	0	0	2	2
AC133565.1	17	834	31	4	6	18	35	4	30	51	26	5	35	331	36	35	38	24	5	260	25	0	0	1	0	0	0	0	0	0	0	0	0	0	0	0	0	0	0	0	0	0	0	0	0	0	0	0	0
AL355314.2	141	92	62	121	221	46	72	171	34	102	264	335	106	62	119	138	110	301	143	108	158	0	0	0	0	0	0	0	0	0	0	0	0	0	0	0	0	0	0	0	0	0	0	0	0	0	0	0	0
AC006064.2	1396	2367	1412	1394	1845	1605	1942	1520	1821	2053	1410	1102	2330	1883	1667	1440	1870	1622	2059	1323	1919	53	41	30	22	31	28	50	15	55	35	34	21	16	17	66	42	36	36	42	27	29	6	2	0	2	7	41	10
LINC01648	1	0	1	1	2	0	0	0	0	0	0	1	0	1	1	0	0	0	2	0	1	33	14	1	1	1	5	5	1	10	4	8	5	4	3	5	2	0	6	1	1	8	29	2	2	0	3	7	32
AC007381.1	0	0	0	0	2	0	0	1	0	0	0	0	3	0	1	3	1	0	0	3	0	0	0	1	1	0	4	2	0	5	1	1	2	0	1	4	4	2	4	0	4	0	0	0	0	0	0	0	0
AL359921.2	0	0	0	0	0	0	0	0	0	0	0	0	0	0	0	0	0	0	0	0	0	8	32	30	18	16	22	35	10	27	27	30	25	22	17	27	39	27	28	23	42	30	5	4	2	15	6	28	23
AL162591.1	6009	12212	6965	5000	8422	9395	9834	4523	6266	10776	7188	4812	12117	9004	7639	7183	9213	6041	5334	5747	9086	24	8	10	12	14	19	13	8	24	13	10	8	10	5	19	15	7	18	17	9	2	0	0	0	0	1	3	0
AC097478.2	0	1	0	0	0	1	0	0	0	2	0	0	0	2	0	1	0	0	0	0	0	0	1	0	0	0	0	0	0	1	0	0	0	1	0	0	0	0	0	1	0	10	0	2	0	0	0	0	6
AC018462.1	0	0	0	0	0	0	0	0	0	0	0	0	0	0	0	0	0	0	0	0	0	3	5	5	1	6	0	2	4	3	3	1	3	8	1	8	5	1	6	5	3	1	0	0	0	0	1	3	2
AC121320.1	2494	3352	3605	2456	3638	2852	4265	2182	3037	4249	3181	2258	4295	3390	3423	3174	2750	3139	2642	1859	4283	0	0	0	0	0	0	0	0	0	0	0	0	0	1	0	0	0	0	0	0	0	0	0	0	0	0	0	0
AGBL5-AS1	0	0	0	0	0	0	0	0	0	1	0	0	0	0	0	1	0	0	0	0	0	3	2	3	3	2	0	3	1	5	7	2	0	2	3	6	1	1	3	6	4	1	1	1	0	1	0	2	4
LINC01007	0	0	0	0	0	1	0	0	0	0	0	0	0	0	0	0	0	0	0	0	0	0	0	0	0	0	0	0	0	0	0	0	0	0	0	1	0	0	0	0	1	1	0	0	0	1	0	0	0
AC062021.1	1084	777	1019	862	709	1405	1301	990	960	1285	467	654	1382	1018	1109	722	1264	1810	1048	430	1167	0	0	0	0	0	0	0	0	0	0	0	0	0	0	0	0	0	0	0	0	0	0	0	0	0	0	0	0
AC024619.1	954	5758	2473	1035	2498	3332	3023	973	3322	5047	2033	895	3946	3488	3236	1136	5463	1196	1301	2237	2542	0	0	0	0	0	0	0	0	0	0	0	0	2	0	0	0	0	0	0	0	0	0	0	0	0	0	0	0
AP002478.2	0	0	0	1	0	0	0	0	0	0	0	1	2	0	0	0	0	1	1	1	0	0	1	0	0	0	0	0	0	0	0	0	0	0	0	0	0	0	0	0	0	0	0	0	0	0	0	1	0
AP000282.2	282	301	273	296	243	295	650	271	410	525	345	160	482	715	366	404	244	281	427	343	392	1	0	0	0	0	0	0	0	0	0	0	2	2	0	0	0	0	0	0	0	0	0	0	0	0	0	0	0
AC005476.2	16	22	37	7	5	19	20	31	6	22	6	16	20	7	16	5	10	27	6	0	14	81	35	46	44	43	39	33	25	43	45	50	50	20	17	54	46	37	37	23	32	61	17	7	0	7	5	116	30
AC090772.1	0	0	0	0	0	0	0	0	0	0	1	1	0	0	0	0	0	0	1	0	0	0	1	0	1	3	0	6	1	3	0	5	0	2	1	5	0	6	3	1	0	1	0	0	0	1	1	2	2
NEAT1	634	1163	849	600	943	1168	1018	787	936	1187	588	555	1179	943	798	778	931	872	794	772	886	2279	16167	31665	7979	11620	14669	18857	8378	13075	4950	14296	9880	3812	25507	15643	14106	7897	9043	28708	22508	5583	15744	4947	1327	2742	4743	21760	4192
AC011466.2	22	31	62	44	71	20	41	27	32	45	62	52	34	41	28	62	25	50	20	46	65	0	0	0	0	0	0	0	0	0	0	0	1	1	0	0	1	0	0	0	1	0	1	0	0	0	1	6	0
AC012184.1	498	541	581	544	826	556	819	642	527	703	365	303	796	669	444	516	349	471	671	529	606	0	0	0	0	0	0	0	0	0	0	0	0	0	0	0	0	0	0	0	0	0	0	0	0	0	0	0	0
AP006216.1	7	5	9	9	8	5	3	7	10	4	4	6	8	15	8	11	4	9	14	14	12	3	5	0	3	2	2	2	0	1	1	1	1	0	1	2	2	2	1	3	1	1	4	0	0	0	0	6	0
AC046143.1	84	179	169	150	140	280	102	843	102	144	100	107	245	92	104	193	143	300	216	79	120	90	82	97	103	106	68	110	54	140	98	74	105	18	56	96	126	68	64	25	115	40	48	42	2	32	35	28	43
LINC00592	0	0	0	0	0	0	0	0	0	0	0	0	1	0	1	1	0	1	0	0	1	1	1	0	0	0	0	0	0	0	0	0	0	0	0	0	0	0	0	0	0	0	4	8	0	0	2	5	3
AP000525.1	235	216	160	305	155	96	195	87	191	278	188	147	195	222	224	253	158	81	184	123	326	0	2	0	1	1	0	0	1	0	1	2	1	1	1	0	1	0	0	0	2	0	5	1	0	3	0	12	2
AC010336.5	2455	2214	3537	2571	5015	3303	3536	3487	2337	3775	2969	1716	3728	3789	2397	3217	1606	3105	2903	2824	2988	1	0	1	0	0	0	0	0	0	10	0	3	19	0	0	0	7	0	3	1	0	0	0	0	0	2	0	1
AL034397.3	448	569	740	466	602	431	756	449	517	735	468	331	537	528	500	549	579	452	584	453	758	100	24	191	34	68	73	28	44	67	19	114	56	19	72	122	71	94	68	42	31	1	15	21	2	0	49	7	20
AC087645.2	0	0	0	0	0	0	0	0	0	0	0	0	0	0	0	0	0	0	0	0	0	2	10	7	5	3	12	3	4	10	6	7	7	11	2	2	2	7	2	0	2	1	3	4	0	0	4	11	6
AC007879.2	961	625	907	654	1385	399	767	561	356	926	1361	1177	899	1190	1087	1475	543	2301	449	1110	1042	0	1	0	0	0	0	0	0	0	0	1	0	4	1	0	2	0	0	0	0	0	0	0	0	0	0	1	0
NR2F2-AS1	4662	13491	7294	3298	7075	12394	10140	2154	5949	13630	6470	2594	12105	11353	8911	6773	13869	4718	3015	6656	9817	28	55	41	26	27	14	65	12	32	18	16	28	93	19	23	15	52	19	26	21	5	11	1	1	1	8	42	3
SNHG10	0	6	0	1	2	1	1	0	0	4	0	0	1	2	4	0	8	0	3	1	0	205	185	159	93	106	145	159	53	88	88	106	153	59	53	151	140	107	93	113	145	319	404	88	14	19	86	205	81
AC008759.3	1	0	2	1	0	0	2	1	0	0	3	0	0	0	2	1	0	2	8	1	3	0	6	4	0	0	0	12	0	1	0	0	3	3	1	2	0	1	3	3	1	0	0	0	0	0	0	0	0
AC078923.1	2	8	9	3	6	2	4	8	3	4	6	8	4	1	5	5	10	5	3	6	6	1	1	0	1	0	0	2	0	0	1	0	1	0	0	1	0	0	0	1	0	7	8	0	0	1	6	12	2
AC114741.1	268	660	694	606	344	412	625	433	386	543	224	173	669	386	319	433	542	204	570	268	466	0	0	0	0	0	0	0	0	0	0	0	0	0	0	0	0	0	0	0	0	0	0	0	0	0	0	0	0
DIRC3-AS1	10	4	19	7	8	3	5	4	7	16	11	3	12	15	11	17	4	17	1	7	22	0	4	0	0	1	2	2	0	2	0	0	0	2	0	0	2	2	0	0	0	0	0	0	0	0	0	0	0
AC022272.1	0	1	0	0	0	0	0	0	1	0	0	0	0	0	0	0	1	1	0	0	0	1	7	4	0	3	2	11	5	6	2	4	4	3	5	7	2	2	1	2	3	2	4	0	0	0	2	7	0
AC026458.2	25	11	15	10	26	18	14	10	14	28	10	10	14	16	15	16	11	15	8	18	21	0	0	0	0	0	1	0	0	0	0	1	0	0	0	0	1	1	0	1	2	0	0	0	0	0	0	0	0
AC010186.4	31	87	49	36	53	944	39	609	128	185	29	47	271	289	91	45	219	529	132	93	89	0	0	0	0	1	10	1	2	0	1	1	0	0	0	1	0	1	2	1	0	0	0	0	0	0	0	0	0
LINC02302	0	0	0	0	0	0	0	0	0	0	0	0	0	0	0	0	0	0	0	0	0	3	1	0	0	1	0	1	1	1	1	0	3	0	0	2	0	4	1	0	0	0	0	0	0	0	0	1	0
LINC01657	5	10	6	2	9	6	7	12	7	8	2	7	13	14	12	2	7	5	6	2	11	0	0	0	0	0	0	1	0	0	0	0	0	0	0	0	0	0	0	0	0	0	0	0	0	0	0	0	0
AP000943.3	9	0	7	5	14	10	28	1	7	31	1	8	11	7	18	12	5	9	3	11	22	0	0	1	0	0	0	0	0	1	1	0	0	1	0	0	0	0	0	0	1	0	0	0	0	0	0	0	0
AC023830.3	0	0	0	0	0	0	0	0	0	0	0	0	0	0	0	0	0	0	0	0	0	1	1	1	1	2	1	3	0	0	1	2	2	3	3	1	0	1	2	6	1	0	1	0	0	0	2	0	0
AC090517.2	0	0	0	0	0	0	0	1	0	0	0	1	0	0	0	0	0	0	0	0	0	11	12	13	9	9	6	16	7	18	10	3	10	7	3	19	13	9	11	14	17	13	8	12	0	2	8	13	15
AC003965.1	0	1	0	0	0	1	0	0	0	0	0	0	0	0	0	0	0	0	0	0	0	6	4	6	1	9	6	6	5	3	8	6	3	6	7	10	10	9	5	2	12	12	3	0	0	1	2	31	5
LINC01004	1608	1423	2374	1142	2895	2653	3045	1363	1486	3361	1259	1111	3282	2840	1834	2125	1414	1954	1313	1525	2117	59	112	123	51	132	93	176	137	105	69	95	62	24	154	136	150	57	84	37	88	74	109	9	1	3	10	115	43
AC008277.1	0	0	2	1	4	2	0	6	2	2	1	0	1	1	0	1	1	1	0	1	4	0	2	0	0	1	1	2	1	0	0	0	0	0	0	0	1	2	0	0	2	1	0	0	0	0	0	1	1
AL117336.3	7	8	6	7	13	9	7	6	5	2	5	13	5	6	9	13	6	13	11	5	7	25	28	24	42	28	53	47	12	29	17	27	28	67	13	36	29	34	52	53	39	20	21	9	4	12	7	134	22
AL139384.1	0	0	0	0	0	0	0	0	0	0	0	0	0	1	1	1	0	0	0	0	0	26	30	36	27	47	43	29	15	54	23	36	33	53	17	51	47	23	31	53	24	123	25	12	17	12	14	75	86
AC245595.1	0	0	0	0	0	0	1	0	0	0	0	0	0	1	0	0	0	0	0	0	0	51	31	17	20	28	16	36	7	29	35	18	15	34	7	23	19	27	36	39	10	15	36	1	0	1	4	12	57
AL645608.5	2	4	3	1	4	3	2	1	2	5	3	0	3	2	2	3	4	2	1	2	3	0	0	0	0	0	0	0	0	0	0	0	0	0	0	0	0	0	0	0	0	0	0	0	0	0	0	2	0
AC092145.1	0	0	0	0	0	0	0	0	0	0	0	0	0	0	0	0	0	0	0	0	0	3	3	10	4	1	6	20	2	6	4	6	2	1	3	3	10	1	8	2	4	1	3	0	0	0	0	11	1
AC239585.2	0	0	0	0	0	0	0	0	0	0	0	0	0	0	1	2	1	1	0	0	0	0	0	0	0	0	0	0	0	0	0	0	0	0	0	0	0	0	0	0	0	0	0	0	0	0	0	0	0
AC055758.2	1744	5517	2061	1637	3063	5984	4891	1784	3946	5357	1812	1583	6813	3750	4207	1705	4682	2038	1941	1914	3785	0	0	0	0	0	0	0	0	0	0	0	0	0	0	0	0	0	0	0	0	0	0	0	0	0	0	0	0
FAM74A7	30	30	73	22	28	67	25	56	16	32	25	8	58	29	21	36	31	61	25	24	29	0	0	0	0	0	0	0	0	0	0	0	0	0	0	0	0	2	0	0	0	0	0	0	0	0	0	0	0
TFAP2A-AS1	0	0	0	0	0	0	0	0	0	0	0	0	0	0	0	0	0	0	0	0	0	0	3	2	3	3	8	11	0	1	3	4	3	4	1	4	6	3	9	4	0	17	14	19	4	2	1	248	17
HOXB-AS4	1246	1273	1483	1610	1819	1331	1916	1616	1780	2043	1106	1042	1773	1566	1776	1272	1179	1504	2033	1244	1810	140	561	300	238	424	172	340	166	380	281	241	216	39	225	399	306	155	218	106	321	258	517	49	6	35	25	255	130
LEF1-AS1	1	0	1	2	1	0	0	0	0	1	0	0	1	0	1	3	0	1	0	2	2	3	3	1	1	3	5	1	0	9	2	6	3	2	3	9	2	10	1	0	4	14	12	3	4	11	2	6	4
AC108136.1	155	265	276	337	160	139	197	187	218	708	159	234	412	138	226	269	138	139	220	77	231	1	1	0	0	0	0	0	0	0	0	1	1	0	0	0	0	0	0	0	0	0	1	1	0	0	1	35	1
AC087321.1	15	20	16	18	25	13	17	15	9	21	19	12	18	16	16	23	10	16	26	14	21	0	0	0	0	0	0	0	0	0	0	1	0	0	0	0	0	0	0	0	0	0	0	0	0	0	0	0	0
AC099687.1	555	1146	745	716	738	948	1419	376	1046	1337	353	413	1074	948	1046	304	1415	219	699	534	1041	0	0	0	0	0	0	3	0	0	0	0	0	1	2	0	0	0	0	0	0	0	0	0	0	0	0	0	0
KMT2E-AS1	0	0	0	0	0	0	0	0	0	0	0	0	0	0	0	0	0	0	0	0	0	170	113	122	106	132	104	116	43	121	103	96	112	40	106	122	104	83	75	134	104	138	135	60	78	17	32	243	52
AL133492.1	6096	8464	9567	6171	11686	8557	9046	5780	8167	11255	5759	4183	10457	10258	7676	7085	6912	6811	6927	7130	8539	1	1	0	0	0	0	0	0	0	0	0	1	0	0	0	0	0	0	0	1	1	0	0	0	0	0	0	0
AC010998.1	1226	1302	1216	1096	1770	1608	2376	902	1367	2094	1248	909	1999	1529	1559	1613	924	1097	1179	1631	2239	0	0	0	0	0	0	0	0	0	0	0	0	0	0	0	0	0	0	0	0	0	0	0	0	0	1	1	0
LINC02470	0	0	0	1	0	0	0	0	1	1	1	0	1	0	1	0	0	0	1	0	1	0	0	0	0	0	0	2	1	0	0	2	2	1	0	0	0	0	1	1	0	0	0	0	0	0	0	3	0
AC004241.3	0	0	2	2	2	0	0	0	0	1	0	1	1	0	0	2	0	2	0	4	1	20	8	12	7	8	15	17	9	12	11	5	19	3	8	11	8	11	7	12	19	20	18	5	0	0	14	20	15
AL731568.1	0	0	0	0	0	0	0	0	0	0	0	0	0	0	0	0	0	0	0	0	0	0	0	0	0	1	0	0	0	0	0	0	0	0	0	1	0	0	0	0	0	1	1	1	0	0	0	0	0
AC107023.1	228	265	492	437	455	235	459	321	298	433	287	185	351	322	296	395	168	301	396	286	414	0	0	0	0	0	0	0	0	0	0	0	0	0	0	0	0	0	0	0	0	0	0	0	0	0	0	0	0
AC015660.4	0	0	0	0	0	0	0	0	0	0	0	0	0	0	0	0	0	0	0	0	0	0	2	4	0	0	2	0	1	0	3	4	0	1	0	3	3	2	1	6	4	1	2	0	0	1	0	5	0
LINC02454	1375	1238	2317	1656	3767	2342	2368	2506	1587	2456	1107	1048	2598	2869	1271	1671	893	3225	1847	1146	1533	5	0	2	1	1	0	4	1	0	2	1	1	4	2	5	1	3	3	0	0	2	1	0	0	0	1	1	1
LINC02416	2	3	2	4	0	2	4	0	1	1	2	0	3	0	3	3	0	3	0	3	3	2	0	0	2	0	5	3	0	2	0	4	1	1	1	0	4	0	0	0	2	0	3	0	0	1	0	8	0
LINC02242	15	9	4	12	13	0	7	24	7	12	5	11	3	6	7	12	8	14	10	3	11	1	0	0	1	0	0	0	0	0	0	0	1	0	0	1	0	0	0	1	1	1	0	0	0	0	0	0	0
AP003392.4	422	557	265	453	1184	338	410	576	198	532	625	614	685	318	584	679	153	1026	264	836	1065	28	79	46	23	37	46	52	6	57	25	57	67	29	27	99	68	46	38	86	57	12	38	8	3	5	21	208	11
AC087588.2	0	0	0	0	1	0	0	0	0	0	0	0	1	1	0	0	0	0	0	0	1	5	14	22	7	10	10	20	9	10	5	3	13	1	18	12	10	13	5	3	13	5	26	2	0	5	7	23	13
AL359878.2	1440	808	891	1014	1260	832	824	1069	614	1471	1183	1220	1251	688	830	1078	622	1889	700	690	1345	0	2	1	0	0	1	1	1	0	0	0	0	0	0	1	1	0	1	0	1	1	2	0	0	0	0	0	0
AL031722.1	464	1292	1852	800	802	395	962	257	387	777	619	247	552	1156	642	944	584	474	756	457	1149	11	7	3	9	6	5	7	4	9	4	8	2	5	11	16	7	7	10	16	9	7	1	0	1	0	1	2	2
PACERR	1569	3217	2202	2102	2752	2276	2902	1168	2009	3133	1681	1083	3387	2521	2430	1929	2653	1610	1789	1921	2972	0	3	2	1	2	0	0	2	1	0	4	7	11	1	3	6	0	0	0	1	0	1	2	1	0	2	60	2
AL357054.4	0	1	0	0	0	0	0	1	0	0	1	1	0	1	0	0	0	1	1	0	1	95	84	123	141	144	98	487	57	139	105	77	88	774	133	138	93	378	68	72	77	13	7	8	3	3	19	16	1
AC105020.2	1476	3414	2630	2027	2325	2414	3393	1231	2431	4405	1426	1117	3465	2661	2495	1681	3237	1132	2014	1441	2996	0	1	1	0	0	1	0	0	1	0	3	0	0	1	1	0	0	0	0	3	5	1	0	0	0	0	0	0
AC006296.2	1	0	1	1	1	0	1	0	1	0	1	0	0	0	0	0	0	0	2	0	0	0	0	0	0	0	0	0	0	0	0	2	0	0	0	0	0	0	0	0	0	0	0	0	0	0	0	0	0
AC011478.1	0	0	0	0	3	0	0	0	0	0	0	0	0	1	0	0	0	0	0	0	0	0	0	0	0	0	0	0	0	0	0	0	0	0	0	0	0	0	0	0	0	0	0	0	0	0	0	0	0
MIR548XHG	2	22	1	3	0	27	25	0	30	6	0	14	290	3	86	0	32	0	4	2	133	0	0	0	0	0	0	0	0	0	0	0	0	0	0	0	0	0	0	0	0	0	0	0	0	0	0	0	0
LINC02307	3	1	3	1	8	1	4	0	1	3	0	0	3	1	1	1	0	2	2	0	2	0	0	0	0	0	0	0	0	0	0	0	0	1	0	0	0	0	0	0	0	0	0	0	0	0	0	0	0
AL390037.1	0	0	0	0	0	0	0	0	0	0	0	0	0	0	0	0	0	0	0	0	0	0	1	1	0	0	2	4	0	0	1	3	0	0	1	0	0	1	0	2	1	0	1	0	0	0	0	0	0
LINC02164	507	629	728	676	840	726	757	928	739	916	464	444	868	829	694	596	491	778	1095	587	785	0	0	0	0	0	0	0	0	0	0	0	0	0	0	0	0	0	0	0	0	0	0	0	0	0	0	0	1
AC145124.1	0	0	0	0	0	0	0	0	0	0	0	0	0	0	0	0	0	0	0	0	0	10	13	18	18	19	15	20	4	36	31	9	24	52	12	21	24	8	21	12	20	6	7	1	0	1	7	2	2
LINC01479	0	0	0	0	0	0	0	0	0	0	1	0	0	1	0	0	0	0	0	0	0	0	1	1	1	0	2	1	0	3	0	4	0	0	1	3	0	0	3	2	3	4	0	0	0	0	0	4	1
AC108673.3	0	0	0	0	0	0	0	0	0	0	2	0	1	0	1	0	0	0	0	0	0	10	17	21	9	18	16	28	14	31	29	22	13	15	18	23	20	37	19	28	25	20	31	4	0	20	7	12	38
LINC01090	38	34	37	42	89	10	37	44	26	24	45	23	32	31	37	36	26	73	44	20	38	0	3	0	2	2	0	0	0	0	0	1	0	1	2	0	3	0	0	5	1	0	0	1	0	0	0	0	0
PHACTR2-AS1	1045	914	1192	989	1229	618	699	1267	599	890	915	937	1203	1303	781	896	775	1017	1126	1127	1066	0	2	3	0	0	1	0	0	1	2	0	0	0	1	2	0	0	1	3	0	2	0	0	0	3	0	0	0
AC243965.1	0	0	0	0	0	0	1	2	1	6	0	0	0	3	1	1	1	1	1	0	2	0	1	1	0	0	0	0	0	0	0	0	0	0	0	0	0	0	0	0	0	1	0	0	0	0	0	1	0
AC009948.4	672	631	1733	396	621	728	885	518	521	1056	430	255	721	740	525	775	443	527	805	573	656	7	9	9	12	9	8	10	6	12	11	14	11	7	11	12	11	13	11	8	7	9	14	2	0	2	1	12	8
AC147067.2	0	0	2	1	0	0	0	0	0	0	0	0	0	0	0	0	0	0	0	0	0	1	11	3	1	5	2	8	1	8	2	2	5	6	5	6	2	3	4	6	8	0	5	1	0	0	0	0	2
AC138028.1	0	1	4	4	19	6	6	3	4	11	1	1	1	8	11	4	2	6	4	0	7	1	2	4	1	2	2	10	0	0	5	1	1	3	5	4	5	3	0	3	3	1	8	1	0	0	0	5	0
AL512598.1	0	0	0	0	0	0	0	0	0	0	0	0	0	0	0	0	0	0	0	0	0	23	12	10	6	6	8	8	5	9	10	5	12	11	4	10	7	20	3	7	16	13	22	6	0	0	2	70	16
AC007405.3	1	0	0	0	0	0	0	0	2	0	0	0	0	0	0	0	0	0	0	0	0	13	32	20	35	22	22	23	10	23	29	18	25	52	17	22	18	29	19	19	13	206	60	25	13	25	21	239	229
AC027097.1	0	0	0	0	0	0	0	0	0	0	0	0	0	0	0	0	0	0	0	0	0	77	75	79	67	57	83	83	34	138	61	79	66	42	44	76	95	75	77	51	78	57	44	16	2	6	19	22	38
ZBED3-AS1	0	2	1	0	0	0	0	0	0	0	0	1	1	0	1	0	0	0	0	0	2	18	39	27	11	12	14	15	11	24	26	22	22	22	11	27	17	18	24	13	18	4	30	8	1	5	5	19	10
AL359397.2	74	233	118	188	144	73	101	34	219	201	79	57	187	212	147	169	414	93	141	75	176	0	0	0	0	0	0	0	0	0	0	0	0	0	0	0	0	0	0	0	0	0	0	0	0	0	0	0	0
OR2A1-AS1	3	4	12	7	13	2	1	10	2	7	9	7	5	3	5	6	1	10	14	3	4	94	289	198	201	53	164	272	80	164	152	86	152	50	131	109	313	101	105	435	108	245	60	15	0	21	23	402	41
AC008403.3	0	1	0	1	1	0	0	0	0	0	0	0	1	1	0	0	0	0	0	0	0	1	1	0	0	2	0	0	0	1	0	1	2	0	0	2	0	0	0	0	0	4	1	1	0	1	0	3	1
ALDH1L1-AS1	169	165	267	326	262	146	312	228	234	356	104	96	246	346	257	244	87	79	399	256	308	0	0	0	0	1	0	1	0	1	0	2	0	0	0	3	1	0	0	0	1	0	0	0	0	0	0	1	0
AC016766.1	1568	6489	2068	1444	1847	2820	2566	728	2756	4948	1786	829	4443	3568	3430	1399	4257	834	1478	1246	4096	1	0	1	0	0	0	0	1	0	0	0	0	0	1	0	0	0	0	0	0	0	0	0	0	0	0	0	0
AC111188.1	0	0	0	0	0	0	0	2	0	0	1	0	0	1	0	1	1	1	1	0	1	0	5	8	2	4	2	4	0	10	1	12	7	10	8	2	8	9	5	7	3	1	1	1	0	0	1	2	0
AC008149.1	498	557	817	641	950	482	783	592	460	833	730	490	716	681	521	631	456	880	649	419	903	0	1	0	0	0	1	1	1	2	0	0	0	0	1	1	4	0	1	0	1	0	2	0	0	0	0	1	0
AJ009632.2	1	0	2	0	4	3	7	1	1	6	2	1	1	4	3	0	1	1	1	3	1	0	0	1	0	0	1	0	1	2	0	1	3	0	2	0	0	1	0	0	3	2	2	0	0	0	0	1	0
AC090246.1	394	702	462	508	630	467	655	554	520	715	311	339	703	604	512	440	558	415	685	362	675	2	8	3	1	0	1	4	1	4	2	1	1	3	2	4	5	3	0	14	4	5	0	3	0	0	2	3	4
LINC-ROR	3	0	4	0	8	0	2	2	4	2	0	2	0	4	3	1	5	3	1	1	3	0	0	0	0	0	1	1	0	0	1	2	1	0	1	1	0	0	0	0	0	0	0	0	0	0	0	1	0
CELF2-AS2	2428	4603	3223	2676	3153	3285	3327	2081	3142	4299	2408	1432	4352	3938	3672	3132	3290	3357	2908	2993	3835	0	0	0	0	0	0	0	0	0	0	0	1	0	0	0	0	0	0	0	0	0	0	1	0	0	0	0	0
AC026904.3	0	0	0	0	1	0	0	0	1	0	1	0	0	0	0	1	0	0	0	0	0	1	1	2	2	1	0	4	0	0	2	1	5	6	0	6	2	2	2	1	3	0	2	1	0	0	0	0	0
AC008060.2	3	10	5	5	9	6	3	9	4	5	5	6	6	7	6	2	9	2	5	3	10	0	0	0	0	0	0	0	0	0	0	0	0	0	0	0	0	0	0	0	0	0	0	0	0	0	0	0	0
AL390763.1	19840	8589	7561	5894	26656	7060	10159	7709	4327	11640	35387	17311	14355	9460	11051	28072	10536	33441	6304	9841	14727	0	0	0	0	1	0	0	0	0	0	0	0	0	0	0	0	0	1	0	0	0	0	0	0	0	0	0	0
AC096541.1	1	2	2	1	0	1	2	1	3	2	1	1	1	2	0	6	0	2	0	1	1	3	1	3	0	2	0	6	1	1	3	2	2	3	2	3	1	2	0	4	1	0	0	0	0	0	1	1	0
AC103760.1	0	7	77	0	3	3	0	0	4	1	0	1	3	0	0	4	0	0	0	3	0	62	62	52	45	45	43	33	26	50	35	45	24	6	32	99	73	31	36	37	41	68	34	2	0	16	5	107	37
AC104781.1	2	1	0	1	4	1	2	1	2	2	2	0	1	1	2	2	0	2	0	2	0	0	0	0	0	0	0	0	0	0	0	0	0	0	0	0	0	0	0	0	0	0	0	0	0	0	0	0	0
AC068234.2	14	10	25	20	36	10	13	16	12	13	24	16	10	10	15	40	11	31	28	13	28	0	0	0	0	0	0	0	0	0	0	0	1	0	0	0	0	0	0	0	0	2	0	0	0	0	0	0	0
AP004609.1	10	18	33	47	22	37	15	92	34	39	16	10	98	28	37	23	14	45	15	12	17	0	1	3	0	3	2	8	0	6	7	3	2	65	2	0	3	6	1	7	6	1	1	0	0	0	1	3	0
AL133419.1	0	2	1	0	2	3	3	0	1	0	1	1	4	0	1	1	0	1	1	2	0	0	0	0	0	0	0	0	0	0	0	0	0	0	0	0	0	0	0	0	0	0	0	0	0	0	0	0	0
AC090589.3	0	0	0	1	0	0	0	0	0	0	0	0	0	0	0	0	1	0	0	0	0	4	35	54	8	23	13	49	12	22	15	17	7	20	24	17	17	18	17	21	34	7	26	4	0	10	7	33	3
AC087241.3	0	0	0	0	0	0	0	0	0	0	0	0	0	0	0	0	0	0	0	0	0	15	4	0	0	35	7	4	13	19	1	8	0	2	10	9	8	4	13	1	1	0	1	1	1	1	4	1	0
AP002336.3	183	373	1149	164	231	362	323	214	179	438	69	88	293	213	144	322	205	161	200	234	244	0	1	1	0	1	3	0	1	0	1	1	0	0	1	2	2	0	1	1	0	0	0	0	0	0	0	1	0
AC245884.1	0	0	0	0	0	0	0	0	0	0	0	0	1	0	0	0	0	0	0	1	0	0	0	0	0	1	1	1	0	0	0	1	0	0	0	0	2	0	0	0	1	0	2	0	0	0	0	2	0
AC096536.1	8	19	18	3	18	16	17	7	15	16	12	4	13	25	12	20	11	12	10	23	27	5	3	2	0	7	4	7	3	3	1	5	1	0	1	6	8	4	2	3	4	2	12	4	0	1	1	20	18
AC008517.1	10	12	10	6	21	18	12	10	12	16	12	0	19	17	4	13	10	10	0	13	17	0	0	0	0	0	0	0	0	0	0	0	0	0	0	0	0	0	0	0	0	0	0	108	0	0	0	0	0
AC142472.1	5654	9922	7531	6355	10643	8558	9732	10526	7921	10131	6209	5646	10324	9463	6703	6401	8067	6713	9028	5628	8544	22	61	45	18	31	32	67	13	44	50	33	33	63	27	50	47	45	31	86	43	22	32	17	0	5	15	50	8
AC098850.2	3	3	2	1	4	3	1	6	0	2	10	4	1	4	3	7	9	16	0	4	7	0	0	1	0	0	0	3	0	1	0	1	0	1	0	0	0	0	0	0	0	1	0	0	0	0	0	1	0
AC093833.1	100	202	129	137	172	110	191	252	164	165	95	71	323	152	169	133	206	170	196	238	267	0	0	0	0	0	0	0	0	0	0	0	0	0	0	0	0	0	0	1	0	0	0	1	0	0	0	0	0
AL356599.1	0	0	0	0	0	0	0	1	0	0	0	0	0	0	0	0	0	0	0	0	1	34	73	58	47	51	35	74	25	77	62	44	44	254	38	79	65	127	32	81	62	76	15	4	0	3	10	35	11
PDCD4-AS1	2215	4696	5653	5859	4095	4732	10471	3211	6853	9068	2463	2411	6819	4722	6398	3423	3907	388	9872	4766	9329	165	180	165	141	194	165	173	88	297	356	164	90	92	127	360	206	122	224	161	193	25	49	21	19	15	26	91	39
AC005696.4	0	0	0	0	0	0	0	0	0	0	0	0	0	0	0	0	0	0	0	0	0	27	110	110	32	57	62	149	39	70	62	36	49	49	42	83	24	47	56	40	154	19	7	12	0	2	21	100	10
LINC00900	0	0	0	0	0	0	0	0	0	0	0	0	0	0	0	0	0	0	0	0	0	34	33	38	18	41	55	31	15	46	31	48	49	75	14	52	31	57	41	33	27	10	10	6	0	0	12	7	4
AC136469.1	0	0	0	0	0	0	0	0	0	0	0	0	0	0	0	0	0	0	0	0	0	0	0	0	1	1	0	2	0	1	0	0	0	0	1	0	2	0	0	2	0	0	0	0	0	0	0	1	0
AC124283.3	0	0	0	0	0	0	0	0	0	0	0	0	0	0	0	0	0	0	0	0	0	1	8	5	0	1	3	2	1	3	1	1	3	1	6	4	1	2	1	4	3	3	8	1	0	0	1	12	0
AC073343.2	1800	5664	4232	3101	4232	2814	3658	1219	2819	4632	1917	1250	4731	4017	3371	2965	3725	2389	2188	2235	4546	1	6	8	4	4	5	8	4	5	5	3	5	20	2	4	2	5	6	8	5	1	3	2	0	1	3	1	1
AC007684.1	0	0	0	0	1	0	0	1	0	0	0	1	0	0	0	0	0	0	0	0	0	1	0	1	5	1	1	1	1	0	1	0	0	3	2	2	1	1	2	2	2	2	1	0	0	1	1	5	6
AL031775.2	20	15	15	23	22	14	26	6	25	13	17	11	43	11	21	23	19	21	14	15	18	15	24	23	28	21	24	36	15	31	28	21	13	16	30	35	24	22	21	28	31	11	17	6	2	1	7	25	13
AC112487.1	3274	5246	4380	4145	5811	3732	5104	3115	3667	5663	4174	2575	6045	5225	3712	4527	3653	3978	3640	3727	5499	0	4	4	2	2	1	4	0	1	0	1	0	1	1	2	5	1	0	3	1	0	0	2	0	0	0	68	1
AC091729.1	67	68	138	146	162	60	106	117	78	169	107	41	114	175	102	126	47	29	87	51	165	1	4	2	0	1	0	2	0	0	3	0	0	6	1	0	3	3	1	1	1	1	3	1	0	1	0	1	0
LINC01285	1014	877	1356	1082	1320	1116	1382	913	967	1479	891	749	1388	1150	1118	1184	668	1246	1171	716	1423	2	8	2	0	6	1	1	1	2	2	1	2	11	1	1	1	4	6	0	1	23	11	0	0	8	0	3	0
AC000111.1	237	787	402	211	243	914	43	84	632	1207	230	116	1037	869	1038	307	948	118	288	269	60	0	1	0	0	0	1	0	1	1	0	0	0	0	0	0	0	0	0	0	0	0	3	0	0	0	0	2	1
MCPH1-AS1	1	1	0	0	0	0	0	1	0	0	0	0	0	1	0	0	0	0	0	0	0	68	78	79	47	74	67	56	24	79	62	55	39	30	47	99	100	37	58	17	66	42	10	6	6	10	6	35	9
AL359195.1	0	0	1	0	1	1	0	4	0	1	0	1	0	0	0	1	0	0	0	0	0	0	0	0	0	0	0	0	0	0	0	0	0	0	0	0	0	0	0	0	0	0	0	0	0	0	0	0	0
AC006270.1	111	123	78	31	91	113	118	22	132	108	39	15	141	89	110	61	158	32	33	43	131	0	1	0	1	3	0	4	0	1	0	0	0	0	1	2	0	0	2	0	0	0	1	0	0	0	0	0	4
AC003986.1	34	49	26	35	29	23	54	8	46	43	18	9	44	48	23	27	41	15	18	42	50	2	0	0	0	0	0	0	0	0	0	1	0	0	0	0	0	0	1	0	1	0	1	0	0	0	0	0	0
AC099506.1	6962	8650	11962	9344	12126	14246	13099	10733	9799	12540	5655	5974	11321	12590	7742	7696	6211	9892	13344	9252	10212	0	0	1	2	1	0	0	1	2	1	0	0	0	1	1	0	0	0	1	1	0	1	0	0	0	0	0	0
AC109460.4	4	16	15	14	12	3	20	1	4	5	10	2	10	12	10	7	9	18	4	12	22	0	0	0	0	0	0	0	0	0	0	0	0	0	0	0	0	0	0	0	0	0	0	0	0	0	0	0	0
AF001548.1	2	0	1	0	1	0	0	0	0	0	0	2	0	0	1	3	0	0	0	2	1	2	8	4	0	17	0	43	7	11	105	10	13	368	14	6	6	85	9	68	9	0	0	1	15	2	3	9	0
AC079601.1	973	1291	1095	775	1465	897	949	804	1055	1230	1116	670	1305	1201	1083	1022	1026	1089	853	1210	1243	0	0	3	2	1	1	4	0	3	1	1	1	0	1	1	2	2	0	1	0	0	0	0	0	0	1	0	0
AC078845.1	0	0	0	0	0	0	1	0	0	0	0	0	1	0	0	1	0	0	0	0	0	1	3	2	0	6	2	3	0	4	0	3	1	3	3	2	2	2	1	4	1	0	0	0	0	0	0	0	0
AL589946.1	2806	4495	2272	2874	1589	2093	3187	1357	3794	3442	2999	1794	4700	3008	4471	2211	3739	2279	2766	1757	5054	0	0	1	0	0	0	3	0	0	0	0	0	0	0	0	0	0	0	0	1	0	0	0	0	0	0	0	0
AC129507.3	12	8	14	10	21	6	15	43	7	9	16	16	6	6	12	11	0	18	14	4	28	7	42	39	29	67	21	57	22	31	43	51	34	4	30	88	66	24	22	45	58	27	25	4	0	5	8	36	9
AC013264.1	1948	2925	2826	1835	2837	2522	3237	1099	2228	3735	1931	1051	3609	3139	2450	2372	2845	1787	1707	2326	3110	3	2	10	8	6	13	0	0	14	1	3	5	2	6	4	12	16	6	7	2	0	1	0	0	0	2	0	0
AC144831.1	0	0	1	0	2	0	0	0	1	0	3	1	2	1	0	0	0	0	0	0	1	35	78	136	94	163	151	108	60	187	276	111	76	87	189	327	181	99	103	351	213	2	31	17	2	9	18	9	25
LINC00310	21	26	15	40	30	18	16	16	22	23	12	15	97	32	9	15	16	22	18	42	87	5	16	14	7	4	7	5	5	3	8	9	6	14	9	8	3	11	3	8	4	1	3	3	0	0	3	8	2
AC007557.4	0	0	0	0	2	0	2	1	0	0	3	0	2	0	1	2	0	1	0	0	0	0	0	0	0	0	0	0	0	0	0	0	0	0	0	0	0	0	0	0	0	0	0	0	0	0	0	0	0
AC068898.2	6	6	14	4	8	1	7	5	5	13	4	5	6	9	3	13	6	2	12	7	7	0	0	0	0	0	0	0	0	0	0	0	0	0	0	0	0	0	0	0	0	0	0	0	0	0	0	0	0
CLEC12A-AS1	2726	8131	3170	3621	3343	3648	4500	1669	6672	6155	1754	1602	8007	7256	5749	4177	5110	1396	3104	2131	5462	3	1	1	5	3	2	5	1	4	4	7	1	1	3	4	5	3	8	2	6	0	0	0	0	1	0	2	0
AL137779.1	0	0	1	0	0	0	0	0	0	0	0	0	0	0	0	0	0	0	0	0	0	0	3	3	1	1	2	3	2	7	1	1	2	1	3	5	2	0	6	5	6	0	7	0	0	0	2	2	1
AL138808.1	2	1	0	0	3	0	0	1	0	1	0	1	0	0	0	0	0	1	1	2	0	0	0	0	0	0	0	0	0	0	0	0	0	0	0	0	0	0	0	0	0	0	0	0	0	0	0	0	0
AC090987.1	0	1	2	0	3	2	2	0	1	4	2	2	3	1	3	4	4	2	0	0	2	0	0	0	0	0	1	0	0	0	0	0	1	0	0	0	0	0	0	0	0	0	0	0	0	0	0	0	0
AP000235.1	745	729	1174	895	1209	836	1409	646	542	1084	956	474	1336	1289	797	1067	625	1133	667	589	1005	0	0	0	0	0	0	0	0	0	0	0	0	0	0	0	0	0	0	0	0	0	0	0	0	0	0	0	0
MORC2-AS1	179	479	272	380	191	289	320	224	441	436	151	118	251	286	436	90	541	174	216	75	482	5	10	10	5	9	12	7	7	13	7	9	7	5	10	7	11	7	7	7	15	26	4	0	0	1	0	1	0
AL450442.1	0	1	0	1	1	0	2	1	0	3	0	0	0	3	0	1	1	2	1	0	1	0	0	0	0	0	0	0	0	0	0	0	0	0	0	0	0	0	0	0	0	0	0	0	0	0	0	0	0
AC084116.2	18752	18370	6236	3522	34936	6652	11117	8051	10965	12469	8600	5014	9490	13490	5950	9722	8049	7873	6283	18021	11630	0	0	0	0	0	0	0	0	0	0	0	0	0	0	0	0	0	0	0	0	0	0	0	0	0	0	0	0
AC017074.2	1	4	0	1	0	0	2	0	3	4	1	0	0	1	1	1	0	0	0	0	2	0	3	5	1	1	1	4	0	0	2	1	0	0	2	0	2	0	1	0	0	2	1	0	0	1	0	0	0
KLF7-IT1	2	0	11	8	0	2	5	3	1	4	1	0	5	3	0	14	2	1	9	1	4	0	2	1	0	1	1	5	0	2	2	2	4	8	3	1	2	1	0	8	5	0	8	0	0	0	1	9	0
AC244021.1	327	244	401	373	358	266	429	393	300	519	408	313	435	405	403	393	208	309	435	185	494	11	10	9	0	10	9	15	2	7	21	4	14	57	8	16	4	32	10	7	8	8	5	0	0	0	3	2	3
RAP2C-AS1	0	3	3	0	2	1	1	1	1	1	0	1	2	0	0	2	0	3	0	4	3	29	60	34	37	62	40	55	18	45	60	45	48	195	52	72	36	69	40	62	49	113	14	14	0	6	11	59	7
AC145543.1	2	0	1	2	0	1	3	4	0	1	2	0	2	2	0	1	0	9	3	1	3	0	0	0	0	0	0	0	0	0	0	0	0	0	0	0	0	0	0	0	0	0	0	0	0	0	0	0	0
AL078601.2	185	92	253	277	46	275	590	142	342	531	74	105	343	115	204	163	195	164	198	205	194	0	0	1	3	0	0	0	0	0	0	0	1	0	0	0	2	0	0	0	0	2	3	1	0	0	0	0	0
RAET1E-AS1	1919.5	358	164.5	652	2435	247	92.5	3451.5	105	152	3123.5	2768.5	970.5	417.5	543.5	1054	1487	2407.5	2586.5	96.5	605	0	5	6	4.5	3.5	4	3.5	0	1.5	5.5	9.5	0.5	1	1	1.5	11	0.5	11	3.5	1	2	1.5	25.5	10.5	5.5	10	0	3
AC087289.1	0	0	0	0	0	0	0	0	0	0	0	0	0	0	0	0	0	0	0	0	0	1	3	8	1	0	3	5	0	5	4	7	1	1	5	2	0	2	3	1	2	3	5	2	0	0	0	7	0
AL035425.1	2115	3574	4335	2347	2585	2682	3528	855	3291	5185	2435	1347	3893	3428	4401	2766	3963	2525	2389	1675	5027	0	0	0	0	0	0	0	0	0	1	0	0	2	0	0	0	0	0	0	0	0	0	0	0	0	0	0	0
AC099482.1	2	1	3	1	5	0	1	2	4	6	1	2	5	4	1	5	5	2	1	1	1	0	0	6	0	0	0	8	0	0	0	0	0	1	4	0	0	1	3	0	0	0	0	0	0	0	0	0	0
AL357793.2	1	1	0	7	2	0	3	0	0	0	2	9	1	2	4	1	2	5	3	0	3	0	0	0	0	0	0	0	0	1	0	0	0	0	0	0	1	0	0	0	0	0	0	0	0	0	0	0	0
AC140125.2	0	0	0	2	0	0	0	0	0	1	0	0	0	0	0	1	0	0	0	0	0	0	1	2	0	4	0	0	0	3	0	1	1	0	0	3	0	1	0	7	1	0	1	0	8	0	0	0	2
FP475955.1	2	9	4	1	4	6	9	1	23	7	0	2	9	5	6	4	14	3	8	2	6	0	0	0	0	0	0	0	0	0	0	0	0	0	1	1	0	0	6	0	0	0	0	0	0	0	0	0	0
AL353622.2	3	4	4	3	4	1	4	3	3	7	3	2	7	5	8	5	3	1	0	3	5	4	3	0	1	2	7	3	1	6	2	12	3	0	0	4	3	3	6	0	1	3	2	1	0	0	1	9	0
AC021382.2	1	1	0	0	1	0	0	0	0	0	0	0	1	2	0	0	0	0	0	6	0	0	0	0	0	0	0	0	0	0	0	0	0	0	0	0	0	0	0	0	0	0	0	0	0	0	0	0	0
AC125603.1	0	0	0	0	0	0	0	0	0	0	0	0	0	1	0	0	0	0	0	0	0	0	1	3	0	0	1	0	0	0	1	1	0	0	0	1	0	0	0	0	0	1	3	0	0	0	0	0	10
AC011676.2	1	0	0	0	0	0	0	0	0	0	3	4	0	0	0	0	1	3	2	1	0	0	0	0	0	2	0	0	0	0	0	0	0	0	0	1	2	0	0	1	1	0	0	3	0	0	0	8	1
AC005920.1	0	0	0	0	0	0	0	0	0	0	0	0	0	0	0	0	0	0	0	0	0	17	31	23	13	25	0	20	4	18	27	16	24	1	13	30	13	14	14	17	11	2	10	1	2	0	13	84	5
FAM66B	61	107	454	82	87	162	102	111	79	133	17	36	102	49	31	68	50	64	75	66	60	11	6	31	6	5	14	11	2	11	1	13	7	33	8	30	11	9	19	3	8	14	4	2	0	6	4	1	0
AL354984.1	14	51	32	5	18	68	9	9	50	57	12	6	26	18	18	18	27	14	4	7	13	0	0	0	0	0	0	0	0	0	0	0	0	1	0	0	0	0	0	0	0	0	0	0	0	0	0	0	0
AC010132.4	30	9	9	5	35	6	11	12	5	10	26	21	13	13	13	25	6	46	7	34	24	2	7	5	3	4	4	3	2	3	4	5	3	10	5	6	1	4	2	0	5	1	5	1	0	5	1	1	4
LINC01763	248	268	190	165	321	117	191	143	142	261	377	217	295	177	266	249	199	366	175	225	294	0	0	1	0	0	0	1	0	1	1	0	0	1	0	1	0	0	0	0	0	0	0	0	0	0	0	0	0
AC020907.4	0	0	0	0	0	0	0	0	0	0	0	0	1	0	0	0	0	0	0	0	1	1	27	26	2	4	2	26	2	4	3	11	2	0	8	9	5	6	9	7	19	12	19	1	2	29	5	21	3
AP000402.1	482	451	456	662	715	232	689	523	261	561	550	391	603	340	596	665	275	942	413	418	685	0	0	0	0	0	0	0	0	0	0	0	0	0	0	0	0	0	0	0	0	0	0	0	0	0	0	0	0
AP000439.1	25	17	45	35	29	10	22	11	15	21	26	9	26	24	23	30	17	28	8	13	33	2	1	2	0	2	0	0	0	1	3	0	2	2	1	2	3	1	0	0	0	0	0	0	0	0	0	0	0
AC009060.1	934	1006	1478	1253	1863	1197	1584	1254	888	1529	1071	783	1525	1324	1008	1262	783	1213	1268	1268	1313	0	1	0	0	1	1	0	0	1	0	0	0	0	0	1	0	0	0	1	0	1	1	0	0	0	0	1	1
AC099520.1	0	0	0	0	0	0	0	0	0	0	0	0	0	0	0	0	0	0	0	0	0	0	0	0	1	1	0	0	0	1	0	1	1	0	0	0	0	1	0	2	1	2	1	0	0	0	1	0	0
AC034232.2	0	0	1	0	1	0	0	1	0	1	2	0	2	0	0	3	0	1	0	0	3	0	0	0	0	0	1	0	0	0	1	0	0	0	0	0	0	0	0	1	0	0	1	0	0	0	0	0	0
LINC00598	1882	697	148	1579	2547	257	158	4117	51	195	7128	2000	1306	595	865	2251	1056	4773	2127	205	1007	2	15	12	2	5	15	12	7	16	3	6	6	3	11	12	11	8	5	11	14	2	6	0	25	0	2	1	1
AC017033.1	0	0	2	5	0	1	0	1	0	0	0	0	1	0	4	1	0	1	1	0	2	1	3	0	0	1	0	3	0	0	1	1	0	5	1	0	1	3	1	2	0	0	2	16	0	0	0	2	1
AC096564.2	0	0	0	0	0	0	0	0	0	0	0	0	0	0	0	0	0	0	0	0	0	3	3	2	1	4	3	6	4	5	3	2	1	1	3	3	2	5	1	22	0	2	2	0	0	0	0	6	0
AC091965.4	0	0	0	0	0	0	0	0	0	0	0	0	0	0	0	0	0	0	0	0	0	2	1	1	1	3	0	1	1	2	3	2	2	6	3	2	5	5	2	1	0	7	3	0	0	0	1	1	3
AC245140.2	1305	672	847	1006	1738	417	849	1259	524	699	1885	1228	1135	935	766	1376	594	1818	797	638	994	25	77	90	34	55	36	62	30	56	42	61	40	13	39	79	81	21	60	92	60	100	74	14	10	15	29	234	32
AL133153.2	0	0	0	0	0	0	0	0	0	0	0	0	0	0	0	0	0	0	0	0	0	2	1	3	2	1	0	1	0	2	1	2	2	0	1	5	5	3	3	1	4	11	1	1	0	1	1	0	2
AC069360.1	0	0	0	0	0	0	0	0	0	0	0	0	0	0	0	0	0	0	0	0	0	4	2	2	4	1	3	1	0	1	3	3	5	4	0	1	4	7	1	2	0	0	0	2	0	1	0	3	0
AC093579.1	703	928	686	746	765	735	1022	532	1034	1094	612	515	1287	1019	818	731	750	749	749	643	1054	0	0	0	0	0	0	0	0	0	0	0	0	0	0	0	0	0	0	0	0	0	0	0	0	0	0	0	0
AL157896.1	86	130	174	140	102	97	113	162	136	200	77	84	150	205	160	77	192	90	243	111	165	0	1	0	0	1	1	0	0	0	0	0	0	1	0	0	0	0	0	0	0	0	0	0	0	0	0	0	0
LINC01723	4	13	11	7	19	2	10	8	3	9	7	4	6	6	5	4	5	6	13	5	12	0	0	0	0	0	0	0	0	0	0	0	0	0	0	0	0	0	0	0	0	0	0	0	0	0	0	0	0
AC125807.2	100	37	52	54	94	99	106	41	62	249	105	60	356	112	19	16	581	59	80	223	477	77	178	109	49	127	58	147	33	155	149	121	216	79	63	120	132	63	106	100	124	127	169	98	35	57	65	92	94
AP005057.1	108	58	106	132	84	54	78	56	67	116	124	65	120	91	63	91	122	155	65	107	110	0	0	0	0	0	0	0	0	0	0	0	0	0	0	0	0	0	0	0	0	0	0	0	0	0	0	0	0
AC010336.1	9	5	8	9	9	5	7	9	6	8	6	4	6	5	6	14	4	11	6	4	9	3	2	3	2	3	2	2	1	0	0	2	2	0	0	3	1	2	0	0	2	7	1	2	0	2	2	9	3
AP003025.2	0	1	0	0	0	0	0	0	0	0	1	0	1	0	0	0	0	0	0	1	0	0	1	0	0	0	0	0	0	0	0	0	0	0	0	0	0	0	0	0	0	0	1	0	0	0	0	0	0
AC021755.3	1471	1199	1614	567	841	680	1608	1203	900	1722	1128	1070	1199	709	1369	987	1207	1112	812	609	1613	1	1	5	0	2	1	3	1	1	1	1	0	2	1	3	0	0	0	6	1	5	0	0	0	0	0	0	0
AC113398.2	1	2	7	6	3	1	2	2	1	2	2	0	5	15	0	3	1	0	3	1	5	0	0	0	0	0	0	0	0	0	0	0	0	0	0	0	0	0	0	0	0	0	0	0	0	0	0	0	0
LINC00511	1857	3154	2350	1297	1977	2466	2261	1164	2054	3243	1489	1137	3243	2646	2365	2019	2780	2033	1785	1854	2400	2423	970	1767	1072	2228	1375	1025	882	2377	2284	1427	2093	154	2227	2733	1157	916	1672	2824	1599	1371	1345	614	202	325	567	3905	190
AC126696.1	1	0	1	5	2	0	3	2	3	2	2	1	0	2	0	3	0	4	0	5	1	0	0	0	0	0	2	0	0	4	2	0	0	0	0	0	2	1	1	0	0	0	0	0	0	0	1	0	0
AC067852.6	0	1	1	0	0	0	1	0	1	0	1	0	1	0	1	1	1	0	1	2	0	10	28	61	11	15	17	24	24	25	14	28	13	25	37	22	26	12	8	43	35	11	32	3	0	4	2	20	3
AC010275.1	0	0	1	0	1	0	0	1	0	0	0	1	0	1	0	2	1	0	0	1	2	0	1	1	1	0	0	2	1	0	0	0	0	0	1	0	0	2	1	1	1	0	0	0	0	0	0	1	0
AC108134.1	2	1	0	1	4	3	2	1	2	6	2	3	2	1	3	2	3	1	1	1	4	27	210	442	80	181	170	199	79	140	156	144	74	13	244	319	202	82	217	125	349	80	183	24	17	70	26	194	52
AC010203.2	0	0	0	1	0	0	1	0	0	0	0	0	0	0	0	0	0	1	0	1	0	4	0	6	4	5	3	9	2	9	5	4	3	3	2	8	9	1	4	4	7	0	1	0	0	0	0	18	1
TAB3-AS2	290	333	297	266	268	291	277	134	436	435	262	149	381	509	283	254	290	267	299	418	436	0	0	0	0	0	0	0	0	0	0	0	0	0	0	0	0	0	0	0	0	0	0	0	0	0	0	0	0
AL590004.4	0	1	0	0	2	0	0	1	0	0	1	0	0	0	0	0	0	1	0	1	1	6	1	0	0	2	0	1	0	0	3	0	2	3	0	0	1	2	1	4	0	29	20	0	2	3	5	178	60
AC026462.4	1151	1661	2022	1493	2506	1957	1665	1972	1818	2666	1261	999	2259	2373	1754	1816	1140	1875	1697	1742	1902	0	0	0	0	0	0	0	0	0	0	0	0	0	0	0	0	0	0	0	0	0	0	0	0	0	0	0	0
AC015540.1	1801	1447	2070	2301	1956	1423	2470	2400	1347	2400	1085	868	2565	1994	1651	1856	1020	1337	2637	1278	1602	0	0	0	0	0	0	0	1	0	1	0	0	1	1	0	0	1	0	0	0	0	0	0	0	0	0	0	0
AC091020.1	333	496	429	296	458	522	374	501	278	500	239	226	605	324	281	347	297	750	260	187	351	0	1	0	0	0	0	0	0	0	0	0	0	0	2	1	1	0	0	0	0	0	0	0	6	0	0	0	2
AC090771.2	355	436	311	153	167	142	292	54	695	461	272	108	429	444	176	271	843	189	147	263	936	0	2	1	0	1	0	0	2	0	0	2	0	0	1	0	0	0	0	0	0	0	0	0	0	0	0	0	0
AC004415.1	117	63	102	69	78	73	110	83	97	117	156	92	93	88	70	109	93	172	138	93	115	0	0	0	0	0	0	0	0	0	0	0	0	0	0	0	0	0	0	0	0	0	0	0	0	0	0	0	0
AC015961.2	0	0	0	0	0	0	0	0	0	0	0	0	0	0	0	0	0	0	0	0	0	0	8	4	2	2	2	8	4	4	1	2	4	4	0	3	2	5	1	0	2	0	0	0	0	0	0	2	1
AC023825.2	3167	5548	3692	2784	6351	5636	5314	3661	3503	6537	2597	2221	6709	5057	3696	3388	4966	2974	3408	3419	4349	0	3	0	0	1	2	7	0	2	0	3	1	0	3	1	1	0	0	1	1	0	11	2	0	2	1	1	0
AC092832.2	0	1	2	0	2	0	0	0	0	2	1	0	0	0	0	1	0	1	0	0	1	0	0	0	0	0	0	0	0	0	0	0	0	0	0	0	0	1	0	0	0	0	0	0	0	0	0	0	0
Z95331.1	451	649	660	559	850	460	631	357	720	680	312	296	625	729	474	588	328	550	510	578	671	4	22	16	7	15	17	35	16	22	9	19	10	10	25	26	26	19	19	11	15	21	37	16	6	4	13	105	14
LINC00847	66	52	77	67	106	41	53	64	53	77	68	44	57	76	44	81	46	93	59	36	70	470	821	620	628	679	729	485	430	850	900	774	502	628	277	888	664	525	534	399	424	402	325	114	64	116	216	861	435
AC027237.2	5	10	25	18	23	4	14	5	3	9	11	6	17	28	9	13	3	8	10	20	12	3	4	3	1	1	3	2	0	2	2	2	2	2	0	0	2	0	1	3	0	2	2	0	0	0	1	10	2
AC010973.1	2559	3305	3858	2850	5093	3654	4508	2733	2606	4296	2804	1937	4449	4130	2871	3350	2454	3651	3073	2435	3960	1	6	8	2	5	4	16	2	1	0	3	3	5	5	2	1	0	3	3	7	4	11	0	0	0	2	7	1
AC026691.1	0	0	0	0	0	0	1	0	0	0	0	0	0	0	1	0	0	0	0	0	0	6	23	22	10	21	11	22	6	12	23	13	16	81	14	22	17	48	21	36	10	11	18	6	0	3	9	39	6
AL365181.2	17	10	33	13	11	8	12	8	10	7	14	11	11	9	21	4	21	14	10	7	11	23	95	121	194	116	117	223	40	257	333	289	82	12	162	257	110	107	175	308	301	81	148	92	10	19	48	553	240
AC087269.1	0	0	0	0	0	0	0	0	0	0	0	0	0	0	0	0	0	0	0	0	0	6	4	4	2	5	0	1	1	1	2	4	0	0	2	5	4	2	3	1	4	1	0	0	0	0	2	0	0
LINC01616	34	31	28	7	12	35	22	9	21	35	25	6	33	41	16	28	19	9	62	32	16	0	1	0	0	0	0	2	0	0	2	0	0	1	0	0	0	0	0	1	0	0	0	0	0	0	0	0	0
LINC02163	3	2	3	8	1	4	4	0	0	9	0	3	2	1	0	1	1	3	0	4	8	0	0	0	0	0	0	0	0	0	0	1	0	0	0	0	0	0	0	0	0	59	32	0	0	2	0	54	8
AC107884.1	0	0	0	0	0	0	0	0	0	0	0	0	0	0	0	0	0	0	0	0	0	16	99	151	35	52	51	64	33	106	59	83	49	12	54	94	73	19	34	41	112	71	11	2	1	1	7	16	2
AC091180.3	5	4	3	6	8	2	1	4	2	15	7	1	2	3	7	9	5	8	7	9	2	0	0	0	0	0	0	0	0	0	0	0	0	0	0	0	0	0	0	0	0	0	0	0	0	0	0	0	0
AL590302.1	1018	2824	1523	1999	4038	965	1701	2903	1014	2465	1160	1308	2800	1832	1227	1297	1983	1481	2056	787	1168	0	0	0	0	0	0	0	0	0	0	0	0	0	0	0	0	0	0	0	0	0	0	0	0	0	0	0	0
AC120498.2	7	34	18	12	18	12	12	14	15	16	17	11	14	13	10	7	18	12	22	10	25	3	0	27	1	3	9	10	3	6	0	0	10	0	3	0	5	1	0	16	16	0	2	0	0	2	2	1	0
LINC01389	0	0	0	0	0	0	0	0	0	0	0	1	0	0	0	0	0	0	0	0	0	73	48	112	61	140	85	65	78	125	63	87	32	10	119	96	83	59	103	12	92	31	14	4	0	3	7	55	16
LINC00368	103	129	254	176	120	93	118	179	104	134	72	104	87	153	81	107	102	132	244	77	99	0	0	1	0	1	0	0	0	0	0	0	0	0	0	0	0	0	0	0	0	0	0	0	0	0	0	0	0
AC106038.1	0	0	0	0	0	0	1	0	0	0	0	0	0	0	0	0	0	1	0	0	0	2	1	5	3	3	3	11	2	6	3	5	5	11	0	5	5	9	4	4	2	0	0	0	0	0	1	15	4
AC254629.1	0	0	1	1	1	0	0	0	1	2	0	0	1	0	0	0	1	1	0	0	2	715	927	2492	823	929	1029	1229	625	1164	1344	798	771	77	1646	1519	1739	680	1030	181	2707	381	354	93	139	154	151	28	217
AC091212.1	947	970	1381	1066	1429	973	1336	1217	1008	1430	849	815	1396	1254	1011	1046	766	1078	1201	945	1336	0	0	0	0	0	0	0	0	0	0	0	0	1	0	0	0	0	0	0	1	0	0	2	0	0	0	2	0
AC008750.7	12	69	24	33	23	24	16	25	15	23	26	11	12	7	10	14	41	152	34	11	37	1	4	0	1	0	1	0	0	0	1	1	1	0	1	2	1	1	3	0	1	1	1	0	0	0	2	0	0
LINC01139	30	21	266	40	38	27	37	64	53	57	34	20	51	44	42	29	200	38	787	32	44	7	8	8	14	0	2	0	3	10	0	0	2	18	0	6	3	8	0	13	0	4	1	0	3	0	0	0	3
AC006042.1	142	154	152	193	402	72	164	86	165	205	172	125	195	127	176	108	159	191	162	170	286	1	51	86	47	39	28	109	46	53	31	75	21	9	57	72	61	21	23	28	37	63	51	16	6	10	9	77	45
AL445426.1	1996	2739	3464	2731	3538	2334	3428	1961	1999	3452	2553	1774	3319	3329	2364	2840	2084	2462	2607	1964	3351	16	10	8	1	12	7	32	3	14	5	10	8	7	6	7	12	5	8	7	17	1	2	0	14	0	0	1	0
AC114730.3	661	946	771	679	661	690	904	530	795	986	719	471	1082	777	958	607	800	720	920	677	1131	1	13	29	7	2	7	24	2	9	6	13	2	2	9	8	12	2	8	15	23	5	10	1	2	5	3	22	0
AC069224.1	0	0	0	0	0	0	1	0	1	0	0	0	0	0	0	0	0	0	0	0	0	53	35	43	41	20	29	38	14	43	36	38	11	29	22	42	28	24	27	23	33	41	19	7	0	3	11	116	3
AC008440.3	0	4	0	0	1	0	1	0	2	2	0	1	3	2	0	0	2	1	0	0	1	0	1	1	0	0	1	4	2	0	2	2	2	1	0	1	5	1	1	0	3	2	4	0	0	1	8	0	1
AC060766.4	0	0	0	0	1	1	1	0	0	1	0	0	0	0	1	0	0	0	0	0	0	2	12	3	8	8	23	35	8	14	4	10	16	23	3	12	8	17	10	7	2	5	17	5	1	1	2	20	10
AC084116.3	1697	867	875	1295	1757	801	999	2875	583	1109	2275	1729	1489	742	1098	1436	1030	2357	1673	872	1282	0	0	0	0	0	0	0	0	0	0	0	0	0	0	0	0	0	0	0	0	0	0	0	0	0	0	4	0
THRA1/BTR	0	0	0	0	0	0	0	0	0	0	0	0	0	0	0	0	0	0	0	0	0	1	0	3	2	0	2	0	1	3	2	0	1	0	0	1	2	0	1	0	0	2	1	3	0	0	3	15	1
AC006065.4	273	363	491	321	606	84	117	315	124	245	323	332	179	182	169	224	999	426	338	141	226	0	0	0	0	0	0	0	0	0	0	0	0	0	0	0	0	0	0	0	0	0	0	0	0	0	0	0	0
TMEM108-AS1	20	18	38	17	40	17	37	14	19	32	8	9	32	35	7	21	33	25	15	16	15	0	0	0	0	0	0	0	0	0	0	0	0	0	0	0	0	0	0	0	0	0	0	0	0	0	0	0	0
LINC01210	0	0	0	0	0	0	0	0	1	0	0	0	0	1	0	0	0	0	0	0	0	0	0	0	0	0	0	0	0	0	0	0	0	0	0	0	0	0	0	0	0	0	1	0	0	0	0	0	0
AL590006.1	5	3	1	2	2	0	1	1	1	3	3	0	1	1	1	4	0	4	0	2	2	1	2	3	2	4	1	2	0	4	0	2	1	0	2	0	3	1	2	2	0	2	1	0	0	0	3	4	0
AL021707.8	43	37	48	27	28	6	18	35	13	57	44	48	38	33	38	36	19	49	43	86	46	1	12	20	1	5	6	17	4	8	3	9	9	6	8	10	10	7	3	6	26	2	7	1	5	4	4	12	0
LINC01853	0	0	0	0	1	0	1	0	0	1	0	0	0	0	0	0	0	0	0	0	0	0	0	0	0	0	0	0	0	0	0	0	0	0	0	0	0	0	0	0	0	0	0	0	0	0	0	0	0
AL358472.2	123	199	172	131	158	260	189	151	297	257	97	70	319	252	134	146	184	138	140	234	183	57	66	31	43	39	42	43	11	26	21	44	34	58	8	41	20	30	35	44	35	37	30	20	17	10	14	86	14
AL080314.2	0	1	4	0	2	4	1	0	0	0	0	0	0	4	1	2	1	1	1	2	3	107	48	41	46	73	53	53	35	48	38	35	57	8	73	116	80	51	68	4	41	21	9	2	1	1	4	11	1
FAM27E5	2	4	5	5	12	2	6	2	3	5	0	5	2	1	3	6	2	3	2	4	5	0	0	0	0	0	0	0	0	0	0	0	0	0	0	0	0	0	0	0	0	0	0	0	0	0	0	0	0
AC092431.1	10	10	11	7	17	13	16	12	15	21	12	6	15	21	17	12	13	19	10	12	15	0	0	1	1	1	0	3	1	4	1	1	1	1	3	9	1	1	1	2	0	2	1	0	0	0	0	1	0
AC018618.1	0	0	0	1	0	0	1	0	0	0	0	0	0	0	1	0	0	0	0	0	0	2	2	2	2	0	0	1	1	1	3	2	0	0	1	3	0	1	1	0	2	0	0	0	0	0	0	0	0
LINC01720	96	163	534	86	159	122	111	99	139	229	39	43	132	121	72	143	95	93	88	109	144	0	0	0	0	0	0	0	0	0	0	0	0	0	0	0	0	0	0	0	0	0	0	0	0	0	0	0	0
AL928654.2	12262	43172	15933	14580	15300	22044	19942	21702	23604	27693	11762	9798	25877	23429	21722	13162	38753	9715	22713	9073	15677	43	53	52	43	46	36	40	21	75	55	42	25	58	48	76	43	53	48	160	58	26	58	6	16	13	22	92	25
LINC00992	0	0	0	0	0	0	0	0	0	0	0	0	0	0	0	0	0	0	0	0	0	165	155	176	152	240	159	178	104	250	246	191	129	23	124	202	176	110	146	147	185	19	197	23	6	43	21	64	33
AC064834.1	0	0	0	0	0	0	0	0	0	0	0	0	0	0	0	0	0	0	0	0	0	0	0	0	0	0	0	0	0	0	0	0	0	0	0	0	0	0	2	1	0	0	0	0	0	0	0	0	0
AP000253.1	3704	4142	5652	3640	6287	4901	5703	4426	3500	6860	5520	3070	6295	5169	4513	4821	4053	5400	3602	4666	5685	2	1	4	0	1	2	4	1	2	3	4	0	0	8	3	5	3	4	4	3	1	1	1	0	0	0	16	2
MIR4458HG	4814	12551	5537	7326	5004	12307	14678	4450	18861	13100	3423	4421	16993	12904	14271	5785	15202	4171	12431	9208	11584	517	239	254	301	471	322	329	205	336	367	226	280	227	257	276	404	337	259	256	317	238	120	139	20	56	115	195	83
AC092436.2	117	135	171	206	237	135	233	48	100	229	136	50	194	197	138	167	119	177	96	208	239	0	0	0	0	1	0	0	0	0	0	0	0	0	0	0	0	0	0	0	0	0	0	0	0	0	0	1	0
LINC01179	0	1	0	0	1	0	0	0	1	2	0	0	0	0	0	0	0	0	0	0	0	0	0	0	0	0	0	0	0	0	0	0	0	0	0	0	0	0	0	0	0	0	0	0	0	0	0	0	0
MKLN1-AS	8	17	4	5	2	8	12	2	17	13	1	3	3	5	9	2	8	0	13	4	22	99	155	64	93	165	118	151	77	159	116	145	116	92	76	159	125	102	92	293	71	173	73	26	0	28	42	297	158
AC092944.1	0	1	2	0	0	0	0	0	1	0	0	0	0	0	0	0	1	0	0	1	1	19	25	26	12	28	13	17	13	35	22	15	16	21	21	35	28	15	25	43	24	24	5	6	0	1	2	18	4
AC026367.1	0	0	0	0	0	0	0	0	0	0	0	0	0	0	0	0	0	0	0	0	0	4	7	4	2	3	2	4	4	5	4	3	3	4	8	10	7	5	6	2	3	6	4	1	0	0	2	24	5
AL158070.1	0	0	0	0	0	0	0	0	0	0	0	0	0	0	0	0	0	0	0	0	0	1	1	0	0	1	1	1	1	4	0	3	0	0	3	1	1	1	0	1	1	1	1	0	0	0	0	3	2
AC018558.3	1	6	3	3	14	3	2	0	1	4	2	4	6	10	1	6	2	10	1	9	3	0	0	0	0	0	0	0	0	0	0	0	0	0	0	0	0	0	0	0	0	0	0	0	0	0	0	0	0
AC079315.1	0	0	0	0	0	0	0	0	0	0	1	0	0	0	0	0	0	0	0	0	0	2	5	12	2	5	3	17	2	6	9	8	1	28	4	6	6	10	7	14	2	9	7	0	0	8	7	9	2
TBX5-AS1	0	0	0	1	0	0	0	0	1	1	0	0	0	0	0	1	0	0	0	0	1	0	0	0	0	0	0	0	0	0	0	1	0	1	0	1	0	1	1	0	0	0	1	0	0	0	1	0	0
AC026704.1	0	0	0	0	0	0	0	0	0	0	0	0	0	0	0	0	0	0	0	0	0	8	8	5	3	18	6	12	4	3	1	3	3	0	10	2	9	0	0	8	4	6	12	6	1	3	9	45	18
AC134775.1	3974	8537	5816	4703	7473	7541	8453	7862	8630	8652	3428	3784	8787	7588	5193	4274	7160	4365	7113	3852	6679	0	3	1	1	1	1	2	0	0	2	2	1	0	1	2	0	0	5	2	3	0	3	0	0	0	0	2	0
AC007388.1	3	1	1	4	7	2	3	2	3	2	12	4	3	2	1	9	5	5	3	2	5	385	330	235	291	435	304	302	224	427	381	249	226	320	330	381	357	282	257	694	364	421	244	53	5	15	85	492	419
LINC01053	361	2899	584	387	179	854	1453	223	499	1119	325	200	1218	618	710	567	656	89	353	149	1165	0	0	0	0	0	0	0	0	0	0	0	1	0	0	0	0	0	0	0	0	0	0	0	0	0	0	0	0
AC026391.1	2	4	8	1	5	0	2	2	2	12	5	2	1	2	3	2	0	1	0	0	0	21	4	23	8	10	6	15	0	9	6	9	7	2	2	5	2	3	7	12	1	0	0	0	0	0	1	0	0
EHD4-AS1	6	3	5	2	6	8	7	3	4	4	3	0	5	7	7	3	1	1	3	55	6	6	7	14	4	2	1	14	3	9	3	6	6	0	12	9	8	5	8	6	5	4	1	1	0	0	4	5	3
AC004832.5	0	0	0	0	0	0	0	0	0	0	1	0	0	0	0	0	1	0	0	1	0	0	2	6	0	2	3	2	0	3	1	1	0	4	3	7	1	1	3	17	1	3	3	0	0	0	2	16	3
AC013724.1	1971	5187	3329	1853	3127	4457	3969	1349	3366	4994	1583	1332	5650	4479	3628	2871	4642	2253	1909	3152	3493	0	0	0	1	0	0	0	0	0	0	0	0	1	0	0	0	0	0	0	0	0	0	0	0	0	0	0	0
AC023490.3	102	108	153	134	99	63	205	60	145	124	87	89	156	121	155	124	88	115	181	86	218	1	0	0	0	0	0	1	0	0	0	0	0	0	0	0	0	0	1	0	0	0	0	0	0	0	0	0	0
AC104137.1	0	1	2	1	1	0	2	1	0	2	0	2	0	2	1	1	0	0	4	0	1	0	0	0	0	0	0	0	0	0	0	0	0	2	0	0	1	1	1	2	0	0	0	0	0	0	0	0	0
AL583859.2	4	0	2	4	4	1	3	2	5	5	3	3	2	3	1	2	2	6	6	1	3	0	0	0	0	0	0	0	0	0	0	0	0	0	0	0	0	0	0	0	0	0	0	0	0	0	0	0	0
AL136164.2	7	4	20	12	8	5	14	5	6	6	10	5	13	11	7	12	9	13	7	10	15	0	0	0	0	0	0	0	0	0	0	0	0	0	0	0	0	1	0	0	0	0	0	0	0	0	0	0	0
ADPGK-AS1	0	0	0	0	0	0	0	0	0	0	0	0	0	0	0	0	0	0	0	0	0	8	8	10	2	5	8	7	0	7	6	4	3	3	4	10	8	0	13	1	4	1	3	1	1	0	3	4	0
AC046168.2	136	84	135	115	153	96	115	158	104	167	118	108	127	94	120	90	95	214	117	92	186	1	3	2	1	1	1	1	2	2	1	1	2	2	2	5	1	1	5	2	0	2	0	0	0	0	0	43	0
AL135999.2	0	0	0	0	0	0	0	0	0	0	0	0	0	0	0	0	0	0	0	0	0	0	3	3	0	2	2	3	1	1	2	0	2	2	1	1	1	1	2	2	2	1	1	0	0	0	0	3	1
ZNF663P	0	0	0	0	0	0	0	0	0	0	0	0	0	0	0	0	0	0	0	0	0	3	3	22	2	3	3	4	0	10	4	10	6	15	4	1	5	9	2	1	4	2	46	0	0	0	1	0	0
AC090993.1	1369	2613	2441	2084	2654	2025	2639	1705	1908	2932	1390	982	2704	2935	1743	2073	1887	1488	2469	1614	2776	0	1	1	0	1	2	1	2	2	1	1	1	0	0	0	0	0	1	0	0	0	0	0	0	0	0	0	0
AC109587.1	4286	8711	4739	4271	6826	7082	7819	8647	6644	8359	3634	4032	8420	7408	4990	4177	6997	3905	7827	4013	5524	15	37	45	21	38	20	63	26	29	29	36	27	27	33	34	36	44	23	35	27	16	26	9	0	3	12	43	19
AL354696.2	1096	1677	1448	1466	1442	1641	1676	816	2087	2087	750	565	2313	2539	1599	1389	1593	1054	1658	1438	1956	12	14	14	9	7	9	7	5	37	14	11	10	18	8	32	20	12	14	11	13	22	12	1	0	3	4	19	24
AC016383.1	2745	5910	2510	2088	3300	4323	3990	1230	2886	5199	2888	1462	4906	4698	4003	4519	4045	2295	1973	2646	4777	0	0	0	0	0	0	0	0	0	0	0	0	0	0	0	0	0	0	0	0	0	0	0	0	0	0	0	0
AL772155.1	0	0	0	0	0	0	0	0	0	0	0	0	1	1	0	0	0	0	0	0	0	0	0	0	0	0	0	0	0	0	0	0	0	0	0	0	0	0	0	0	0	0	2	0	0	0	0	0	0
AC138024.1	0	3	12	2	1	1	2	2	3	0	4	3	2	0	3	7	0	4	3	1	1	0	0	0	0	0	0	0	0	0	0	0	0	0	0	0	0	0	0	0	0	0	0	0	0	0	0	0	0
AL022337.1	2	2	2	1	1	2	1	1	0	3	1	1	1	0	0	1	2	0	0	0	3	0	0	0	0	0	0	0	0	0	0	0	0	0	0	0	0	0	0	0	0	0	0	0	0	0	0	0	0
AC106037.2	15	17	5	8	20	13	18	3	15	16	12	3	17	13	4	20	15	8	8	20	25	3	7	17	4	7	4	21	11	5	3	4	0	5	30	13	7	5	4	3	10	0	3	0	0	0	2	10	3
SCAMP1-AS1	0	1	0	0	1	0	0	0	1	1	1	0	3	8	0	0	0	1	0	0	0	625	245	283	397	320	268	285	115	221	326	295	280	167	172	392	292	176	217	301	275	223	219	108	5	31	103	561	159
AC007879.3	0	1	2	0	1	3	0	0	2	5	1	0	2	2	1	8	0	0	1	7	3	2	2	7	0	2	4	2	2	2	3	4	3	1	3	2	1	2	4	6	3	3	1	3	0	0	1	5	1
AC008735.2	1681	3100	5039	4162	3220	1655	3018	1343	2415	4388	1074	524	3733	2734	2522	2224	1542	3327	2857	1861	3308	8	44	98	26	23	41	55	21	30	9	34	21	23	43	49	41	15	19	21	95	37	51	9	5	23	18	143	12
AP003555.1	464	702	607	693	627	502	772	751	463	720	399	373	675	590	471	504	570	548	775	312	676	0	2	1	0	0	0	0	0	1	2	1	0	0	0	4	1	0	0	1	0	0	0	6	0	0	0	0	0
GPC6-AS1	6	7	1	1	6	10	4	1	29	17	2	4	15	20	9	2	39	0	6	9	11	0	0	0	0	0	0	0	0	0	1	0	0	0	0	0	0	0	0	0	0	0	0	0	0	0	0	0	0
AC091564.6	0	0	0	0	0	0	0	0	0	0	0	0	0	0	0	0	0	0	0	0	0	0	0	2	1	0	2	2	0	0	2	1	1	1	0	2	1	1	0	0	1	7	0	0	0	0	0	0	1
AC104187.1	3	1	3	2	4	0	1	6	3	0	1	4	2	0	7	4	3	3	4	0	1	3	3	5	1	3	1	0	0	2	0	2	1	0	1	1	1	1	2	2	0	1	5	3	2	0	2	1	1
FAM157C	11156	20477	14598	11089	15830	14239	15993	12592	14578	19768	11362	7682	18842	16048	13050	12256	17429	11519	14015	10326	15081	0	3	19	3	7	3	26	2	10	1	5	5	3	11	17	9	2	4	3	6	2	4	0	1	6	2	8	6
FLJ37453	21	15	15	18	24	10	19	15	5	10	22	24	12	18	20	30	19	28	17	13	22	218	232	172	209	199	144	213	76	210	242	210	172	248	153	248	271	159	171	246	259	104	80	71	4	12	70	457	74
FAM138E	346	565	1046	348	174	467	316	329	427	474	121	165	496	520	311	412	612	336	722	205	326	0	0	0	0	0	0	0	0	0	0	0	0	0	0	0	0	0	0	0	0	0	0	0	0	0	0	0	0
AC113143.1	1	0	2	4	4	1	0	0	1	1	0	0	2	1	4	2	1	7	0	0	0	0	0	0	1	1	0	1	0	1	3	2	0	0	1	1	2	0	3	1	2	2	3	0	0	0	0	1	5
AC004691.1	0	0	0	0	0	0	0	0	0	0	0	0	0	0	0	0	0	0	0	0	0	2	5	0	0	0	0	3	0	0	0	0	1	3	0	2	0	2	0	0	1	2	1	0	0	0	0	0	2
AC064802.1	1	1	2	0	0	1	0	0	0	0	0	0	0	0	0	1	0	2	0	1	2	0	0	0	0	0	0	0	0	0	1	0	0	0	0	0	1	0	0	0	0	0	0	2	0	0	0	0	0
AL137798.1	0	0	0	0	0	0	0	0	0	0	0	0	0	0	0	0	0	0	0	0	0	0	0	0	1	2	1	0	0	1	1	1	0	0	1	2	0	1	1	4	2	0	0	0	0	0	0	1	1
LINC02018	22	10	13	21	18	5	7	73	3	10	38	27	8	6	17	6	18	29	35	6	16	11	31	8	17	11	11	23	3	5	13	21	4	9	8	16	12	8	6	12	27	5	21	3	0	5	5	12	22
Z97986.1	66	95	107	120	106	81	161	100	128	142	90	59	119	71	124	107	79	69	229	74	167	0	0	0	0	0	0	0	0	0	0	0	0	0	0	0	0	0	0	0	0	0	0	0	0	0	0	0	0
[truncated: 472 more columns]
